# Supplementary material for: Electrochemical characterization of manganese oxides as a water oxidation catalyst in proton exchange membrane electrolysers
Source: R Soc Open Sci. 2019 May 22;6(5):190122. doi: 10.1098/rsos.190122 (PMC6549974; doi:10.1098/rsos.190122)
Supplement: Data for Graphs [file rsos190122supp2.xlsx]

## Sheet: Figure_2
2 theta / degrees	Intensity / a.u.
	(a) Alfa-MnO2	(b) Beta-MnO2	(c) Delta-MnO2	(d) Ganma-MnO2
10	15609.1	21274.8	28032.2	19698.1
10.02	15498.9	21528.9	28022.4	19993.6
10.04	15680.8	21451	27956.8	19651
10.06	15560.2	21746.4	27912.6	19627.3
10.08	15533.1	21358.3	27758.2	19444.4
10.1	15715	21263.9	27667.5	19512.3
10.12	15590.3	21228.1	27931.4	19521.6
10.14	15560.9	21358.4	27536	19521.6
10.16	15460.4	21303.2	27657.5	19480
10.18	15548.7	21159.5	28070.3	19389.3
10.2	15228.6	21487	28020.5	19593.3
10.22	15404.1	21245.4	27955.8	19471.2
10.24	15587.3	21612.3	28010.5	19567.4
10.26	15862	21432.8	27713	19817.4
10.28	15498.4	21149.7	27651.1	19419
10.3	15417	21633.3	27775.8	19633.4
10.32	15672.2	21407.1	27835.6	19402.4
10.34	15754.6	21641	27920.6	19392.8
10.36	15641.8	21304.2	27830.5	19409.7
10.38	15641.4	21571.4	27742.3	19591
10.4	15556.2	21397.3	27374.8	19543.5
10.42	15532.8	21450.4	27550.5	19506.3
10.44	15571.9	21362.9	27672.1	19447.9
10.46	15531.4	21472.7	27957.5	19493.1
10.48	15505.8	21482.2	27438.5	19590
10.5	15621.6	21326	27726.9	19679.8
10.52	15709.8	21371.9	27970.1	19286.9
10.54	15605.7	21465.4	27834.5	19361.1
10.56	15407.7	21464.1	27913.4	19289
10.58	15621.2	21483.2	27859.8	19767.8
10.6	15518.1	21406.8	27919.9	19519.6
10.62	15708.9	21453.8	27793.5	19399.3
10.64	15643.9	21510.8	27755.2	19248.6
10.66	15584.8	21409.8	27392.2	19262.9
10.68	15626.5	21305.9	27638.4	19450.4
10.7	15551.1	21375.6	28085.1	19357.1
10.72	15546	21101.5	27888.9	19485.6
10.74	15470.2	21473.3	27658.3	19596.7
10.76	15676.6	21100.6	27964.5	19535.2
10.78	15794.4	21142.3	27877.6	19311.8
10.8	15633.3	21411.8	27799.2	19158.1
10.82	15687.7	21406.1	28026.7	19514
10.84	15704.6	21214.3	27869.9	19441.1
10.86	15824.9	21405.4	27499.4	19277.6
10.88	15724.1	21328	27881	19417.4
10.9	15805.1	21295.9	27819	19282.5
10.92	15969.4	21347.7	27849.1	19418.9
10.94	15760.7	21335.1	27839.3	19324.9
10.96	15749.4	21379.8	27767.2	19564.5
10.98	15739.5	21371.7	27812.4	19279.5
11	15851.5	21437.5	27940.7	19457.1
11.02	15599.9	21144.9	27740.7	19474.8
11.04	15709.4	21333.8	27784.1	19250.2
11.06	15645.9	21283.1	27577.6	19372.6
11.08	15863	21190.7	27828.2	19271.9
11.1	15851.4	21354.3	27788	19244.3
11.12	15544	21506.9	28034	19299.4
11.14	15687.9	21615.9	27695.3	19468.6
11.16	15627.1	21376.5	27827	19439.1
11.18	15803.5	21186.1	27842.9	19298.8
11.2	15808.5	21422.4	27934.1	19254.2
11.22	15993	21314.9	27753.3	19025.8
11.24	15829.6	21453.3	27610.6	19227.6
11.26	16002.6	21335.7	27915.1	19205.1
11.28	16001.3	21142.3	27868.3	19490.5
11.3	15945.4	21345.4	27865.9	19266
11.32	15822.5	21107.4	27819.3	19169
11.34	16061.4	21326.3	27563	19469
11.36	16148.2	21460.3	27897.6	19399.3
11.38	16258.5	21660.4	27651	19488
11.4	16123.8	21377.5	27519.5	19200.2
11.42	16389.8	21310.6	27939	19292.2
11.44	16027.2	21388.6	27717.8	19132.3
11.46	16072.4	21348.4	28038.8	19103.5
11.48	16127.5	21496.2	27959.5	19316.6
11.5	16084.5	21309	27387.1	19295.1
11.52	16394.3	21308.5	27784.6	19139.5
11.54	16293.6	21497.9	27521.3	19159.1
11.56	16423.2	21532.2	27924.4	19299.7
11.58	16483.7	21315	27896	19183.5
11.6	16256.2	21303.3	27683.5	19271.8
11.62	16367.7	21066.8	27512.8	19711.4
11.64	16210.6	21086.2	27953.9	19164.2
11.66	16443.2	21034.8	27846.8	18922.4
11.68	16578	21360.9	27835.7	19302.1
11.7	16242.1	21200.2	27612.8	19180.1
11.72	16607.4	21464	27652	19196.5
11.74	16226.8	21386	28076.9	19547.5
11.76	16632.3	21502.3	27620.4	19369.7
11.78	16686.4	21215.8	27691.7	19348.1
11.8	16602.4	21278.8	27797.7	19195.7
11.82	16864.6	21103.3	28151.2	19545.5
11.84	16696	21284.2	27923.9	19332
11.86	16845.9	21131.7	28121.8	19193.7
11.88	16732.6	21218.7	28034	19309.5
11.9	16816.1	21356	27848.9	19129.5
11.92	16694.6	21065.5	27759.2	19282.4
11.94	16977.4	21324.2	28198.5	19115.3
11.96	16970.7	21321.1	28063.8	19320.3
11.98	17041.4	21236.7	27887.3	19218
12	17084.3	21615	27694.3	19339.3
12.02	17106.4	21261.2	28178	19238.8
12.04	17338	21574.2	28051.3	19127.3
12.06	17213.5	21416.6	27935.8	19031.8
12.08	17355.8	21391.4	27575.4	19464.6
12.1	17072.2	21160.9	28200.3	19455.1
12.12	17614.5	21181.1	28306.1	19168.2
12.14	17432.8	21424.8	28498.8	19378.9
12.16	17670.2	21380.2	28144.6	19444.3
12.18	17636.7	21386.2	28042.5	19206.1
12.2	17618.8	21368.1	28463.8	19235.9
12.22	17895.8	21658.4	28285.2	19162.5
12.24	17838.8	21324.6	28257.1	19031.9
12.26	17987.6	20970.5	28484.5	19056.5
12.28	17898	21135.5	28219.8	19452.4
12.3	17794.9	21177.5	28210.1	19249.8
12.32	17933.8	21318.8	28010.2	19285.4
12.34	17796.4	21303.4	28325.5	19639.6
12.36	17962.3	21223.3	28244.5	19124.5
12.38	18220	21312.2	28456.8	19404.7
12.4	18207.1	21463.8	28333.6	19183.8
12.42	18179.5	21283.1	28594.8	19200.8
12.44	18286	21453.3	28357.1	19101.1
12.46	18057.9	21237.2	28138.7	19262.9
12.48	18394.4	21383.6	28191.5	19349.9
12.5	18227	20985.8	28363.8	19156.5
12.52	18266.4	21262	28098.4	19375.9
12.54	18379.7	21323.4	28257.7	19444
12.56	18279.6	21525.4	27878.6	19215.3
12.58	18640.6	21132	28140.8	19204.3
12.6	18253.1	21443.9	28318.6	19122
12.62	18238.3	21603.8	28044.8	19302.7
12.64	18581.2	21025.9	28147.7	19264.2
12.66	18254.3	21392	28124.6	19014
12.68	18223.2	21290.1	28347.3	19413.7
12.7	18202.6	21275.4	28578.6	19049.9
12.72	18105.1	21032.2	28351.2	19297.2
12.74	18021.4	21502.9	27913.5	19341.9
12.76	18119.3	21066.3	27872	19040.1
12.78	17872.2	21228.9	28202.7	19204.2
12.8	17941.4	21091.5	27964.8	19422.1
12.82	17790.8	21236.3	27978.5	19201.9
12.84	18014	21183.3	28073.5	19106.2
12.86	17582.4	21125.2	27898.8	19021
12.88	17746.8	21138.1	27678.1	19225.6
12.9	17493.6	21468.7	27959.9	19268
12.92	17672.5	21402.2	27627.9	18995.9
12.94	17597.3	21182.6	27547.5	19431.5
12.96	17507.7	21692.2	27486.8	19159.7
12.98	17428.8	21290	27865.2	19245.4
13	17228.6	20979.6	27685.4	19112
13.02	17157.4	21140.6	27448.3	19224.9
13.04	17100	21164.1	27362.3	19427.7
13.06	17173.6	21257.5	27411.9	19098
13.08	17169	21253.4	27260.5	19371.4
13.1	17097.2	21007.1	27251.1	19407.6
13.12	17122.1	21260.3	27018.7	19345.4
13.14	17350.9	21269.7	27295.6	19327.9
13.16	17033.9	21577.2	27267.8	19191.7
13.18	17221.9	21440.7	26978.1	19215.9
13.2	16701.7	21320.4	26983.5	19264.1
13.22	16528.2	21139.7	26806.1	19263.8
13.24	16929.4	21333.3	27042.9	19519.5
13.26	16835.1	21210.4	26844.4	19256.4
13.28	16767.5	21269.9	27013.6	19319.1
13.3	16583.2	21328	26806.5	19049.2
13.32	16804.8	21222.8	26446.3	19334.4
13.34	16699.2	21344.5	26761.5	19122.3
13.36	16612.9	21223	26647.3	19133.9
13.38	16636.5	21121.9	26344.7	19375.1
13.4	16593.2	21440.6	26504.2	19212.7
13.42	16643	21187.5	26522.6	18784.7
13.44	16553.6	21080	26558.7	19078.6
13.46	16355	21183.9	26533.6	19241.5
13.48	16476.1	21127.9	26519.8	19272.6
13.5	16562.1	21158.7	26705.2	19392.9
13.52	16311.8	20984.9	26517.1	19325.8
13.54	16364.2	21132.4	26616.9	19141.7
13.56	16187.4	21115.6	26430.7	19299.2
13.58	16503.4	20957.3	26248.1	19524
13.6	16364.1	21247.2	26654.4	19136.9
13.62	16169.7	21136.2	26528.9	19292.7
13.64	16244.8	21234.1	26319.6	19048.2
13.66	16092.5	21101.3	26126.7	19069
13.68	16148.1	21171.5	26126.3	19163.1
13.7	16499.8	21335.1	25914.5	19212.8
13.72	16353.1	21297	25964.8	19387.4
13.74	16203.5	20920.6	25838.9	19442.3
13.76	15910.3	21147.6	26379.3	19214.9
13.78	15918.4	21030	26093.9	19330.5
13.8	16006.3	21375.4	26165.2	19197.9
13.82	16162.1	20842.9	25836.1	19338.5
13.84	15941.3	21026	26036.9	19407.1
13.86	15953	21189.9	25978.4	19123.3
13.88	16269.1	21098.2	25890.9	19342.4
13.9	15947.5	21003	26059	19138.4
13.92	16119.5	21348	26021.1	19429.9
13.94	15917.3	20865.7	26051.6	19357.8
13.96	16291.3	21161.9	25523.5	19096.8
13.98	16080.6	21372	26103	19203
14	16116.4	21239.2	25814.3	19431.7
14.02	16167.9	21308.9	26003.6	19208.2
14.04	15991.3	20997.1	26138.7	19079.3
14.06	16138.1	21121.2	25701	19253
14.08	15811.7	21243.4	25775.2	19209.7
14.1	16064.2	21083.6	25730.9	19079
14.12	16002.8	20899.7	25635.1	19015.3
14.14	15710.1	21123.8	25667.2	19322.4
14.16	15765.8	21212.6	25469.5	19123.8
14.18	15857.1	21144.2	25556.8	19016.4
14.2	15939.6	21185.5	25532.7	19209.9
14.22	15899.8	21389	25506	19093.2
14.24	15868.9	21252.2	25620.8	19358.8
14.26	15993.9	21037	25764	19022
14.28	16028	21298	25975.4	19131.2
14.3	15860.6	21086	25729.7	19251.1
14.32	15901	21229.4	25746.1	19317.7
14.34	15788.6	21144.4	25839	19248.2
14.36	15856.5	20861.9	25637.3	19299
14.38	15830.4	21052.3	25838.1	19092.7
14.4	15846.1	21010.8	25386.9	19171.7
14.42	15759.9	21179.8	25453.5	19104.7
14.44	15806.4	21279.8	25465.2	18979.3
14.46	15933.2	20957	25403.9	19036.3
14.48	15966.7	21069.9	25614.1	19334
14.5	15592.9	21032.9	25404.6	19183.5
14.52	15819.6	21122.4	25423.3	19280.7
14.54	15929	20872.7	25733.5	19119
14.56	15611.9	20988.8	25424.7	19276.9
14.58	15775.6	21024	25644	19387.9
14.6	16055.4	21245.4	25674.9	19162.4
14.62	15941.6	21233.5	25476.9	19100
14.64	15968.5	21166.3	25523.1	19033.1
14.66	15732.8	20869.4	25248.3	19096.9
14.68	15881.5	20994.5	25295.6	19181
14.7	15843.1	21182.3	25408.8	19283.6
14.72	15908.8	20772.2	25224.6	19236.6
14.74	15844.2	21016.8	25492.2	18971.7
14.76	15999.8	21039.1	25590.8	19058.2
14.78	15890.8	21047.2	25169.7	19291.4
14.8	15797.5	21103.2	25299.2	19154.8
14.82	16084.6	20964.7	25394.6	19034.7
14.84	15827.2	21054.9	25221.9	19138.7
14.86	15667.4	21203.6	25526.7	19440.2
14.88	15651	20915.3	25198.9	19374.1
14.9	15829.5	21143.2	25636	19266.3
14.92	15678.3	21287.5	25518.4	19128.2
14.94	15860.4	20988.5	25368.7	19030.8
14.96	15828	20972.3	25613.6	19107.4
14.98	15609	21032.3	25385.2	19097.9
15	15933.4	21268.3	25297.7	19429.5
15.02	15952.1	21281.7	25222.7	19345.7
15.04	15980.8	21031.2	25341.1	19034.7
15.06	15857.5	21261.5	25400.9	19034.4
15.08	15708.3	21201.6	25366.3	19393.7
15.1	16158.7	21511.3	25502	19224.2
15.12	15897.6	21046.6	25385.7	19144.6
15.14	15684.6	21205.5	24998.1	19038
15.16	15880.9	21218.7	25285.2	18828.2
15.18	16026.2	21201.1	25482.3	18895.5
15.2	15833.5	21136.2	25153	19002.2
15.22	15889.7	21178.8	25270.3	19141.6
15.24	15713.2	20835	25470	19187.8
15.26	15855.3	21036.2	25152.9	19347.7
15.28	15784.7	20931.8	25121.6	19524.6
15.3	15849.8	21134.7	25287.7	19152.8
15.32	15844.8	21015	25203.2	18990.8
15.34	15841.5	21156.5	25218.5	18991.4
15.36	16145.1	21186.4	25151	19015
15.38	15928.7	21162.4	25124.9	18990.8
15.4	15959.2	21211.8	25198.8	19037.2
15.42	16016.4	20976.3	25319	19079.7
15.44	15897	21286.2	25561.1	19217.7
15.46	15934.8	20816.1	24947.8	19088.1
15.48	15753.1	20995.3	25454.1	19074.7
15.5	15904.6	21053.3	25116.4	19057.1
15.52	15874.9	21052.1	25158.6	18743.5
15.54	16047.6	20966.8	25286.8	19272.9
15.56	16021.2	21008.1	25121.1	19179.7
15.58	16015.6	20970.2	25319.1	18908.3
15.6	15991.1	21126.5	25086.6	18774
15.62	15966	20833.8	25275.1	19244.5
15.64	15981	21037.6	25160.4	19211.3
15.66	15961.8	21121.5	25146.4	19058.6
15.68	15869.9	20972.8	25092	18832.7
15.7	15927.7	20871.4	25255.2	19158.3
15.72	16003.5	21163.3	25297.4	18865.7
15.74	16181.5	21042.4	25033.8	18883.2
15.76	16265.3	21259.6	25457	19335.7
15.78	16399.2	20819.3	25446.1	19218.4
15.8	16067.1	21080.6	25275.7	19245.1
15.82	16159.6	21015.1	24976	19309.5
15.84	16155.8	20992.4	25240.3	19060.7
15.86	16123.6	20952.4	25004.4	19291.9
15.88	16215.7	20856.3	25030.8	19091.8
15.9	16340.5	20934.3	25238.1	18998.5
15.92	16021.8	21021.5	25313.9	19274.3
15.94	15921.1	21233.1	24956.1	18942.4
15.96	16040.8	21039	25270.5	19263.4
15.98	16258.3	21228.5	25521.4	19366
16	16089.6	20963.1	24991.1	19448.7
16.02	16362.6	21137.3	25364.6	19183.9
16.04	16203.8	21003.4	25211.1	19275
16.06	16213.2	21135.1	25349.3	19133.1
16.08	16169.4	20872.6	25266.6	19380.7
16.1	16033.6	21022.2	25376.4	19087.6
16.12	16167.2	21307.9	24895.9	19303.8
16.14	15685.6	20983.5	25130.7	19178.3
16.16	16289.4	20797.2	25305.8	19055.7
16.18	16195.9	20912.7	25152.6	19255.4
16.2	16271.9	20907.3	25011.9	19239
16.22	16500.1	20664.6	25372.8	19185.6
16.24	16297.2	20967.9	25381.9	18947.2
16.26	16249	21001.9	25106.9	18831.5
16.28	16400.8	21124.4	25085.5	19065.6
16.3	16383.4	21010.3	25064.7	19136.2
16.32	16486.8	20827.6	25132.6	19200.9
16.34	16247.8	20844.5	24962.1	19125.2
16.36	16282.1	20682.5	25247.8	19053.7
16.38	16232.6	20851.1	25363.5	19146.1
16.4	16125.4	20857.9	25300.5	19034.2
16.42	16430.5	21060	25165.2	19095.3
16.44	16430.5	20915.2	25165.4	19130.8
16.46	16447	21189.4	25136.7	19214.8
16.48	16429	20909.2	25187.3	19253.7
16.5	16320.5	21011.8	25029.7	19237.3
16.52	16472.8	21126.1	24954.5	19098.1
16.54	16470	21169.6	25305.8	19263.8
16.56	16310.3	20991.4	25145.7	19351.3
16.58	16330	21055.8	25130.7	18999.6
16.6	16437.3	20895	25260.6	19063.9
16.62	16483.2	20933.5	25109.2	18826.2
16.64	16648.4	20980.2	25056	19034
16.66	16447.2	20986.7	25425	19129.4
16.68	16561.9	21003.7	25261	19122.1
16.7	16657.1	21163.4	25451.7	19366.1
16.72	16573.2	21214.5	25040.6	19100.9
16.74	16600.5	20963.6	25078.1	19173
16.76	16810.7	21197.1	25211	19041.5
16.78	16541.2	21018.9	25168.8	18755.8
16.8	16643.6	21327.5	24977.2	19124
16.82	16769.1	21076.4	25387.1	19059.6
16.84	16490.6	20916	25125.6	19211.7
16.86	16645.6	21230.3	25284.5	19187.3
16.88	16650.6	20927.9	25106.2	18999.1
16.9	16834.4	20923.9	25262.2	19100.4
16.92	16499.9	21036.8	24982.8	18959.1
16.94	16761	20702	25361.4	19238.2
16.96	16934.4	20922.3	25382.1	19138.7
16.98	16871	20767.6	25281.2	19347
17	16708	21136.9	25354.4	19098.4
17.02	16979.1	20900.8	24999.6	19046.2
17.04	16799.1	21059.1	25468.2	19113.4
17.06	17081.5	20992.8	25533.5	19121.5
17.08	16994	20939.8	25350	18985.8
17.1	17134.7	21077.4	25305.4	19213.6
17.12	16929.2	20967.1	25187	19364.6
17.14	17135.9	20970.7	25227.3	19114.9
17.16	17092.4	21219.7	25240.2	18983.5
17.18	17076.3	20858.1	25521.3	19000.8
17.2	17066.8	21028.7	25259.6	19211
17.22	17218.7	21039.4	25282.2	18977.1
17.24	17361.3	20917.9	25616.1	19432.3
17.26	17368.1	20916.4	25463.1	19090.5
17.28	17219	20784	25524.3	19194.4
17.3	17202	21137.5	25654.3	19001.3
17.32	17277.8	20848.5	25501.3	19392.1
17.34	17609.8	21073.7	25374.7	19204.4
17.36	17489.3	20917	25908.8	19220
17.38	17235.1	21051.9	25536.8	19228.7
17.4	17739.1	20870.8	25646.4	19129.8
17.42	17563.1	20894.8	25482.5	19204.8
17.44	17583.7	20905.7	25603.7	19204
17.46	17810.9	21184.4	25436.5	18979.7
17.48	17633	21032.4	25816.2	19295.8
17.5	17914.9	20983.2	25577.4	18989.9
17.52	17724.3	20969.5	25778.8	19116.7
17.54	17925.4	21130.6	25785.4	19232.5
17.56	17770.3	21138	26037.9	19102.6
17.58	17795.3	20889.2	25738.7	19479.4
17.6	17735.5	21075.1	25773.6	19206.3
17.62	17672.5	21052.5	25967	19248.5
17.64	17903.9	21247.5	25713.3	19200.3
17.66	17849.5	20858.4	26117.8	19337.4
17.68	17731.7	21078.7	25988	19008
17.7	17908.2	20831.1	25996.7	19120.3
17.72	18046.9	21024.9	26323.3	19431.3
17.74	18032.3	20810.9	26112.3	19076.1
17.76	17925.7	21076.1	25928.3	19265.2
17.78	18010.5	21070.4	25708.8	19055.3
17.8	18251.6	20674.4	25909.7	19374.2
17.82	18377.8	21072	25945	19239.1
17.84	18231.9	20987	25840.5	19253.9
17.86	18013.9	20970.5	25993.1	19416.3
17.88	18206.7	20792.1	26100.8	19120.5
17.9	18031.6	21172.2	25930.9	19176
17.92	18216.9	21091.8	26258	18953.3
17.94	17954.3	20959.9	26336.5	19423
17.96	18187.7	20932.8	26086.8	19380.7
17.98	17974.6	20811.2	26286.3	19291
18	18104.9	21110.1	26175.6	19415.9
18.02	18246.5	20884.7	26227.9	19140.6
18.04	18003.7	21099.9	25889.5	19270
18.06	18085.1	21198.7	25870.8	19679.6
18.08	17902.2	20982.5	26106	19269.8
18.1	17942.8	21075.9	26191.7	19528.9
18.12	17736.9	20851.3	26381.8	19217.6
18.14	17963.3	20939.2	26151	19403.7
18.16	17935.4	21010.2	26012.9	19344.4
18.18	17798.1	21113.1	25867.9	19528.2
18.2	17822.4	20792.2	26210.8	19396.9
18.22	17850.9	20987.1	25794.4	19312.4
18.24	17733.1	20929.6	26150.6	19463.8
18.26	17654	20616.5	25941.6	19330.5
18.28	17904.8	20860.8	26223.1	19397.6
18.3	17612.8	20973.1	25885.2	19386.9
18.32	17826.9	20782.9	25885.8	19391.5
18.34	18029	20710.6	25848.4	19365.4
18.36	17585.9	21388.5	26023	19265.1
18.38	17746.5	21147.3	26185.5	19292
18.4	17524.3	21047.1	26084.1	19326
18.42	17550.7	20924.4	26023	19535.4
18.44	17469.4	21242.5	26099.9	19171.5
18.46	17479	21003.7	25894	19242.2
18.48	17592.8	21131.4	25711.1	19315.6
18.5	17494.3	20782.3	25944.6	19340.8
18.52	17453	21173.5	25776.7	19676.6
18.54	17541.2	21275.8	25794.5	19383.5
18.56	17391.1	20956.6	25637.3	19519.3
18.58	17363.7	20955.3	25840.4	19491.1
18.6	17088.6	20976.9	26053.3	19453.9
18.62	17147.1	20862.3	25420.8	19333.1
18.64	17191.5	21130	25642.9	19187.8
18.66	17268.7	21150.2	25589.4	19621.9
18.68	17434.6	21015.7	25893.8	19813.7
18.7	17215.7	20805.9	25584.6	19300
18.72	17093.6	21210.8	25690.6	19533.9
18.74	17139.1	21090	25519.7	19506
18.76	16931.9	21080	25787	19438.9
18.78	17087	21128.2	25554.5	19540.7
18.8	17118.3	20922	25672.3	19316.6
18.82	16843.4	21048.8	25666	19152.4
18.84	17068.2	21044.3	25776.2	19429.9
18.86	17127.7	20828.8	25448.6	19626.9
18.88	16996.6	21063.6	25451.6	19423.6
18.9	16921.2	21014.3	25514.3	19535.5
18.92	17168.1	21206.1	25410.2	19403.9
18.94	16943.2	21024	25237	19566.4
18.96	17004.1	20943.1	25431.2	19393.3
18.98	16854.9	21130.3	25441.6	19669.2
19	16804.1	21298.2	25539	19578.4
19.02	16825.7	21010.9	25719.6	19777.2
19.04	16812.7	21197.3	25430.8	19529.9
19.06	16773.8	21081.3	25456.2	19453.3
19.08	16972.7	21042.7	25690.8	19717.8
19.1	16795.2	21137.3	25266.9	19806.5
19.12	16776.2	20748.2	25407.5	19515.7
19.14	16732.7	21092.4	25426	19567.5
19.16	16686.8	21220.8	25616.2	19612.4
19.18	16872.3	21300.3	25356.8	19532.5
19.2	16609.3	21024.4	25524.9	19596.6
19.22	16646.2	21198.3	25323.6	19837
19.24	16616.2	21209.5	25435.6	19482.2
19.26	16659.9	21092.7	25445.7	19685
19.28	16535.2	21063.5	25446.5	19671.4
19.3	16615.7	21142.8	25245.9	19768
19.32	16676.9	20867.4	25553	19649.4
19.34	16504.5	21012.2	25185.5	19701.7
19.36	16763.4	21177.8	25070.4	19728.8
19.38	16449.8	20781.8	25577.1	19834.7
19.4	16597.9	21210.2	25478.7	19798.7
19.42	16540.2	21271	25511.4	19752.3
19.44	16524	21161.9	25212.8	19572.2
19.46	16530.3	21385.9	25524.7	19788.6
19.48	16447.7	21142	25294.2	19736.8
19.5	16681.6	20936.2	25189.6	19853.3
19.52	16586.1	21216.7	25540.8	19686.6
19.54	16376.1	21339.7	25788.3	19981.9
19.56	16836.8	20965.9	25307.3	19809.4
19.58	16388.8	21207	25421.5	19929.7
19.6	16262.7	21286.1	25692.9	19949.2
19.62	16578.6	21353.5	25332.2	19869.1
19.64	16468.5	21190.3	25414.4	19728.8
19.66	16585.2	21011.8	25156.6	19805
19.68	16407.2	21075.6	25354	19891.6
19.7	16560.4	21111.9	25462.8	20072.4
19.72	16125.2	21287	25080.3	19816.4
19.74	16368.8	21046.5	25215.1	19915.9
19.76	16310.8	21361.8	25240.2	20195.1
19.78	16317.4	21433.6	25600.4	19893.5
19.8	16509.3	21414.8	25094	19751.4
19.82	16229.8	21206	25030.7	19980
19.84	16202	21207.9	25621.4	19933.1
19.86	16360.5	21339.4	25345.6	19995
19.88	16297.9	21480.9	25614.1	20006.6
19.9	16309.4	21403.2	25311	20103.3
19.92	16249.6	21374.7	25184.8	20163.6
19.94	16478.7	21445.1	25295.4	19856.4
19.96	16333.7	21204.1	25342.6	20183.8
19.98	16253.5	21613.2	25243.4	20254
20	16414.5	21602.7	25277.3	20109
20.02	16130.7	21450.8	25361.4	20213.8
20.04	16212.2	21515.5	25831.7	20188.7
20.06	16197.2	21655.8	25575	20506.8
20.08	16231.5	21577.3	25584.5	20242.4
20.1	16110.5	21261.5	25513	20357.9
20.12	16029.4	21480.4	25457	20525.8
20.14	16244.8	21547	25449.6	20346
20.16	16219.5	21597.9	25243.9	20328.5
20.18	16147.2	21592.7	25520	20071
20.2	16246.5	21496.2	25374.2	20655.6
20.22	16232.9	21640.6	25398.2	20482.9
20.24	16209.3	21555.3	25379.8	20444
20.26	16213.5	21712.2	25685.4	20490.6
20.28	16445.6	21527.7	25279.3	20424.1
20.3	16325.6	21450.6	25318.9	20500.8
20.32	15886.9	21545.6	25196.4	20466
20.34	16299.7	21471.6	25560.3	20409.1
20.36	16359.2	21436.8	25602.7	20512.9
20.38	16119.1	21505.4	25410.8	20571.2
20.4	16217.4	21625.8	25234.9	20721.9
20.42	16168.5	21633	25298.7	20749.8
20.44	16393.6	21520.2	25571.3	20817.6
20.46	16242.8	21654.3	25432.5	20542.3
20.48	16130.3	21716	25244.8	20511.2
20.5	15949.3	21559.3	25473.2	20844.3
20.52	16277	21792.8	25539	20645
20.54	16110.6	21660.1	25322.7	20538.3
20.56	16205.3	21539.9	25494.5	20726.6
20.58	15916.5	21840.1	25261.5	20810
20.6	16318.2	21663.4	25511.8	20970.8
20.62	16088	21346.6	25367.3	20876.5
20.64	16112.7	21783.6	25646.5	20798.1
20.66	16194.4	21538.6	25515.8	20875.2
20.68	16373.9	21724	25493.4	20922.7
20.7	15995.7	21545.8	25583.2	21154
20.72	16280.8	21572.6	25427.2	20937.6
20.74	15969.6	21574	25555.2	21107
20.76	16100.5	21641.1	25297.9	20908.8
20.78	16431.3	21653.1	25602.3	21344.2
20.8	16014.1	21624.4	25621.4	21039.3
20.82	15996.1	21921.4	25558.5	21363.2
20.84	16173	21780.5	25529.6	21226.4
20.86	16386.4	21805.8	25555.1	21280.4
20.88	16648.6	21802.5	25430	21286.4
20.9	16279.2	21731.8	25613.1	21456.3
20.92	16188.7	21472.7	25474.8	21341.2
20.94	16158.3	21695.6	25603.2	21461.9
20.96	16070.3	21732.2	25245.7	21064
20.98	16667.7	21688.6	25530.4	21495.8
21	16036.7	21419.6	25665.2	21386.2
21.02	16011.1	21708.7	25561.7	21362.6
21.04	16067.5	21630.8	25260.4	21374.2
21.06	16352.3	21604.8	25431.4	21401.4
21.08	16318.4	21706.4	25646.6	21819.9
21.1	16214.1	21632.7	25427.3	21684.8
21.12	16173.1	21327.8	25801.8	21641.8
21.14	16312.5	21889.6	25724.8	21900
21.16	16067.6	21626.4	25337.9	21640
21.18	16375	21609	25620.7	21763.6
21.2	16214.7	21393.9	25392.7	21866.8
21.22	16180.2	21489.7	25491.5	21805.1
21.24	16256.7	21707.4	25480	21927.7
21.26	16204	21570	25565.2	21864.9
21.28	16191.6	21737.3	25141.9	21757.2
21.3	15972.1	21425.7	25526	21775.8
21.32	16184.5	21421	25533.2	22043.7
21.34	16053	22105.2	25626.2	22070.9
21.36	16070.7	21417.6	25243.3	21892.7
21.38	16140.8	21539.4	25458.9	22132.9
21.4	16323.8	21698.2	25454.2	22063.1
21.42	16248.2	21574	25179.1	21688.1
21.44	15982.2	21658.9	25773	22122.8
21.46	16127	21505.6	25655.7	22112.9
21.48	16229.3	21512.8	25733.5	22041.1
21.5	16419.9	21513.8	25642.4	22157.4
21.52	16242.1	21394.1	25565	22004.3
21.54	16321.8	21599.7	25303.7	22072.6
21.56	16096.9	21698.3	25799.9	22257
21.58	16271.7	21589.5	25468.5	22498
21.6	16166.5	21652	25870.9	22015.4
21.62	16060.7	21671	25875.5	22304.3
21.64	16280.9	21495.3	25825	22113.6
21.66	16232.9	21584.6	25465.3	22246.8
21.68	15999	21624.7	25815.2	22411.7
21.7	16275	21734.4	25893	22236.9
21.72	16216.9	21718.9	25383.1	22534
21.74	16208.2	21685	25727	22450.8
21.76	16281.2	21595.1	25878.3	22248.1
21.78	16188.6	21359.1	25793.6	22483
21.8	16305.3	21513.5	25460.3	22572.2
21.82	16369.1	21644.2	25688	22646.1
21.84	16286.4	21591	25566.5	22572.4
21.86	16332.2	21962.3	25531.3	22453.3
21.88	16228	21511.3	25507.5	22626.4
21.9	16304.8	21432.9	25522.2	22648.1
21.92	16327.4	21630.3	25425.6	22602.6
21.94	16339.4	21755.6	25810.2	22647.5
21.96	16153.4	21337.4	25433	22598.8
21.98	16402.9	21747.4	25562.7	22577.8
22	16236.8	21438.8	25433.2	22514.1
22.02	16369.1	21874.1	25627.4	22686.4
22.04	16481.1	21511.9	25784	22811.7
22.06	16414.9	21360.7	25625.4	22817.6
22.08	16338.4	21594.7	26143.2	22679.2
22.1	16477.3	21853.2	25896.8	22566.8
22.12	16289.3	21567.6	25845.2	22803.4
22.14	16291.8	21670.7	25865.7	22611.8
22.16	16218.3	21661.6	25764.3	22198.9
22.18	16360.1	21522.7	25560.7	22983.5
22.2	16497.2	21731	25662.1	22703.6
22.22	16471.7	21902.4	25670.5	22540.3
22.24	16371.6	21672	25677.8	22661.8
22.26	16146	21413	25824.8	22676.9
22.28	16170.3	21683.6	25380.5	22452.5
22.3	16438	21725.6	25757.5	22345.1
22.32	16273.5	21712.4	25574.8	22587.8
22.34	16112.9	21933.8	25815.8	22914
22.36	16117.7	21872.2	25893	22507.7
22.38	16175.3	21831.4	25619.1	22398.1
22.4	16313.2	21646.5	25916	22390.7
22.42	16036.1	21707.4	25738	22831.4
22.44	16425.8	21646.8	25643.6	22326
22.46	16185	21878.4	25806.9	22236.4
22.48	16233.3	21743.1	25696.4	22443.2
22.5	16323.2	21974.7	25744.5	22335.5
22.52	16204.3	22007.2	25717	22735.5
22.54	16081	21828.2	25476.5	22404.1
22.56	16256.5	21676.4	25652.8	22833.2
22.58	16123.9	21963.1	25331.8	22495
22.6	16445.1	21897.4	25562.6	22584.8
22.62	16280.6	22096.6	25813.2	22363.6
22.64	16043.8	22014.7	25492	22632.2
22.66	16332.5	21722.7	25533.3	22323.4
22.68	16292	21800.9	25354.8	22150.8
22.7	16319.7	21954.6	25799	22351
22.72	16017.1	21793.8	25696.4	22307.5
22.74	16207.4	21971	25611.8	22576
22.76	16160.6	21886.1	25702.6	22669.4
22.78	16382.3	21936.3	25651.8	22471.5
22.8	16003.1	22124.4	25366.7	22522.8
22.82	16445.6	22138.2	25649.7	22130.3
22.84	16171.6	21761.1	25378.6	22425.7
22.86	15835.7	22065	25354	22217.1
22.88	16161.1	21683	25646.8	22249.1
22.9	16206	21821.6	25626.1	21932.4
22.92	16071.2	21894.1	25664.6	22048.7
22.94	16167.8	21859.6	25491.3	22161
22.96	16248.5	22339.8	25440.4	22111.8
22.98	16190.1	21706.6	25450.7	22120.7
23	16149.9	21773	25215.6	22053.2
23.02	16000.3	22172.8	25556.8	22287.8
23.04	16232.1	21922.4	25232.5	22482.2
23.06	15859.6	21889.1	25332.7	22136.1
23.08	16268.5	21973.2	25555.7	22145.6
23.1	15974.1	21910.5	25446	22151.3
23.12	16158.1	22123.5	25332.7	22102
23.14	16085.3	22203.7	25203.2	22108
23.16	16224	22056.2	25490.8	22067.5
23.18	16075.5	22062.7	25236.5	21831.4
23.2	16139.8	21856	25444.3	22091.6
23.22	16109.2	22011.4	25283	22276.3
23.24	15905.6	22121.2	25111.5	21828.3
23.26	16107.5	21903.4	25286.1	22072.7
23.28	15927.8	22039.3	25316	21951.1
23.3	15922.4	22385.2	25413.1	21967.7
23.32	16041.8	22065.1	25493	21653.7
23.34	15948.9	22098.7	25284.5	21797.8
23.36	16122.2	22241.8	25177.9	21846.7
23.38	15996.7	22352.1	25152.4	21667.1
23.4	16056.7	22262.7	25188.2	21685.2
23.42	16272.2	22193.3	25544	21870.2
23.44	16023	22172.4	25518.9	21783.2
23.46	15962.4	21974.8	25324.8	22167.1
23.48	16157.2	22203.1	25194.7	21682.8
23.5	15886.2	22310.7	25020.8	21921.4
23.52	16265.5	22325.6	25055.1	21748.7
23.54	16021.4	22218	25220.1	21791.8
23.56	15836	22450.5	25169.9	21476.4
23.58	15785.3	22080.8	25329.6	21711.6
23.6	16053	22286.2	25252.7	22152.7
23.62	15925.4	22138.2	24987.2	21666.2
23.64	15861.6	22357.1	25191.7	21740.5
23.66	15786.5	22217.5	25172.8	21381.6
23.68	15975.2	22061.1	25200.9	21703.3
23.7	16050.4	22285.6	25175.9	21655.8
23.72	16061.3	22480.4	25025.1	21497.1
23.74	16070.5	22650.1	25247.2	21652.4
23.76	15901	22420.6	25114.4	21730.7
23.78	16093.3	22108.4	25210.6	21624.3
23.8	15985.7	22464.5	25135.2	21561.3
23.82	15893	22420	25043.7	21496.3
23.84	15943.4	22561.5	25039.6	21728.2
23.86	15901.1	22534	24911.5	21609.3
23.88	16127.5	22610.1	25038.7	21732.9
23.9	15777.7	22517.7	25093.3	21378.3
23.92	16104.7	22518.4	24949.7	21574.9
23.94	16153.7	22570.4	25004.6	21434.1
23.96	16044.3	22751	24802.5	21466.9
23.98	16134.3	22188.2	25109.8	21606.4
24	16083.4	22598.5	24837	21662.4
24.02	15869.5	22863.9	24626.6	21281.5
24.04	15840	22455.8	25178.8	21637.7
24.06	15980.7	22784.5	24860.1	21616.6
24.08	16000	22483.1	24965.8	21505.3
24.1	16135.8	22516	24998.2	21216.7
24.12	15957.1	22403.8	24899.3	21298.1
24.14	16182.4	22704.4	25293.1	21573.2
24.16	16026.3	22454.3	25228.1	21306.3
24.18	16001.3	22457	25280.2	21417.5
24.2	16160.2	22534.8	24817.2	21290.8
24.22	15892.5	22517	25050.3	21348.5
24.24	15833.6	22532.1	24933.5	21377.7
24.26	15940.4	22464.3	25123.4	21468.9
24.28	16124.8	22611.4	24853.9	21438.7
24.3	15887.2	22559.5	25125.8	21471.8
24.32	16047.6	22590.7	24900.1	21243.8
24.34	16131.1	22613.6	24822.5	21292.1
24.36	15991.4	22698.6	24820.9	21434.3
24.38	16322.3	22566.3	24945.1	21406.6
24.4	16177.1	22861.4	24895.6	21409.5
24.42	15956.5	22520	24834	21497.7
24.44	15947.9	22581	25075	21133.8
24.46	15970.3	22882.7	25345.1	21120.6
24.48	16092.2	22812.5	24993.2	21244
24.5	16139.1	22822	24833.7	21240
24.52	16025.6	22997.8	25203.6	21238.5
24.54	16117.5	22853	24768.4	21324.4
24.56	16271.1	22868.3	24736.8	21117.3
24.58	15924.9	22915.7	25020.6	20799.4
24.6	16138.9	22558.5	24830.5	21107.2
24.62	16102.8	22528.8	25013.8	21208.4
24.64	15861.3	23072.2	24787.1	21163.3
24.66	15906.7	22949.7	25076.8	20990.7
24.68	16085.5	22875.8	24880.7	21258.3
24.7	16145.2	22782.7	24849.7	21006.9
24.72	16124.5	22869.1	24866.3	21351.5
24.74	15941.9	23078.8	24630.3	21013.4
24.76	16094.5	23138.3	25221.2	21095.5
24.78	16110.2	23143.2	24879.6	21147.8
24.8	15839.6	22904.9	24925	21305.5
24.82	16216.8	23157.1	24734.6	21011.7
24.84	16262	22965.8	24888.7	21125.9
24.86	16083.2	22913.6	25103.9	21016.4
24.88	16127.9	23074.9	24963.3	20807.2
24.9	16359.7	23221.4	24728.8	20999.6
24.92	16016.3	23122.5	25271.2	21054
24.94	16146.3	22999.2	24954.2	20815.6
24.96	16369.5	23109.9	25144.6	21043.1
24.98	16212.7	23137.2	24897.6	21151.8
25	16243.6	23273.7	24819.3	20913.7
25.02	16092.4	23026.4	24907.5	21115
25.04	16173.9	23210.9	24894.4	20752.3
25.06	16071	23222.8	24927.9	20973.2
25.08	16121.8	22937.3	24899.7	21016.2
25.1	16400.7	23392.7	24863.9	20754.5
25.12	16022.3	22949.3	24993.9	20912.4
25.14	16246.2	23062.5	25044.2	20837.9
25.16	16107.1	22989.5	24868	20930
25.18	15956.9	23112.7	24927.1	20640.6
25.2	16294	23065.1	24601.8	21014.7
25.22	16032.1	22806.3	25094.3	20700.6
25.24	15991	23024.7	25267	20725.9
25.26	16337.6	22943.9	24934.4	20725.7
25.28	16175	23211.4	24934.3	21066.6
25.3	15745.4	23224.6	25076.8	20503
25.32	16277.9	23333.7	24770	20838.1
25.34	16040.4	23172.3	24459.3	20718.5
25.36	16065.9	23032.6	24672.5	20658.4
25.38	16262	23192.3	24703.7	21031.3
25.4	16084.1	23175.8	24620.9	20601.5
25.42	16194.4	23195.7	24661.1	20779.9
25.44	15991.3	23091.4	24534.2	20827.9
25.46	16161.4	23030.8	24725.8	20838
25.48	16189.5	23429.6	24913.7	20583.7
25.5	16045.5	23230.5	24634.3	20657.5
25.52	16187.8	23283.3	24669.7	20410.5
25.54	16001.7	23236.2	24702.4	20755
25.56	15993	23512.9	24269.4	20776.3
25.58	15887.6	23314.2	24701.7	20725
25.6	16154.1	23080.6	24715.3	20904.7
25.62	15986.8	23126.9	24656.5	20947.3
25.64	16017.6	23223.5	24849	20546.6
25.66	16191.2	23042.5	24502.5	21038.4
25.68	16159.4	23481	24711.5	20647.3
25.7	16182.5	23061.3	24775.3	20714.9
25.72	16342.9	23043.3	24859.7	20627.3
25.74	16230	23262.9	24513.7	20814.6
25.76	16275.1	23262.8	24812.2	20730.6
25.78	15979.2	23317.5	24577.6	20833.4
25.8	16151	23230.9	24526.9	20724.1
25.82	15839.5	23484.9	24937.8	20436.9
25.84	16224.8	23089.3	24763.3	20783.6
25.86	15824	23297	24735.8	20661.1
25.88	16256	23662.1	24454.8	20848.6
25.9	16116	23328.8	24550	20518.6
25.92	16246	23332.5	24290.3	20750.3
25.94	16038.6	23228.6	24650.5	20443.7
25.96	16079.2	23237.1	24882.5	20365.9
25.98	15920.2	23608.7	24671.5	20569.6
26	16137.4	23381.8	24569.8	20306
26.02	16322.1	23369.2	24294.3	20535.1
26.04	16088.2	23203.6	24313.5	20703
26.06	16386.1	23442.1	24495.1	20812.5
26.08	16175.8	23406.1	24592.5	20739.6
26.1	16096.9	23404.2	24327.4	20526.9
26.12	16083.7	23308.5	24651.8	20686.2
26.14	16051.3	23333.2	24200.8	20923.5
26.16	16230.9	23794	24207.3	20527.6
26.18	16087.7	23357.2	24687.7	20650.3
26.2	15802.1	23581.4	24690.8	20727.4
26.22	15986.2	23410.6	24409.7	20604.4
26.24	15860	23615.4	24356.1	20450.7
26.26	16246	23483.2	24378.4	20776.5
26.28	16393.5	23362.1	24562.7	20434.4
26.3	16367	23421.4	24395	20628.9
26.32	16049.2	23375.9	24469	20454
26.34	15929.6	23537.6	24681.3	20879
26.36	16061.2	23604	24380.4	20733
26.38	16221.3	23572.1	24618.7	20438.6
26.4	16278.9	23491.8	24471	20701.1
26.42	16035.8	23387.8	24509.6	20646.8
26.44	16103.6	23509.9	24592.5	20559.4
26.46	16384.8	23506.2	24759.3	20281.1
26.48	16203	23896.8	24656.4	20508.5
26.5	16141.6	23604.5	24639.3	20457.8
26.52	16272.4	23786	24176.1	20465.4
26.54	16232.2	23644.9	24361	20519.2
26.56	15831.2	23852.4	24346.2	20269.1
26.58	15976.7	23995.6	24516	20499.7
26.6	16128.4	23579.1	24403	20454.8
26.62	16289.2	23790.1	24299.6	20560.3
26.64	16171	23479.1	24470.7	20373.5
26.66	16196.9	23390.6	24319.1	20452.7
26.68	16086.9	23760.5	24143.9	20296.5
26.7	16106.6	23500.3	24217.6	20511
26.72	16211.9	23683.7	24361.3	20183.1
26.74	16194	23690.5	24522.5	20459.9
26.76	16230.6	23595.8	24543.2	20489.5
26.78	16240.4	23899	24533.5	20522.4
26.8	16044.6	23836.3	24442.6	20425.3
26.82	16304.4	23748.8	24295.4	20467
26.84	16138.4	23637.4	24372.9	20416.3
26.86	16139.1	23698.4	24349.3	20198.4
26.88	16238	23582.7	24400.2	20269.3
26.9	16097.3	23847.5	24637.1	20460.3
26.92	16094.1	24198.5	24504	20501.8
26.94	16398.8	23639.3	24620.3	20512.3
26.96	16226.7	23848.6	24260.2	20340.7
26.98	16339.7	23863.6	24290.7	20355.9
27	16309.6	23860	24727.7	20199.6
27.02	16424.3	23853.8	24333.6	20341.8
27.04	16337.8	23802.8	24367.7	20595.4
27.06	16129.3	23919.4	24477	20187.3
27.08	16393.7	23973.9	24287.9	20218.8
27.1	16296.4	24067.3	24532.9	20553.4
27.12	16316.5	23963.9	24266.8	20590.7
27.14	16347.1	24047.2	24735.8	20457
27.16	16324.4	23922	24345.8	20491.1
27.18	16388	23856.6	24304.4	20555.1
27.2	16476.6	23463.9	24472.5	20489.7
27.22	16412.5	23834.8	24776.8	20191.5
27.24	16414.3	23808.8	24483.7	20283.4
27.26	16492.7	23642.9	24662.9	20092.7
27.28	16542.2	23900.3	24365.8	20357.8
27.3	16599.6	23822.5	24718.6	20407.4
27.32	16473	24217	24508.7	20275.9
27.34	16712.2	23888.5	24465.8	20603.7
27.36	16464.9	24315.9	24697.5	20366.4
27.38	16864.5	24139.3	24674.4	20279.3
27.4	16748.7	23921.9	24305.6	20217.8
27.42	16420.4	23935.5	24434.8	20066.2
27.44	16744.6	24133.5	24630	20377.5
27.46	16699.6	24527.1	24540.9	20469.1
27.48	16643.7	24101.7	24401	20303
27.5	16775.2	24011	24413.8	20275.7
27.52	16721.6	24367.7	24570.9	20260.3
27.54	16717.5	24444.6	24458.9	20433.5
27.56	16871.9	24295.3	24368.4	20681.4
27.58	16900.7	24080	24681.2	20096.3
27.6	16868.1	24186	24615.4	20518.8
27.62	17077	24467.8	24375.6	20535.3
27.64	16910.8	24476.9	24699.3	20367
27.66	16874.9	24419.4	24329.5	20584.2
27.68	16869.8	24245.3	24509.4	20067
27.7	16881.2	24171.4	24687.5	20326.1
27.72	16824.8	24238.7	24641.9	20404.2
27.74	16947.4	24353.6	24610.3	20346.8
27.76	17136.9	24719.8	24528.3	20444.9
27.78	17086	24388.5	24837.7	20403.9
27.8	16786.5	24396	24662.3	20554
27.82	17127.8	24581.4	24598.6	20286.2
27.84	17086.8	24739.6	24544.5	20333.1
27.86	16825.5	24254.1	24746.4	20582.4
27.88	17179.8	24529.5	24595.9	20298
27.9	17252.1	24461.3	24677.4	20083.1
27.92	17159	24428.3	24593.6	20552.6
27.94	17301.4	24556.1	24879.9	20372
27.96	17287.5	24767.6	24776.9	20432.1
27.98	17247.6	24407.3	24542.2	20309.9
28	17218.7	24781.4	24686.4	20375.7
28.02	17254.7	24601.4	24910.2	20447.9
28.04	17273.1	24418.4	24777.2	20290
28.06	17317.2	24426.5	24844.7	20346.5
28.08	17601.8	24612.8	24865.8	20233.5
28.1	17291.5	24639	24869.5	20132.6
28.12	17447.7	24340.5	24851.6	20335.4
28.14	17266.9	24756.1	25155.5	20729
28.16	17441.6	24883	24720.4	20654.5
28.18	17385	24660.3	24937.3	20524.6
28.2	17586.2	24823.7	24668	20420.5
28.22	17572.8	24781	24759.5	20511.5
28.24	17509.6	25087.8	24761.3	20123.7
28.26	17716.1	24868.3	25009.8	20268
28.28	17482.4	24791	24874.5	20517.7
28.3	17805.4	24856.7	24910.5	20355.6
28.32	17636.6	24998.1	24736.1	20617.4
28.34	17905.8	24967.6	25061.5	20515.6
28.36	17997.1	25191.6	24983.3	20441.3
28.38	17601.9	25125.7	24920.6	20418.6
28.4	17715.5	25098.7	24786.5	20561.2
28.42	17648.5	25167.2	24921.3	20722.8
28.44	17668.8	25273.2	25060.5	20369.5
28.46	17559.3	25317.2	24998	20621
28.48	17870.3	25284.2	24885.3	20511.3
28.5	17641.4	25725.7	25177	20417
28.52	17505.6	25541.5	25069.2	20582.9
28.54	17545.5	25278.6	25199.3	20599.9
28.56	17639.5	25384.7	25027.5	20471.3
28.58	17602.6	25911.3	25266	20559.2
28.6	17647.4	25565.5	24856.1	20380.7
28.62	17470.9	25715.7	25214.5	20305.6
28.64	17544.1	25540.1	25125.3	20495.6
28.66	17661.1	25835.3	24882.1	20275.1
28.68	17406.4	25914.1	24950.9	20546.9
28.7	17523.5	25867.6	25230.5	20471.6
28.72	17498	25653	25200.6	20625.4
28.74	17416.1	25749.2	25119.1	20350.5
28.76	17371.6	25665.2	24927.6	20375.6
28.78	17271	25555.9	25444.2	20613.3
28.8	17274.1	25634.2	25333	20556.1
28.82	17226.8	25649.9	25165.6	20188.7
28.84	17264.5	25449.1	25149.8	20544.1
28.86	17347.7	25629.5	25086.2	20334
28.88	17137.7	25482.9	24850.8	20409.5
28.9	17224.8	25467	25150.7	20500
28.92	17070.5	25174.1	24905.8	20194.7
28.94	17065.6	25407	25161.1	20368.7
28.96	17243.9	25294.4	25008.2	20295.6
28.98	16983.4	25199.2	25020.1	20118
29	17005.1	25312.3	24815.3	20418.2
29.02	17132	25552	24809	20239.9
29.04	17027.7	25191.1	24925.8	20385.2
29.06	16967.9	24964.6	25064.6	20344.8
29.08	17062.5	24998.2	24955.5	20316.8
29.1	16832.8	25238.1	25051	20203.9
29.12	16722.4	25185	24778.6	20168.8
29.14	16845.4	25044	24864.7	20497.7
29.16	16886	24883.2	24797.8	20032.8
29.18	16777.2	24816.8	24503.3	20153.7
29.2	16852.2	25104.7	24690.3	20305.7
29.22	16616.5	24862.6	24920.7	20302.7
29.24	16653.1	24986.2	24795.8	20180.6
29.26	16741.4	25027.2	24652.4	20512.7
29.28	16631.4	25210	24705.2	20498.8
29.3	16716.1	25324.2	24636.3	20305.7
29.32	16443	24697.5	24608.1	20475.3
29.34	16500.9	25097.1	24514.4	20303.1
29.36	16536.7	25026	24403.6	20086.7
29.38	16596.3	24652.1	24739.4	20283.2
29.4	16549.3	24713.7	24367.1	20345.6
29.42	16591.6	24900.2	24306.8	20296.5
29.44	16521.1	24886.5	24623.1	20381.1
29.46	16524.2	24651.4	24456	20241.1
29.48	16386.2	24865.3	24606.5	20358.1
29.5	16590.4	24575.9	24540.5	20190
29.52	16286.1	24715.9	24594.4	20209.3
29.54	16339.5	24880	24257.8	20251.8
29.56	16184.1	24594	24400	20419.8
29.58	16316	24542.6	24254	20158.5
29.6	16237.3	24761.9	24222.4	20256
29.62	16476.6	24760.4	24585.1	20190.2
29.64	16191.7	24460.3	24324.8	20287.9
29.66	16327.2	24773	24335.9	20204.8
29.68	16256.8	24597.1	24189	20236.9
29.7	16096.5	24495.3	23961	20537
29.72	15988	24682.9	24119.9	20234
29.74	16381.8	24589.3	24053.6	20199.5
29.76	16448.3	24463.5	24210.1	20308.4
29.78	16412	24481.1	24010.5	20256.5
29.8	16249.2	24511.8	23983.9	20258.4
29.82	15942.7	24246.8	24083.7	20360.1
29.84	16433.5	24528.2	24168.2	20244.7
29.86	16145.6	24359.2	24152.3	20046.7
29.88	16101.7	24133.8	23821.5	20480.3
29.9	16508.5	24522.7	24077	20384.6
29.92	16211.4	24643.6	24097.8	20446.2
29.94	16197.1	24370.2	24123.4	20163
29.96	16099.5	24436.2	24270.7	20205.6
29.98	16152.2	24575.5	24313.5	20463.8
30	16208.8	23954.3	23945.2	20188.3
30.02	15991.7	24105.5	24019.4	20163
30.04	16232.3	24386	23888.8	20283.8
30.06	16196.7	24439	24012.8	20189.3
30.08	16169.1	24295.9	24050.2	20227.1
30.1	16104.1	24096.6	23979.2	20103.3
30.12	16125.8	24070.3	24331.3	20358.3
30.14	16474.5	24482.6	24003.4	20319
30.16	16191.7	24276.3	24103.4	20277.2
30.18	16101.7	24031.3	24015.1	20294.1
30.2	16031.9	24123.6	24147.1	20474.7
30.22	15879.9	23908.8	23850.3	20347.3
30.24	15998.3	24196.5	23835	20319.6
30.26	16029.6	24340.3	24033.7	20497.3
30.28	16174.8	23944.2	24191.2	20307
30.3	15990.1	23795.3	23956.9	20303.8
30.32	15819.9	24042.4	24115.8	20209.7
30.34	15955.9	24012.6	23842.4	20474.8
30.36	16278.7	24032.3	23962.1	20521.8
30.38	16117	23775	23918.2	20007.7
30.4	16115.7	23727.5	23896.1	20313.5
30.42	15953.9	23559.1	24091.7	20071.3
30.44	16062.1	23723.2	23881.1	20127.6
30.46	15876.1	23749.5	23916.4	20436.2
30.48	15871.2	23578.1	24026.7	20145.9
30.5	15897	23680	24046.6	20303.5
30.52	16066.8	23799.4	23801.2	20588.9
30.54	16005	23832.7	23975.3	20293.4
30.56	16159.1	23602.8	24063.2	20308.2
30.58	16064.3	23723.2	23993	20219
30.6	16097.2	24046	24109.6	20284.8
30.62	16093.9	23468.5	24263.7	20199
30.64	15894.4	23458.3	24118.9	20264.2
30.66	15989.4	23483.8	23834.1	20325.8
30.68	15935.5	23272.7	24151.9	20560.4
30.7	15976.3	23486.1	23877.4	20130.1
30.72	16109.6	23158.1	24139.3	20213.2
30.74	15994.6	23496.3	23869.5	20611.9
30.76	16111.8	23478.4	23838.1	20072.7
30.78	15938	23275.2	23789.5	20415.5
30.8	15835.7	23451.3	23747.3	20209.1
30.82	15909.9	23396.6	23986.2	20457.7
30.84	15864.7	23025.2	24214.6	20146.5
30.86	15925.5	23590	24034.1	20146
30.88	15852.5	23321.7	23998.5	20238.8
30.9	15766.8	23205.1	23876.5	20289.9
30.92	15866.4	23193.7	24070.1	20179
30.94	15690.9	23203.5	23912.6	20525.3
30.96	16178.6	23348.1	24039.9	20584.6
30.98	16211.1	23499.8	23760.6	20527.3
31	16077.8	23201.8	23885.9	20260.9
31.02	16044.1	23119.7	23884.1	20114.3
31.04	15789.3	23106.7	23788.1	20337.1
31.06	16123.9	23413.4	24107.8	19932.2
31.08	15943.8	23104.3	23942.5	20218.8
31.1	15779.5	23387.5	23849.4	20313.6
31.12	15517.4	23116.7	23851.3	20266.7
31.14	15884.6	22990.1	24182.4	20183.1
31.16	16029.2	22925.4	24005.4	20246.8
31.18	16173.8	23015.2	23876.4	20116.4
31.2	15717.8	23048.5	23831.1	19950.3
31.22	15910.2	22757.7	23990.3	20364.8
31.24	15695.2	23267.9	24173.9	20098
31.26	15972.4	23276.9	23939.4	20384.6
31.28	15562.2	22839.4	23833.2	20161.7
31.3	15987.7	22835.4	24044.2	20144.5
31.32	15842.6	22970.1	24160.2	20220.5
31.34	15952.6	23012.5	23993.6	20147.2
31.36	16045	23001.1	24002.2	20183.6
31.38	16071.4	22746.9	24062.6	20385
31.4	15935.5	22926.1	23892.6	20593
31.42	16047.8	22824.3	24080.5	20596.1
31.44	15741.8	22742.3	24079.9	20634.6
31.46	15854.2	22798.5	24110.3	20372.7
31.48	15905.2	22603	23984.6	20612.8
31.5	15776.7	22838.9	23800	20657
31.52	15797.2	22895.9	23887.5	20362
31.54	16007.5	22469.6	24035.5	20195.3
31.56	15991.5	22627.3	24050.6	20364.4
31.58	15875	22686.2	23802.4	20462.6
31.6	15737.6	22878.8	23791.6	20494.8
31.62	16017	22681.3	23880.2	20315.9
31.64	15771.7	22642.3	23865.5	20460.4
31.66	15938.7	22909.1	23873.9	20348.3
31.68	15927.6	22637.8	24264.3	20333.2
31.7	15997.1	22725.9	24060.4	20481.5
31.72	15693.2	22673.6	23877	20299.1
31.74	16124.5	22595.7	24061.3	20352.1
31.76	15912.3	22726.9	24173.6	20462.3
31.78	16128.5	22466.1	23779.4	20266.5
31.8	15649	22373.1	23839.3	20396.1
31.82	16121.5	22404.3	24063.5	20700.5
31.84	15957.4	22477.5	23810.8	20365
31.86	16034.3	22365.3	24009	20378.1
31.88	16011.2	22287.4	23885.1	20376.8
31.9	16052.5	22328.9	23901.1	20211.6
31.92	15835.9	22419.5	23970.8	20337.2
31.94	16109.4	22527.4	23841	20471.4
31.96	15906.6	22595.6	23782.4	20459.4
31.98	15934.9	22387	24076.4	20500.3
32	15935.2	22368.5	23908.1	20455.9
32.02	15707.4	22142.2	23909.7	20504.3
32.04	15839.4	22354.6	24060.5	20256.1
32.06	15878.5	22532.9	23730	20540.1
32.08	16029.2	22108.5	23657.9	20301.2
32.1	15713.9	22422.4	24073.3	20237.6
32.12	15943.7	22203.9	23776.3	20135.6
32.14	15904.5	22154.9	23750.3	20349
32.16	15972.2	22144.6	23866.6	20394.1
32.18	16101.7	22076.9	24094.1	20631
32.2	15904.8	22384	24226.2	20274.1
32.22	16080	22059.9	23987.7	20458.2
32.24	15877.8	21815.8	23776.7	20451.6
32.26	16031	22015.8	23705.9	20644.3
32.28	15949.6	22128.2	23929.3	20520.2
32.3	15832.4	22318.1	23878.1	20382.7
32.32	15984	22160.5	23879.3	20364.1
32.34	15944.8	22097.6	24510.2	20422.4
32.36	15952	22146.9	24027.4	20199.2
32.38	15811.1	22169.9	24089.1	20671.2
32.4	15672.7	21978	24128.7	20468.3
32.42	16063.4	22158.6	23980	20485.2
32.44	15734.2	22155.2	24160.8	20627.4
32.46	16151.3	21922.8	24053.9	20672.9
32.48	15973.3	22127.8	23837.8	20493.4
32.5	15864.9	22082.3	24040	20565.2
32.52	15742.1	21829	23952.8	20493.9
32.54	15985.4	21861.5	24250.4	20497.2
32.56	15840.7	22009	24272.2	20517.1
32.58	15882	21977	24122	20423.7
32.6	15669	22021.4	23984.9	20513.8
32.62	16176.9	22080.7	24385.2	20493.4
32.64	16003.6	22100.8	23944.2	20646.6
32.66	15887.5	21945.3	23965.5	20301.9
32.68	15990.8	22126.9	23910.2	20757.9
32.7	15806.1	21725.7	24023.4	20539.3
32.72	16123.8	21943.9	24325.1	20396.6
32.74	15961.9	21909.7	23889.2	20711.8
32.76	16010.5	21786.6	24007.9	20236.8
32.78	16290	22008.7	23912.4	20542.5
32.8	15738.4	21849.9	24058.5	20595.5
32.82	15917.3	22022.2	23840.3	20538.1
32.84	16004.3	21955	23868.9	20377.4
32.86	15919.3	22000.9	23813.1	20352.5
32.88	15921.2	22218.5	23973.9	20518.2
32.9	15981.7	21905.8	24117.6	20584.2
32.92	15988.8	21934.6	23631.8	20357.1
32.94	16053.8	21929.9	23977.8	20522.6
32.96	16000.1	21953.6	23918.4	20580.6
32.98	16137.4	22048.1	24181	20527.9
33	16135.1	22086.6	23907	20565.8
33.02	16045.7	21955.9	23845.1	20379.4
33.04	15965.4	21922.9	24027.4	20581.5
33.06	15947.1	21626.8	23911.4	20695.5
33.08	16105.9	21752.5	24341.4	20778.6
33.1	15901.2	21649.9	24083.6	20716.4
33.12	16210.4	21750.2	23947.7	20572.6
33.14	16013.8	21992.3	24082	20425.8
33.16	15913.4	21607.6	24242.7	20481.8
33.18	15940.9	21454.8	24291.8	20490
33.2	15964.2	21994.8	24208.3	20565
33.22	15784.5	21649.8	24048.9	20658.6
33.24	15972.1	21885	24234.3	20541.9
33.26	15932.9	21582	24040.1	20606.8
33.28	16092.8	22018.6	23955.3	20689.8
33.3	15897.9	21808.3	24067.7	20480.1
33.32	16000.5	21675.8	23971	20503.3
33.34	15865.4	21654.2	23880.4	20346.8
33.36	15687.3	21520.3	24078.4	20586.3
33.38	16157.1	21667.3	24260.1	20881.9
33.4	15757.2	22041.1	24201.1	20771.4
33.42	15867.6	21655	23993.6	20655.6
33.44	16111.1	21626.9	24187.4	20469.9
33.46	16091.3	21760.1	24149.1	20556.5
33.48	16075.9	21734.3	23976.1	20547.4
33.5	15984.7	21775.1	23891	20601.6
33.52	15881.4	21615.9	24132	20419.7
33.54	15887.2	21714.9	24187.7	20449.5
33.56	16088.8	21867.7	24055.4	20760.7
33.58	15912	21723.8	24310.4	20610.6
33.6	15794.2	21762.5	24376.4	20667.4
33.62	16229.6	21640.6	24316.3	20575.9
33.64	15918.5	21746.9	24134.2	20642.2
33.66	16006.2	21863.3	24203.3	20983.8
33.68	15917.6	21548.4	23983.6	20596.5
33.7	16025.4	21537.3	24038.4	20688.3
33.72	16221.2	21778.7	24227.5	20737.4
33.74	16091.2	21637	23981.3	20728.3
33.76	16151.9	21918.5	24108.4	20657.6
33.78	16063.5	21847.4	24489.1	20448.4
33.8	15949.6	21919.3	24383.6	20755.9
33.82	16038.2	21404.9	24017.4	20777.3
33.84	16032.5	21299.1	24050.4	20712.7
33.86	16095.9	21499.2	24262.1	20405.4
33.88	16005.9	21407.3	24191.7	20523.4
33.9	16183.2	21764	24164.8	20739.4
33.92	15907.5	21748.7	24367.3	20731.6
33.94	16185.4	21507.8	24277.7	20775.1
33.96	15894.8	21968.7	24183	20854.6
33.98	16132.3	21767.4	24111.3	20727.3
34	15912.1	21662.6	24173.2	20704.6
34.02	16046.1	21756.6	24224.8	20801.6
34.04	16111	21597.6	24299.2	20479.7
34.06	16026.1	21613.9	24025.3	20748.9
34.08	16033.3	21670.6	24378.5	20544.9
34.1	16172.4	21458.4	24364.6	20877.4
34.12	16164.1	21336.5	24378.6	20742.6
34.14	15912.5	21453.7	24257.9	20534.8
34.16	16199.1	21670.1	24314.8	20748.4
34.18	16197.4	21408.2	24435.4	20766
34.2	16125.3	21518.7	24160.1	20614.2
34.22	15993	21431.5	24363.7	20775.9
34.24	16275.3	21728.6	24347.5	20853.9
34.26	15985.6	21685.1	24515.3	20817.2
34.28	16181.6	21565.6	24472	20894.3
34.3	16073.1	21484.1	24349.9	20440.6
34.32	16160.8	21508.4	24151.4	20698.5
34.34	16068.7	21629.2	24414.2	20710.6
34.36	16380.3	21412	24191.6	20988.5
34.38	16417.4	21450.4	24378.3	20540.9
34.4	16366.3	21677.5	24320.5	20861.4
34.42	16312.3	21851	24463.1	20813.7
34.44	16191.8	21613.5	24480.9	20673
34.46	16240	21862.1	24411.6	20740.5
34.48	16413.9	21656	24067.2	20677.3
34.5	16160	21624.1	24491.7	20750.9
34.52	16111.9	21439.5	24181.8	20706.5
34.54	16225.3	21501.1	24613.2	20783
34.56	16423.4	21672.1	24321.2	20962.7
34.58	16285.9	21316.7	24405.3	20665.3
34.6	16264.8	21603.6	24047.8	20893.6
34.62	16105.4	21687	24520.2	20711.9
34.64	16264.3	21407.5	24264.7	20662.8
34.66	16287.1	21361	24651.5	20907.6
34.68	16304.8	21436.5	24509.2	20817.5
34.7	16357.3	21625.5	24593.4	20798.4
34.72	16545.5	21357.5	24482.5	21124
34.74	16023.1	21480.5	24580.2	20934.7
34.76	16248	21565.3	24453.6	20757.8
34.78	16223.4	21626	24434.1	20906
34.8	16045	21723.5	24339.7	20748.6
34.82	16300.8	21690.2	24521.6	20849.5
34.84	16154.5	21355.5	24246.8	20886.4
34.86	16523.9	21778	24730	20674.9
34.88	16300.1	21590.4	24323.1	20748.5
34.9	16264.3	21643.2	24384.8	20781.9
34.92	16386.2	21853.9	24245	21074.7
34.94	16246.1	21218.3	24196.3	20974.9
34.96	16089.4	21837	24601.8	20950.4
34.98	16432.6	21661.6	24206.6	20916
35	16265.3	21586.9	24395.9	20854.1
35.02	16390.6	21761.4	24331.6	20853.9
35.04	16417.9	21462.5	24648.1	20980.6
35.06	16435.2	21491.1	24233.1	20856.2
35.08	16176.1	21788	24576.4	20903.3
35.1	16548	21353	24300.5	20893.9
35.12	16303.8	21489.2	24561.8	20725.2
35.14	16389.9	21538.5	24297.2	20741.7
35.16	16276.5	21330.1	24468.8	20773.9
35.18	16319.4	21712.3	24730.4	20522.6
35.2	16553.1	21585.2	24529.6	20725.6
35.22	16496.4	21675.5	24748.7	20934.2
35.24	16210.4	21731.8	24567.4	20573.4
35.26	16537.6	21911.3	24548.7	20941.3
35.28	16684.8	21548.9	24686.3	21129.7
35.3	16283.1	21571	24529.1	20630.3
35.32	16542.7	21707.6	24397.1	20573
35.34	16475.1	21750.4	24477.2	20693.1
35.36	16399.3	21394.4	24499.6	20755.7
35.38	16448.9	21626.9	24706	20631.3
35.4	16425.7	21753.9	24615.1	20744.7
35.42	16425.7	21586.2	24651	20674.7
35.44	16716.9	21607.6	24920.9	20865.6
35.46	16618.5	21827.7	24813.2	20867.8
35.48	16493	21699.7	24838.6	20971
35.5	16469.9	21514.1	24895.7	20794.4
35.52	16474.8	21807.8	24716.3	20943.1
35.54	16564	21822.5	24581.2	20820
35.56	16566.5	21766	24726	20916.4
35.58	16707.8	22042.6	24870.6	20816.2
35.6	16680.6	21973.9	24752.6	21079.4
35.62	16692.2	21968.1	24825.7	20851.4
35.64	16741.6	21701.6	24908.8	20942.7
35.66	16571.4	21772.1	24638	21195.1
35.68	16715.4	21829.4	24935	20819.1
35.7	16659.1	21944.1	25008.8	20697.8
35.72	16777.6	21992.9	25124.5	21052.5
35.74	16861.9	21720.8	24874	20716.8
35.76	16776.3	21758.8	25122.6	20726.8
35.78	16755.5	21946.5	25171.3	20694.8
35.8	16821.7	21806.6	25504.9	20517.3
35.82	17016.9	21849.2	25218.3	20847.2
35.84	16716.4	21831.9	25353.4	20681.9
35.86	16705.2	21971.3	25308.9	20665.5
35.88	16721	21935.3	25324.6	20928
35.9	16812.4	22139.1	25519.5	20772.6
35.92	17011	22080.8	25230.2	20790.8
35.94	17017.3	21945.3	25395.9	20853.7
35.96	16849.6	21967.1	25518.5	20949.7
35.98	17059.2	22053.9	25501.5	20844.2
36	17297.7	22041.5	25615.3	21096.5
36.02	16947.8	22437.6	25474.6	21222.5
36.04	17301.3	21994.8	25955.9	20976.6
36.06	17078.8	22381.4	25326.7	21263
36.08	17113.2	22085.1	25656.4	21076.8
36.1	17003.5	22133.6	25779	21267.3
36.12	17119.3	22377.1	25670.1	21197.2
36.14	17023	22124.6	25817.6	20845.4
36.16	17162.9	22426.1	25708.2	21189.4
36.18	17237.5	22450.2	26080.5	21308.7
36.2	17109.6	22699.8	25683.9	20948.9
36.22	17286.2	22427.5	26139.7	21145.6
36.24	17167.2	22481.8	25877.6	21298.4
36.26	17356.6	22679.6	26218.2	21377.3
36.28	17371.1	22331.4	26053.6	21216.8
36.3	17235.3	22748.4	26287.9	21260
36.32	17484.1	22531.6	26512.6	21358.3
36.34	17363.5	22763.1	26319.7	21512.7
36.36	17228	22880.5	26705	21738.7
36.38	17492.5	22951.4	26486.1	21695.8
36.4	17393.4	22982.6	26631.5	21523.7
36.42	17580.1	22808.4	26756.3	21756.7
36.44	17602	23336.5	26733.1	21762.9
36.46	17630.2	23124.6	26823.4	21808.5
36.48	17616.1	22950.8	26836.9	21638.4
36.5	17501.7	23185.3	27217.1	21682.3
36.52	17868	23290.2	27060.8	22188.2
36.54	17652	23498.8	27387.3	22320.5
36.56	17832.7	23609	27347.1	22362.6
36.58	18017.9	23931.1	27017.1	22315.6
36.6	17842.9	23825.8	27466.9	22538.3
36.62	17847	23831.7	27304.9	22335.2
36.64	17984.4	23888.4	27370.4	22745.1
36.66	18089.2	24336	27673.6	23104.8
36.68	18413.1	24025.3	27728.2	23288.2
36.7	18324.8	24607.9	27875.7	23507.7
36.72	18295	24807	28120.9	23644.9
36.74	18355	24691.7	28029.3	23838.6
36.76	18858.6	24888.5	27881.6	24221
36.78	18634.7	25015.4	28088.1	24418.6
36.8	18618.5	25592.5	28285.9	24691.7
36.82	18863.7	25483.7	28366.5	24491.7
36.84	18986.2	25877.4	28634.1	25021.2
36.86	19095.2	26391.2	28569.7	25195.6
36.88	19445.1	26416.6	28657.1	25404.1
36.9	19442.6	26551.7	28616.4	25292.4
36.92	19149.5	26837.8	28786.9	25871.9
36.94	19668.7	27436.2	28640.3	26170.7
36.96	19769.3	27533.6	28814.3	26087.5
36.98	19995.7	27998.6	28878.6	26088.1
37	19849.7	27801.3	28954.6	26475.6
37.02	20197.7	28316.8	28835	26355.2
37.04	20448.1	28585.7	29004.9	26222.3
37.06	20612.7	28899	29072.6	26070.2
37.08	20569.4	29565.6	29112	26312.7
37.1	20976.4	29493	29318.3	26188.8
37.12	21085.6	29949	29176.2	26160.3
37.14	21210.1	29878.1	29287.9	26105.8
37.16	21095.1	30401.4	29151.2	25902.2
37.18	21514.4	30653.4	29312.7	25901.8
37.2	21569.6	30752.1	29214.6	25417.1
37.22	21824.6	30607	29362.7	25521.7
37.24	22076.2	31020	29827	25324.1
37.26	21899.1	30903.9	29561.4	25081.4
37.28	22268.2	31046.6	29518.4	24802
37.3	22191.7	30725.7	29502	24863
37.32	22188	30920	29302.2	24224.9
37.34	22257.4	30654.2	29438.9	24407.8
37.36	22336.3	30607.6	29692.6	23880.1
37.38	22234.4	30603.8	29617.7	23968.1
37.4	22722	30033.4	29453.2	24030.9
37.42	22406.2	29974.6	29835.3	23817.2
37.44	22547	30009	29747.9	23750.2
37.46	22461.7	29596.1	29714.5	23416.7
37.48	22336.3	29107.6	29301.8	23308.8
37.5	22221.7	28750.8	29661.9	22931
37.52	21963.4	28857.2	29642.5	23189
37.54	21909.2	28644.1	29204.2	22975.1
37.56	21738.8	28120.6	29401.5	22807.1
37.58	21806.9	27722	29381.4	22658.7
37.6	21447.7	27945.1	29411.2	22617.9
37.62	21340	27603.8	29325.3	22489.1
37.64	21009.6	27239	28970.8	22466.2
37.66	21010	27073	29134.8	22459.2
37.68	20895.9	27148.7	29245.9	22201.1
37.7	20683.9	26711.6	28936.1	22000.4
37.72	20711.7	26529.7	28620	22073.5
37.74	20590.6	26649.4	28924.2	21968.1
37.76	19942.9	26582.3	28484	22079.1
37.78	19847.1	26595.8	28533.1	21827
37.8	19986.4	26017.2	28479.8	21967
37.82	19923.2	26241.8	28334.3	21529.3
37.84	19621.2	25930.2	28253.4	21793.9
37.86	19622.8	25351.5	27692.5	21835.3
37.88	19299.7	25619.7	27880.2	21830.7
37.9	19465.8	25541	27821.1	21888.3
37.92	19257.3	25239.5	27939.2	22127.6
37.94	19162.4	25399.1	27663.7	21930.7
37.96	19193	25164.9	27434.1	21761
37.98	18843.4	25132.4	27576.7	21794.2
38	18599.3	24969.2	27403.6	21647.4
38.02	18790.7	24655.1	27075.5	21696.3
38.04	18621.9	25071.2	27025	21774.5
38.06	18938.6	24643.1	27008.3	21589
38.08	18719	24549.4	27322.2	21660
38.1	18316.5	24600	26968.7	21699.3
38.12	18504.3	24375.7	26973.9	21368.8
38.14	18093.9	24508	27185.8	21661.5
38.16	18267.7	24261.7	26933.4	21669.8
38.18	18230.4	24232.8	26896.3	21448.1
38.2	18287.4	24472.9	26749.8	21303.3
38.22	17993.2	24046.7	26594	21335.6
38.24	18067.8	24294.6	26683.3	21316.8
38.26	18171	23736.3	26909.3	21443.2
38.28	17855.2	23850.4	26540.5	21457.5
38.3	18050.4	23868.1	26475.1	21367.9
38.32	17872.3	23769.3	26380.1	21173.1
38.34	18000.8	23740.2	26082.7	21149.7
38.36	18045.1	23470.6	26425.1	21334.1
38.38	17858.4	23836.8	26583	21066
38.4	17575.9	23665.1	26234.7	21431.2
38.42	17683.3	23271.8	26388.1	21080.5
38.44	17739.2	23172.2	26275.4	21281.7
38.46	17702.2	23340.8	26423.1	21389.5
38.48	17543.9	23413.1	26449.6	21284
38.5	17601.2	23155.9	26127.8	20989.9
38.52	17396.9	23186.1	26349.8	21074.9
38.54	17857.4	23114.4	26148.3	20943.6
38.56	17509	23015.2	26404.1	20966
38.58	17494	23078	26099.9	21099.6
38.6	17390.8	23045.2	25917.5	21230.8
38.62	17365.4	23089.2	25976.8	21123.3
38.64	17381.9	22845.5	26151.4	21043.3
38.66	17339.3	22921	25861.6	21043.6
38.68	17298.5	22929.7	25751.8	21215.3
38.7	17123.2	22978.2	25903.3	20970
38.72	17458.2	23069.1	25685.7	21123.9
38.74	17206.2	22618.7	25838	20908.5
38.76	17049.9	23004.2	25781.1	21064.8
38.78	17113.1	22405.6	25739.5	21106.4
38.8	17236.5	22551.1	25959.4	20956.5
38.82	17362.8	22602.8	25588.8	21148.5
38.84	17178.9	22824.2	25789.4	21135.9
38.86	16926.2	22798.2	26188.9	20791.9
38.88	17037.5	22471	25754.8	21022.5
38.9	17326.1	22736.3	25463.4	21081.8
38.92	16953.9	22464.4	26073.9	20759.7
38.94	16932.2	22830.6	25356.5	20755.4
38.96	17213.8	22634.5	25747.1	20897.9
38.98	17081.2	22550.2	25605.2	20875.5
39	17053.1	22654.7	25570.9	21074.6
39.02	16868.3	22644.4	25551.3	21038.1
39.04	16774.5	22508	25391.5	20671
39.06	16828.7	22497.6	25540.9	20961
39.08	16961.8	22889	25511.1	20830.9
39.1	16611	22425	25455.1	20672.2
39.12	16779.7	22615.4	25675.6	20700.2
39.14	16934.1	22426.9	25355	20853.8
39.16	16782.9	22327.7	25681	20905
39.18	16668.3	22514.6	25451.3	20743.5
39.2	16703.8	22262.7	25464.5	21180.1
39.22	16858.5	22409.8	25460.2	20718.8
39.24	16773.3	22346.8	25403.9	20697
39.26	16606.4	22649.2	25289	20828.9
39.28	16547	22220.8	25419	20648.6
39.3	16699.1	22238.4	25496.2	20839.9
39.32	16869.1	22369.2	25362.1	20724.2
39.34	16707.5	22283.9	25361	20899.5
39.36	16580.6	22168.1	25404.7	20847.9
39.38	16360.5	22469.1	25160.3	20484.4
39.4	16453.3	22409.5	25582.1	20491.4
39.42	16646.2	22305.5	25503.2	20612.2
39.44	16497.7	22177	25065.8	20585.6
39.46	16590.2	22285.4	25084.1	20763.3
39.48	16782.7	22338.8	25048.8	20468.9
39.5	16678.1	22395.4	24963	20610
39.52	16643.3	22414.7	25501.6	20697.7
39.54	16681.4	22474.8	25248.8	20521.7
39.56	16603.6	22064.9	25044.3	20580.2
39.58	16546.5	22205.6	24965	20404.5
39.6	16607.5	22402.4	24936.9	20586.8
39.62	16775.5	22543.1	25012.8	21029.3
39.64	16930.3	21957	25277.2	20257.4
39.66	16439.4	22150	25034.4	20580
39.68	16691.7	22012.9	25086.7	20279.7
39.7	16692.2	22169.1	25146.6	20630.3
39.72	16652.7	22024.1	25124	20605.9
39.74	16577.6	22062.1	24967.3	20682.5
39.76	16505.6	22169.4	24856.1	20594.4
39.78	16586.3	21864.2	24795	20813
39.8	16404.6	22035.7	24880.9	20449.1
39.82	16705.7	22095.7	25086.3	20563.1
39.84	16720.2	22191.5	25077	20896.3
39.86	16658	22353.6	25015.9	20662.6
39.88	16697.2	21936.8	24729.9	20443.7
39.9	16607.9	22161.1	25140.6	20862.3
39.92	16543.9	21973.3	24892.6	20348.5
39.94	16530.2	21847	24885.4	20525.2
39.96	16688.9	22047.1	24975.6	20726.8
39.98	16549.8	22284.6	24919.6	20429.7
40	16651.1	22279.8	25346.6	20589.9
40.02	16760.9	22306.8	25171.5	20955.2
40.04	16407.4	22156.1	24790.5	20824.7
40.06	16355.6	22107.6	24870.9	20508.6
40.08	16589.1	22188.3	24880.9	20352.4
40.1	16809.4	22313.5	25012.6	20944
40.12	16531.2	21840.1	25065.1	20676.9
40.14	16758.6	22106.8	24893.1	20555.3
40.16	16769.2	21886.8	24789.7	20778.4
40.18	16624.7	21915.5	25060	20861.6
40.2	16626.1	21833.6	24980.2	20738
40.22	16686.3	22078.5	25025.4	20625
40.24	16738.1	22161.9	24970.5	20620.1
40.26	16779.4	21918.6	24868.7	20715.5
40.28	16871.3	22026.4	24606.4	20572.7
40.3	16694.6	21918.6	24903.8	20748.3
40.32	16640.1	21926.7	24557.2	20799.8
40.34	16899.6	22047.1	25020	20915.8
40.36	16657.1	22018	24708.1	20577.5
40.38	16399.6	21961.3	24657.7	20755.3
40.4	16544.6	22232.8	25002.2	20867.8
40.42	16769.9	21944.9	24755.7	20764.6
40.44	16680.8	21953.9	25233.8	20913.8
40.46	16741.3	22117.8	24959.9	20770.1
40.48	16731.5	22196.5	24741.6	20801.1
40.5	16787.2	22129.8	25007.8	20930
40.52	16661.6	22243.5	25072	20912.9
40.54	16627.4	21970.8	25000.8	20768.1
40.56	16738.1	22119.4	25146	20814.6
40.58	16716.3	21914.4	24951.1	21024.2
40.6	16909.3	22178.8	25276.6	20564.6
40.62	16718.5	22124.1	25085.8	20493.9
40.64	16760.8	22040.3	25110.7	20596.6
40.66	16673.4	22257.2	25095.2	20492.4
40.68	16893.5	21907.3	25151.5	20725.7
40.7	17160.9	22073.7	25174.6	20659
40.72	16761.1	22275.8	25157.4	20575.3
40.74	16819.2	22141.3	24955.7	20715.8
40.76	16814.7	22155.5	25375.5	20510.4
40.78	16838.7	22141.7	25353.6	20564.2
40.8	16830.5	22080.1	24963.7	20639.9
40.82	16930.5	22272.7	24984.6	20966.3
40.84	16927.2	22385.4	25198	20576.4
40.86	16782.4	22077.5	24934.2	20293.4
40.88	16858.9	22317.8	25137.3	20458.6
40.9	16784.8	22247.6	25068.7	20525.4
40.92	16922.8	22138.6	25028.5	20568.8
40.94	16975	22322.7	25002.6	20417.2
40.96	16750	22278.8	25009.8	20514.8
40.98	16901.3	22270.2	25123.7	20459.8
41	17032	22257.2	25197.2	20319.4
41.02	17111.4	22558.8	24938.2	20213.7
41.04	17001.5	22284	25167.6	20483.2
41.06	16917.4	22259.2	25186.2	20777.2
41.08	17067	22681.4	24883.2	20477.9
41.1	17050.9	22526	25057.4	20582.5
41.12	16842.9	22334.9	25183.6	20599.8
41.14	17440.3	22534	25278.5	20512.8
41.16	17139.5	22562.6	25374.8	20463.3
41.18	17294	22663.5	24862.8	20330
41.2	17178.9	22302.5	25324.3	20437
41.22	17218.8	22413.5	25343.6	20281.5
41.24	17261.7	22937.6	24969.2	20494.7
41.26	17146.9	22774.8	25115	20316
41.28	17530.5	22370.4	25290.4	20491
41.3	17264.7	22619.6	25019.2	20375.5
41.32	17509.5	22630.4	25036.5	20178.7
41.34	17356.9	22655	25146.1	20280.5
41.36	17505.9	22226.3	25129.9	20391
41.38	17132.3	22420.3	25047.7	20477
41.4	17691.4	22337.5	24938	20598.8
41.42	17455.8	22405.6	25222.5	20465.9
41.44	17479.2	22388.9	25215.9	20526.5
41.46	17521.5	22284.9	25368	20503.3
41.48	17605.8	22156.3	25311.1	20595.9
41.5	17843.6	22011.1	25353.7	20530.1
41.52	17480.6	22300.7	25224.4	20598.7
41.54	17394.7	22185.1	25390.5	20534.9
41.56	17746.4	22170	25607.8	20745.5
41.58	17846.5	22398.9	25565.4	20499.8
41.6	17984.4	21982.1	25668.5	20831
41.62	17929.7	21919	25294	20856.7
41.64	17969.6	21813.5	25528.8	20442.1
41.66	18079.6	22135.9	25553.7	20796.9
41.68	17805.9	22022.8	25875.2	20953.9
41.7	18037.7	22151.8	25710.9	21137.6
41.72	18155.8	21798.6	25747.5	21012.8
41.74	17871.3	22275.2	25507.1	21147.7
41.76	17941.4	21854.2	25546	20889.1
41.78	18030.9	22006.9	26064.8	20954.5
41.8	17956.4	22049.9	25402.4	21086.8
41.82	18051.4	22017	25754.7	21099.9
41.84	18025.4	21777.7	25744.1	21233.6
41.86	17818.2	22041.5	25895.9	21199.3
41.88	17902.2	21915.7	25826.7	21398.3
41.9	17742.3	22182.4	25559.3	21224.5
41.92	17859.5	22009.1	25626	21544.1
41.94	17659.9	22216.9	25844.8	21723.4
41.96	17761.6	21930.5	25942	21450.9
41.98	17590	22184.2	25779.1	21699.9
42	17650.6	21973	25540	21846.7
42.02	17531.9	22228.9	25840.6	21770.5
42.04	17808.9	22286.5	25729.9	21888.2
42.06	17549.4	22428.3	25762.6	22348.4
42.08	17795.3	22218.2	25789.4	22177.4
42.1	17570.5	22366	25801.4	22457.7
42.12	17705.6	22588.2	25753.5	22773.8
42.14	17277.6	22328.7	25638.9	22750.1
42.16	17556	22325	25668	22715
42.18	17269.4	22605.5	25794	23009.9
42.2	17240.6	22438.2	25776.4	23349.6
42.22	17393.2	22571.5	25414.9	23322.3
42.24	17077.5	22776.6	25637.5	23546.3
42.26	17129.5	23012.7	25464.1	23677.4
42.28	17138.3	23152.9	25774.2	23626.7
42.3	17076.5	23128	25643.3	23681.9
42.32	17099.2	23224.9	25680.3	23963.6
42.34	16950.2	23463	25745.9	23768.8
42.36	17105.8	23396.6	25510.5	24050.4
42.38	17148.5	23875.6	25313.2	24119.6
42.4	17041.8	23844.5	25589.9	24132.2
42.42	16960.2	23731.1	25528.2	24166
42.44	17139.4	23800.2	25530.7	24237.2
42.46	16941.3	23924.8	25280.6	24036.9
42.48	16957.2	24230.3	25540.3	24198
42.5	16885	24011.8	25098.7	24070.8
42.52	16876.9	24783.3	25369.1	24113.1
42.54	16801.7	24513.6	25116.9	23931
42.56	16873.9	24671.3	25199.6	23840.4
42.58	16907.1	24652.2	25367.2	24181.8
42.6	16739.3	25015.7	25226.9	23886.2
42.62	16867.7	24885.4	24991.4	23558.8
42.64	16651.6	25247.2	25192.8	23483.8
42.66	16844.9	25341.3	25220.5	23315
42.68	16482.4	25179.9	24953.6	23150.8
42.7	16691.6	25294.4	24796.2	22986.2
42.72	16641.3	25240.8	24771.9	22984.1
42.74	16712.8	25409.9	25132.8	22582.9
42.76	16738.8	25517.2	24772.3	22660.2
42.78	16859.8	25244.6	25208	22805.4
42.8	16646.8	25395.3	25224.5	22544.8
42.82	16549.7	25269	25007.6	22314.1
42.84	16512.3	25407.8	24907.4	21902.5
42.86	16568.8	25111	25121.9	22321
42.88	16578.8	24588.3	24700.8	21886.1
42.9	16754.4	24712	24850.2	21773.7
42.92	16532.6	24620.6	24750.9	21977.1
42.94	16439.3	24698.6	24685.3	21709.7
42.96	16490.3	24365.6	24552.6	21764
42.98	16265.8	24252	24964	21688.9
43	16440.4	24103.4	24910	21340.1
43.02	16404.3	24224	24839.2	21308.5
43.04	16493.5	23943.9	24588.5	21370
43.06	16688.5	23974.3	24957.1	21512.5
43.08	16516.6	23723	24790.9	20867.9
43.1	16457.1	23892.9	24728.7	21240.3
43.12	16434.3	23606.6	24720.6	21409.8
43.14	16301.4	23468.4	24515.5	20789.7
43.16	16378.8	23313	24747.2	21140.8
43.18	16584.7	23206.4	24466.8	20974.9
43.2	16499.9	23116.2	24576	20872.9
43.22	16350	23128	24762.1	20946.9
43.24	16574.7	23026.3	24455.9	20804.7
43.26	16449.5	22899	24714.2	20880.1
43.28	16447.4	22931.1	24637.9	20758
43.3	16600.1	23087.4	24455.9	20926.2
43.32	16297.2	22869.8	24578.8	20788.9
43.34	16639.8	22791.2	24297.7	20390
43.36	16336.6	22801.6	24463.7	20693
43.38	16292.9	22570.6	24532	20716.4
43.4	16143.2	22456.7	24404.4	20415.2
43.42	16361.5	22357.9	24296.8	20722.3
43.44	16498.1	22614.4	24264.9	20498.7
43.46	16283.9	22331.9	24630.4	20528.7
43.48	16278.6	22567.9	24194.3	20472.3
43.5	16405.7	22564.4	24494.3	20538.1
43.52	16136.2	22221.9	24412.8	20767.1
43.54	16223.5	22192.2	24390.4	20565.1
43.56	16541.7	22154	24331.8	20405.5
43.58	16325.7	22375.8	24615	20434.4
43.6	16314.1	22337.5	24390.7	20293.3
43.62	16346.1	22098.9	24495.8	20313.1
43.64	16276.5	22051.2	24136.8	20428.9
43.66	16445.4	22181.9	24541.2	20354.5
43.68	16351.7	22008.3	24258.9	20472.3
43.7	16465.3	22209.8	24234.7	20517.7
43.72	16203.8	22012	24355.5	20417
43.74	16218.2	22106.8	24148.6	20323.9
43.76	16188.3	22073.8	24156.6	20355.8
43.78	16405.6	21813.4	24139	20454.1
43.8	16280.6	21977.8	24439.6	20323.4
43.82	16431.8	22076	24184.2	20308
43.84	16244.3	22049.7	23975.2	20531.7
43.86	16366.1	22006.2	24313.4	20424.9
43.88	16298.6	21655.9	24035.9	20494.4
43.9	16194.2	21962.5	24457.2	20808.3
43.92	16275.1	22000.9	24514	20310.9
43.94	16301.5	21936.5	24115.4	20410.7
43.96	16504	21894.1	24236.6	20158.4
43.98	16290.6	21968.2	24145.4	20525.9
44	16372.8	21687.3	23977.6	20371.1
44.02	16475.5	22051.3	24010.3	20288.1
44.04	16381.5	21784.5	23942.9	20446.3
44.06	16116.4	22024.8	23926.6	20271.3
44.08	16512.4	21746.3	24042.5	20316.5
44.1	16284.2	21908.7	24396.6	20360.2
44.12	16187.1	21605.4	24066.3	20336
44.14	16237.8	21681.8	23969.9	20464.7
44.16	16330.4	21956.7	24107.2	20178.8
44.18	16372.4	21755.9	23728.4	20374.7
44.2	16437.2	21863.4	23788.2	20366.8
44.22	16336.4	21846.8	24293.6	20440.4
44.24	16203.6	21880.6	24229.4	20447.4
44.26	16381.9	21756.2	23975.8	20410.4
44.28	16514.9	22017.7	24142.7	20017.3
44.3	16251.4	21848.4	24194.2	19989.1
44.32	16172.6	21610.1	23749.7	20489.5
44.34	16432.9	21606.1	23762.4	20555.6
44.36	16379	21758.1	24016.7	20183.6
44.38	16518.1	21837.2	24159.6	20221.5
44.4	16026.6	21744.1	23888.6	20256.9
44.42	16245.5	21523.9	24225.3	20133.6
44.44	16330.1	21417.3	23891.9	20048.7
44.46	16233.7	21858.7	23955.5	20120
44.48	16550.9	21760.2	24080.2	20174.8
44.5	16177.3	21801.6	24126.2	20121.4
44.52	16190.1	21768.1	24171.6	20193.2
44.54	16346.9	21557.7	24018.2	20338.9
44.56	16052.6	21815	23890.8	20082.2
44.58	16094.6	21618.6	24028.5	20200.4
44.6	16550.6	21813.3	23710.8	20313.8
44.62	16218.8	21988.2	23926.4	20048.6
44.64	16136.9	21650.7	23852.9	20166
44.66	16167.1	21893.4	23841.2	20081.9
44.68	16202.1	21931.6	23884.9	20228.2
44.7	15883.4	21536.8	23921.4	20490.6
44.72	16319.1	21543.8	23875.9	20419.9
44.74	16321.2	21699.1	24000.4	19979.5
44.76	16232.7	21825.9	23988.3	20159.2
44.78	16268.6	21865.1	23876.6	20235.8
44.8	16183.9	21634.7	23993.1	20055.1
44.82	16168.3	21754.2	23930.9	20240.3
44.84	16129.2	21581.1	23699.1	19891.9
44.86	16316.7	21917.5	23917.4	20188.3
44.88	16278.2	21643.6	24048.6	20044.1
44.9	16290.1	21535.5	24000.4	20144.8
44.92	16270.6	21573	24075.7	20081.1
44.94	16376.9	21525.8	23788.8	20313.7
44.96	16142.5	21735.7	23631.5	20297.8
44.98	16395.9	21641.6	24196.7	20352.9
45	16267.5	21633.5	23472.1	20268.1
45.02	16034.1	21510.6	23685.2	20086.6
45.04	16237	21620.3	23819.9	20084
45.06	16607.8	21758.6	23825.2	19973.9
45.08	16215	21644.2	23875.5	20464.5
45.1	16317.7	21655	23797.7	20225.8
45.12	16314.2	21669.7	24045	20301.6
45.14	16367.9	21703.9	24022.5	20495.5
45.16	16503.4	21520.5	23847.4	20491.7
45.18	16387	21704.2	23862.3	20229.1
45.2	16315.5	21828.2	23884.4	20146.4
45.22	16484.8	21594.8	23936	20120
45.24	16343.1	21668.8	23842.1	20185.7
45.26	16375.7	21599.7	23829.7	20232.8
45.28	16247.6	21613	23998.3	19928
45.3	16502.7	21378	23910.3	20494.4
45.32	16543.4	21519.6	23884.1	20365.4
45.34	16311	21590.7	23407	20202.1
45.36	16401.9	21394.1	24109.3	20382
45.38	16320.9	21632.4	23744.4	19720.5
45.4	16300.1	21579.5	23947.2	20098.8
45.42	16495	21479.1	23749.1	20148.7
45.44	16479.2	21545.4	23899.1	20437.3
45.46	16646.3	21801.9	23841.6	20343.3
45.48	16600.1	21743.7	23422.7	20283.5
45.5	16377.8	21380.3	23755.4	20371.4
45.52	16415.1	21477.3	23887.4	20223.7
45.54	16506.3	21362.2	23669.8	20173
45.56	16435.5	21813.8	23786.5	20422.9
45.58	16193.3	21630.4	23825.1	20200.6
45.6	16206.8	21344.2	23887.6	20267.6
45.62	16461.9	21800.2	23921.3	20297.7
45.64	16802.5	21489.5	23742.4	20146.5
45.66	16350.7	21432.1	23795.7	20220.8
45.68	16549.5	21526.6	23843.2	20195
45.7	16295	21547.3	23625.8	20349.6
45.72	16733.5	21718.3	23692.7	20320.5
45.74	16478.4	21489.5	23667.9	20290.5
45.76	16551.6	21338.7	23723.3	20140
45.78	16340.4	21382.4	23613.9	20184.2
45.8	16667.4	21256.2	23763.6	20254.3
45.82	16570.7	21377	23564.3	20305.1
45.84	16511.9	21491.2	23590.7	20231.1
45.86	16443	21508	23910.2	20231.7
45.88	16572.7	21277.6	23619.4	20084.5
45.9	16508.2	21608.1	23535.6	20162.8
45.92	16363.1	21525.7	23721.9	20018.3
45.94	16533.9	21567.7	23921	20194.8
45.96	16471.2	21528.7	24004.7	20011
45.98	16273.4	21524.5	23848.1	20259
46	16658.1	21445.6	23613.4	19915.1
46.02	16561.8	21494.2	23461	19983.6
46.04	16438.2	21299.8	23767.4	20028.1
46.06	16691.6	21482	23422.4	20345.6
46.08	16594.5	21347.6	23722.2	20284.7
46.1	16566.7	21305.8	23712.9	19980.9
46.12	16305.9	21328.5	23604.2	20171.6
46.14	16444.7	21289.1	23978.6	20067.2
46.16	16666.6	21301.1	23827	20316.2
46.18	16284.1	21350.7	23660.3	20092.3
46.2	16483.3	21432.5	23850.7	19987.1
46.22	16593.1	21307.7	23785.5	20205.1
46.24	16606.5	21600.4	23836.1	20051.8
46.26	16752	21361.4	23738.4	20104.5
46.28	16625.5	21293.3	23646.2	20225.3
46.3	16521.4	21546.2	23976	20230.2
46.32	16559.9	21579.6	24012.2	20258.5
46.34	16633.8	21378.8	23870	20288.3
46.36	16826.3	21066.6	23861.3	20379
46.38	16568.9	21507.9	23534.5	20313.3
46.4	16600.7	21351.3	23683.1	20207
46.42	16503.7	21338.3	23878.6	20244.7
46.44	16626.3	21244.8	23983.6	20227.8
46.46	16600.8	21413.1	24039.6	20344.4
46.48	16739.7	21531.8	23837	20296.8
46.5	16493.8	21244.2	23918.1	20486.3
46.52	16585.5	21384.6	23948.6	20243.3
46.54	16622.3	21060.3	23892	20054.7
46.56	16578.2	21230.6	23652.6	20130.6
46.58	16695.5	21559.6	23688.3	20523.5
46.6	16660.2	21295.4	23779.8	20066.7
46.62	16693.5	21080.6	23635.2	20403.3
46.64	16293.2	21363	23672.7	20111.9
46.66	16437	21468	23547.4	20468.5
46.68	16862.4	21124.8	23870.1	20406.9
46.7	16780.9	21363.5	23655.7	20322.5
46.72	16688.5	21149.3	23741.6	20452.1
46.74	16591	21604.1	23718.3	20230.5
46.76	16543.8	21185.3	23801.2	20455.3
46.78	16563.8	21185.2	23429.1	20662.5
46.8	16584.3	21569.3	23711.7	20465
46.82	16479.6	21034	23503.5	20717.5
46.84	16355.2	21404.5	23639.9	20137.9
46.86	16812	21145.1	23774.3	20289.8
46.88	16647.6	21085.3	23765	20434.8
46.9	16733.5	21366.8	23760.8	19952.9
46.92	16861.5	20885.2	23576.1	20086.1
46.94	16506.1	21038.8	23943.2	20364.8
46.96	16752.9	21140.8	23873.1	20261
46.98	16786.9	21411	23981.6	20312.3
47	16689.9	20979.2	23880.9	20505.3
47.02	16815.5	21533.7	23682.7	20411.1
47.04	16759.8	21029	23658.4	20414.7
47.06	16824.1	21404.6	23768.4	20585.3
47.08	16878.7	21230.8	23683.8	20274.9
47.1	16632	21170.7	23791.9	20410.2
47.12	16763.2	21391.5	23642.6	20422.7
47.14	16455.1	21149.6	23749.9	20326.8
47.16	16914.9	21191.1	23878	20539.9
47.18	16479.9	20924.1	23614.7	20267.5
47.2	16960	21372.6	23438.9	20311.1
47.22	16715.7	21336.6	23900.2	20100
47.24	16763.6	21267.5	23922.2	20277
47.26	16727.2	21255.8	23670.3	20544.5
47.28	16661.3	21291.5	23828.4	20379.2
47.3	16625.7	21560	23811.2	20595.9
47.32	16717	21503.2	23736.2	20616.8
47.34	16569.2	21383.8	24032.6	20417.9
47.36	16525.1	21469.6	23587.4	20372.1
47.38	16578.7	21266.2	23798.6	20201.3
47.4	16194.1	21366.4	23664.6	20518.5
47.42	16783.2	21183.8	23799.6	20404.1
47.44	16403	21295.5	23589.3	20367.3
47.46	16487.2	21333.3	23816.7	20030.1
47.48	16774.1	21171.1	23873.6	20698.7
47.5	16577.9	21435.9	23674.4	20528.7
47.52	16611.5	20905.6	23975.3	20102.9
47.54	16584.5	21315.5	23825.2	20206.9
47.56	16645.1	21082.9	23685.8	20831.3
47.58	16552.3	21196.7	23743.9	20345.1
47.6	16683.6	21242.4	23887.6	20594.8
47.62	16830.7	21407.4	23768.7	20191.8
47.64	16535.5	21324.9	23490.3	20223.7
47.66	16504.8	20855.2	23847.4	20417.5
47.68	16633.8	21216.9	23701.3	20451.1
47.7	16541.6	21175.9	23717.2	20506.6
47.72	16850.3	21153.8	23698.3	20439.1
47.74	16875.3	21219.2	23835.9	20084.2
47.76	16825	21213.4	23538	20581.9
47.78	16735.4	21036.7	23564.9	20184.8
47.8	16934.8	21153.4	23765.3	20519
47.82	16653.1	21428.6	23881.1	20231.9
47.84	16676.6	21255.9	23849.9	20519.6
47.86	16461.5	21368.8	24006.2	20394
47.88	16561.7	21393	23534.8	20360.2
47.9	16729.6	21308.5	23790.4	20347.9
47.92	16929.8	21280.2	23971.7	20549.1
47.94	16943	21196.2	23486.3	20775
47.96	16796.4	21206.4	23729.5	20513.5
47.98	16672.4	21180	23898	20484.8
48	17079.4	21283.9	23423.2	20809.7
48.02	16782.5	21275.3	23566.9	20441
48.04	16869.3	21124.6	23674.8	20505.6
48.06	16558.5	21068.2	23384.8	20392.5
48.08	16878.6	21409.4	23718.9	20509.7
48.1	16464.4	21214.2	23637.1	20331.2
48.12	16729.2	21433.5	23740.5	20407.3
48.14	16625.9	21420.1	23724.5	20529.2
48.16	16892.8	21430.6	23757.8	20642.2
48.18	16886.1	21349.3	23669.9	20547.1
48.2	16785.6	21317.3	23768.7	20605.3
48.22	16729.1	21290.1	23874.6	20571.8
48.24	17081	21376.4	23308.7	20482.7
48.26	16926.5	21210.3	23695.7	20280.3
48.28	16716.4	21152.9	23564.3	20381.7
48.3	16967.5	21202.5	23600.1	20407.6
48.32	16952.1	21046.1	23717.6	20533.8
48.34	16919.7	21188.6	23601	20244
48.36	16659.8	21092.2	23748	20343.8
48.38	16932.8	21146.9	23602.3	20337.1
48.4	16746.7	21202.7	23776.4	20240.6
48.42	16763.5	21429.7	23784.6	20485.6
48.44	16773.6	21093.5	23344.4	20325.6
48.46	16968.4	21000.7	23707.9	20128.2
48.48	16958.5	21281.9	23772.5	20234.6
48.5	16927.5	21307.7	23907.8	20407
48.52	17001.9	21263.7	23612.7	20841.5
48.54	17115.8	21505.7	23709.4	20441.9
48.56	17034.5	21195.2	23687.8	20408
48.58	16948.6	21504.2	23648.2	20397.4
48.6	16897.5	21257.6	23580	20517.9
48.62	17104.8	21314.5	23825.7	20265.6
48.64	16764.3	21318.9	23407	20467.1
48.66	17122.7	21141	24087.5	20451.7
48.68	16905.7	21147.6	23491.5	20654.9
48.7	16857	21288.3	23528.1	20680
48.72	16840.2	21238.9	23905.5	20679.5
48.74	16983.4	21243.9	23917.5	20535.1
48.76	16930	21227.5	23739.9	20505.5
48.78	16908.2	21249	23598.5	20592.2
48.8	17057.2	20933.4	23688.1	20616.6
48.82	17123	21271.4	23555.2	20596.5
48.84	17322.2	21242.9	23763.2	20357.8
48.86	17243	21504.2	23799.6	20574.8
48.88	17592.6	21103.9	23912.6	20605.7
48.9	17308.7	21149.8	23815.7	20396.6
48.92	17323.9	21084.2	23943	20587.6
48.94	17385.5	21591.2	23850.6	20667.8
48.96	17370	21273.3	23843.4	20278.9
48.98	17401.6	21535	23555.3	20770
49	17546.7	21233.3	23757.4	20552.4
49.02	17570.4	21274.8	23920.4	20420.8
49.04	17564.8	21171.4	23891.8	20688
49.06	17607.6	21305.1	23779.7	20431.4
49.08	17553.6	21222.6	23695.5	20489.9
49.1	17456.6	21136.9	24159.3	20340.6
49.12	17603.3	21200.2	23760.3	20605.7
49.14	17631.4	21510.2	23749.2	20502.2
49.16	17665.2	21208.7	23993.5	20622.6
49.18	17695.6	21410.8	23942.8	20572.6
49.2	17839.4	21222.2	23768.8	20524.3
49.22	17851.9	21237.7	23824	20806.7
49.24	17726	21470	23962.2	20688.8
49.26	17591.3	21195.6	23997.6	20714.9
49.28	17685.1	21341.2	24191.4	20505.3
49.3	17918.6	21255.2	23901	20899.4
49.32	17871.3	21188.3	24077.1	20785.1
49.34	17882	21178.3	23902.5	20517.3
49.36	17834.2	21500.6	24083.9	20653.9
49.38	18148.7	21168.7	24205.5	20711.9
49.4	18003.5	21092.8	24191.2	20675
49.42	17990.6	21429.3	24104.8	20679.1
49.44	18009.2	21121.3	24413.6	20689.9
49.46	17875.9	21369.5	24079.4	20387.9
49.48	18049.7	21541.9	24406.3	20631.5
49.5	18129.4	21216.9	24257.7	20706.1
49.52	18124.4	21219.7	24062.1	20544.7
49.54	17997.4	21267.3	24231.7	20485.3
49.56	18163.1	21116.8	23937.2	20452.2
49.58	18167.6	21514	23906.3	20548.7
49.6	18422.2	21342.8	24158	20811.7
49.62	17994.4	21373.8	24370.5	20695.3
49.64	18127	21379.3	24201.4	20737.1
49.66	18067.5	21215.4	24163.6	20579.6
49.68	18239	21506.3	24104.7	20563.2
49.7	18059.9	21294.6	24300.9	20571.4
49.72	17937.7	21268.9	23932	20557.5
49.74	18220.1	21264.8	24369.4	20706.7
49.76	18037.5	21586.6	24345.6	20682.4
49.78	18082.1	21338.5	24609.7	20653.9
49.8	18053.2	21444	24025.6	20458.4
49.82	17949.1	21179.3	24467.3	20583.6
49.84	18140.7	21184.6	24597	20475.3
49.86	18018.5	21261.3	24418.7	20520.7
49.88	17985.1	21486.1	24478.9	20551.5
49.9	17804.7	21275.6	24385.9	20885
49.92	18211.7	21425.6	24614.4	20978.3
49.94	17965.9	21178.2	24249.8	20529.8
[truncated: 1,503 more rows]

## Sheet: Figure_5
Alfa-MnO2		Beta-MnO2		Delta-MnO2		Ganma-MnO2		Ir/C (Premetek)		Pt/C		No Catalyst
Voltage / V	Current Density / mA cm^(-2)	Voltage / V	Current Density / mA cm^(-2)	Voltage / V	Current Density / mA cm^(-2)	Voltage / V	Current Density / mA cm^(-2)	Voltage / V	Current Density / mA cm^(-2)	Voltage / V	Current Density / mA cm^(-2)	Voltage / V	Current Density / mA cm^(-2)
1.20012	0.106179	1.20019	0.0861786	1.20005	0.0999128	1.20024	0.127544	1.19991	0.145028	1.19991	0.101528	1.20001	0.348763
1.20062	0.106272	1.2007	0.086337	1.20055	0.099989	1.20075	0.127662	1.20043	0.145612	1.2004	0.101521	1.20053	0.348436
1.20114	0.106337	1.20121	0.0864588	1.20105	0.100158	1.20123	0.12762	1.20095	0.146207	1.20089	0.101561	1.20103	0.347967
1.20164	0.106322	1.2017	0.0865172	1.20154	0.100331	1.20169	0.127626	1.20144	0.146825	1.2014	0.101607	1.20153	0.347623
1.20214	0.10632	1.2022	0.0865392	1.20202	0.100563	1.20218	0.127788	1.20195	0.147426	1.20191	0.101641	1.20203	0.34714
1.20263	0.106392	1.20273	0.0865318	1.20253	0.100769	1.20269	0.127745	1.20244	0.147818	1.2024	0.101576	1.2025	0.346622
1.20313	0.106497	1.20324	0.0865415	1.20303	0.100899	1.20323	0.12762	1.20292	0.148165	1.2029	0.101584	1.203	0.345997
1.20363	0.106449	1.20373	0.0866098	1.20353	0.101018	1.20376	0.127593	1.20341	0.148567	1.20339	0.101574	1.20349	0.345416
1.20414	0.106515	1.20424	0.0868445	1.20403	0.101168	1.20422	0.127768	1.20392	0.149045	1.2039	0.101573	1.20398	0.345065
1.20464	0.106629	1.20473	0.0871328	1.20453	0.101381	1.2047	0.127989	1.20442	0.149618	1.2044	0.101603	1.20448	0.3449
1.20514	0.106763	1.2052	0.0872337	1.20504	0.101492	1.20522	0.128195	1.20493	0.15019	1.2049	0.10167	1.205	0.344606
1.20564	0.106832	1.20571	0.0872414	1.20554	0.101623	1.20573	0.128277	1.20543	0.150745	1.20539	0.101674	1.20553	0.343929
1.20614	0.106832	1.20621	0.0871445	1.20604	0.101829	1.20623	0.128194	1.20594	0.151158	1.20589	0.101658	1.20602	0.342999
1.20663	0.106894	1.20669	0.0870507	1.20653	0.101961	1.20672	0.128212	1.20645	0.15144	1.2064	0.101658	1.20648	0.341845
1.20713	0.106899	1.20719	0.0870218	1.20702	0.102145	1.20721	0.128211	1.20696	0.15179	1.20689	0.101726	1.20695	0.341235
1.20763	0.106869	1.20772	0.0869966	1.20752	0.102133	1.2077	0.128121	1.20747	0.152099	1.20738	0.101828	1.20747	0.340713
1.20813	0.10688	1.20824	0.0871266	1.20802	0.102187	1.20821	0.12803	1.20796	0.15252	1.20787	0.101884	1.20799	0.340215
1.20862	0.106952	1.20874	0.0871959	1.20852	0.10223	1.2087	0.128038	1.20845	0.153061	1.20836	0.101934	1.2085	0.339811
1.20911	0.107041	1.20923	0.0872505	1.20902	0.102494	1.20922	0.128204	1.20895	0.15366	1.20886	0.101954	1.20899	0.339254
1.20962	0.107142	1.20972	0.0874299	1.20952	0.102649	1.20973	0.128269	1.20945	0.154061	1.20938	0.101937	1.20948	0.338642
1.21012	0.107198	1.21022	0.0876448	1.21003	0.102813	1.21025	0.128348	1.20993	0.154541	1.20989	0.101978	1.20998	0.338094
1.21061	0.107206	1.21072	0.0876886	1.21055	0.103023	1.21077	0.12843	1.21044	0.154976	1.21038	0.101985	1.2105	0.337344
1.21111	0.107228	1.21125	0.0876988	1.21106	0.103249	1.21125	0.128458	1.21094	0.155506	1.21087	0.101977	1.211	0.336653
1.21163	0.107208	1.21172	0.0877117	1.21158	0.103342	1.21172	0.128415	1.21144	0.156062	1.21138	0.101997	1.21149	0.336021
1.21212	0.10736	1.2122	0.0878904	1.21207	0.103526	1.21219	0.128457	1.21195	0.156639	1.21188	0.102021	1.21199	0.335557
1.21262	0.107488	1.21271	0.0881467	1.21252	0.103748	1.21267	0.128543	1.21246	0.157422	1.21239	0.102057	1.21249	0.335371
1.21312	0.107544	1.21323	0.0882478	1.21301	0.10406	1.21318	0.12853	1.21294	0.158182	1.2129	0.102108	1.21299	0.33516
1.21363	0.107584	1.21374	0.0881543	1.21352	0.104377	1.21371	0.128621	1.21343	0.158805	1.2134	0.102133	1.2135	0.334849
1.21413	0.107655	1.2142	0.0881084	1.21405	0.104576	1.21423	0.128852	1.21393	0.159398	1.21389	0.102094	1.21399	0.334353
1.21463	0.107796	1.2147	0.0881985	1.21457	0.104654	1.21474	0.129027	1.21444	0.160107	1.21439	0.102188	1.2145	0.33371
1.21514	0.107963	1.21519	0.0884745	1.21508	0.104906	1.21522	0.129207	1.21495	0.161018	1.21489	0.102238	1.21501	0.333154
1.21565	0.108056	1.2157	0.0885296	1.21558	0.10506	1.21572	0.129123	1.21545	0.161964	1.21539	0.102206	1.2155	0.332655
1.21615	0.108039	1.21622	0.0886516	1.21606	0.105223	1.21622	0.129121	1.21595	0.162731	1.2159	0.102179	1.21599	0.332197
1.21664	0.108037	1.21671	0.0888341	1.21656	0.105449	1.21674	0.129154	1.21645	0.163514	1.2164	0.102214	1.2165	0.331749
1.21715	0.108126	1.21721	0.0889061	1.21704	0.105746	1.21725	0.129203	1.21696	0.164216	1.21692	0.102236	1.21701	0.331266
1.21766	0.108286	1.21771	0.0890271	1.21754	0.105943	1.21775	0.129273	1.21744	0.164709	1.21739	0.102209	1.2175	0.330794
1.21815	0.10853	1.21822	0.0891751	1.21805	0.106369	1.21824	0.129325	1.21793	0.165173	1.2179	0.102251	1.218	0.330467
1.21865	0.108545	1.21872	0.0892266	1.21855	0.106567	1.21874	0.129269	1.21842	0.165579	1.2184	0.102307	1.21852	0.330157
1.21914	0.108637	1.21922	0.0891471	1.21906	0.106744	1.21922	0.129385	1.21893	0.166051	1.21891	0.102331	1.219	0.329563
1.21964	0.108802	1.21972	0.0891083	1.21956	0.106856	1.21971	0.129371	1.21945	0.16644	1.21941	0.102356	1.21948	0.328904
1.22014	0.109071	1.22021	0.0893241	1.22006	0.107001	1.22022	0.129659	1.21995	0.16685	1.21991	0.102305	1.21997	0.32827
1.22064	0.109261	1.22072	0.0894103	1.22055	0.107165	1.22073	0.129961	1.22044	0.167205	1.2204	0.102296	1.22048	0.32768
1.22113	0.109276	1.22124	0.0895933	1.22105	0.107439	1.22122	0.130217	1.22095	0.167527	1.22092	0.10236	1.22098	0.327108
1.22164	0.109222	1.22173	0.0896907	1.22156	0.107693	1.22171	0.130306	1.22143	0.167757	1.22144	0.10248	1.22149	0.326618
1.22214	0.109375	1.2222	0.0897392	1.22204	0.107854	1.22222	0.13034	1.22193	0.167923	1.22194	0.102597	1.222	0.326148
1.22265	0.109556	1.22271	0.0898201	1.22254	0.108	1.2227	0.130339	1.22243	0.168037	1.22243	0.102608	1.2225	0.325576
1.22315	0.109584	1.22321	0.089875	1.22304	0.108178	1.2232	0.130107	1.22294	0.168177	1.22292	0.102656	1.22301	0.32513
1.22364	0.109505	1.22372	0.0898867	1.22355	0.108276	1.22371	0.129865	1.22344	0.168305	1.22338	0.102859	1.22352	0.324827
1.22413	0.109612	1.22423	0.0900446	1.22405	0.108479	1.22424	0.130033	1.22395	0.168445	1.2239	0.102969	1.224	0.324418
1.22463	0.109815	1.22474	0.090264	1.22452	0.10884	1.22474	0.130406	1.22446	0.168653	1.22439	0.103059	1.2245	0.323906
1.22514	0.110178	1.22524	0.0903898	1.22502	0.109178	1.22522	0.130662	1.22495	0.168934	1.22488	0.103098	1.225	0.323443
1.22563	0.110282	1.22574	0.0904173	1.22552	0.109419	1.22573	0.130752	1.22544	0.169169	1.22537	0.103154	1.22549	0.322902
1.22613	0.110262	1.22624	0.0903423	1.22601	0.109528	1.22623	0.130893	1.22593	0.16935	1.22589	0.103143	1.22598	0.322322
1.22663	0.11028	1.22671	0.0903739	1.22654	0.109488	1.22671	0.131106	1.22644	0.169532	1.2264	0.103198	1.22647	0.321938
1.22714	0.110469	1.22719	0.0905142	1.22704	0.109574	1.22722	0.131378	1.22693	0.1698	1.2269	0.103289	1.22699	0.321631
1.22764	0.110642	1.22773	0.0907309	1.22751	0.109579	1.22772	0.131369	1.22744	0.170175	1.22741	0.103349	1.2275	0.321254
1.22813	0.110819	1.22823	0.0909482	1.228	0.109831	1.22819	0.131339	1.22793	0.170522	1.2279	0.103448	1.22799	0.320878
1.22862	0.11101	1.22871	0.0910926	1.22852	0.110191	1.22871	0.13141	1.22841	0.170896	1.22839	0.103559	1.22848	0.320557
1.22913	0.111203	1.22919	0.0911807	1.22902	0.110431	1.22922	0.131652	1.22892	0.171322	1.22889	0.103514	1.22898	0.320303
1.22964	0.111341	1.22969	0.0913112	1.22953	0.110588	1.2297	0.131868	1.22943	0.171783	1.22939	0.103572	1.22949	0.320086
1.23013	0.111549	1.23021	0.0914912	1.23003	0.110782	1.2302	0.132082	1.22993	0.172199	1.22988	0.103638	1.23	0.319824
1.23063	0.111766	1.2307	0.0916708	1.23053	0.110928	1.2307	0.132345	1.23043	0.172759	1.23038	0.103759	1.23048	0.319591
1.23114	0.112172	1.23121	0.0920952	1.23104	0.11112	1.23123	0.132808	1.23093	0.173504	1.23089	0.10366	1.23099	0.319249
1.23165	0.112507	1.23172	0.0923533	1.23156	0.111272	1.23172	0.133122	1.23145	0.174192	1.23138	0.103228	1.23151	0.318872
1.23214	0.112845	1.23221	0.0926189	1.23206	0.111478	1.23223	0.133496	1.23195	0.174657	1.23188	0.103064	1.23201	0.318568
1.23264	0.113111	1.23271	0.0929176	1.23255	0.111621	1.23272	0.133788	1.23245	0.175174	1.2324	0.103064	1.23251	0.31833
1.23315	0.113231	1.23321	0.0931323	1.23306	0.111839	1.23323	0.133807	1.23295	0.175691	1.2329	0.103112	1.23298	0.317982
1.23365	0.113407	1.23374	0.0932413	1.23355	0.11207	1.23374	0.133867	1.23345	0.176174	1.2334	0.103181	1.23347	0.317542
1.23415	0.11358	1.23427	0.0935224	1.23404	0.1122	1.23426	0.133953	1.23394	0.176614	1.23389	0.103276	1.23396	0.31696
1.23466	0.113859	1.23478	0.0937769	1.23454	0.112302	1.23476	0.134088	1.23442	0.177114	1.23439	0.103324	1.2345	0.316352
1.23515	0.114208	1.23526	0.0940943	1.23505	0.112384	1.23525	0.134216	1.23492	0.177593	1.23489	0.103394	1.23501	0.315692
1.23565	0.11439	1.23574	0.0941931	1.23554	0.112523	1.23573	0.134438	1.2354	0.177998	1.23539	0.1034	1.2355	0.315033
1.23616	0.114543	1.23624	0.094452	1.23603	0.112672	1.23624	0.134955	1.23592	0.178506	1.2359	0.103478	1.23598	0.314543
1.23666	0.114737	1.23675	0.0949948	1.23651	0.112901	1.23675	0.135516	1.23644	0.179129	1.2364	0.103572	1.23647	0.314032
1.23715	0.115049	1.23725	0.0954276	1.23701	0.113122	1.23724	0.135632	1.23696	0.179593	1.23689	0.103697	1.23698	0.313368
1.23764	0.115366	1.23776	0.0955944	1.23752	0.11334	1.23775	0.13548	1.23745	0.179972	1.23738	0.103697	1.23749	0.31241
1.23813	0.115617	1.23826	0.0955613	1.23805	0.113584	1.23823	0.135297	1.23795	0.18044	1.2379	0.103854	1.23798	0.311299
1.23863	0.115571	1.23874	0.0955793	1.23855	0.113763	1.2387	0.135268	1.23846	0.180843	1.2384	0.104005	1.23847	0.310276
1.23913	0.115526	1.23924	0.095503	1.23903	0.113809	1.23922	0.135474	1.23896	0.181136	1.2389	0.104307	1.23897	0.309695
1.23965	0.115726	1.23973	0.0956268	1.23952	0.1139	1.23973	0.135425	1.23946	0.18126	1.23941	0.104685	1.23949	0.309144
1.24015	0.116227	1.24023	0.095921	1.24002	0.114101	1.24023	0.135661	1.23997	0.181548	1.23991	0.104822	1.24	0.308355
1.24064	0.116584	1.24073	0.0962896	1.24053	0.114231	1.24075	0.136114	1.24046	0.18212	1.24039	0.10489	1.24051	0.307375
1.24114	0.116585	1.24122	0.0962304	1.24104	0.114426	1.24126	0.136446	1.24094	0.182608	1.2409	0.104914	1.24101	0.306501
1.24165	0.116816	1.24172	0.0963933	1.24153	0.114595	1.24176	0.136633	1.24143	0.182957	1.2414	0.10499	1.2415	0.306103
1.24215	0.117144	1.24223	0.0965362	1.24201	0.114792	1.24225	0.136805	1.24192	0.183351	1.2419	0.105127	1.24199	0.305712
1.24264	0.117424	1.24273	0.0967787	1.24251	0.115099	1.24275	0.137043	1.24242	0.183705	1.24241	0.105213	1.24249	0.305072
1.24314	0.117581	1.24325	0.0969941	1.24304	0.11536	1.24326	0.137101	1.24293	0.18401	1.2429	0.105389	1.24297	0.304353
1.24364	0.117523	1.24372	0.0969758	1.24353	0.115635	1.24375	0.137186	1.24343	0.184224	1.2434	0.105444	1.24348	0.303709
1.24414	0.117726	1.2442	0.0972159	1.24402	0.115872	1.24425	0.137506	1.24393	0.184565	1.24392	0.105523	1.24398	0.303197
1.24465	0.118149	1.24472	0.0977381	1.24452	0.116161	1.24474	0.137873	1.24445	0.184988	1.24442	0.105643	1.24449	0.302758
1.24514	0.118496	1.24523	0.0982408	1.24501	0.116418	1.24522	0.138158	1.24496	0.185427	1.2449	0.105821	1.24498	0.302327
1.24565	0.118766	1.24576	0.0985053	1.24553	0.116634	1.24573	0.138337	1.24545	0.185747	1.24539	0.105914	1.24548	0.301791
1.24615	0.118944	1.24627	0.0986435	1.24603	0.116813	1.24625	0.138398	1.24593	0.186001	1.24589	0.105965	1.24598	0.301368
1.24665	0.119053	1.24675	0.0988871	1.24653	0.117126	1.24674	0.138472	1.24644	0.186375	1.2464	0.106131	1.2465	0.300883
1.24714	0.119273	1.24722	0.0992005	1.24703	0.117442	1.24722	0.138404	1.24694	0.18688	1.24691	0.106358	1.247	0.30052
1.24764	0.119343	1.2477	0.0992625	1.24752	0.11768	1.24771	0.138334	1.24744	0.187431	1.2474	0.106502	1.24749	0.300047
1.24814	0.119429	1.24823	0.0995673	1.24803	0.117833	1.24822	0.138413	1.24795	0.187815	1.2479	0.106674	1.24798	0.299375
1.24864	0.119556	1.24876	0.0999123	1.24854	0.118111	1.24872	0.138721	1.24845	0.188281	1.2484	0.106881	1.24849	0.2989
1.24914	0.119787	1.24926	0.100027	1.24905	0.118545	1.24922	0.139123	1.24894	0.188754	1.24888	0.107001	1.249	0.298223
1.24964	0.120113	1.24975	0.100312	1.24955	0.118866	1.24974	0.139394	1.24943	0.189114	1.24938	0.107165	1.24951	0.297321
1.25013	0.120545	1.25023	0.100425	1.25005	0.119238	1.25025	0.139477	1.24993	0.189685	1.24988	0.107278	1.25002	0.296517
1.25063	0.120791	1.25072	0.100481	1.25053	0.119587	1.25075	0.13953	1.25045	0.190281	1.25038	0.107463	1.25051	0.295767
1.25115	0.120842	1.25122	0.100701	1.25102	0.119951	1.25124	0.139673	1.25097	0.190739	1.25088	0.107576	1.25101	0.295138
1.25165	0.120882	1.25173	0.101055	1.25153	0.12009	1.25174	0.139855	1.25147	0.191135	1.2514	0.107706	1.2515	0.294477
1.25215	0.121111	1.25223	0.101431	1.25204	0.120322	1.25225	0.140116	1.25195	0.191605	1.2519	0.107938	1.25199	0.293836
1.25265	0.12131	1.25274	0.101769	1.25255	0.120801	1.25275	0.140319	1.25243	0.192297	1.2524	0.10817	1.25251	0.293098
1.25315	0.121563	1.25323	0.101953	1.25305	0.121284	1.25324	0.140379	1.25295	0.192745	1.25292	0.108255	1.25302	0.292455
1.25366	0.121653	1.25372	0.1019	1.25355	0.121654	1.25374	0.140443	1.25345	0.193192	1.25341	0.108317	1.25349	0.291766
1.25416	0.121713	1.25422	0.101936	1.25404	0.121958	1.25424	0.140531	1.25395	0.193499	1.25392	0.108345	1.25397	0.291171
1.25465	0.121861	1.25471	0.102129	1.25456	0.122304	1.25473	0.140673	1.25445	0.193843	1.25443	0.10859	1.25448	0.290767
1.25514	0.122126	1.2552	0.102326	1.25506	0.122394	1.25522	0.140749	1.25496	0.19431	1.25491	0.108951	1.25501	0.290442
1.25562	0.122298	1.25569	0.102527	1.25556	0.122499	1.25573	0.140745	1.25546	0.194765	1.2554	0.109275	1.25552	0.290103
1.25612	0.122505	1.25622	0.102775	1.25603	0.122939	1.25622	0.141013	1.25595	0.195221	1.25591	0.10937	1.25599	0.289725
1.25662	0.122673	1.25672	0.102953	1.25652	0.123409	1.25671	0.141296	1.25644	0.195732	1.2564	0.109571	1.25647	0.289387
1.25712	0.122789	1.25721	0.103045	1.25703	0.123791	1.25721	0.141397	1.25693	0.196095	1.25689	0.109757	1.25699	0.289052
1.25763	0.122899	1.25772	0.10313	1.25755	0.124111	1.25771	0.141437	1.25742	0.196444	1.25741	0.109885	1.2575	0.288775
1.25813	0.123003	1.2582	0.103158	1.25806	0.124285	1.25821	0.141443	1.25792	0.196752	1.2579	0.110038	1.25799	0.288519
1.25863	0.123151	1.25871	0.103229	1.25856	0.124455	1.25871	0.141455	1.25843	0.197129	1.25838	0.110226	1.25849	0.288288
1.25912	0.123363	1.25919	0.103208	1.25904	0.12466	1.25923	0.141563	1.25892	0.19743	1.25886	0.110322	1.25899	0.288099
1.25962	0.12357	1.25968	0.103331	1.25953	0.124991	1.25972	0.141727	1.25944	0.197682	1.25937	0.1104	1.25949	0.287853
1.26013	0.12379	1.26018	0.10352	1.26004	0.125459	1.26022	0.14196	1.25994	0.197955	1.2599	0.110651	1.26001	0.287654
1.26064	0.123987	1.26069	0.10367	1.26055	0.125859	1.26072	0.142119	1.26044	0.198298	1.26041	0.111044	1.26051	0.28744
1.26115	0.124088	1.26121	0.103801	1.26106	0.126007	1.2612	0.142276	1.26092	0.198616	1.26089	0.111348	1.261	0.287178
1.26164	0.12424	1.26175	0.103885	1.26155	0.125962	1.26171	0.142387	1.26143	0.198843	1.2614	0.111554	1.2615	0.286908
1.26213	0.124633	1.26223	0.103949	1.26202	0.126025	1.2622	0.142503	1.26192	0.198964	1.26191	0.111627	1.26198	0.286459
1.26263	0.124971	1.26272	0.10403	1.26253	0.126201	1.2627	0.142655	1.26242	0.199057	1.2624	0.111892	1.26249	0.285761
1.26312	0.125536	1.26321	0.104209	1.26304	0.126469	1.26321	0.142865	1.26295	0.199394	1.26289	0.111956	1.26298	0.284792
1.26363	0.125692	1.26372	0.104315	1.26355	0.126601	1.26372	0.143025	1.26345	0.199853	1.2634	0.111836	1.26348	0.283642
1.26413	0.125969	1.26422	0.104428	1.26405	0.126916	1.2642	0.143147	1.26394	0.200151	1.26389	0.111731	1.26399	0.282602
1.26463	0.12644	1.26471	0.10458	1.26456	0.127181	1.26471	0.143296	1.26445	0.200434	1.26438	0.111968	1.26449	0.281813
1.26513	0.127012	1.26521	0.104687	1.26506	0.127349	1.26524	0.143511	1.26496	0.200628	1.26488	0.112166	1.26498	0.280974
1.26563	0.127544	1.26571	0.104726	1.26554	0.12747	1.26575	0.143643	1.26547	0.200894	1.26539	0.112345	1.2655	0.27998
1.26613	0.128043	1.26622	0.104825	1.26604	0.127699	1.26623	0.143882	1.26595	0.201222	1.26589	0.112523	1.26598	0.278835
1.26663	0.128177	1.26673	0.104916	1.26655	0.127816	1.26672	0.144083	1.26646	0.201501	1.26639	0.112842	1.26647	0.277684
1.26712	0.128293	1.26723	0.105012	1.26704	0.12788	1.26722	0.144163	1.26695	0.201726	1.2669	0.112971	1.26697	0.276752
1.26762	0.128567	1.26774	0.105097	1.26754	0.127936	1.26772	0.144158	1.26745	0.201993	1.26741	0.113093	1.26749	0.275751
1.26813	0.129125	1.26824	0.105239	1.26803	0.128061	1.26823	0.144187	1.26793	0.202307	1.26791	0.113253	1.26799	0.275084
1.26863	0.129462	1.26875	0.105339	1.26852	0.128247	1.26874	0.144378	1.26842	0.202708	1.2684	0.113542	1.26848	0.274513
1.26913	0.129797	1.26924	0.10542	1.26904	0.128438	1.26925	0.144784	1.26893	0.20311	1.26888	0.113855	1.26899	0.274024
1.26963	0.130194	1.26971	0.105498	1.26953	0.12856	1.26972	0.145066	1.26943	0.203518	1.26939	0.114104	1.26952	0.273431
1.27012	0.130492	1.2702	0.105677	1.27003	0.128677	1.27018	0.145354	1.26995	0.203835	1.2699	0.1142	1.27001	0.272757
1.27063	0.130887	1.27071	0.105871	1.27054	0.128756	1.27069	0.145615	1.27044	0.204171	1.27042	0.114294	1.27048	0.272067
1.27113	0.131074	1.27118	0.105888	1.27103	0.128758	1.27121	0.145754	1.27092	0.204444	1.27092	0.114351	1.27099	0.271512
1.27162	0.131159	1.27166	0.105905	1.27153	0.128866	1.2717	0.145735	1.27142	0.204669	1.27141	0.114534	1.27148	0.270879
1.27213	0.131681	1.27218	0.105999	1.27205	0.129107	1.27221	0.146004	1.27192	0.204943	1.27191	0.114755	1.27198	0.270503
1.27263	0.132217	1.27268	0.106081	1.27254	0.129216	1.27272	0.146245	1.27243	0.205374	1.27239	0.115063	1.27251	0.27009
1.27312	0.132617	1.27319	0.106288	1.27305	0.129263	1.27322	0.146228	1.27295	0.205678	1.27288	0.115246	1.27302	0.269423
1.27362	0.132437	1.2737	0.106305	1.27356	0.129377	1.27372	0.146383	1.27346	0.205928	1.27338	0.115419	1.27352	0.268739
1.27413	0.132526	1.27422	0.106475	1.27405	0.129627	1.27426	0.146677	1.27395	0.20634	1.27389	0.115569	1.27403	0.268034
1.27463	0.132912	1.27474	0.106655	1.27453	0.12986	1.27478	0.147108	1.27444	0.206736	1.27438	0.115765	1.27451	0.267271
1.27514	0.133438	1.27523	0.106959	1.27502	0.129963	1.27528	0.147367	1.27494	0.207027	1.27489	0.1159	1.27499	0.266552
1.27564	0.133843	1.27568	0.106994	1.27554	0.130035	1.27579	0.147244	1.27546	0.207324	1.27539	0.116008	1.2755	0.265788
1.27613	0.134336	1.2762	0.106972	1.27604	0.130259	1.27629	0.147386	1.27596	0.207718	1.2759	0.116172	1.27602	0.26532
1.27663	0.134703	1.27675	0.107177	1.27653	0.130466	1.27679	0.14773	1.27646	0.208202	1.2764	0.116407	1.27651	0.264711
1.27714	0.134916	1.27727	0.10748	1.27701	0.130592	1.27725	0.14807	1.27696	0.208664	1.2769	0.116559	1.27698	0.264094
1.27763	0.135067	1.27779	0.107631	1.27752	0.130681	1.27775	0.148239	1.27744	0.209081	1.27739	0.116701	1.27748	0.263482
1.27813	0.135072	1.2783	0.107798	1.27802	0.130924	1.27823	0.148333	1.27793	0.209323	1.27792	0.116856	1.27797	0.26278
1.27862	0.135041	1.27878	0.107925	1.27853	0.131066	1.27872	0.148527	1.27843	0.209725	1.27841	0.117131	1.27847	0.262153
1.2791	0.13503	1.27925	0.107862	1.27902	0.13112	1.27919	0.148688	1.27893	0.21006	1.2789	0.117227	1.27897	0.261705
1.2796	0.135344	1.27972	0.107983	1.2795	0.131143	1.27969	0.148947	1.27942	0.210174	1.27939	0.1172	1.27945	0.261175
1.2801	0.135861	1.2802	0.108437	1.28003	0.131473	1.2802	0.14934	1.27992	0.210443	1.2799	0.117212	1.27994	0.260563
1.2806	0.136357	1.28072	0.108786	1.28056	0.131873	1.28072	0.149774	1.28043	0.210831	1.28041	0.117493	1.28045	0.260006
1.28112	0.136619	1.28126	0.109117	1.28107	0.132132	1.28124	0.150058	1.28095	0.211134	1.2809	0.117841	1.28097	0.259488
1.28162	0.136626	1.28176	0.109433	1.28154	0.13227	1.28174	0.150202	1.28142	0.211508	1.28138	0.118053	1.28149	0.259129
1.28212	0.136652	1.28223	0.109538	1.28203	0.132507	1.28225	0.150431	1.28191	0.211861	1.2819	0.118158	1.28199	0.258825
1.28262	0.136789	1.28271	0.109728	1.28254	0.132778	1.28273	0.150583	1.28243	0.212088	1.28241	0.118382	1.28247	0.258447
1.28312	0.136936	1.28316	0.110028	1.28302	0.133183	1.28321	0.150732	1.28293	0.212401	1.28291	0.118521	1.28295	0.258022
1.28362	0.136927	1.28365	0.110036	1.28349	0.133325	1.28369	0.150761	1.28343	0.212786	1.2834	0.11871	1.28346	0.25762
1.28414	0.137083	1.28419	0.110144	1.284	0.133557	1.2842	0.150989	1.28392	0.213114	1.28387	0.118907	1.28397	0.257344
1.28463	0.137453	1.28472	0.110474	1.28451	0.133797	1.28471	0.151307	1.28442	0.213508	1.28437	0.11926	1.28449	0.257188
1.28511	0.137809	1.28524	0.110966	1.285	0.133923	1.28521	0.151644	1.28492	0.213846	1.28488	0.119579	1.28498	0.257
1.28561	0.137983	1.28576	0.111377	1.2855	0.134258	1.2857	0.152036	1.28541	0.21413	1.28539	0.119993	1.28547	0.256762
1.28611	0.138104	1.28622	0.111672	1.28601	0.134698	1.2862	0.152484	1.28593	0.214455	1.2859	0.120243	1.28595	0.256457
1.28662	0.138122	1.2867	0.111804	1.28652	0.134886	1.28671	0.152758	1.28644	0.214787	1.28639	0.120389	1.28646	0.256157
1.28712	0.138148	1.28719	0.111717	1.28701	0.135038	1.28717	0.152841	1.28692	0.214957	1.28688	0.120777	1.28697	0.255909
1.28762	0.138325	1.28768	0.111819	1.28752	0.135254	1.28766	0.152911	1.2874	0.215104	1.28739	0.121136	1.28749	0.255551
1.2881	0.13858	1.28816	0.112074	1.28803	0.135719	1.28819	0.153002	1.28789	0.215401	1.28787	0.121559	1.28797	0.25523
1.28858	0.138672	1.28867	0.112292	1.28851	0.136011	1.28869	0.153191	1.28839	0.215758	1.28835	0.122102	1.28845	0.255028
1.28908	0.138899	1.2892	0.112554	1.28901	0.13633	1.2892	0.15357	1.2889	0.216202	1.28887	0.122493	1.28895	0.254683
1.28959	0.139174	1.2897	0.112857	1.28951	0.136608	1.2897	0.153948	1.28941	0.216515	1.28937	0.123006	1.28948	0.254161
1.2901	0.139352	1.29019	0.113265	1.29001	0.136761	1.29018	0.154294	1.2899	0.216876	1.28986	0.123206	1.28998	0.253376
1.2906	0.139514	1.29067	0.1135	1.2905	0.136915	1.29065	0.154454	1.2904	0.21732	1.29037	0.12353	1.29048	0.252644
1.29109	0.139704	1.29118	0.113622	1.29097	0.137193	1.29116	0.154546	1.2909	0.217715	1.29086	0.123995	1.29096	0.251956
1.29158	0.139861	1.29166	0.113898	1.29145	0.137389	1.29167	0.154751	1.29141	0.218067	1.29135	0.124411	1.29143	0.251159
1.29209	0.14009	1.29218	0.114364	1.29197	0.137776	1.29214	0.155114	1.29191	0.218397	1.29186	0.124821	1.29194	0.250531
1.2926	0.140266	1.29268	0.11458	1.2925	0.13807	1.29263	0.155506	1.29242	0.218882	1.29237	0.125427	1.29246	0.250067
1.29312	0.140401	1.29319	0.11474	1.29299	0.138204	1.29314	0.155563	1.29288	0.219337	1.29286	0.125881	1.29296	0.249286
1.29363	0.140477	1.29369	0.114833	1.29349	0.138379	1.29365	0.155536	1.29338	0.219798	1.29336	0.126327	1.29345	0.248459
1.29413	0.140666	1.29421	0.115108	1.29397	0.138626	1.29418	0.155812	1.29387	0.220416	1.29385	0.126513	1.29393	0.247559
1.2946	0.141059	1.29472	0.11539	1.29445	0.138806	1.29467	0.156173	1.29437	0.221028	1.29435	0.126781	1.29443	0.246741
1.29509	0.141873	1.29523	0.115787	1.29495	0.139016	1.29517	0.156518	1.29488	0.221688	1.29486	0.1266	1.29493	0.245728
1.2956	0.142454	1.29571	0.115933	1.29549	0.139273	1.29569	0.156671	1.29539	0.222471	1.29536	0.12622	1.29542	0.244735
1.2961	0.142806	1.29622	0.11623	1.29599	0.139712	1.29617	0.156999	1.29591	0.223187	1.29588	0.126277	1.29592	0.243969
1.2966	0.143051	1.29673	0.116599	1.29647	0.140051	1.29667	0.157316	1.29641	0.223902	1.29636	0.127029	1.29644	0.243609
1.2971	0.143287	1.29725	0.116966	1.29698	0.140371	1.29716	0.157609	1.2969	0.224544	1.29686	0.127434	1.29697	0.243231
1.2976	0.143545	1.29775	0.117126	1.2975	0.140613	1.29768	0.157774	1.2974	0.225095	1.29737	0.127886	1.29748	0.242829
1.29811	0.143805	1.29821	0.117166	1.29801	0.140825	1.29818	0.1578	1.29789	0.225501	1.29787	0.127995	1.29797	0.242468
1.29862	0.143854	1.29868	0.11712	1.29851	0.140916	1.29869	0.157828	1.29839	0.225852	1.29837	0.128391	1.29847	0.242085
1.29911	0.144148	1.29916	0.117251	1.299	0.141108	1.2992	0.158119	1.29891	0.226332	1.29887	0.128836	1.29898	0.241633
1.29961	0.144648	1.29969	0.117546	1.29947	0.141315	1.2997	0.158513	1.29942	0.226868	1.29937	0.129207	1.29946	0.24126
1.30011	0.145137	1.30021	0.11811	1.29996	0.141468	1.30018	0.158748	1.29992	0.22736	1.29986	0.129408	1.29995	0.240903
1.30062	0.145456	1.30071	0.118342	1.30047	0.141683	1.30067	0.158962	1.30043	0.227901	1.30037	0.129889	1.30044	0.240663
1.30111	0.145638	1.3012	0.118437	1.30098	0.142008	1.30117	0.159239	1.30093	0.228357	1.30087	0.130383	1.30095	0.240377
1.30161	0.145766	1.30169	0.118633	1.30149	0.142229	1.30167	0.159393	1.30142	0.228676	1.30138	0.130644	1.30145	0.239999
1.30211	0.146112	1.30219	0.119011	1.30199	0.142538	1.30219	0.159632	1.30193	0.229016	1.30187	0.130781	1.30195	0.239683
1.3026	0.146204	1.30271	0.119138	1.30252	0.14268	1.30269	0.159955	1.30242	0.229302	1.30237	0.130892	1.30243	0.239351
1.30309	0.146196	1.30321	0.119182	1.30303	0.142651	1.30318	0.159923	1.30291	0.229522	1.30288	0.13112	1.30294	0.238899
1.30358	0.146155	1.30371	0.119225	1.30352	0.142723	1.30367	0.159849	1.3034	0.229661	1.30336	0.131388	1.30346	0.238442
1.30408	0.146445	1.3042	0.119326	1.30401	0.142918	1.30416	0.160084	1.30389	0.229954	1.30386	0.131513	1.30397	0.238076
1.30459	0.146907	1.30468	0.119519	1.3045	0.143134	1.3047	0.160485	1.30439	0.230337	1.30437	0.131736	1.30449	0.237638
1.30511	0.147628	1.30518	0.119938	1.305	0.143418	1.3052	0.161136	1.30491	0.230662	1.30487	0.13197	1.30499	0.237164
1.30561	0.14812	1.30568	0.120172	1.30552	0.143612	1.30568	0.161493	1.30545	0.230933	1.30536	0.13215	1.30549	0.236739
1.30611	0.148322	1.3062	0.120344	1.30602	0.143823	1.3062	0.161785	1.30595	0.231145	1.30587	0.132265	1.30599	0.23614
1.30661	0.148333	1.3067	0.120466	1.3065	0.14394	1.30671	0.162118	1.30645	0.23139	1.30638	0.132367	1.30644	0.235594
1.3071	0.148443	1.30718	0.120603	1.30699	0.144096	1.30721	0.162392	1.30694	0.231639	1.30686	0.13253	1.30694	0.235076
1.30759	0.148596	1.30768	0.120622	1.30747	0.144303	1.3077	0.162553	1.30745	0.231867	1.30735	0.132651	1.30746	0.234517
1.3081	0.148777	1.3082	0.120902	1.30796	0.144644	1.30814	0.162596	1.30794	0.232075	1.30786	0.13276	1.30797	0.233967
1.3086	0.148885	1.3087	0.12108	1.30847	0.145101	1.30864	0.162967	1.30841	0.232567	1.30837	0.132899	1.30846	0.233518
1.30911	0.14915	1.30919	0.121213	1.309	0.14539	1.30914	0.163581	1.30891	0.232993	1.30887	0.133022	1.30897	0.233172
1.30961	0.149587	1.30967	0.121398	1.30951	0.145531	1.30964	0.164189	1.30943	0.233354	1.30937	0.133097	1.30947	0.232685
1.31011	0.150053	1.31015	0.121744	1.31001	0.1457	1.31013	0.164628	1.30992	0.233687	1.30987	0.133125	1.30997	0.232223
1.3106	0.150447	1.31069	0.12195	1.31049	0.145896	1.31065	0.164956	1.3104	0.234122	1.31036	0.133212	1.31047	0.231828
1.31109	0.150636	1.3112	0.122107	1.31097	0.146068	1.31117	0.165365	1.3109	0.234635	1.31085	0.133354	1.31095	0.231352
1.31159	0.150724	1.31169	0.122215	1.31149	0.146225	1.31168	0.165635	1.31142	0.235185	1.31136	0.13354	1.31145	0.230711
1.31209	0.150986	1.3122	0.122477	1.31201	0.146552	1.31215	0.165943	1.31192	0.235669	1.31185	0.133648	1.31195	0.230221
1.31258	0.15138	1.31271	0.122867	1.31253	0.146975	1.31266	0.166466	1.31243	0.236227	1.31236	0.133804	1.31245	0.229896
1.3131	0.151588	1.31316	0.123261	1.31304	0.147238	1.31318	0.166645	1.31294	0.236694	1.31286	0.133924	1.31293	0.229583
1.31361	0.151663	1.31366	0.123345	1.31353	0.147429	1.31369	0.166597	1.31344	0.23714	1.31338	0.134053	1.31345	0.229179
1.31411	0.151796	1.31419	0.123434	1.31399	0.147757	1.31417	0.166795	1.31394	0.237758	1.31387	0.134213	1.31396	0.228916
1.3146	0.152054	1.31469	0.123668	1.31449	0.148069	1.31468	0.167257	1.31443	0.23831	1.31437	0.134403	1.31447	0.22858
1.31509	0.152382	1.31517	0.124041	1.315	0.148403	1.31517	0.167876	1.31494	0.238789	1.31487	0.13457	1.31496	0.228224
1.31559	0.152678	1.31567	0.124382	1.31553	0.148667	1.3157	0.168221	1.31541	0.239452	1.31537	0.134744	1.31545	0.227878
1.3161	0.152882	1.31618	0.124638	1.31604	0.149033	1.31623	0.168642	1.31591	0.240148	1.31587	0.135049	1.31593	0.227528
1.3166	0.153029	1.31669	0.124872	1.31652	0.149417	1.31674	0.169103	1.31643	0.240707	1.31637	0.135294	1.31643	0.227293
1.31709	0.153231	1.31721	0.125035	1.31699	0.149782	1.31721	0.169439	1.31692	0.241249	1.31685	0.135452	1.31696	0.227159
1.31759	0.153466	1.31773	0.125129	1.31749	0.15017	1.31769	0.169629	1.31743	0.241793	1.31735	0.135664	1.31746	0.226954
1.31808	0.153627	1.31819	0.125363	1.318	0.15045	1.31818	0.169485	1.31791	0.242377	1.31787	0.135981	1.31794	0.226722
1.31858	0.153691	1.31867	0.125572	1.3185	0.150778	1.31867	0.169576	1.31841	0.242868	1.31839	0.136402	1.31843	0.226462
1.31909	0.153662	1.3192	0.125518	1.31902	0.151	1.31917	0.169873	1.3189	0.243351	1.3189	0.136898	1.31891	0.226338
1.31959	0.153716	1.3197	0.125704	1.31955	0.151207	1.31968	0.170268	1.31941	0.243623	1.31939	0.137408	1.31942	0.226254
1.32009	0.154114	1.32018	0.126283	1.32004	0.151798	1.32018	0.170755	1.31988	0.24403	1.31987	0.137768	1.31992	0.226058
1.32058	0.15463	1.32068	0.126578	1.32051	0.152161	1.32068	0.171115	1.32037	0.244538	1.32035	0.138045	1.32042	0.225817
1.32109	0.154763	1.32118	0.126785	1.32099	0.152435	1.32117	0.171311	1.32089	0.244992	1.32084	0.138273	1.32094	0.225626
1.3216	0.154872	1.32168	0.127084	1.32148	0.15258	1.32166	0.17151	1.3214	0.245426	1.32134	0.138555	1.32146	0.225492
1.3221	0.155159	1.32218	0.127488	1.32195	0.152693	1.32214	0.171659	1.32188	0.245763	1.32184	0.13895	1.32194	0.22534
1.32259	0.15538	1.32268	0.127818	1.32247	0.152754	1.32264	0.171719	1.32239	0.246082	1.32235	0.139457	1.32241	0.22506
1.32308	0.155667	1.32319	0.128027	1.32298	0.152782	1.32316	0.17172	1.3229	0.246391	1.32284	0.13969	1.3229	0.224801
1.32359	0.155656	1.32368	0.128138	1.32349	0.153261	1.32368	0.171732	1.32341	0.246826	1.32335	0.139935	1.32344	0.224487
1.3241	0.155861	1.32417	0.128506	1.32399	0.153697	1.32418	0.172016	1.32391	0.24724	1.32386	0.140246	1.32393	0.224207
1.3246	0.156482	1.32468	0.128853	1.32446	0.154308	1.32463	0.172437	1.32441	0.247671	1.32435	0.140647	1.32443	0.224103
1.32508	0.156975	1.32518	0.129471	1.32499	0.154798	1.3251	0.172714	1.32489	0.248263	1.32484	0.141078	1.32494	0.224067
1.32558	0.157491	1.32571	0.129769	1.3255	0.155061	1.32564	0.172856	1.32537	0.248829	1.32533	0.141425	1.32543	0.223795
1.32609	0.157716	1.32621	0.129825	1.326	0.155265	1.32618	0.172934	1.32587	0.24938	1.32583	0.141744	1.32593	0.223337
1.32658	0.157786	1.32669	0.130022	1.32648	0.155547	1.32667	0.173019	1.32638	0.250059	1.32633	0.142044	1.32644	0.222778
1.32708	0.158343	1.32718	0.130397	1.32695	0.155916	1.32715	0.173238	1.32688	0.251004	1.32683	0.142178	1.32694	0.222242
1.32759	0.158807	1.32768	0.130646	1.32746	0.156137	1.32765	0.17344	1.3274	0.252037	1.32733	0.142149	1.32742	0.22159
1.32809	0.159031	1.32816	0.131013	1.32797	0.156351	1.32818	0.173531	1.32791	0.252967	1.32784	0.142239	1.3279	0.221172
1.3286	0.159338	1.32864	0.131353	1.32848	0.156739	1.32867	0.173543	1.3284	0.253958	1.32835	0.142594	1.32839	0.22069
1.32909	0.159607	1.32917	0.13136	1.32899	0.157135	1.32918	0.173635	1.3289	0.254833	1.32884	0.142987	1.32891	0.220472
1.32958	0.159987	1.32968	0.131562	1.32949	0.157422	1.32966	0.173856	1.32941	0.255495	1.32934	0.143353	1.32944	0.22026
1.33009	0.160449	1.33016	0.13221	1.32997	0.157564	1.33015	0.17403	1.32989	0.256181	1.32985	0.143746	1.32995	0.219807
1.33058	0.16091	1.33067	0.132653	1.33048	0.157522	1.33064	0.17409	1.33038	0.256971	1.33038	0.1441	1.33045	0.219035
1.33108	0.161307	1.3312	0.132795	1.33099	0.157658	1.33116	0.174238	1.33089	0.257801	1.33088	0.14435	1.33092	0.218459
1.33159	0.161574	1.3317	0.13287	1.3315	0.157855	1.33169	0.174475	1.33139	0.258457	1.33135	0.144587	1.3314	0.217888
1.33208	0.161904	1.33218	0.133125	1.33203	0.158126	1.3322	0.174685	1.3319	0.259194	1.33184	0.144968	1.33192	0.217632
1.33257	0.162401	1.33267	0.133366	1.33255	0.158428	1.33271	0.174801	1.33241	0.259987	1.33235	0.145354	1.33243	0.217328
1.33308	0.162766	1.33317	0.133533	1.33306	0.158625	1.33317	0.174788	1.33289	0.260591	1.33285	0.145647	1.33294	0.217174
1.33359	0.162768	1.3337	0.133435	1.33355	0.158708	1.33368	0.174783	1.33337	0.261042	1.33336	0.14593	1.33345	0.216782
1.33408	0.162902	1.33419	0.133352	1.33403	0.158738	1.33421	0.175025	1.33388	0.261453	1.33388	0.146187	1.33395	0.216132
1.33458	0.163301	1.33469	0.13349	1.3345	0.158789	1.3347	0.175263	1.33441	0.261863	1.33437	0.146376	1.33441	0.215553
1.33507	0.163831	1.33518	0.133929	1.33499	0.158941	1.33517	0.175456	1.33491	0.262279	1.33485	0.146638	1.33491	0.215262
1.33557	0.164239	1.3357	0.134157	1.33547	0.159053	1.33565	0.175612	1.33539	0.262752	1.33533	0.147009	1.33542	0.215117
1.33608	0.164584	1.3362	0.134325	1.33598	0.15921	1.33618	0.175715	1.33588	0.263222	1.33584	0.147281	1.33593	0.214925
1.33659	0.164814	1.33669	0.134494	1.3365	0.159338	1.3367	0.175939	1.33637	0.263765	1.33633	0.147637	1.33644	0.214622
1.33709	0.165016	1.33717	0.134668	1.33701	0.159416	1.33716	0.176102	1.33687	0.26445	1.33683	0.147924	1.33692	0.214299
1.33759	0.165252	1.33766	0.134753	1.33748	0.159486	1.33767	0.176192	1.3374	0.264973	1.33735	0.148258	1.33743	0.213856
1.33809	0.165437	1.33816	0.134906	1.33797	0.159603	1.33815	0.17621	1.3379	0.265539	1.33786	0.148588	1.33792	0.213347
1.33858	0.165611	1.33864	0.135055	1.33847	0.159707	1.33863	0.176331	1.33841	0.266313	1.33833	0.148865	1.33841	0.213047
1.33907	0.165713	1.33914	0.135174	1.33898	0.159766	1.33913	0.176518	1.3389	0.266972	1.33883	0.149029	1.33889	0.212671
1.33958	0.166014	1.33963	0.135251	1.33949	0.159828	1.33964	0.176931	1.3394	0.267639	1.33934	0.149204	1.33942	0.212202
1.34008	0.166504	1.34013	0.13555	1.33999	0.15993	1.34015	0.177336	1.3399	0.268504	1.33985	0.149514	1.33991	0.211729
1.34058	0.167041	1.34067	0.135736	1.34051	0.160059	1.34066	0.177787	1.34041	0.26947	1.34036	0.150046	1.3404	0.211473
1.34108	0.167333	1.34119	0.135815	1.341	0.160239	1.34117	0.178203	1.34089	0.27033	1.34085	0.150575	1.34091	0.211436
1.34158	0.167433	1.34171	0.135856	1.3415	0.160333	1.34167	0.178382	1.3414	0.271225	1.34135	0.151058	1.34143	0.211302
1.34208	0.167415	1.34221	0.135895	1.342	0.160409	1.34218	0.178591	1.3419	0.27205	1.34186	0.151335	1.34193	0.210956
1.34258	0.167489	1.34268	0.135966	1.34249	0.160506	1.3427	0.178804	1.34238	0.272643	1.34234	0.151589	1.34242	0.210519
1.34308	0.167681	1.34316	0.136034	1.34298	0.160647	1.34321	0.178747	1.34287	0.273318	1.34284	0.151798	1.34292	0.210254
1.34358	0.167736	1.34368	0.136159	1.34348	0.160775	1.3437	0.178686	1.3434	0.274142	1.34334	0.152009	1.34342	0.210033
1.34409	0.167842	1.3442	0.136366	1.34399	0.161021	1.34417	0.179083	1.34393	0.275102	1.34385	0.152254	1.34392	0.209885
1.3446	0.168106	1.34471	0.136441	1.3445	0.161079	1.34467	0.17955	1.34444	0.276034	1.34436	0.152824	1.34443	0.209731
1.34509	0.168413	1.34523	0.136686	1.34501	0.161074	1.34517	0.179956	1.34493	0.276722	1.34487	0.153351	1.34491	0.209372
1.34558	0.168662	1.34573	0.136829	1.3455	0.161047	1.34571	0.1803	1.34543	0.277412	1.34536	0.153641	1.34541	0.209025
1.34609	0.168784	1.34623	0.136984	1.34597	0.161163	1.34622	0.180585	1.34591	0.278141	1.34584	0.153892	1.3459	0.208746
1.34659	0.168788	1.34671	0.137089	1.34647	0.161412	1.34668	0.180776	1.3464	0.27895	1.34635	0.1543	1.3464	0.208535
1.34711	0.168765	1.34719	0.137063	1.34699	0.161634	1.34714	0.181077	1.34691	0.279806	1.34686	0.15465	1.34691	0.20824
1.34761	0.168859	1.34767	0.137083	1.34748	0.161825	1.34764	0.181088	1.34742	0.28075	1.34737	0.155172	1.34742	0.207986
1.34811	0.169019	1.34817	0.137163	1.34799	0.162066	1.34817	0.180953	1.34792	0.281869	1.34786	0.15561	1.34794	0.207899
1.3486	0.169126	1.34866	0.137327	1.3485	0.162256	1.34868	0.180946	1.34841	0.283482	1.34836	0.156149	1.34845	0.20785
1.3491	0.169161	1.34916	0.137421	1.34899	0.162548	1.34917	0.181264	1.34892	0.285056	1.34886	0.156756	1.34893	0.207662
1.34961	0.16929	1.34968	0.13753	1.34948	0.16271	1.34968	0.181709	1.34942	0.286483	1.34939	0.157289	1.34942	0.207402
1.3501	0.1695	1.35022	0.137989	1.34997	0.162874	1.35017	0.18208	1.34992	0.287703	1.34988	0.157693	1.34993	0.207149
1.3506	0.169732	1.35073	0.138239	1.35048	0.163085	1.35065	0.182411	1.35042	0.288789	1.35038	0.15807	1.35042	0.206896
1.35109	0.169844	1.35121	0.1382	1.35098	0.163128	1.35115	0.182452	1.35091	0.289843	1.35087	0.158607	1.3509	0.206575
1.35158	0.169831	1.3517	0.138159	1.35146	0.163168	1.35166	0.182593	1.3514	0.290851	1.35136	0.159157	1.35142	0.206302
1.35208	0.169943	1.35222	0.13828	1.35196	0.163477	1.35215	0.183038	1.35188	0.291692	1.35185	0.159522	1.35192	0.205908
1.3526	0.170149	1.3527	0.138306	1.35245	0.16385	1.35264	0.183477	1.35238	0.292321	1.35235	0.160169	1.35242	0.205821
1.35309	0.170252	1.35316	0.138506	1.35296	0.164181	1.35316	0.183529	1.3529	0.292763	1.35286	0.160726	1.35292	0.205708
1.35359	0.170313	1.35366	0.13856	1.35348	0.164443	1.35366	0.183571	1.3534	0.293074	1.35336	0.160916	1.35342	0.205499
1.35408	0.170359	1.35417	0.138584	1.35399	0.164782	1.35416	0.183871	1.35391	0.293349	1.35386	0.161124	1.35391	0.205264
1.3546	0.170517	1.35466	0.13872	1.35448	0.165074	1.35467	0.184192	1.35442	0.293658	1.35435	0.161323	1.3544	0.205164
1.35511	0.170846	1.35516	0.139151	1.35497	0.165292	1.35517	0.184549	1.35492	0.2941	1.35485	0.161662	1.35493	0.204932
1.35561	0.171147	1.35569	0.139429	1.35549	0.165534	1.35569	0.184847	1.35543	0.29463	1.35535	0.161841	1.35544	0.204567
1.3561	0.171385	1.3562	0.139695	1.35596	0.165818	1.3562	0.18518	1.35591	0.295248	1.35585	0.162046	1.35597	0.204227
1.35659	0.171535	1.35667	0.140064	1.35647	0.165997	1.35669	0.185526	1.3564	0.296059	1.35634	0.162318	1.35645	0.204062
1.35708	0.17167	1.35715	0.140187	1.357	0.166307	1.35717	0.18578	1.35691	0.296854	1.35683	0.162656	1.35693	0.203969
1.35758	0.171787	1.35766	0.140295	1.3575	0.16664	1.35767	0.185978	1.35739	0.297692	1.35735	0.162942	1.35743	0.203807
1.35809	0.172014	1.35817	0.140602	1.35798	0.166967	1.35818	0.186118	1.35788	0.298646	1.35786	0.163117	1.35791	0.203652
1.35858	0.172108	1.35868	0.140783	1.35847	0.16736	1.35867	0.186082	1.35839	0.29968	1.35836	0.163187	1.3584	0.203315
1.35909	0.172382	1.35919	0.141178	1.35898	0.167907	1.35917	0.186316	1.35891	0.300773	1.35886	0.163296	1.35891	0.202827
1.35958	0.172832	1.35971	0.141423	1.3595	0.168262	1.35969	0.186853	1.35943	0.301831	1.35936	0.163246	1.35942	0.202261
1.36008	0.173371	1.36023	0.141831	1.36001	0.168589	1.36021	0.187353	1.35991	0.302886	1.35986	0.163318	1.35994	0.201836
1.36058	0.173872	1.36072	0.142238	1.36053	0.168845	1.36072	0.187563	1.36041	0.304113	1.36036	0.163512	1.36045	0.201586
1.36109	0.174095	1.36119	0.142451	1.361	0.168985	1.3612	0.18765	1.3609	0.305117	1.36086	0.163726	1.36093	0.201269
1.36159	0.174181	1.36165	0.142609	1.36151	0.169133	1.36169	0.187758	1.36139	0.30594	1.36136	0.163864	1.36143	0.200865
1.36208	0.174225	1.36214	0.142731	1.36202	0.169471	1.36217	0.188025	1.36189	0.306806	1.36185	0.163964	1.36192	0.200696
1.36258	0.174357	1.36266	0.14286	1.3625	0.169804	1.36267	0.188249	1.3624	0.307571	1.36234	0.164031	1.36243	0.200736
1.36309	0.174614	1.36318	0.143052	1.36299	0.170136	1.36317	0.188288	1.36292	0.308342	1.36285	0.164148	1.36294	0.200584
1.3636	0.174886	1.36371	0.143119	1.36352	0.170353	1.3637	0.188419	1.3634	0.309103	1.36336	0.164261	1.36344	0.2003
1.3641	0.175048	1.36418	0.143125	1.36402	0.170592	1.36421	0.188673	1.36391	0.309903	1.36385	0.164387	1.36393	0.200098
1.36461	0.175442	1.36466	0.143278	1.36452	0.170899	1.36469	0.18893	1.36442	0.310797	1.36435	0.164494	1.36441	0.199828
1.36511	0.176138	1.36517	0.143664	1.36502	0.171262	1.36518	0.189103	1.36493	0.311806	1.36486	0.164622	1.36492	0.199596
1.36561	0.176567	1.36566	0.143909	1.36551	0.171521	1.36568	0.189287	1.36542	0.312817	1.36536	0.164728	1.36543	0.199415
1.36612	0.176795	1.36615	0.144021	1.366	0.171758	1.36619	0.189445	1.36591	0.313908	1.36588	0.164815	1.36593	0.199169
1.36663	0.176864	1.36665	0.144271	1.36649	0.171988	1.36671	0.189789	1.3664	0.31515	1.36638	0.164979	1.36641	0.198844
1.36711	0.176858	1.36718	0.144515	1.36697	0.17211	1.36721	0.18994	1.3669	0.316409	1.36686	0.165326	1.36689	0.198849
1.3676	0.176855	1.36769	0.144695	1.36748	0.17217	1.36769	0.189876	1.36741	0.317326	1.36735	0.165648	1.36739	0.1988
1.3681	0.177145	1.36819	0.145016	1.36801	0.172378	1.3682	0.189847	1.36791	0.318515	1.36785	0.165838	1.36792	0.198664
1.36861	0.177247	1.36866	0.145303	1.36852	0.172643	1.3687	0.189887	1.3684	0.319941	1.36836	0.16609	1.36847	0.198519
1.3691	0.177304	1.36917	0.145389	1.369	0.172983	1.36919	0.190019	1.3689	0.321234	1.36886	0.166301	1.36897	0.198223
1.36959	0.177801	1.36971	0.145504	1.36949	0.173337	1.36966	0.190409	1.36941	0.322292	1.36936	0.166483	1.36946	0.197875
1.3701	0.178295	1.37019	0.146075	1.36999	0.173544	1.37015	0.190755	1.36991	0.322957	1.36986	0.166772	1.36993	0.197819
1.37059	0.178577	1.37066	0.146392	1.37048	0.173673	1.37067	0.191004	1.37039	0.323464	1.37038	0.166953	1.37044	0.19761
1.37109	0.178778	1.37117	0.146529	1.371	0.173892	1.3712	0.19131	1.3709	0.323991	1.37088	0.16724	1.37093	0.197309
1.37158	0.178935	1.37168	0.146594	1.37153	0.174019	1.37169	0.191532	1.37143	0.324546	1.37138	0.167408	1.37142	0.197029
1.37208	0.179243	1.37219	0.146794	1.37202	0.174346	1.37219	0.191802	1.37192	0.325084	1.37186	0.1676	1.37192	0.196903
1.37259	0.179595	1.37273	0.14711	1.37251	0.174778	1.37268	0.192238	1.3724	0.325755	1.37237	0.168076	1.37243	0.196936
1.3731	0.179994	1.37325	0.147359	1.37301	0.175038	1.37319	0.192368	1.37291	0.326488	1.37288	0.168516	1.37295	0.1969
1.3736	0.180121	1.37374	0.147441	1.3735	0.175143	1.37369	0.192228	1.3734	0.32716	1.37336	0.168723	1.37346	0.196728
1.37409	0.180171	1.37424	0.147339	1.37399	0.175222	1.37419	0.192398	1.3739	0.328005	1.37385	0.168942	1.37393	0.196535
1.37458	0.180471	1.37473	0.147492	1.37449	0.175418	1.37468	0.192764	1.37441	0.328907	1.37436	0.169168	1.37442	0.19635
1.37508	0.180878	1.3752	0.147894	1.37498	0.175764	1.37518	0.193097	1.37491	0.329807	1.37488	0.169415	1.37494	0.196187
1.37558	0.181117	1.37569	0.148206	1.37549	0.17595	1.37567	0.193288	1.3754	0.330838	1.37536	0.169802	1.37544	0.195972
1.37609	0.181388	1.37614	0.148545	1.376	0.17627	1.37616	0.193678	1.37591	0.331879	1.37585	0.170082	1.37593	0.195826
1.37659	0.181566	1.37664	0.148592	1.37649	0.176511	1.37666	0.194144	1.37641	0.332936	1.37635	0.170507	1.37643	0.195723
1.37709	0.181669	1.37717	0.148737	1.37699	0.176646	1.37716	0.194437	1.37689	0.333839	1.37686	0.170865	1.37695	0.195619
1.37759	0.181891	1.37768	0.148979	1.37749	0.176781	1.37766	0.194578	1.37742	0.334812	1.37737	0.171236	1.37744	0.195548
1.37809	0.182194	1.37816	0.149289	1.37799	0.177021	1.37816	0.194506	1.37791	0.335788	1.37786	0.171537	1.37793	0.195432
1.37859	0.182319	1.3787	0.149451	1.37849	0.177291	1.37866	0.194491	1.3784	0.336675	1.37837	0.171737	1.37844	0.195339
1.3791	0.182325	1.37922	0.149442	1.37899	0.17758	1.37916	0.194834	1.3789	0.337388	1.37886	0.171852	1.37896	0.195244
1.37962	0.182549	1.37971	0.149425	1.37948	0.177753	1.37968	0.195301	1.3794	0.338062	1.37935	0.172188	1.37948	0.195111
1.38011	0.183019	1.38021	0.149766	1.37998	0.178002	1.38019	0.195851	1.3799	0.338901	1.37987	0.172525	1.37998	0.194961
1.38059	0.183479	1.38071	0.150069	1.38048	0.17843	1.38068	0.196421	1.38042	0.339764	1.38038	0.17301	1.38045	0.19487
1.38108	0.183712	1.38119	0.150271	1.38098	0.178759	1.38117	0.196884	1.38092	0.34056	1.38088	0.173373	1.38093	0.194816
1.38159	0.183705	1.38167	0.150362	1.3815	0.179007	1.38165	0.197087	1.38141	0.341375	1.38136	0.173843	1.38143	0.194711
1.3821	0.183858	1.38217	0.150543	1.38201	0.179337	1.38217	0.197218	1.38192	0.342182	1.38185	0.174059	1.38194	0.194615
1.38261	0.183959	1.38266	0.150713	1.38249	0.179671	1.3827	0.197285	1.38241	0.343087	1.38236	0.174178	1.38245	0.194556
1.38309	0.184069	1.38319	0.150849	1.38299	0.179916	1.38321	0.197023	1.3829	0.344064	1.38286	0.174363	1.38293	0.19451
1.38357	0.18411	1.3837	0.15094	1.38349	0.180068	1.38368	0.196924	1.38339	0.345034	1.38337	0.174708	1.38342	0.194432
1.38409	0.184153	1.38417	0.151085	1.38399	0.180412	1.38418	0.197621	1.38388	0.346293	1.38388	0.175023	1.38393	0.194298
1.38458	0.184415	1.38465	0.151258	1.38449	0.180742	1.38467	0.198286	1.38437	0.347842	1.38437	0.175519	1.38443	0.194261
1.38508	0.184781	1.38517	0.151481	1.38498	0.181139	1.38516	0.198819	1.38487	0.349239	1.38485	0.175838	1.38494	0.194209
1.38558	0.185154	1.38564	0.151602	1.38548	0.18147	1.38569	0.199173	1.38539	0.350342	1.38535	0.176032	1.38543	0.194118
1.38608	0.1854	1.38615	0.151745	1.38598	0.18188	1.3862	0.199397	1.3859	0.351309	1.38586	0.176237	1.38591	0.194034
1.38658	0.185543	1.38665	0.151847	1.38649	0.182122	1.38671	0.199504	1.38637	0.352139	1.38638	0.176579	1.38642	0.19392
1.38708	0.185706	1.38719	0.152033	1.38698	0.18253	1.38717	0.199783	1.38688	0.353093	1.38687	0.176882	1.38691	0.193719
1.38757	0.185927	1.38771	0.152108	1.38747	0.182915	1.38765	0.200145	1.38738	0.353699	1.38736	0.177045	1.38741	0.193621
1.38807	0.186284	1.3882	0.152407	1.38794	0.183478	1.38815	0.200465	1.38789	0.35427	1.38785	0.177125	1.38792	0.193535
1.38858	0.186404	1.38869	0.152677	1.38847	0.183957	1.38865	0.200692	1.3884	0.35475	1.38834	0.177514	1.38843	0.19351
1.38909	0.186532	1.38921	0.152704	1.38898	0.18451	1.38915	0.201101	1.38889	0.355182	1.38884	0.17788	1.38893	0.1934
1.38959	0.18671	1.38969	0.152891	1.38951	0.184886	1.38968	0.201425	1.38939	0.355472	1.38933	0.178125	1.38943	0.193226
1.39009	0.187177	1.39016	0.153352	1.39003	0.185083	1.39019	0.201542	1.3899	0.355715	1.38985	0.178276	1.38993	0.192994
1.39058	0.187743	1.39064	0.153602	1.39051	0.185438	1.39068	0.201717	1.3904	0.355947	1.39036	0.178509	1.39041	0.19286
1.39108	0.188402	1.39115	0.154086	1.39098	0.185858	1.39116	0.20207	1.39092	0.356347	1.39086	0.178541	1.39092	0.192516
1.39158	0.188698	1.39168	0.154467	1.39148	0.186169	1.39167	0.202283	1.39141	0.356889	1.39135	0.178501	1.39142	0.192091
1.39209	0.189089	1.39217	0.154816	1.39197	0.186595	1.39219	0.2027	1.39189	0.357473	1.39186	0.178523	1.39194	0.191981
1.3926	0.189439	1.39268	0.155094	1.3925	0.187205	1.3927	0.203114	1.39237	0.358153	1.39236	0.178801	1.39242	0.192066
1.3931	0.189778	1.39321	0.155367	1.39303	0.187665	1.39318	0.203203	1.39287	0.358633	1.39285	0.179084	1.39292	0.191849
1.3936	0.189906	1.3937	0.155545	1.39351	0.18798	1.39367	0.203207	1.39338	0.359039	1.39337	0.179355	1.39343	0.19164
1.39411	0.189965	1.39419	0.155525	1.394	0.188082	1.39415	0.203398	1.39389	0.359591	1.39387	0.179499	1.39393	0.191347
1.39462	0.190417	1.39469	0.155795	1.39449	0.188262	1.39466	0.203648	1.3944	0.360204	1.39434	0.179757	1.39444	0.191001
1.39512	0.191057	1.3952	0.156323	1.39501	0.188596	1.39519	0.203956	1.39491	0.36077	1.39485	0.179914	1.39493	0.190764
1.3956	0.19142	1.39568	0.1566	1.39551	0.188769	1.3957	0.204107	1.39543	0.361356	1.39537	0.180025	1.39541	0.190574
1.39609	0.191846	1.39617	0.156904	1.396	0.189113	1.39621	0.204326	1.3959	0.361933	1.39588	0.180182	1.39589	0.190334
1.39659	0.192055	1.39668	0.157454	1.39651	0.189592	1.39671	0.204594	1.39639	0.362533	1.39637	0.180564	1.39641	0.190283
1.39709	0.192303	1.39722	0.157779	1.39702	0.189835	1.3972	0.20478	1.39692	0.363094	1.39687	0.180897	1.39693	0.190179
1.3976	0.192581	1.39772	0.157982	1.39751	0.189977	1.39768	0.204817	1.39741	0.363563	1.39736	0.181142	1.39743	0.189939
1.3981	0.1929	1.39817	0.158233	1.39799	0.190178	1.39815	0.204778	1.39791	0.364048	1.39786	0.181318	1.39793	0.189653
1.39861	0.192938	1.39864	0.158397	1.39847	0.190451	1.39864	0.20483	1.39842	0.364637	1.39835	0.181444	1.39843	0.189322
1.3991	0.192821	1.39916	0.158465	1.39898	0.190749	1.39916	0.205089	1.39891	0.36509	1.39887	0.181749	1.39894	0.189031
1.3996	0.193097	1.39967	0.158861	1.3995	0.190882	1.39966	0.205379	1.39941	0.365649	1.39937	0.182391	1.39944	0.188775
1.4001	0.193977	1.40019	0.159709	1.39999	0.191101	1.40017	0.205559	1.39989	0.366053	1.39988	0.182801	1.39994	0.188582
1.40059	0.194781	1.40066	0.160293	1.40049	0.191381	1.40066	0.205728	1.40038	0.366601	1.40038	0.183309	1.40042	0.188632
1.40109	0.195144	1.40117	0.16046	1.40099	0.191613	1.40114	0.205919	1.40091	0.367051	1.40087	0.18345	1.40092	0.188478
1.40157	0.195299	1.40164	0.160593	1.40149	0.191818	1.40164	0.206076	1.40142	0.367346	1.40138	0.183667	1.4014	0.188072
1.40207	0.195705	1.40213	0.160871	1.402	0.192073	1.40214	0.206362	1.4019	0.367703	1.40188	0.183887	1.40191	0.187707
1.40258	0.196029	1.40268	0.161103	1.40251	0.192287	1.40264	0.206481	1.40237	0.368203	1.40239	0.184229	1.40242	0.18745
1.40309	0.196336	1.40318	0.161345	1.40299	0.192547	1.40314	0.206529	1.40289	0.368556	1.40287	0.184583	1.40292	0.187171
1.4036	0.196345	1.40368	0.161575	1.40349	0.192826	1.40365	0.206574	1.40338	0.36884	1.40333	0.184936	1.4034	0.18688
1.40409	0.196553	1.40418	0.161879	1.40398	0.193198	1.40415	0.206874	1.40387	0.36918	1.40384	0.185174	1.40392	0.186628
1.40459	0.197001	1.40468	0.162239	1.40447	0.193489	1.40464	0.207188	1.40439	0.369617	1.40434	0.185749	1.40443	0.186641
1.40509	0.197562	1.40518	0.162918	1.40497	0.193851	1.40516	0.207651	1.40492	0.369941	1.40483	0.186203	1.40494	0.186546
1.40558	0.19798	1.40569	0.163272	1.4055	0.194171	1.40569	0.207956	1.40543	0.370243	1.40533	0.186554	1.40542	0.186228
1.40608	0.1983	1.4062	0.163326	1.40601	0.194452	1.4062	0.208162	1.40592	0.370502	1.40584	0.186863	1.40592	0.185579
1.40658	0.198533	1.40672	0.163666	1.4065	0.194758	1.40667	0.208541	1.40639	0.37067	1.40636	0.187383	1.40642	0.185255
1.40708	0.198572	1.40721	0.163932	1.40698	0.195044	1.40715	0.208673	1.4069	0.370747	1.40688	0.1877	1.40693	0.185031
1.40758	0.198674	1.4077	0.164112	1.40747	0.195184	1.40766	0.208619	1.40741	0.370718	1.40738	0.187766	1.40742	0.184579
1.40809	0.198991	1.4082	0.16455	1.40795	0.195494	1.40819	0.208675	1.4079	0.370724	1.40787	0.187993	1.40791	0.184299
1.40859	0.199231	1.40868	0.164879	1.40846	0.196035	1.4087	0.209003	1.4084	0.371035	1.40836	0.188695	1.40842	0.184169
1.4091	0.199298	1.40919	0.164978	1.40897	0.196537	1.40919	0.209487	1.4089	0.371324	1.40886	0.189279	1.40893	0.183977
1.40959	0.199494	1.4097	0.165096	1.40948	0.197108	1.40969	0.209993	1.4094	0.371503	1.40935	0.189738	1.40943	0.183687
1.41007	0.199781	1.41019	0.165234	1.40998	0.197529	1.41018	0.210387	1.4099	0.371714	1.40984	0.190026	1.40993	0.183207
1.41057	0.200114	1.41068	0.165449	1.4105	0.197826	1.41065	0.21068	1.41039	0.371865	1.41033	0.190311	1.41043	0.182872
1.41107	0.200449	1.41118	0.165564	1.41099	0.198166	1.41114	0.210944	1.41087	0.371884	1.41084	0.190684	1.41093	0.182589
1.41157	0.200653	1.41168	0.165739	1.41146	0.198527	1.41168	0.211262	1.41138	0.371923	1.41135	0.191112	1.41145	0.182298
1.41208	0.200805	1.41217	0.166006	1.41194	0.199005	1.41217	0.211663	1.41188	0.37195	1.41184	0.191551	1.41194	0.182279
1.4126	0.200966	1.41267	0.166266	1.41245	0.199392	1.41267	0.211891	1.41238	0.372154	1.41236	0.192037	1.41243	0.18222
1.41311	0.201183	1.41318	0.166385	1.41295	0.199788	1.41317	0.211996	1.41287	0.372322	1.41286	0.192391	1.41293	0.182112
1.4136	0.20131	1.41366	0.166438	1.41347	0.200152	1.41367	0.211966	1.4134	0.372404	1.41336	0.19261	1.41343	0.181953
1.41408	0.20133	1.41415	0.16647	1.414	0.200492	1.41417	0.212293	1.41389	0.372569	1.41386	0.192833	1.41392	0.181713
1.41457	0.201613	1.41465	0.166495	1.41451	0.200852	1.41466	0.212797	1.41438	0.372678	1.41435	0.19303	1.4144	0.1815
1.41507	0.202	1.41517	0.166631	1.41502	0.201174	1.41516	0.213148	1.41488	0.372631	1.41484	0.193168	1.41489	0.181446
1.41556	0.202406	1.41569	0.166748	1.41552	0.201471	1.41566	0.213386	1.41539	0.372557	1.41535	0.193406	1.41541	0.181415
1.41604	0.202636	1.41615	0.166873	1.41601	0.201927	1.41614	0.213781	1.41589	0.372494	1.41585	0.193607	1.41591	0.181217
1.41654	0.202755	1.41664	0.16703	1.41649	0.202305	1.41662	0.214097	1.41638	0.372632	1.41632	0.193872	1.41639	0.181046
1.41705	0.20301	1.41713	0.16718	1.41697	0.202676	1.41714	0.214299	1.41688	0.372665	1.41683	0.194097	1.41688	0.180805
1.41756	0.203131	1.41764	0.167317	1.41746	0.203064	1.41764	0.214607	1.41739	0.372597	1.41735	0.194239	1.41741	0.18055
1.41805	0.203533	1.41814	0.167477	1.41794	0.203516	1.41815	0.214897	1.41788	0.372522	1.41787	0.194366	1.41791	0.180299
1.41856	0.203704	1.41866	0.167578	1.41845	0.203917	1.41862	0.215016	1.41837	0.372591	1.41837	0.194549	1.41843	0.180071
1.41906	0.203827	1.41918	0.167656	1.41896	0.204183	1.41911	0.21534	1.41888	0.372585	1.41884	0.194725	1.41893	0.17992
1.41957	0.20404	1.41967	0.167678	1.41947	0.204452	1.41963	0.215828	1.41939	0.372544	1.41934	0.194825	1.41943	0.179748
1.42006	0.204665	1.42016	0.167916	1.41999	0.204825	1.42017	0.216352	1.41988	0.372409	1.41985	0.19493	1.41991	0.179609
1.42055	0.205218	1.42068	0.168182	1.42049	0.205187	1.42068	0.216726	1.42036	0.372408	1.42034	0.19511	1.42042	0.17959
1.42105	0.205624	1.42117	0.168335	1.42099	0.205541	1.42117	0.217009	1.42085	0.37241	1.42084	0.195285	1.42091	0.179409
1.42157	0.206027	1.42167	0.168469	1.42148	0.205949	1.42164	0.21732	1.42136	0.372379	1.42133	0.19545	1.4214	0.179179
1.42208	0.206443	1.42217	0.168693	1.42197	0.206239	1.42215	0.217609	1.42186	0.372299	1.42182	0.195531	1.4219	0.179053
1.42258	0.206688	1.42263	0.168829	1.42245	0.20647	1.42264	0.217836	1.42236	0.372225	1.42232	0.19563	1.4224	0.178831
1.42308	0.207367	1.42312	0.169436	1.42294	0.206973	1.42315	0.21812	1.42287	0.372173	1.42284	0.195615	1.42288	0.178531
1.42357	0.207766	1.42364	0.169822	1.42346	0.2074	1.42367	0.218234	1.42338	0.372377	1.42334	0.195507	1.42341	0.178294
1.42406	0.207973	1.42416	0.169955	1.42396	0.207786	1.42417	0.218479	1.42389	0.372453	1.42386	0.195488	1.42392	0.178118
1.42457	0.208422	1.42465	0.169953	1.42446	0.208297	1.4247	0.218969	1.42439	0.372419	1.42437	0.195615	1.42441	0.177995
1.42507	0.209021	1.42515	0.170281	1.42496	0.208767	1.4252	0.219541	1.42489	0.372301	1.42484	0.195697	1.42493	0.177835
1.42556	0.2097	1.42567	0.170695	1.42546	0.20905	1.42569	0.219855	1.42541	0.372085	1.42535	0.195817	1.42544	0.177635
1.42606	0.210243	1.42618	0.17098	1.42598	0.209329	1.42617	0.220115	1.42591	0.371806	1.42586	0.195929	1.42593	0.177384
1.42657	0.210497	1.42667	0.171277	1.42649	0.209836	1.42667	0.220356	1.42641	0.371552	1.42635	0.196089	1.42642	0.177235
1.42708	0.210839	1.42714	0.171537	1.42698	0.210479	1.42718	0.220664	1.4269	0.371425	1.42684	0.196279	1.4269	0.17711
1.42758	0.211083	1.42764	0.171758	1.42749	0.210982	1.42769	0.220916	1.4274	0.371445	1.42733	0.196423	1.42739	0.177058
1.42808	0.211528	1.42819	0.172009	1.428	0.211486	1.42821	0.221072	1.4279	0.371283	1.42784	0.196586	1.4279	0.176927
1.42857	0.211877	1.42872	0.172222	1.42852	0.211922	1.4287	0.221198	1.42841	0.371047	1.42834	0.196787	1.42841	0.176807
1.42907	0.211928	1.42924	0.172409	1.42903	0.21247	1.42915	0.221597	1.4289	0.370854	1.42884	0.196982	1.42891	0.176532
1.42958	0.212246	1.42974	0.172624	1.42952	0.21298	1.42962	0.222129	1.42941	0.370637	1.42933	0.197248	1.42941	0.176438
1.43006	0.212845	1.43018	0.173153	1.42999	0.213568	1.43016	0.222667	1.4299	0.370529	1.42985	0.197476	1.4299	0.176497
1.43057	0.213566	1.43068	0.17351	1.43046	0.214238	1.4307	0.223147	1.4304	0.37052	1.43036	0.197737	1.43039	0.176485
1.43107	0.213996	1.43122	0.173586	1.43095	0.214643	1.43121	0.223341	1.43089	0.37031	1.43086	0.198244	1.43091	0.176276
1.43158	0.214168	1.43173	0.173852	1.43148	0.215022	1.43169	0.223364	1.43137	0.369998	1.43135	0.198822	1.43141	0.176043
1.43207	0.214457	1.43219	0.174219	1.432	0.215754	1.43217	0.223572	1.43187	0.369747	1.43184	0.199176	1.43191	0.175847
1.43256	0.214826	1.43268	0.174512	1.43249	0.216556	1.43267	0.223935	1.43238	0.369637	1.43234	0.199641	1.43241	0.175781
1.43308	0.215298	1.43318	0.175005	1.433	0.217366	1.43317	0.224437	1.43289	0.369489	1.43284	0.199931	1.43291	0.175771
1.43358	0.215488	1.43366	0.175324	1.4335	0.21783	1.43365	0.224633	1.43338	0.369302	1.43335	0.200177	1.43343	0.175754
1.43408	0.215503	1.43415	0.175358	1.43398	0.218119	1.43416	0.22499	1.43388	0.36905	1.43385	0.20044	1.43394	0.175634
1.43457	0.215905	1.43464	0.175593	1.43448	0.21841	1.43466	0.225827	1.43439	0.368806	1.43436	0.200866	1.43443	0.175404
1.43506	0.216498	1.43516	0.176078	1.43498	0.218716	1.43514	0.226623	1.43489	0.368641	1.43485	0.201214	1.43492	0.17506
1.43557	0.217128	1.43568	0.176481	1.4355	0.219044	1.43566	0.227106	1.4354	0.368444	1.43536	0.201477	1.43541	0.174834
1.43606	0.217682	1.43619	0.176947	1.43599	0.219605	1.43616	0.22741	1.4359	0.368293	1.43585	0.201682	1.43592	0.174646
1.43657	0.218064	1.43665	0.177294	1.43649	0.220156	1.43667	0.227911	1.43638	0.36817	1.43634	0.202092	1.43643	0.174447
1.43708	0.218477	1.43715	0.177637	1.43699	0.220401	1.43716	0.228538	1.43689	0.367994	1.43685	0.202512	1.43693	0.174401
1.43758	0.219002	1.43765	0.17786	1.4375	0.220554	1.43765	0.229164	1.43741	0.367763	1.43735	0.203033	1.43744	0.174219
1.43807	0.219686	1.43818	0.178191	1.43798	0.220731	1.43814	0.22957	1.4379	0.367422	1.43785	0.203444	1.43793	0.174002
1.43857	0.219947	1.4387	0.178329	1.43849	0.220922	1.43864	0.229753	1.43838	0.367103	1.43837	0.203883	1.43843	0.173884
1.43907	0.220088	1.43915	0.178305	1.43898	0.221206	1.43914	0.230108	1.43889	0.366877	1.43886	0.204276	1.4389	0.173844
1.43957	0.2207	1.43967	0.178692	1.43947	0.221485	1.43966	0.230799	1.43938	0.366572	1.43934	0.204701	1.43938	0.173826
1.44007	0.221646	1.44019	0.179338	1.43996	0.221748	1.44015	0.231541	1.43987	0.36641	1.43984	0.205242	1.43989	0.173684
1.44057	0.222833	1.44067	0.179894	1.44047	0.221984	1.44066	0.232073	1.44038	0.366351	1.44035	0.205864	1.4404	0.17365
1.44107	0.223694	1.44116	0.180313	1.44097	0.222205	1.44116	0.232507	1.44091	0.366281	1.44085	0.206415	1.44089	0.173393
1.44158	0.224068	1.44169	0.180598	1.44148	0.222337	1.44166	0.232905	1.4414	0.366077	1.44135	0.206718	1.44142	0.173123
1.4421	0.224476	1.4422	0.180819	1.44196	0.222468	1.44216	0.233159	1.44188	0.365868	1.44185	0.207031	1.44193	0.173002
1.44261	0.224895	1.44268	0.181001	1.44246	0.222588	1.44267	0.233343	1.44238	0.36554	1.44234	0.207382	1.44243	0.172857
1.4431	0.225412	1.44318	0.18113	1.44298	0.22283	1.44317	0.233604	1.44289	0.365179	1.44283	0.207726	1.44292	0.172747
1.4436	0.22558	1.44366	0.181079	1.44346	0.223029	1.44369	0.233743	1.44341	0.364962	1.44335	0.208061	1.4434	0.172591
1.4441	0.225818	1.44416	0.181289	1.44396	0.223194	1.44417	0.233996	1.44391	0.364844	1.44386	0.208352	1.44389	0.172377
1.44459	0.226595	1.44465	0.181677	1.44446	0.223499	1.44466	0.234486	1.4444	0.364721	1.44438	0.208795	1.4444	0.172206
1.44507	0.227492	1.44516	0.182266	1.44497	0.22371	1.44516	0.234918	1.44489	0.364469	1.44485	0.209119	1.44491	0.172062
1.44559	0.228255	1.4457	0.18261	1.44548	0.223887	1.44564	0.235223	1.44539	0.364182	1.44534	0.209341	1.44544	0.171965
1.44609	0.228705	1.44618	0.182828	1.44599	0.224191	1.44613	0.235413	1.44587	0.364077	1.44584	0.209661	1.44592	0.171789
1.44659	0.228954	1.44665	0.18304	1.44648	0.224551	1.44664	0.235602	1.44638	0.363988	1.44634	0.209986	1.44641	0.171595
1.44707	0.229214	1.44716	0.18318	1.44699	0.224769	1.44713	0.235789	1.44689	0.363777	1.44685	0.210365	1.44686	0.17147
1.44756	0.229516	1.44765	0.183354	1.44749	0.2249	1.44765	0.235908	1.44741	0.363377	1.44735	0.210863	1.44735	0.171254
1.44805	0.230015	1.44816	0.18365	1.44797	0.225227	1.4482	0.236054	1.44791	0.363186	1.44786	0.211313	1.44787	0.170965
1.44856	0.230377	1.44869	0.183812	1.44846	0.225721	1.44871	0.236142	1.44841	0.363238	1.44836	0.211777	1.44838	0.170833
1.44907	0.230522	1.44919	0.183995	1.44896	0.226191	1.44919	0.236344	1.44888	0.363263	1.44885	0.212318	1.44887	0.170832
1.44956	0.230737	1.44966	0.184231	1.44948	0.226435	1.44966	0.236589	1.44936	0.363122	1.44935	0.212741	1.44939	0.170724
1.45005	0.231062	1.45016	0.184863	1.44996	0.226759	1.45016	0.236889	1.44984	0.363011	1.44983	0.212958	1.44989	0.170474
1.45055	0.231456	1.45067	0.185354	1.45046	0.227207	1.45065	0.237207	1.45034	0.363054	1.45032	0.213304	1.45038	0.170227
1.45105	0.231762	1.45116	0.185641	1.45096	0.227715	1.45114	0.237548	1.45085	0.363101	1.45082	0.213852	1.45088	0.170055
1.45156	0.231939	1.45164	0.185962	1.45145	0.228057	1.45163	0.237844	1.45137	0.363104	1.45135	0.214302	1.4514	0.169756
1.45207	0.232198	1.45215	0.186418	1.45192	0.228439	1.45213	0.23811	1.45189	0.363038	1.45186	0.214784	1.4519	0.169697
1.45258	0.232502	1.45263	0.186878	1.45243	0.22878	1.45266	0.238374	1.45239	0.362988	1.45236	0.215391	1.4524	0.169702
1.45307	0.232731	1.45312	0.187282	1.45296	0.229207	1.4532	0.238543	1.45288	0.362936	1.45285	0.21623	1.45289	0.169715
1.45357	0.232809	1.45362	0.187482	1.45346	0.229635	1.45371	0.238589	1.45338	0.362954	1.45334	0.216892	1.4534	0.169621
1.45406	0.232987	1.45415	0.18766	1.45394	0.230071	1.45419	0.238935	1.4539	0.362935	1.45382	0.217511	1.4539	0.169457
1.45457	0.233399	1.45468	0.188073	1.45444	0.230473	1.45465	0.239594	1.45439	0.362862	1.45433	0.218105	1.45441	0.169314
1.45507	0.234229	1.4552	0.189116	1.45495	0.230982	1.45511	0.240499	1.45488	0.362997	1.45484	0.218571	1.45491	0.168978
1.45557	0.235043	1.45565	0.189711	1.45547	0.231445	1.45561	0.241104	1.45538	0.363182	1.45532	0.2186	1.45541	0.168536
1.45607	0.235605	1.45613	0.190148	1.45596	0.231943	1.45616	0.241742	1.4559	0.363387	1.45583	0.218976	1.45589	0.168139
1.45656	0.235792	1.45662	0.190719	1.45646	0.232421	1.4567	0.242171	1.45642	0.363638	1.45635	0.219758	1.45639	0.167929
1.45706	0.236233	1.45714	0.191206	1.45697	0.232882	1.4572	0.242476	1.45691	0.363741	1.45685	0.220693	1.4569	0.167912
1.45758	0.236743	1.45766	0.191501	1.45749	0.23324	1.4577	0.242686	1.45738	0.363762	1.45735	0.221435	1.45743	0.167777
1.45809	0.237239	1.4582	0.191944	1.45799	0.233701	1.45816	0.242917	1.45786	0.363811	1.45785	0.222094	1.45792	0.167535
1.45859	0.237444	1.4587	0.192267	1.45849	0.234017	1.45863	0.243064	1.45839	0.364097	1.45834	0.222598	1.45841	0.167458
1.45909	0.237866	1.45923	0.192509	1.45898	0.234228	1.45912	0.24356	1.45891	0.364268	1.45883	0.223124	1.45892	0.167396
1.45958	0.238411	1.45971	0.192932	1.45947	0.234399	1.45965	0.244236	1.45942	0.364465	1.45933	0.223674	1.45945	0.167184
1.46008	0.239103	1.4602	0.193808	1.45998	0.234678	1.46017	0.244889	1.45993	0.364603	1.45984	0.224147	1.45993	0.166978
1.46058	0.239869	1.46067	0.194436	1.46049	0.234964	1.46067	0.245424	1.46041	0.364892	1.46036	0.22472	1.46042	0.166862
1.46109	0.240644	1.46119	0.194798	1.46098	0.235241	1.46116	0.245755	1.46089	0.365186	1.46088	0.225205	1.4609	0.166691
1.4616	0.24091	1.46171	0.195002	1.46147	0.235525	1.46166	0.246181	1.46139	0.365457	1.46138	0.225488	1.4614	0.166602
1.4621	0.241386	1.46221	0.195443	1.46199	0.235877	1.46214	0.246778	1.46189	0.365833	1.46185	0.225665	1.46191	0.166652
1.46259	0.241708	1.46269	0.19567	1.46248	0.236115	1.46265	0.247171	1.4624	0.366157	1.46234	0.225866	1.46244	0.166595
1.46308	0.241936	1.46313	0.195889	1.46297	0.236301	1.46316	0.247257	1.4629	0.366399	1.46284	0.2261	1.46293	0.166479
1.46359	0.242067	1.46365	0.196078	1.46347	0.236455	1.46366	0.247117	1.4634	0.366671	1.46335	0.226383	1.46341	0.166427
1.46409	0.24236	1.46417	0.196518	1.46397	0.236751	1.46415	0.247428	1.46388	0.36708	1.46383	0.226613	1.46392	0.166302
1.46459	0.242953	1.46469	0.196921	1.46446	0.237049	1.46464	0.248009	1.46437	0.367477	1.46434	0.226867	1.46442	0.166267
1.46508	0.243839	1.46518	0.19745	1.46494	0.237357	1.46514	0.248712	1.4649	0.367879	1.46483	0.227118	1.46494	0.166297
1.46556	0.244535	1.46567	0.197783	1.46543	0.237592	1.46567	0.249404	1.46542	0.368412	1.46534	0.227409	1.46543	0.166174
1.46604	0.245042	1.46616	0.197929	1.46594	0.237741	1.46617	0.249795	1.46591	0.368802	1.46584	0.227647	1.46592	0.16586
1.46655	0.24524	1.46665	0.198056	1.46643	0.237907	1.46664	0.250024	1.4664	0.369114	1.46635	0.227833	1.46642	0.165694
1.46707	0.245516	1.46716	0.198285	1.46695	0.238161	1.46715	0.250334	1.4669	0.369535	1.46684	0.228071	1.46692	0.165677
1.46758	0.245824	1.46766	0.198512	1.46748	0.238339	1.46766	0.250543	1.4674	0.370046	1.46735	0.228457	1.46745	0.165565
1.46808	0.246231	1.46817	0.198885	1.46796	0.238558	1.46815	0.250675	1.4679	0.370499	1.46785	0.228871	1.46796	0.165484
1.46858	0.246483	1.46864	0.199156	1.46845	0.238783	1.46864	0.250775	1.46841	0.371114	1.46833	0.229528	1.46846	0.165428
1.46907	0.246515	1.46916	0.199291	1.46896	0.238912	1.46915	0.251041	1.46891	0.371654	1.46883	0.230004	1.46895	0.165243
1.46957	0.246742	1.46966	0.199508	1.46948	0.239015	1.46964	0.25143	1.46939	0.372171	1.46933	0.230485	1.46944	0.165068
1.47007	0.247349	1.47016	0.200063	1.46999	0.239288	1.47012	0.251803	1.46989	0.372635	1.46984	0.230885	1.46992	0.164968
1.47057	0.247999	1.47065	0.200449	1.47048	0.239662	1.47064	0.252161	1.47038	0.373346	1.47036	0.231508	1.47044	0.164943
1.47108	0.248576	1.47117	0.200718	1.47097	0.24008	1.47118	0.252523	1.47088	0.374099	1.47089	0.2322	1.47096	0.164784
1.47159	0.248819	1.47168	0.20099	1.47149	0.240332	1.4717	0.252797	1.47139	0.374883	1.47136	0.232841	1.47147	0.164617
1.47209	0.249092	1.47219	0.201307	1.472	0.240627	1.47217	0.25314	1.47189	0.375584	1.47185	0.233516	1.47194	0.164562
1.47258	0.249567	1.47269	0.201629	1.47248	0.240891	1.47266	0.253423	1.47241	0.376512	1.47235	0.234381	1.4724	0.164522
1.47307	0.250099	1.47318	0.202048	1.47297	0.241261	1.47317	0.253782	1.47291	0.377439	1.47285	0.235106	1.47292	0.16443
1.47358	0.250305	1.47369	0.202332	1.47346	0.241559	1.47367	0.253844	1.4734	0.378483	1.47336	0.235666	1.47343	0.164372
1.47407	0.250421	1.4742	0.202564	1.47398	0.241903	1.47417	0.254117	1.47389	0.379456	1.47384	0.236203	1.47393	0.164295
1.47457	0.25087	1.47471	0.203044	1.4745	0.242258	1.47466	0.254714	1.47439	0.38059	1.47435	0.236875	1.47443	0.164215
1.47508	0.251574	1.47518	0.20381	1.47501	0.242518	1.47516	0.255489	1.47489	0.381693	1.47486	0.23734	1.47494	0.164221
1.47559	0.252183	1.47566	0.20434	1.4755	0.242857	1.47564	0.256033	1.47538	0.382653	1.47536	0.237794	1.47545	0.164129
1.47609	0.252891	1.47617	0.204786	1.47598	0.243256	1.47616	0.256601	1.47589	0.383652	1.47587	0.238389	1.47594	0.163995
1.47659	0.253402	1.47669	0.205142	1.47649	0.243703	1.47667	0.257304	1.47639	0.384683	1.47637	0.239064	1.47643	0.163917
1.47709	0.253832	1.47717	0.205497	1.47698	0.244079	1.47717	0.257934	1.47691	0.385507	1.47685	0.239603	1.47693	0.16383
1.47759	0.254512	1.47766	0.205867	1.47748	0.24441	1.47765	0.258106	1.47741	0.386119	1.47734	0.240098	1.47745	0.163713
1.47809	0.255101	1.47815	0.206283	1.47797	0.244681	1.47815	0.258351	1.4779	0.386714	1.47784	0.240497	1.47795	0.163664
1.47859	0.255195	1.47867	0.206677	1.47846	0.244997	1.47865	0.258593	1.47839	0.387334	1.47836	0.240933	1.47843	0.163618
1.47907	0.255127	1.47921	0.206834	1.47896	0.245233	1.47916	0.259019	1.47887	0.387923	1.47887	0.241408	1.47893	0.163607
1.47959	0.255602	1.47969	0.207358	1.47945	0.245373	1.47967	0.25972	1.47938	0.38854	1.47937	0.241846	1.47945	0.163602
1.4801	0.256619	1.48019	0.208406	1.47993	0.245789	1.48016	0.260509	1.4799	0.389412	1.47986	0.24227	1.47993	0.163607
1.48059	0.257618	1.48067	0.20912	1.48043	0.246458	1.48067	0.26136	1.48039	0.390448	1.48035	0.24289	1.4804	0.163591
1.48106	0.258349	1.48116	0.209345	1.48094	0.246975	1.48117	0.261935	1.48088	0.391518	1.48084	0.243455	1.48087	0.163504
1.48155	0.258713	1.48164	0.209576	1.48144	0.24718	1.48165	0.262283	1.48137	0.39284	1.48133	0.243912	1.48139	0.163376
1.48205	0.258891	1.48217	0.210034	1.48193	0.247309	1.48217	0.262786	1.48188	0.394266	1.48183	0.244437	1.48191	0.163337
1.48255	0.25925	1.48268	0.210397	1.48243	0.247515	1.4827	0.263248	1.48237	0.395814	1.48236	0.245036	1.48244	0.163308
1.48306	0.259613	1.48317	0.210845	1.48294	0.248013	1.4832	0.263481	1.48289	0.39731	1.48286	0.24587	1.48295	0.16327
1.48357	0.259685	1.48365	0.211199	1.48344	0.248268	1.48369	0.263222	1.48338	0.398481	1.48336	0.246661	1.48344	0.163184
1.48407	0.259835	1.48413	0.211362	1.48394	0.248709	1.48415	0.263611	1.48389	0.399717	1.48384	0.247311	1.48393	0.163101
1.48457	0.260465	1.48463	0.211539	1.48444	0.249261	1.48461	0.264309	1.4844	0.401163	1.48433	0.248377	1.48444	0.163044
1.48507	0.261139	1.48514	0.2122	1.48494	0.249692	1.48512	0.264958	1.48489	0.402536	1.48484	0.249369	1.48494	0.163027
1.48558	0.261571	1.48565	0.212945	1.48547	0.249973	1.48566	0.265343	1.48538	0.403837	1.48535	0.250221	1.48542	0.16294
1.48609	0.261848	1.48615	0.213315	1.48599	0.250071	1.48619	0.26558	1.48588	0.405467	1.48584	0.251051	1.48593	0.162848
1.48659	0.262014	1.48666	0.213558	1.48649	0.250246	1.48667	0.265859	1.48636	0.407385	1.48634	0.251988	1.48645	0.162721
1.48709	0.262223	1.48719	0.214034	1.48698	0.250527	1.48719	0.26619	1.48686	0.409625	1.48683	0.252361	1.48695	0.162695
1.4876	0.262505	1.48769	0.214515	1.48748	0.250833	1.48769	0.266536	1.48737	0.411975	1.48735	0.252477	1.48744	0.162633
1.48809	0.262747	1.48821	0.214872	1.48801	0.251158	1.48819	0.266673	1.4879	0.414243	1.48786	0.25303	1.48794	0.162614
1.48858	0.262957	1.4887	0.215071	1.48852	0.251518	1.48869	0.266758	1.48841	0.416022	1.48835	0.253954	1.48845	0.16256
1.48908	0.263018	1.48919	0.215216	1.48903	0.2517	1.48917	0.267012	1.48892	0.417312	1.48885	0.254738	1.48893	0.162551
1.48958	0.263258	1.48969	0.215602	1.48951	0.251726	1.48968	0.267349	1.4894	0.418176	1.48935	0.25534	1.48941	0.162483
1.49009	0.263612	1.4902	0.216554	1.48998	0.251806	1.49017	0.267729	1.48991	0.419026	1.48984	0.255797	1.48991	0.16235
1.49059	0.26412	1.49069	0.217172	1.49046	0.252015	1.49067	0.268086	1.4904	0.420088	1.49033	0.25622	1.49042	0.162243
1.49108	0.264624	1.49117	0.217394	1.49097	0.252271	1.49117	0.268398	1.49087	0.421565	1.49083	0.256699	1.49091	0.162118
1.49158	0.264732	1.49168	0.217728	1.49149	0.252418	1.49169	0.268564	1.49139	0.423209	1.49134	0.257025	1.49139	0.16196
1.49209	0.264852	1.4922	0.218472	1.49199	0.252564	1.49217	0.268867	1.49193	0.425029	1.49186	0.25728	1.4919	0.161858
1.49259	0.265131	1.49269	0.219216	1.49249	0.252829	1.49268	0.269184	1.49243	0.426926	1.49237	0.257554	1.49242	0.161918
1.49308	0.265396	1.49317	0.219637	1.49298	0.253017	1.4932	0.269281	1.49291	0.428892	1.49286	0.257809	1.49294	0.161879
1.49358	0.265542	1.49366	0.219912	1.4935	0.253064	1.49372	0.269145	1.49342	0.43071	1.49336	0.25796	1.49342	0.161745
1.49407	0.26576	1.49417	0.22023	1.494	0.25321	1.49421	0.269436	1.49392	0.432436	1.49385	0.258099	1.4939	0.161651
1.49458	0.266089	1.49467	0.220652	1.49448	0.253305	1.49469	0.270066	1.49442	0.434191	1.49435	0.258359	1.49441	0.161521
1.49508	0.266415	1.49519	0.221395	1.49499	0.253291	1.49519	0.27046	1.49491	0.435877	1.49484	0.258736	1.49493	0.161405
1.49558	0.266758	1.49568	0.222154	1.4955	0.253345	1.49569	0.270704	1.49538	0.437576	1.49534	0.259234	1.49544	0.161198
1.49609	0.2672	1.49618	0.223068	1.496	0.253519	1.4962	0.271179	1.49588	0.43998	1.49584	0.25971	1.49591	0.160999
1.49659	0.267404	1.49665	0.223866	1.49649	0.253726	1.49666	0.27176	1.4964	0.442981	1.49635	0.260214	1.49642	0.161025
1.49709	0.267739	1.49715	0.224527	1.49697	0.253933	1.49718	0.272255	1.49692	0.445685	1.49686	0.260718	1.49694	0.161141
1.49758	0.267898	1.49767	0.224431	1.49748	0.253953	1.49769	0.27249	1.49741	0.447803	1.49737	0.261293	1.49745	0.161173
1.49807	0.268044	1.49819	0.223682	1.498	0.253999	1.49819	0.272452	1.49791	0.449143	1.49788	0.261871	1.49794	0.160926
1.49859	0.268157	1.49869	0.223946	1.49849	0.25411	1.49869	0.272254	1.49838	0.450205	1.49837	0.262381	1.49844	0.160629
1.49911	0.268297	1.49918	0.224303	1.49897	0.254196	1.4992	0.272446	1.49887	0.451524	1.49885	0.262957	1.49892	0.160478
1.4996	0.268565	1.4997	0.224697	1.49944	0.254318	1.49968	0.272978	1.49937	0.453319	1.49935	0.26357	1.49942	0.160336
1.50009	0.269297	1.50021	0.225782	1.49996	0.254483	1.50017	0.273851	1.49988	0.455475	1.49985	0.264079	1.49992	0.160301
1.50059	0.269934	1.5007	0.226613	1.5005	0.25463	1.50069	0.274474	1.50039	0.458149	1.50035	0.264813	1.50041	0.16025
1.50108	0.270185	1.50118	0.227139	1.50099	0.25477	1.5012	0.274938	1.50089	0.460666	1.50085	0.265475	1.50091	0.160269
1.50159	0.270222	1.50166	0.227535	1.50147	0.254863	1.50169	0.275411	1.50138	0.462881	1.50135	0.266132	1.50142	0.16016
1.5021	0.270368	1.50216	0.227828	1.50196	0.255073	1.50218	0.275975	1.5019	0.464819	1.50184	0.266857	1.50191	0.159947
1.50261	0.270639	1.50266	0.22815	1.50246	0.25523	1.50266	0.276294	1.50239	0.466838	1.50234	0.267588	1.50241	0.159695
1.50311	0.271058	1.50316	0.228389	1.50296	0.255366	1.50314	0.276228	1.5029	0.469481	1.50286	0.268247	1.5029	0.15952
1.5036	0.27118	1.50368	0.22847	1.50348	0.255456	1.50364	0.275949	1.50342	0.472872	1.50336	0.26896	1.50341	0.159333
1.50409	0.271239	1.50418	0.228467	1.50399	0.255577	1.50415	0.276196	1.50389	0.476375	1.50386	0.269531	1.50391	0.159326
1.50458	0.271663	1.50466	0.228648	1.5045	0.255758	1.50466	0.277096	1.50439	0.479132	1.50435	0.270397	1.50443	0.15937
1.50507	0.272193	1.50517	0.229172	1.50497	0.255952	1.50519	0.278056	1.50489	0.480782	1.50485	0.271078	1.50492	0.159319
1.50558	0.272675	1.50569	0.229726	1.50546	0.256147	1.50572	0.278814	1.50539	0.482018	1.50537	0.271597	1.50541	0.159178
1.50609	0.273091	1.50619	0.229989	1.50597	0.25643	1.50622	0.279267	1.5059	0.483762	1.50587	0.272043	1.50591	0.158936
1.50659	0.273037	1.50668	0.23016	1.50649	0.256575	1.5067	0.279522	1.50638	0.486248	1.50636	0.272482	1.50642	0.158578
1.50708	0.273215	1.50717	0.230406	1.50699	0.256829	1.50719	0.279844	1.50689	0.489274	1.50688	0.272945	1.50694	0.158384
1.50758	0.273417	1.50767	0.230597	1.5075	0.256943	1.5077	0.280113	1.50739	0.492191	1.50736	0.273505	1.50745	0.158281
1.5081	0.273784	1.50816	0.23094	1.50799	0.257173	1.50818	0.280273	1.50787	0.494618	1.50786	0.274077	1.50794	0.158176
1.50859	0.274071	1.50865	0.231201	1.5085	0.257357	1.50867	0.280287	1.50836	0.496675	1.50837	0.274822	1.50842	0.158119
1.50908	0.274056	1.50916	0.231408	1.50901	0.257553	1.50916	0.280447	1.50889	0.49895	1.50886	0.275532	1.50889	0.158069
1.50958	0.274327	1.50969	0.231685	1.50947	0.257701	1.50966	0.280976	1.50941	0.502045	1.50934	0.27621	1.50941	0.157948
1.51009	0.274849	1.5102	0.23227	1.50995	0.257899	1.51016	0.281755	1.50991	0.505553	1.50984	0.276972	1.50991	0.157725
1.51059	0.275289	1.51069	0.232836	1.51045	0.258164	1.51064	0.282407	1.5104	0.508637	1.51036	0.277689	1.51042	0.157469
1.51108	0.27561	1.51116	0.233134	1.51096	0.258305	1.51114	0.282599	1.51088	0.510931	1.51087	0.278504	1.51095	0.157379
1.51157	0.27566	1.51166	0.233259	1.51146	0.258256	1.51164	0.282639	1.51138	0.512721	1.51138	0.279478	1.51145	0.157446
1.51206	0.275803	1.51216	0.233769	1.51196	0.258491	1.51218	0.283092	1.51187	0.514676	1.51187	0.280525	1.51192	0.157405
1.51255	0.276143	1.51267	0.234245	1.51245	0.258761	1.51269	0.283502	1.51236	0.517399	1.51234	0.281726	1.5124	0.157444
1.51305	0.276338	1.51319	0.234727	1.51296	0.259034	1.51321	0.283575	1.51289	0.520451	1.51283	0.282698	1.51291	0.157283
1.51355	0.276355	1.51366	0.235088	1.51346	0.259183	1.51369	0.283207	1.5134	0.523663	1.51332	0.283523	1.51341	0.15703
1.51406	0.276257	1.5141	0.235366	1.51394	0.259324	1.51418	0.283266	1.5139	0.5264	1.51382	0.284335	1.51394	0.156716
1.51457	0.276409	1.5146	0.235965	1.51443	0.259529	1.51468	0.283981	1.51437	0.528955	1.51433	0.284843	1.51445	0.156425
1.51506	0.276805	1.51515	0.236775	1.51495	0.259854	1.51518	0.28498	1.51485	0.53256	1.51484	0.28529	1.51494	0.156223
1.51556	0.277104	1.51567	0.23742	1.51545	0.260074	1.51569	0.285783	1.51536	0.536966	1.51535	0.285904	1.51545	0.156013
1.51606	0.277468	1.51617	0.238113	1.51593	0.260421	1.51618	0.286593	1.51586	0.540594	1.51585	0.286444	1.51593	0.155789
1.51657	0.277547	1.51665	0.238523	1.51643	0.260725	1.51669	0.287142	1.51636	0.542891	1.51633	0.287025	1.5164	0.15562
1.51707	0.277637	1.51713	0.238956	1.51693	0.260882	1.51717	0.287602	1.51688	0.544352	1.51682	0.287495	1.51691	0.155547
1.51757	0.277839	1.51762	0.239315	1.51744	0.261089	1.51767	0.288021	1.51739	0.546236	1.51733	0.287889	1.51743	0.155477
1.51806	0.278225	1.51815	0.239838	1.51796	0.261627	1.51817	0.287783	1.51788	0.549123	1.51783	0.288174	1.51792	0.155413
1.51857	0.278438	1.51867	0.240368	1.51846	0.262002	1.51866	0.287284	1.51837	0.55283	1.51834	0.288423	1.51843	0.155204
1.51908	0.278444	1.51918	0.240853	1.51898	0.262383	1.51917	0.287855	1.51888	0.556275	1.51884	0.28859	1.51895	0.154839
1.51958	0.278657	1.5197	0.241395	1.5195	0.262591	1.51971	0.28899	1.51937	0.559375	1.51934	0.288659	1.51945	0.154229
1.52009	0.279238	1.52018	0.242293	1.51999	0.262934	1.52022	0.290407	1.51985	0.562443	1.51983	0.288769	1.51992	0.153919
1.52059	0.279814	1.52066	0.242852	1.52047	0.263237	1.52068	0.291917	1.52036	0.566319	1.52033	0.288931	1.52041	0.15403
1.52107	0.280355	1.52117	0.243128	1.52097	0.263455	1.52119	0.29283	1.52088	0.570393	1.52086	0.289115	1.52092	0.154035
1.52155	0.280424	1.52169	0.243378	1.52149	0.263547	1.52171	0.293324	1.52138	0.573577	1.52136	0.289247	1.52143	0.1538
1.52206	0.280415	1.52218	0.243803	1.52199	0.263858	1.52217	0.293666	1.52189	0.576071	1.52185	0.289343	1.52192	0.15361
1.52259	0.280603	1.52269	0.244246	1.52246	0.264164	1.52267	0.293829	1.52239	0.578794	1.52234	0.289468	1.52242	0.153251
1.52309	0.280966	1.52321	0.244712	1.52295	0.26435	1.5232	0.293744	1.5229	0.5821	1.52285	0.289635	1.5229	0.153149
1.52358	0.281021	1.52368	0.245032	1.52349	0.264532	1.52373	0.293131	1.52341	0.585469	1.52337	0.289827	1.52342	0.152865
1.52407	0.280922	1.52414	0.245163	1.52401	0.264878	1.52422	0.293296	1.5239	0.58872	1.52386	0.290003	1.52392	0.152756
1.52456	0.281289	1.52465	0.245225	1.5245	0.265134	1.52472	0.294302	1.52439	0.592556	1.52436	0.290273	1.52441	0.152892
1.52507	0.281974	1.52515	0.245705	1.525	0.26534	1.52515	0.295399	1.5249	0.597202	1.52486	0.290536	1.52491	0.152792
1.52558	0.282538	1.52566	0.246335	1.52549	0.265544	1.52564	0.296097	1.5254	0.601657	1.52536	0.290699	1.52542	0.152511
1.52608	0.282901	1.52618	0.246818	1.52598	0.265835	1.52615	0.296498	1.52588	0.605053	1.52586	0.29099	1.52593	0.152285
1.52658	0.283028	1.52669	0.247249	1.52649	0.266099	1.52666	0.296814	1.5264	0.607954	1.52637	0.291309	1.52645	0.151958
1.52708	0.28298	1.52717	0.247663	1.52698	0.266294	1.52717	0.296999	1.52691	0.611818	1.52686	0.291822	1.52694	0.151935
1.52756	0.282924	1.52765	0.247951	1.52747	0.266425	1.52767	0.297122	1.5274	0.616328	1.52735	0.292448	1.52741	0.151922
1.52806	0.283151	1.52816	0.248648	1.52796	0.266719	1.52818	0.297081	1.5279	0.619802	1.52784	0.293006	1.52791	0.151945
1.52856	0.283226	1.52869	0.249172	1.52845	0.267019	1.52868	0.296807	1.52841	0.622113	1.52834	0.293468	1.52841	0.151932
1.52908	0.283177	1.52923	0.249368	1.52897	0.267235	1.52917	0.296832	1.5289	0.624983	1.52886	0.293899	1.52892	0.151844
1.52958	0.283243	1.52972	0.249439	1.52951	0.267404	1.52968	0.297261	1.5294	0.629407	1.52936	0.294308	1.52943	0.151552
1.53007	0.283836	1.53019	0.250449	1.53002	0.267736	1.53014	0.297713	1.5299	0.633764	1.52986	0.294632	1.52991	0.151316
1.53057	0.284626	1.53066	0.251569	1.53051	0.267963	1.53064	0.298059	1.53039	0.636563	1.53035	0.295014	1.5304	0.151082
1.53107	0.28529	1.53116	0.252146	1.531	0.26823	1.53116	0.298315	1.5309	0.63844	1.53085	0.295412	1.53092	0.150918
1.53158	0.285449	1.53167	0.252701	1.53149	0.268471	1.53164	0.298437	1.5314	0.640824	1.53135	0.295889	1.53143	0.150722
1.53208	0.285656	1.53221	0.253508	1.53199	0.268857	1.53214	0.29854	1.53191	0.644323	1.53184	0.296288	1.53194	0.150723
1.53259	0.286025	1.53273	0.254201	1.5325	0.269249	1.53267	0.298666	1.53241	0.648456	1.53234	0.296732	1.53244	0.150836
1.53311	0.286303	1.53324	0.255025	1.533	0.269579	1.53316	0.298706	1.5329	0.652768	1.53284	0.297297	1.53294	0.151009
1.53359	0.286201	1.53372	0.255691	1.53349	0.269858	1.53367	0.298538	1.53341	0.657974	1.53336	0.297852	1.53342	0.150826
1.53408	0.28586	1.53421	0.255985	1.53399	0.270171	1.53417	0.29852	1.53392	0.663404	1.53387	0.298198	1.53391	0.150622
1.53456	0.286117	1.53471	0.256217	1.53449	0.270525	1.53469	0.298721	1.5344	0.667043	1.53435	0.298626	1.53439	0.150365
1.53507	0.287041	1.53519	0.257047	1.53499	0.271079	1.53519	0.29916	1.53488	0.669068	1.53484	0.299084	1.5349	0.150168
1.5356	0.287902	1.53567	0.257776	1.53551	0.271653	1.53572	0.299644	1.53541	0.671267	1.53537	0.299492	1.53543	0.149984
1.53612	0.288516	1.5362	0.258244	1.536	0.272047	1.53621	0.299967	1.53595	0.674536	1.53589	0.299735	1.53594	0.149833
1.53661	0.2885	1.53673	0.2587	1.5365	0.272371	1.5367	0.300151	1.53645	0.678357	1.53638	0.300102	1.53644	0.149828
1.53712	0.288331	1.53721	0.259185	1.53701	0.272842	1.53721	0.300423	1.53694	0.682185	1.53689	0.300404	1.53692	0.149917
1.53763	0.288447	1.5377	0.259627	1.53751	0.27316	1.53772	0.300625	1.53744	0.686383	1.5374	0.300698	1.53742	0.149879
1.53812	0.288444	1.53821	0.26004	1.53802	0.273547	1.53821	0.300536	1.53794	0.691039	1.5379	0.301004	1.53793	0.149719
1.53863	0.288225	1.53873	0.260439	1.53852	0.274099	1.53872	0.300318	1.53842	0.695702	1.53839	0.301401	1.53846	0.149647
1.53913	0.287769	1.53924	0.260503	1.53902	0.2746	1.53921	0.30036	1.5389	0.699188	1.53888	0.301613	1.53896	0.149624
1.53962	0.288022	1.53974	0.260705	1.53953	0.275258	1.53972	0.300687	1.5394	0.70235	1.53938	0.301681	1.53944	0.149415
1.54012	0.288841	1.54023	0.261209	1.54003	0.275981	1.54023	0.301331	1.53992	0.705839	1.5399	0.301882	1.53996	0.149414
1.54062	0.289767	1.54072	0.261796	1.54052	0.276831	1.54074	0.301883	1.54044	0.709566	1.5404	0.302128	1.54047	0.149475
1.54111	0.290264	1.5412	0.262191	1.54101	0.27754	1.54121	0.302531	1.54095	0.713813	1.54089	0.302464	1.54097	0.14949
1.54161	0.290268	1.54171	0.26244	1.54151	0.277919	1.54168	0.303001	1.54146	0.719295	1.54139	0.302837	1.54147	0.149274
1.54212	0.290256	1.5422	0.262849	1.54201	0.278261	1.5422	0.303351	1.54196	0.725065	1.54189	0.303063	1.54195	0.149122
1.54262	0.29041	1.5427	0.263319	1.5425	0.278577	1.54271	0.303525	1.54245	0.729221	1.54238	0.303215	1.54246	0.149042
1.54311	0.29053	1.54321	0.263656	1.543	0.279007	1.5432	0.30334	1.54292	0.731767	1.54287	0.303362	1.54298	0.149163
1.54361	0.290387	1.54371	0.264115	1.54351	0.279519	1.54368	0.302867	1.54341	0.734376	1.54338	0.303474	1.54347	0.149194
1.54409	0.290119	1.54419	0.264386	1.54399	0.280239	1.54416	0.303054	1.5439	0.738171	1.54388	0.303666	1.54394	0.149184
1.54458	0.290387	1.5447	0.264544	1.54446	0.280822	1.54466	0.303736	1.5444	0.74246	1.54437	0.304006	1.54443	0.149078
1.54506	0.291051	1.54518	0.265323	1.54495	0.281287	1.54518	0.304657	1.5449	0.746264	1.54487	0.304235	1.54494	0.148936
1.54557	0.291578	1.54565	0.26633	1.54545	0.281639	1.54568	0.305458	1.54538	0.750304	1.54536	0.304485	1.54543	0.148782
1.54608	0.291845	1.54618	0.267159	1.54598	0.281881	1.54617	0.306006	1.54588	0.754903	1.54585	0.304624	1.54593	0.148716
1.54658	0.291955	1.54671	0.267675	1.54646	0.28227	1.54666	0.30656	1.54638	0.759501	1.54636	0.304817	1.54643	0.148597
1.54707	0.291924	1.5472	0.268215	1.54695	0.282648	1.54717	0.307036	1.54687	0.763045	1.54686	0.304923	1.54692	0.148394
1.54758	0.291964	1.54769	0.268654	1.54748	0.282932	1.54769	0.307174	1.54739	0.766433	1.54736	0.305048	1.54743	0.148255
1.54808	0.292229	1.5482	0.269321	1.548	0.283315	1.54822	0.307158	1.54792	0.769989	1.54787	0.305159	1.54792	0.14817
1.54859	0.292364	1.5487	0.27006	1.5485	0.283612	1.54872	0.30691	1.54844	0.773889	1.54837	0.30538	1.54842	0.148081
1.54909	0.292274	1.54918	0.270572	1.54897	0.283856	1.54918	0.307252	1.54894	0.778945	1.54887	0.305567	1.54893	0.148068
1.54959	0.292266	1.54968	0.271211	1.54946	0.284044	1.54965	0.308001	1.54943	0.785263	1.54938	0.305806	1.54943	0.148129
1.55008	0.292475	1.55017	0.272208	1.54998	0.284186	1.55014	0.30887	1.54992	0.790377	1.54987	0.305915	1.54995	0.148046
1.55058	0.292831	1.55067	0.273176	1.55049	0.284334	1.55063	0.309606	1.55042	0.793407	1.55035	0.30598	1.55044	0.147982
1.5511	0.293194	1.55121	0.273763	1.55099	0.284529	1.55114	0.310084	1.55094	0.796254	1.55085	0.305883	1.55092	0.147811
1.55161	0.29341	1.55172	0.274189	1.55151	0.284769	1.55166	0.310471	1.55147	0.800825	1.55136	0.305504	1.55139	0.147402
1.55209	0.293522	1.55222	0.275012	1.55201	0.285042	1.55216	0.31097	1.55197	0.805481	1.55188	0.305351	1.55188	0.147277
1.55259	0.293612	1.5527	0.275761	1.55249	0.285301	1.55268	0.311415	1.55243	0.809142	1.55237	0.305596	1.5524	0.147371
1.5531	0.293703	1.55317	0.276294	1.55298	0.285561	1.5532	0.311642	1.55293	0.81262	1.55285	0.305874	1.55293	0.14741
1.5536	0.293743	1.55372	0.276705	1.55347	0.285798	1.5537	0.311508	1.55343	0.817341	1.55335	0.306026	1.55344	0.147345
1.55411	0.293576	1.55423	0.276867	1.55399	0.286064	1.5542	0.311655	1.55391	0.821606	1.55385	0.30605	1.55395	0.147228
1.55461	0.29371	1.55471	0.277333	1.5545	0.286419	1.55468	0.312195	1.55441	0.824589	1.55436	0.306049	1.55445	0.147193
1.55511	0.29395	1.55519	0.278527	1.55501	0.286681	1.55514	0.312782	1.55493	0.827544	1.55488	0.306169	1.55495	0.147085
1.55561	0.29411	1.55569	0.279705	1.5555	0.286864	1.55568	0.313447	1.55546	0.831653	1.55539	0.306313	1.55545	0.147021
1.5561	0.294325	1.55619	0.280837	1.556	0.287239	1.5562	0.313939	1.55597	0.837451	1.55589	0.306362	1.55595	0.147046
1.5566	0.294441	1.5567	0.28205	1.55651	0.287683	1.55672	0.314326	1.55647	0.84512	1.55636	0.306661	1.55648	0.147066
1.5571	0.294515	1.55723	0.283137	1.55701	0.288193	1.55724	0.314632	1.55696	0.85182	1.55686	0.306798	1.55694	0.147055
1.55762	0.29461	1.55772	0.284051	1.5575	0.288769	1.55773	0.314884	1.55746	0.855248	1.55738	0.306801	1.55743	0.146968
1.55813	0.294652	1.55821	0.284603	1.55797	0.289344	1.55821	0.31494	1.55797	0.856643	1.55789	0.306792	1.55796	0.146956
1.55864	0.294669	1.55871	0.28526	1.55847	0.289915	1.55873	0.314808	1.55848	0.858586	1.55836	0.30684	1.55845	0.146992
1.55912	0.294559	1.55923	0.285313	1.55897	0.29035	1.5592	0.314883	1.55897	0.86226	1.55886	0.30694	1.55892	0.146971
1.5596	0.294639	1.55976	0.286689	1.55949	0.290831	1.55968	0.315277	1.55946	0.866686	1.55937	0.307155	1.55942	0.146987
1.5601	0.294911	1.56026	0.288578	1.56	0.291465	1.56019	0.315916	1.55994	0.871009	1.55986	0.307279	1.55989	0.14705
1.5606	0.295333	1.56074	0.289928	1.56049	0.292098	1.56071	0.316645	1.56046	0.876275	1.56036	0.307703	1.56039	0.14713
1.5611	0.295715	1.56123	0.290576	1.561	0.292715	1.56121	0.317377	1.56096	0.882348	1.56088	0.307896	1.56091	0.147102
1.5616	0.295739	1.56171	0.290916	1.56149	0.293401	1.56169	0.317998	1.56144	0.887001	1.56139	0.307934	1.56144	0.146944
1.56209	0.295762	1.56217	0.29118	1.56199	0.294134	1.56219	0.318717	1.5619	0.890882	1.56188	0.307997	1.56195	0.146859
1.56259	0.29601	1.56265	0.291453	1.56247	0.294886	1.56267	0.319265	1.5624	0.895122	1.56237	0.308073	1.56244	0.14689
1.56309	0.296271	1.56316	0.291782	1.56297	0.295624	1.56317	0.319239	1.56292	0.899453	1.56285	0.308186	1.56292	0.146989
1.5636	0.296288	1.56368	0.292087	1.56349	0.296111	1.5637	0.318882	1.56341	0.903764	1.56336	0.308161	1.56343	0.146826
1.5641	0.296172	1.56415	0.292188	1.56401	0.296718	1.56419	0.319102	1.56392	0.908951	1.5639	0.308114	1.56393	0.146704
1.5646	0.296366	1.56468	0.292421	1.56451	0.297402	1.56469	0.320162	1.56443	0.914276	1.5644	0.308272	1.56442	0.146612
1.5651	0.29708	1.5652	0.292952	1.56502	0.297916	1.56521	0.321177	1.56493	0.918406	1.56488	0.308412	1.56493	0.14662
1.5656	0.297903	1.56568	0.293632	1.56553	0.2985	1.56569	0.322236	1.56541	0.922112	1.56538	0.308418	1.56546	0.146583
1.56608	0.298477	1.56622	0.294252	1.56601	0.298962	1.56617	0.323295	1.56591	0.926249	1.56588	0.308467	1.56596	0.14661
1.56659	0.298637	1.56672	0.294861	1.56649	0.299345	1.56671	0.323968	1.56639	0.930604	1.56638	0.308709	1.56648	0.146484
1.56709	0.298776	1.5672	0.295599	1.56699	0.299816	1.56719	0.324305	1.5669	0.93527	1.56689	0.309034	1.56698	0.146568
1.56759	0.29894	1.56769	0.296294	1.5675	0.30032	1.56766	0.324566	1.5674	0.939745	1.56739	0.309388	1.56746	0.146603
1.56809	0.299474	1.56819	0.297151	1.56799	0.300926	1.56816	0.324858	1.56791	0.944609	1.56787	0.309641	1.56792	0.146637
1.5686	0.299841	1.5687	0.298088	1.5685	0.301602	1.56872	0.325182	1.56844	0.949638	1.56836	0.309958	1.56843	0.146854
1.5691	0.299733	1.5692	0.298643	1.56902	0.302045	1.56922	0.325697	1.56894	0.954341	1.56887	0.310343	1.56897	0.146954
1.5696	0.299936	1.56971	0.299283	1.56951	0.302522	1.56973	0.326331	1.56942	0.958662	1.56936	0.310351	1.56948	0.146925
1.57011	0.300557	1.57019	0.300544	1.57001	0.303083	1.57021	0.326942	1.56992	0.96329	1.56986	0.310094	1.56997	0.146874
1.5706	0.301388	1.5707	0.301596	1.5705	0.303801	1.5707	0.327428	1.5704	0.968454	1.57036	0.309973	1.57045	0.146682
1.57111	0.302139	1.5712	0.302377	1.57099	0.304657	1.57117	0.327914	1.57092	0.974027	1.57087	0.31009	1.57092	0.14654
1.57161	0.302563	1.57172	0.303139	1.57149	0.305566	1.57167	0.328343	1.57142	0.979092	1.57138	0.310311	1.57141	0.146414
1.57211	0.302986	1.5722	0.304082	1.57201	0.306495	1.57219	0.328804	1.57191	0.983228	1.57188	0.310369	1.57192	0.146505
1.57262	0.303355	1.57268	0.305036	1.57251	0.307438	1.5727	0.329134	1.57241	0.987308	1.57238	0.310776	1.57245	0.146641
1.57311	0.303815	1.5732	0.305755	1.57299	0.308317	1.57321	0.329289	1.57291	0.991912	1.57288	0.311038	1.57294	0.146697
1.57361	0.303877	1.57371	0.306582	1.57349	0.309195	1.57371	0.329268	1.57342	0.99676	1.57339	0.311145	1.57344	0.146591
1.57413	0.303857	1.57421	0.3069	1.574	0.310087	1.57418	0.329357	1.57393	1.00211	1.57389	0.3111	1.57394	0.146575
1.57461	0.304173	1.57471	0.307227	1.57453	0.310994	1.57467	0.329681	1.57443	1.00763	1.57437	0.311085	1.57444	0.146566
1.57512	0.304807	1.57521	0.307999	1.57503	0.311844	1.57519	0.330103	1.57492	1.01221	1.57486	0.311242	1.57495	0.14656
1.57563	0.305703	1.57574	0.30889	1.57551	0.31258	1.57571	0.330525	1.57541	1.01605	1.57535	0.311541	1.57545	0.146585
1.57611	0.306661	1.57625	0.309703	1.57597	0.313422	1.57621	0.331066	1.5759	1.02032	1.57584	0.311735	1.57596	0.146578
1.57659	0.307075	1.57675	0.310468	1.57647	0.314204	1.57671	0.331524	1.57642	1.02498	1.57635	0.311877	1.57644	0.146654
1.57708	0.307343	1.57722	0.311306	1.57697	0.314669	1.57721	0.331993	1.57691	1.02931	1.57685	0.312072	1.57694	0.146723
1.57758	0.307738	1.57766	0.312241	1.57747	0.315068	1.57767	0.332272	1.5774	1.0344	1.57736	0.312047	1.57743	0.146577
1.57809	0.308202	1.57819	0.313359	1.57796	0.315569	1.57817	0.332456	1.5779	1.03991	1.57786	0.312109	1.57793	0.146484
1.57859	0.308309	1.5787	0.31473	1.57846	0.316081	1.57869	0.332496	1.5784	1.04422	1.57836	0.312285	1.57843	0.146421
1.57909	0.308194	1.57919	0.315071	1.57896	0.316513	1.5792	0.332962	1.57891	1.04868	1.57887	0.312493	1.57894	0.146447
1.57958	0.308538	1.57968	0.3157	1.57947	0.317003	1.57969	0.333532	1.57941	1.05331	1.57937	0.312709	1.57945	0.146454
1.58007	0.309272	1.58018	0.317635	1.57996	0.317564	1.58018	0.334354	1.5799	1.05763	1.57986	0.312825	1.57996	0.146459
1.58057	0.310092	1.58068	0.319355	1.58046	0.318117	1.58071	0.335338	1.58042	1.06214	1.58035	0.312985	1.58045	0.146394
1.58107	0.310836	1.58118	0.320281	1.58097	0.318861	1.5812	0.33613	1.58095	1.0672	1.58087	0.313399	1.58095	0.146377
1.58157	0.311286	1.5817	0.321016	1.58148	0.319688	1.5817	0.336884	1.58146	1.07184	1.58134	0.313622	1.58144	0.146313
1.58207	0.311684	1.58219	0.321778	1.58197	0.320517	1.58219	0.337764	1.58194	1.07541	1.58184	0.313569	1.58192	0.146369
1.58257	0.312253	1.58266	0.322402	1.58247	0.321365	1.58269	0.338303	1.58242	1.0792	1.58234	0.313775	1.58241	0.146457
1.58309	0.313144	1.58316	0.323091	1.58298	0.32249	1.58316	0.338774	1.58293	1.08367	1.58286	0.313422	1.58292	0.146363
1.5836	0.313599	1.58368	0.323678	1.58348	0.323733	1.58366	0.338997	1.58344	1.0884	1.58338	0.312838	1.58342	0.146195
1.58412	0.31379	1.58419	0.324087	1.58397	0.324823	1.58417	0.339498	1.58393	1.09336	1.58389	0.312777	1.58391	0.146167
1.58463	0.314643	1.5847	0.324527	1.58448	0.325863	1.58467	0.340301	1.58442	1.099	1.58437	0.313224	1.58441	0.146362
1.58511	0.316182	1.58521	0.325636	1.58498	0.326831	1.58519	0.341298	1.58494	1.10392	1.58486	0.313594	1.58493	0.146364
1.5856	0.317664	1.58571	0.326777	1.58548	0.327804	1.5857	0.342361	1.58543	1.10779	1.58536	0.313985	1.58546	0.146344
1.58611	0.31876	1.5862	0.327607	1.58597	0.328708	1.58619	0.343147	1.58594	1.11178	1.58587	0.314059	1.58597	0.146295
1.58661	0.319301	1.58668	0.328316	1.58646	0.329415	1.58666	0.343747	1.58644	1.11661	1.58636	0.314418	1.58645	0.146213
1.5871	0.319779	1.58717	0.329339	1.58698	0.330134	1.58718	0.344188	1.58693	1.12116	1.58685	0.314688	1.58692	0.146206
1.58759	0.320348	1.5877	0.330188	1.58749	0.330828	1.58767	0.344436	1.5874	1.1261	1.58736	0.315023	1.58741	0.146197
1.58808	0.321271	1.58822	0.331224	1.58801	0.331643	1.58819	0.344723	1.58791	1.13089	1.58787	0.315337	1.5879	0.14621
1.58858	0.322009	1.58867	0.33231	1.58851	0.332641	1.58869	0.344822	1.58842	1.13526	1.58838	0.315897	1.58845	0.146214
1.58909	0.32221	1.58917	0.332643	1.58899	0.333687	1.58919	0.345141	1.58893	1.13897	1.58887	0.316136	1.58895	0.146301
1.5896	0.322528	1.5897	0.333188	1.5895	0.334593	1.58967	0.345979	1.58943	1.14286	1.58936	0.316376	1.58944	0.146329
1.5901	0.323403	1.59018	0.334858	1.59001	0.3358	1.59018	0.347097	1.58991	1.14762	1.58987	0.316534	1.58992	0.146347
1.5906	0.324335	1.59067	0.336136	1.59051	0.337341	1.59071	0.348139	1.59041	1.1525	1.59037	0.316691	1.59041	0.146402
1.59109	0.325076	1.59118	0.336906	1.59099	0.338893	1.59119	0.349057	1.59091	1.15818	1.59087	0.316876	1.59094	0.146328
1.59161	0.325368	1.59169	0.337514	1.59147	0.340307	1.59165	0.349948	1.59141	1.16411	1.59138	0.317278	1.59146	0.146258
1.5921	0.325769	1.59218	0.338337	1.59197	0.341726	1.59214	0.350746	1.5919	1.16903	1.59187	0.317603	1.59197	0.146352
1.59258	0.326243	1.59268	0.339275	1.59247	0.343134	1.59266	0.351511	1.59238	1.17374	1.59237	0.31805	1.59245	0.146485
1.59308	0.326753	1.59319	0.340397	1.59298	0.344397	1.5932	0.352159	1.59289	1.17862	1.59287	0.318425	1.59294	0.146468
1.59358	0.326999	1.59366	0.341437	1.5935	0.345401	1.59372	0.352649	1.5934	1.18361	1.59337	0.318702	1.59343	0.146416
1.59407	0.327188	1.59417	0.341786	1.59401	0.346025	1.59419	0.353536	1.59389	1.18913	1.59387	0.318873	1.59392	0.14644
1.59457	0.327861	1.59469	0.342672	1.59451	0.346579	1.59467	0.354571	1.5944	1.19485	1.59437	0.319029	1.59445	0.146487
1.59508	0.329047	1.59521	0.344754	1.59499	0.347074	1.59518	0.35603	1.59493	1.19982	1.59488	0.319219	1.59495	0.14654
1.5956	0.330402	1.59571	0.346495	1.59549	0.347515	1.59569	0.357352	1.59543	1.20477	1.59539	0.319407	1.59543	0.146517
1.59611	0.331639	1.59617	0.348018	1.596	0.347966	1.59618	0.358383	1.59593	1.20996	1.59588	0.319532	1.59593	0.146464
1.59661	0.332276	1.59666	0.349351	1.5965	0.348446	1.59667	0.359135	1.59642	1.21472	1.59636	0.319762	1.59643	0.146494
1.5971	0.332829	1.59718	0.350704	1.59701	0.349129	1.59718	0.35968	1.59692	1.21936	1.59686	0.319902	1.59692	0.146615
1.5976	0.333569	1.59767	0.351743	1.5975	0.34995	1.59768	0.359983	1.59742	1.22473	1.59739	0.320015	1.59741	0.146708
1.5981	0.334657	1.59815	0.352504	1.598	0.351024	1.59819	0.360224	1.59792	1.2294	1.59789	0.320118	1.5979	0.146783
1.5986	0.335401	1.59866	0.353227	1.59851	0.352029	1.59868	0.360389	1.59842	1.23354	1.59839	0.320255	1.59844	0.146881
1.59908	0.335813	1.59917	0.3535	1.59901	0.353024	1.59915	0.360725	1.59891	1.23862	1.59888	0.320388	1.59895	0.146894
1.59957	0.336606	1.59968	0.353911	1.59949	0.354199	1.59966	0.361155	1.59941	1.24364	1.59936	0.320504	1.59946	0.146876
1.60009	0.337912	1.60018	0.354645	1.59998	0.355591	1.60019	0.361646	1.59988	1.24776	1.59986	0.320633	1.59996	0.146919
1.6006	0.339316	1.6007	0.355339	1.6005	0.356983	1.60068	0.362233	1.6004	1.25278	1.60036	0.320839	1.60047	0.146995
1.60111	0.34037	1.6012	0.355853	1.60098	0.358307	1.60119	0.362749	1.60093	1.25824	1.60088	0.321077	1.60097	0.147078
1.6016	0.340999	1.60171	0.356359	1.60148	0.359501	1.60171	0.363326	1.60145	1.26292	1.60139	0.321334	1.60148	0.147095
1.60209	0.341521	1.60223	0.35703	1.602	0.360616	1.60218	0.363996	1.60193	1.26697	1.60189	0.321533	1.60199	0.147055
1.6026	0.342296	1.6027	0.357825	1.60252	0.361544	1.60269	0.364701	1.6024	1.27132	1.60239	0.321821	1.60249	0.146992
1.60311	0.343396	1.60319	0.358852	1.60302	0.362415	1.60322	0.365345	1.6029	1.27607	1.60289	0.322117	1.60298	0.146943
1.60361	0.344343	1.6037	0.359887	1.6035	0.363254	1.60373	0.365729	1.60342	1.28162	1.6034	0.32248	1.60348	0.146918
1.60411	0.345171	1.60418	0.360522	1.60398	0.364214	1.60422	0.366627	1.60391	1.28778	1.60388	0.322848	1.60397	0.146885
1.6046	0.346385	1.60469	0.361234	1.6045	0.365364	1.6047	0.367687	1.60441	1.29272	1.60436	0.323388	1.60445	0.146942
1.60509	0.348374	1.6052	0.362728	1.60501	0.366736	1.60517	0.368767	1.60491	1.29734	1.60487	0.323875	1.60493	0.146946
1.60559	0.350684	1.6057	0.364318	1.60553	0.368253	1.60567	0.369848	1.60542	1.30261	1.60539	0.324355	1.60544	0.146846
1.60609	0.35238	1.60621	0.365477	1.60603	0.369652	1.60617	0.370936	1.60593	1.30722	1.60589	0.324812	1.60594	0.146768
1.60659	0.3534	1.60673	0.366408	1.6065	0.37112	1.6067	0.371889	1.60643	1.31122	1.60638	0.325556	1.60645	0.146705
1.60708	0.354164	1.60723	0.367446	1.607	0.372574	1.6072	0.372633	1.60695	1.3159	1.60686	0.326344	1.60697	0.146717
1.60758	0.354804	1.60772	0.368217	1.60749	0.374036	1.6077	0.373198	1.60742	1.32093	1.60736	0.327281	1.60745	0.146793
1.6081	0.355501	1.60821	0.369188	1.60797	0.375474	1.6082	0.37388	1.60791	1.32501	1.60787	0.328008	1.60795	0.146868
1.6086	0.356004	1.60869	0.370082	1.60846	0.376611	1.60868	0.374475	1.60843	1.32905	1.60839	0.328712	1.60847	0.146925
1.60909	0.356283	1.60919	0.370325	1.60897	0.377488	1.60916	0.375107	1.60893	1.33371	1.60888	0.329435	1.60898	0.147005
1.60958	0.356616	1.60971	0.370675	1.60948	0.378283	1.60966	0.375894	1.60941	1.33821	1.60937	0.330169	1.60946	0.147015
1.61008	0.357183	1.61019	0.372029	1.60996	0.379097	1.61017	0.376742	1.60992	1.34353	1.60986	0.33094	1.60995	0.147054
1.61058	0.358179	1.61067	0.373607	1.61045	0.380008	1.61066	0.377562	1.61041	1.35007	1.61036	0.331699	1.61045	0.147054
1.61108	0.359293	1.61116	0.374918	1.61097	0.381107	1.61117	0.378647	1.61091	1.35521	1.61086	0.332506	1.61093	0.147125
1.61157	0.360022	1.61169	0.376386	1.61147	0.38226	1.61167	0.379585	1.61142	1.35869	1.61136	0.333177	1.61142	0.147072
1.61207	0.360845	1.61221	0.378219	1.61198	0.383646	1.61218	0.380671	1.61194	1.36232	1.61186	0.333773	1.61192	0.147146
1.61258	0.361862	1.61269	0.379972	1.6125	0.385155	1.61269	0.381874	1.61242	1.36706	1.61236	0.33448	1.61242	0.147258
1.6131	0.363221	1.6132	0.381179	1.613	0.386775	1.61317	0.382665	1.61291	1.37258	1.61287	0.335137	1.61292	0.147361
1.6136	0.364314	1.61368	0.382195	1.61348	0.388428	1.61367	0.383266	1.61343	1.37768	1.61337	0.335738	1.61342	0.147391
1.61408	0.365044	1.61414	0.38247	1.61397	0.390007	1.6142	0.38421	1.61392	1.38267	1.61387	0.336426	1.61392	0.147478
1.6146	0.366233	1.61465	0.383133	1.61448	0.391363	1.61471	0.385684	1.61441	1.38652	1.61434	0.337272	1.61441	0.147478
1.6151	0.367892	1.61519	0.384613	1.615	0.392603	1.61517	0.387402	1.61493	1.39057	1.61483	0.337976	1.61491	0.147348
1.6156	0.369631	1.61572	0.385907	1.61549	0.393688	1.61565	0.388763	1.61544	1.39568	1.61535	0.338411	1.61546	0.147124
1.6161	0.371158	1.61617	0.386717	1.61597	0.394839	1.61618	0.389992	1.61592	1.40048	1.61586	0.339231	1.61598	0.147169
1.6166	0.372206	1.61666	0.387426	1.61649	0.396231	1.61668	0.391001	1.61642	1.40507	1.6164	0.340588	1.61647	0.147264
1.6171	0.373063	1.61715	0.388295	1.61701	0.398158	1.61719	0.391777	1.61695	1.41088	1.61693	0.342198	1.61695	0.147343
1.6176	0.374032	1.61763	0.389298	1.61751	0.400251	1.61772	0.39235	1.61745	1.41641	1.61742	0.343713	1.61741	0.147329
1.61811	0.375378	1.61816	0.390284	1.618	0.402453	1.61822	0.392789	1.61793	1.42144	1.61789	0.344975	1.61789	0.147449
1.61861	0.376567	1.6187	0.391356	1.61849	0.404394	1.61873	0.393155	1.61843	1.42682	1.61838	0.346161	1.61841	0.147549
1.6191	0.377451	1.61921	0.392064	1.61901	0.406301	1.61921	0.393853	1.61891	1.43268	1.61887	0.347518	1.61892	0.147568
1.6196	0.378852	1.61972	0.393004	1.61949	0.407765	1.61971	0.39475	1.61938	1.43803	1.61938	0.348664	1.61945	0.147528
1.6201	0.381108	1.62021	0.394958	1.61998	0.408909	1.62022	0.39606	1.61989	1.4436	1.61988	0.349499	1.61997	0.14761
1.6206	0.383498	1.62068	0.396819	1.62049	0.409746	1.62073	0.397282	1.6204	1.44853	1.62037	0.350334	1.62048	0.147668
1.6211	0.385261	1.62119	0.398008	1.62099	0.410349	1.62121	0.398534	1.62092	1.45309	1.62087	0.350956	1.62095	0.147652
1.62161	0.386188	1.62168	0.399031	1.6215	0.411132	1.62172	0.399841	1.62144	1.45796	1.62137	0.351334	1.62144	0.147683
1.62211	0.386883	1.6222	0.400324	1.62199	0.41232	1.62223	0.401082	1.62195	1.46256	1.62185	0.351656	1.62195	0.147845
1.62259	0.3877	1.62269	0.401517	1.6225	0.413736	1.62273	0.402065	1.62245	1.4671	1.62236	0.352024	1.62243	0.147905
1.62307	0.388586	1.62319	0.402525	1.623	0.415228	1.62316	0.402809	1.62294	1.47255	1.62289	0.352596	1.62292	0.147951
1.62357	0.389272	1.62369	0.403548	1.62351	0.416743	1.62365	0.403406	1.62342	1.47809	1.6234	0.353451	1.62342	0.148094
1.62408	0.389836	1.6242	0.404154	1.62399	0.418361	1.62415	0.404321	1.6239	1.48293	1.6239	0.354372	1.62391	0.148333
1.62458	0.390879	1.6247	0.404614	1.62447	0.420144	1.62467	0.405546	1.62438	1.48768	1.62438	0.355259	1.62445	0.148462
1.62508	0.392828	1.62521	0.406626	1.62499	0.421962	1.62519	0.406772	1.62489	1.4922	1.62488	0.356292	1.62496	0.148496
1.62559	0.395199	1.6257	0.409865	1.6255	0.423467	1.62568	0.407893	1.62539	1.49632	1.62538	0.357588	1.62546	0.148601
1.62609	0.397319	1.62618	0.411935	1.62599	0.424682	1.62617	0.409036	1.62589	1.50063	1.62587	0.358925	1.62594	0.14868
1.62658	0.39867	1.62666	0.413396	1.62648	0.425721	1.62669	0.410068	1.6264	1.50529	1.62637	0.360148	1.62645	0.148625
1.62708	0.399948	1.62715	0.414708	1.627	0.426944	1.62721	0.411568	1.62691	1.51	1.62688	0.361301	1.62695	0.148609
1.6276	0.401218	1.62769	0.415711	1.62751	0.428249	1.62771	0.412902	1.62744	1.51379	1.62738	0.36272	1.62746	0.148611
1.6281	0.402606	1.62821	0.4165	1.62801	0.429925	1.62822	0.414269	1.62795	1.51796	1.62786	0.364015	1.62795	0.148654
1.62859	0.403718	1.62874	0.417192	1.6285	0.431889	1.62871	0.415724	1.62844	1.52262	1.62836	0.365251	1.62846	0.148655
1.6291	0.40446	1.62924	0.417588	1.62898	0.434049	1.62918	0.417343	1.62894	1.52683	1.62887	0.366299	1.62897	0.148709
1.62961	0.405747	1.62971	0.417811	1.6295	0.436066	1.62968	0.419181	1.62946	1.53108	1.62937	0.367355	1.62947	0.148594
1.6301	0.408103	1.63018	0.419076	1.63002	0.437879	1.63017	0.420724	1.62994	1.5362	1.62987	0.368513	1.62996	0.148637
1.6306	0.411088	1.63067	0.420755	1.63054	0.439237	1.63066	0.421802	1.63042	1.5412	1.63036	0.370185	1.63047	0.148905
1.6311	0.413908	1.6312	0.422075	1.63102	0.440223	1.63118	0.422555	1.63092	1.54562	1.63086	0.372079	1.63095	0.14902
1.6316	0.415607	1.63167	0.423305	1.63149	0.441117	1.63167	0.423237	1.63141	1.55163	1.63137	0.374151	1.63144	0.148967
1.63211	0.417039	1.63218	0.424962	1.63199	0.442266	1.63216	0.424009	1.63192	1.55774	1.63185	0.376235	1.63194	0.149086
1.6326	0.418289	1.63269	0.426559	1.63249	0.443676	1.63269	0.424887	1.63242	1.56344	1.63236	0.378506	1.63242	0.149427
1.6331	0.419311	1.63317	0.428182	1.63298	0.445455	1.63322	0.425778	1.63291	1.56933	1.63286	0.380392	1.63291	0.149615
1.63361	0.420134	1.63369	0.429522	1.63348	0.447059	1.63373	0.426479	1.6334	1.57447	1.63336	0.381594	1.63342	0.149852
1.63411	0.42078	1.63421	0.430135	1.634	0.448826	1.63421	0.427436	1.6339	1.57982	1.63387	0.38228	1.63396	0.149885
1.6346	0.421936	1.63472	0.430617	1.6345	0.450626	1.63467	0.428875	1.6344	1.5852	1.63438	0.382758	1.63446	0.149786
1.6351	0.423946	1.63522	0.431994	1.635	0.452357	1.63516	0.43079	1.6349	1.58969	1.6349	0.383267	1.63496	0.149725
1.63561	0.426422	1.6357	0.433641	1.6355	0.453954	1.63567	0.432517	1.63543	1.59544	1.6354	0.383938	1.63547	0.149742
1.63612	0.428856	1.63619	0.434993	1.63599	0.455513	1.63619	0.434092	1.63592	1.60181	1.63588	0.384903	1.63595	0.149792
1.63662	0.430312	1.63671	0.436173	1.63649	0.456965	1.63668	0.435502	1.63641	1.60625	1.63638	0.386262	1.63645	0.149988
1.63711	0.431522	1.6372	0.437475	1.63699	0.45849	1.63718	0.436719	1.63692	1.61101	1.63688	0.387717	1.63695	0.150161
1.63761	0.433012	1.63769	0.438856	1.63751	0.46022	1.63767	0.437724	1.63742	1.61638	1.63736	0.389319	1.63745	0.150309
1.63811	0.434538	1.6382	0.440484	1.63801	0.462333	1.63817	0.438604	1.63792	1.62166	1.63787	0.391135	1.63796	0.150583
1.63861	0.435885	1.63868	0.442413	1.63852	0.464769	1.63867	0.439318	1.63843	1.62748	1.63837	0.393021	1.63846	0.150783
1.63911	0.436598	1.63915	0.443507	1.63901	0.467383	1.63917	0.439938	1.63893	1.63356	1.63888	0.394718	1.63896	0.150828
1.63962	0.437889	1.63965	0.444322	1.63949	0.46948	1.63968	0.440947	1.6394	1.63894	1.63939	0.396239	1.63947	0.150964
1.64012	0.440225	1.64017	0.445934	1.64	0.471018	1.64015	0.442555	1.6399	1.64474	1.63987	0.397717	1.63997	0.151254
1.64062	0.443296	1.64067	0.447563	1.64048	0.471994	1.64061	0.444315	1.64041	1.65041	1.64035	0.399316	1.64044	0.151311
1.64111	0.445702	1.64116	0.448469	1.64098	0.472715	1.64115	0.446071	1.64091	1.65623	1.64085	0.40098	1.6409	0.151405
1.64161	0.447065	1.64164	0.449038	1.64148	0.473539	1.64167	0.44776	1.64138	1.66231	1.64137	0.402984	1.64141	0.151321
1.6421	0.448134	1.64217	0.450016	1.64198	0.47484	1.64218	0.449447	1.64189	1.66716	1.64189	0.405354	1.64191	0.151487
1.64257	0.449336	1.64264	0.451333	1.64249	0.476542	1.64269	0.451059	1.6424	1.67129	1.64239	0.407784	1.64242	0.151624
1.64307	0.450577	1.64316	0.452822	1.64299	0.478615	1.6432	0.452304	1.6429	1.67698	1.64287	0.409995	1.64297	0.151831
1.64358	0.451735	1.64369	0.454528	1.64348	0.48074	1.6437	0.453003	1.64342	1.68298	1.64336	0.411761	1.64349	0.151966
1.64409	0.452601	1.64417	0.455949	1.64398	0.482889	1.64418	0.453708	1.64391	1.68934	1.64384	0.413094	1.64398	0.151918
1.64458	0.453958	1.64463	0.456871	1.64448	0.484779	1.64467	0.454705	1.6444	1.69533	1.64435	0.414117	1.64447	0.151973
1.64507	0.456347	1.64512	0.458337	1.645	0.486403	1.64516	0.455908	1.64487	1.70026	1.64486	0.415071	1.64494	0.152232
1.64558	0.459395	1.64564	0.460589	1.64551	0.487713	1.64568	0.45712	1.64539	1.70543	1.64536	0.416252	1.64542	0.152228
1.64607	0.462099	1.64615	0.462275	1.646	0.488911	1.6462	0.458667	1.64591	1.71131	1.64586	0.417702	1.64593	0.152179
1.64657	0.463637	1.64666	0.463383	1.6465	0.490275	1.64671	0.460307	1.64643	1.71717	1.64636	0.419627	1.64644	0.152367
1.64708	0.464862	1.64721	0.464703	1.64702	0.492183	1.64723	0.462198	1.64692	1.72485	1.64685	0.421379	1.64693	0.152461
1.64758	0.466357	1.64771	0.466032	1.64751	0.494401	1.6477	0.463964	1.6474	1.73127	1.64735	0.423102	1.64745	0.152246
1.6481	0.468342	1.6482	0.467872	1.64797	0.496877	1.64816	0.46538	1.64789	1.736	1.64786	0.425112	1.64796	0.152161
1.64861	0.470408	1.64871	0.470094	1.6485	0.499408	1.64867	0.46654	1.6484	1.74123	1.64836	0.427089	1.64844	0.152492
1.6491	0.471872	1.64922	0.471521	1.64903	0.501414	1.64917	0.467796	1.64891	1.74647	1.64887	0.428784	1.64895	0.152854
1.64961	0.474076	1.64972	0.472533	1.64952	0.502836	1.64967	0.469239	1.64942	1.7521	1.64937	0.430306	1.64945	0.152919
1.6501	0.476997	1.6502	0.474602	1.64999	0.503969	1.65019	0.470746	1.6499	1.75777	1.64988	0.431861	1.64992	0.153059
1.65059	0.479798	1.65068	0.477226	1.65048	0.505257	1.6507	0.472195	1.65038	1.7627	1.65037	0.433969	1.65042	0.153151
1.65108	0.481648	1.65115	0.478727	1.651	0.506746	1.65119	0.473919	1.65091	1.76744	1.65086	0.43673	1.65091	0.153171
1.65159	0.48254	1.65163	0.47943	1.6515	0.508571	1.65169	0.475925	1.65143	1.77269	1.65137	0.439578	1.65142	0.153023
1.65209	0.483538	1.65216	0.480191	1.65199	0.51073	1.65218	0.478272	1.65194	1.77984	1.65188	0.442088	1.65194	0.153293
1.65259	0.485201	1.65264	0.481131	1.6525	0.512938	1.65268	0.480547	1.65243	1.788	1.6524	0.443942	1.6524	0.153861
1.65311	0.487225	1.65314	0.482338	1.65301	0.514939	1.65319	0.482327	1.65291	1.79296	1.6529	0.445002	1.6529	0.154208
1.65362	0.489146	1.65368	0.48397	1.65351	0.516583	1.65368	0.483491	1.65342	1.79637	1.65337	0.44569	1.65342	0.154256
1.65411	0.49074	1.65422	0.484991	1.654	0.518081	1.65413	0.484445	1.65391	1.80037	1.65385	0.446401	1.65391	0.154324
1.65462	0.492617	1.65471	0.485506	1.65448	0.519586	1.65465	0.485498	1.65442	1.80549	1.65435	0.447699	1.65441	0.154352
1.65513	0.494845	1.65518	0.48709	1.65497	0.521516	1.65518	0.486635	1.65493	1.81203	1.65485	0.44988	1.65493	0.154625
1.65563	0.49702	1.65567	0.489708	1.65547	0.523668	1.65571	0.487925	1.65542	1.81935	1.65538	0.452487	1.65544	0.154829
1.65612	0.499006	1.65614	0.491875	1.65597	0.52629	1.65621	0.489242	1.6559	1.82486	1.6559	0.454823	1.65594	0.154888
1.65661	0.50059	1.65666	0.493424	1.65648	0.529405	1.65669	0.49069	1.6564	1.83014	1.65641	0.457044	1.65644	0.155198
1.6571	0.502344	1.6572	0.494687	1.657	0.531952	1.6572	0.492429	1.65692	1.83684	1.65691	0.459054	1.65693	0.155596
1.6576	0.5048	1.65767	0.495711	1.65752	0.533628	1.65772	0.494242	1.65744	1.84465	1.65738	0.460946	1.65743	0.155796
1.65809	0.507482	1.65815	0.496875	1.65801	0.534659	1.65822	0.49598	1.65794	1.8517	1.65785	0.462914	1.65794	0.155927
1.6586	0.50962	1.65865	0.49866	1.65848	0.535463	1.65872	0.497281	1.65844	1.85577	1.65834	0.465269	1.65848	0.155634
1.65909	0.510797	1.65918	0.499981	1.65899	0.536521	1.65921	0.498601	1.65894	1.8584	1.65885	0.468297	1.65899	0.155747
1.65959	0.512042	1.65972	0.500995	1.6595	0.537919	1.65968	0.500136	1.65944	1.86215	1.65935	0.471471	1.65949	0.155882
1.6601	0.513785	1.66018	0.503456	1.66	0.539927	1.66014	0.501752	1.65994	1.86751	1.65985	0.474177	1.65998	0.156096
1.66059	0.5162	1.66067	0.506796	1.66051	0.542151	1.66065	0.503443	1.66045	1.87307	1.66036	0.475922	1.66047	0.156497
1.66109	0.518713	1.66115	0.508804	1.66102	0.5443	1.66115	0.505192	1.66096	1.87908	1.66085	0.477033	1.66097	0.156514
1.6616	0.520678	1.66164	0.509779	1.66152	0.546341	1.66168	0.506748	1.66145	1.88514	1.66135	0.478096	1.66146	0.156373
1.6621	0.522656	1.66216	0.510724	1.66201	0.548236	1.66216	0.508619	1.66194	1.89072	1.66187	0.479643	1.66193	0.156619
1.6626	0.524744	1.6627	0.511974	1.66251	0.550088	1.66265	0.511021	1.66243	1.89683	1.66238	0.481955	1.66241	0.156865
1.6631	0.526555	1.66322	0.513079	1.66301	0.55164	1.66318	0.513029	1.66293	1.90175	1.66288	0.484683	1.66291	0.157055
1.66359	0.527869	1.66374	0.514497	1.6635	0.553251	1.6637	0.513969	1.66343	1.90752	1.66336	0.487191	1.66343	0.157077
1.66408	0.528903	1.66421	0.515739	1.66399	0.555275	1.6642	0.514882	1.66391	1.91431	1.66384	0.489557	1.66392	0.157227
1.66459	0.530864	1.66465	0.516569	1.66449	0.557806	1.66472	0.516202	1.66441	1.91964	1.66435	0.491704	1.66445	0.157348
1.66509	0.534394	1.66512	0.518364	1.66499	0.560344	1.66522	0.517636	1.6649	1.92543	1.66486	0.49384	1.66496	0.157621
1.6656	0.538587	1.66564	0.521194	1.6655	0.562704	1.6657	0.519261	1.6654	1.93143	1.66537	0.496561	1.66544	0.157704
1.66611	0.541754	1.66618	0.523335	1.66599	0.56448	1.6662	0.521022	1.6659	1.93872	1.66586	0.499833	1.66594	0.157883
1.6666	0.543336	1.66667	0.524593	1.66649	0.566095	1.66671	0.522912	1.6664	1.94626	1.66636	0.503084	1.66643	0.15791
1.66709	0.544232	1.6672	0.525966	1.66698	0.56757	1.66721	0.524882	1.6669	1.95266	1.66685	0.505645	1.66692	0.15803
1.66758	0.545362	1.66771	0.527218	1.6675	0.569206	1.66771	0.52669	1.66741	1.95844	1.66735	0.507226	1.66744	0.158166
1.66808	0.547007	1.66823	0.528016	1.668	0.571284	1.66821	0.52835	1.66792	1.96344	1.66786	0.508224	1.66796	0.158533
1.66859	0.549014	1.66869	0.53051	1.6685	0.573636	1.6687	0.529533	1.66843	1.96944	1.66836	0.509282	1.66845	0.159064
1.6691	0.550421	1.66917	0.534583	1.669	0.575989	1.6692	0.530718	1.66891	1.97597	1.66887	0.511097	1.66893	0.159482
1.6696	0.552184	1.66968	0.536975	1.66949	0.577912	1.66969	0.532276	1.66939	1.98114	1.66937	0.513565	1.66944	0.15956
1.67011	0.554963	1.67016	0.538916	1.66998	0.579831	1.67018	0.534147	1.6699	1.98628	1.66986	0.516312	1.66993	0.159551
1.67061	0.558068	1.67068	0.540884	1.67048	0.581549	1.67065	0.536773	1.67041	1.99137	1.67034	0.518897	1.67041	0.159576
1.6711	0.56073	1.67117	0.541855	1.67098	0.58331	1.67114	0.539605	1.67092	1.99667	1.67084	0.521153	1.67092	0.159836
1.67159	0.562752	1.67164	0.542531	1.67146	0.585583	1.67166	0.542292	1.67138	2.00353	1.67136	0.523321	1.67144	0.160042
1.67208	0.564963	1.67212	0.543197	1.67197	0.589073	1.67218	0.544961	1.67186	2.00985	1.67186	0.526067	1.67194	0.160272
1.67257	0.567963	1.67264	0.544439	1.67246	0.59237	1.67268	0.546968	1.6724	2.01481	1.67236	0.529656	1.67242	0.160503
1.67307	0.570832	1.67315	0.545842	1.67297	0.594926	1.67318	0.548026	1.67294	2.02055	1.67286	0.533527	1.67288	0.160635
1.67357	0.572989	1.67367	0.54772	1.67348	0.5966	1.67369	0.54844	1.67343	2.02668	1.67335	0.536647	1.67337	0.160679
1.67406	0.574174	1.67418	0.54925	1.67399	0.597887	1.67419	0.548926	1.67393	2.03208	1.67384	0.538605	1.6739	0.160707
1.67456	0.575393	1.67468	0.550935	1.67451	0.599412	1.67465	0.549954	1.67443	2.03783	1.67434	0.539846	1.67443	0.160724
1.67508	0.577605	1.67519	0.553095	1.67502	0.602024	1.67516	0.551908	1.67491	2.04242	1.67485	0.54137	1.67492	0.16095
1.67559	0.580533	1.67564	0.555462	1.67549	0.605297	1.67565	0.554331	1.67542	2.04685	1.67536	0.5436	1.67541	0.16107
1.67609	0.583623	1.67612	0.557417	1.67598	0.608316	1.67615	0.5568	1.6759	2.05234	1.67586	0.546209	1.67592	0.161137
1.67658	0.586068	1.67662	0.558941	1.67648	0.610675	1.67665	0.558923	1.67639	2.0567	1.67636	0.54904	1.67642	0.161297
1.67707	0.587986	1.67713	0.56082	1.67698	0.612233	1.67717	0.560963	1.67687	2.06169	1.67686	0.551779	1.67692	0.161491
1.67758	0.589955	1.67768	0.562689	1.67748	0.613273	1.67765	0.562725	1.6774	2.06748	1.67736	0.554345	1.67743	0.161685
1.67809	0.592316	1.67817	0.56491	1.67799	0.614524	1.67813	0.564136	1.67791	2.07313	1.67785	0.557011	1.6779	0.161719
1.6786	0.594895	1.67864	0.567545	1.6785	0.616743	1.6786	0.565161	1.67841	2.07779	1.67834	0.560394	1.67838	0.161693
1.6791	0.596928	1.6791	0.569135	1.67901	0.619822	1.67911	0.566603	1.67891	2.08266	1.67884	0.56407	1.67889	0.161695
1.67959	0.59981	1.67957	0.570257	1.67953	0.622978	1.67963	0.569017	1.67941	2.08772	1.67935	0.566949	1.67943	0.161673
1.6801	0.60359	1.68013	0.571942	1.68002	0.625702	1.68017	0.572214	1.67989	2.09309	1.67985	0.569066	1.67996	0.161775
1.6806	0.60683	1.68066	0.573737	1.68051	0.627501	1.68069	0.575295	1.6804	2.09978	1.68035	0.570519	1.68045	0.161893
1.6811	0.609576	1.68118	0.575588	1.68101	0.628403	1.6812	0.577688	1.6809	2.10537	1.68085	0.571929	1.68093	0.162045
1.6816	0.612	1.6817	0.577045	1.6815	0.629151	1.6817	0.579444	1.68141	2.11045	1.68134	0.573913	1.6814	0.162117
1.68211	0.614531	1.68219	0.579015	1.682	0.630356	1.68222	0.580862	1.68191	2.11589	1.68184	0.576894	1.68189	0.162217
1.68262	0.617665	1.68265	0.580783	1.68252	0.632115	1.68268	0.582329	1.68242	2.11968	1.68236	0.580055	1.68241	0.162209
1.68311	0.620396	1.68313	0.582567	1.68301	0.63446	1.68316	0.583899	1.68291	2.1248	1.68287	0.582895	1.68291	0.162255
1.68362	0.622078	1.68366	0.584551	1.68349	0.63684	1.68369	0.585076	1.68341	2.13147	1.68335	0.585495	1.68342	0.162273
1.68412	0.62282	1.68419	0.586029	1.684	0.639468	1.68419	0.586883	1.68391	2.13695	1.68383	0.5884	1.68393	0.162432
1.68461	0.624124	1.6847	0.587462	1.68449	0.641876	1.68468	0.589345	1.68442	2.14223	1.68437	0.592375	1.68443	0.162635
1.68511	0.627652	1.6852	0.589544	1.68497	0.644603	1.68518	0.591995	1.68493	2.14766	1.68489	0.596682	1.68492	0.162764
1.68561	0.632414	1.68565	0.592068	1.68549	0.647609	1.68569	0.594387	1.68541	2.15315	1.68539	0.599894	1.68542	0.162819
1.6861	0.63584	1.68616	0.594469	1.68601	0.650791	1.68619	0.596439	1.68592	2.15889	1.68587	0.601794	1.68591	0.162825
1.6866	0.637458	1.68668	0.597011	1.68652	0.653964	1.68665	0.598746	1.68641	2.16388	1.68638	0.603441	1.6864	0.162829
1.68709	0.63809	1.6872	0.599678	1.68701	0.656917	1.68714	0.601515	1.6869	2.16798	1.68688	0.606275	1.68691	0.162918
1.68759	0.638944	1.6877	0.602171	1.6875	0.658793	1.68764	0.604209	1.68741	2.17106	1.68737	0.610347	1.68742	0.163038
1.68809	0.640716	1.68819	0.604093	1.68798	0.659819	1.68818	0.606735	1.68791	2.17437	1.68787	0.614077	1.68792	0.163191
1.6886	0.642919	1.68869	0.605726	1.68848	0.660546	1.68869	0.608601	1.68841	2.17972	1.68837	0.616779	1.68842	0.163276
1.68911	0.644483	1.68918	0.606337	1.68898	0.66179	1.6892	0.610077	1.68891	2.18544	1.68887	0.618842	1.68892	0.163326
1.6896	0.646588	1.68969	0.607481	1.68947	0.663755	1.6897	0.611719	1.68941	2.19231	1.68938	0.621791	1.68944	0.163316
1.69009	0.650058	1.69023	0.610514	1.68998	0.666135	1.69021	0.614081	1.68992	2.19823	1.68989	0.625876	1.68994	0.163322
1.6906	0.654365	1.69075	0.614295	1.69051	0.668637	1.69069	0.617036	1.69043	2.20279	1.6904	0.62965	1.69041	0.163372
1.69111	0.658493	1.69124	0.617129	1.69102	0.67109	1.69118	0.620025	1.69091	2.20812	1.6909	0.63202	1.69091	0.163429
1.69161	0.662251	1.6917	0.618999	1.6915	0.673435	1.69169	0.622828	1.69138	2.21522	1.69139	0.633056	1.69141	0.163511
1.69209	0.665499	1.69218	0.620183	1.692	0.675856	1.69221	0.625086	1.69189	2.22373	1.69187	0.6338	1.69191	0.163569
1.69258	0.667819	1.69267	0.621103	1.69251	0.678486	1.69271	0.626576	1.69239	2.23061	1.69235	0.635306	1.69239	0.163677
1.6931	0.669203	1.69317	0.622537	1.69302	0.681681	1.69318	0.627639	1.6929	2.23575	1.69284	0.637925	1.6929	0.163828
1.6936	0.67017	1.69368	0.624663	1.69351	0.684929	1.69371	0.628554	1.69338	2.24081	1.69338	0.64125	1.69342	0.163854
1.69409	0.67095	1.69418	0.62697	1.69401	0.687784	1.6942	0.630261	1.69387	2.24651	1.69388	0.644769	1.69394	0.163876
1.6946	0.672774	1.69468	0.629122	1.69451	0.689812	1.69468	0.633344	1.6944	2.25309	1.69436	0.648109	1.69446	0.163916
1.6951	0.676127	1.69519	0.631803	1.695	0.691478	1.69519	0.636877	1.69492	2.2601	1.69485	0.652328	1.69492	0.164019
1.69559	0.679948	1.69573	0.634133	1.6955	0.693105	1.69567	0.639844	1.69542	2.26744	1.69536	0.657133	1.69539	0.164152
1.69608	0.683275	1.69623	0.635392	1.696	0.695256	1.69616	0.641627	1.69592	2.27499	1.69585	0.661132	1.69587	0.164247
1.69658	0.685906	1.69668	0.636259	1.69651	0.697682	1.69667	0.642712	1.69643	2.28383	1.69636	0.66351	1.69638	0.16433
1.69708	0.688587	1.69718	0.637149	1.69703	0.700407	1.69716	0.643816	1.6969	2.2915	1.69688	0.664623	1.69692	0.164445
1.69759	0.691767	1.6977	0.638609	1.69753	0.703056	1.69767	0.645285	1.69741	2.29749	1.69741	0.665664	1.69743	0.164589
1.69809	0.695314	1.6982	0.640731	1.69802	0.705507	1.69818	0.647197	1.6979	2.30305	1.69791	0.667885	1.69793	0.164732
1.69859	0.697918	1.69868	0.642776	1.69851	0.707984	1.6987	0.64862	1.69841	2.30855	1.69838	0.671059	1.69841	0.16492
1.69909	0.699152	1.6992	0.644685	1.69899	0.711384	1.6992	0.650524	1.69891	2.31535	1.69884	0.674476	1.6989	0.165031
1.69959	0.70061	1.69968	0.645993	1.69949	0.715253	1.69972	0.653151	1.69942	2.3216	1.69935	0.677719	1.6994	0.165115
1.70009	0.703447	1.7002	0.64848	1.69999	0.718846	1.70021	0.656042	1.69992	2.32568	1.69988	0.681276	1.69992	0.165163
1.70059	0.707415	1.7007	0.651692	1.7005	0.72128	1.70071	0.659212	1.70041	2.32943	1.70038	0.685768	1.70043	0.165313
1.70109	0.711101	1.70117	0.654895	1.70099	0.722559	1.70121	0.66316	1.7009	2.33478	1.70089	0.69042	1.70092	0.165462
1.70159	0.713794	1.70168	0.658237	1.70149	0.723729	1.7017	0.667446	1.70138	2.34109	1.70139	0.693737	1.70139	0.16553
1.7021	0.716354	1.70219	0.661358	1.70199	0.725512	1.70218	0.670845	1.7019	2.34889	1.70188	0.69549	1.70187	0.165659
1.7026	0.719841	1.7027	0.664386	1.70248	0.72767	1.70267	0.672756	1.70239	2.35503	1.70234	0.696783	1.70239	0.165852
1.7031	0.724168	1.70319	0.666159	1.70297	0.730016	1.70317	0.673658	1.70291	2.36086	1.70283	0.698969	1.70292	0.166136
1.70359	0.727519	1.70367	0.667096	1.70347	0.732154	1.70364	0.674016	1.70341	2.36683	1.70334	0.702126	1.70343	0.166433
1.70409	0.729333	1.70414	0.667779	1.70395	0.734598	1.70414	0.674827	1.70391	2.37265	1.70387	0.705579	1.70393	0.166714
1.70458	0.730755	1.70466	0.668415	1.70445	0.737071	1.70467	0.676735	1.70441	2.38025	1.70438	0.709355	1.70441	0.166981
1.70509	0.732605	1.70519	0.669704	1.70496	0.739722	1.70516	0.679411	1.7049	2.38613	1.70486	0.713436	1.70488	0.167202
1.70559	0.735483	1.70567	0.67222	1.70547	0.74237	1.70566	0.682337	1.70537	2.39146	1.70536	0.718127	1.70538	0.167342
1.70608	0.738846	1.70614	0.674615	1.70598	0.745613	1.70617	0.685111	1.70587	2.3965	1.70585	0.722549	1.70589	0.167517
1.70659	0.74162	1.70666	0.67688	1.70648	0.749021	1.70666	0.687647	1.70637	2.40153	1.70635	0.72553	1.70638	0.167724
1.70709	0.7443	1.70719	0.678959	1.70698	0.751754	1.70715	0.690262	1.70687	2.409	1.70684	0.72721	1.70687	0.167837
1.70758	0.747012	1.70769	0.681217	1.70749	0.753731	1.70766	0.692637	1.70738	2.41598	1.70735	0.728971	1.70742	0.167933
1.70808	0.750127	1.70815	0.68323	1.70799	0.755633	1.70815	0.695472	1.7079	2.42133	1.70784	0.731444	1.70792	0.168053
1.70859	0.753365	1.70864	0.685721	1.70849	0.75778	1.70865	0.698321	1.7084	2.42743	1.70834	0.734667	1.70841	0.168305
1.70909	0.755863	1.70915	0.688273	1.70899	0.760194	1.70916	0.700943	1.70887	2.43347	1.70884	0.738085	1.7089	0.168537
1.70958	0.758662	1.70966	0.690228	1.70949	0.762755	1.70967	0.703468	1.70936	2.43946	1.70933	0.741494	1.7094	0.168664
1.71007	0.761805	1.71018	0.693478	1.70999	0.765597	1.71018	0.705707	1.70987	2.44595	1.70983	0.745496	1.70988	0.168888
1.71058	0.764953	1.71071	0.696315	1.71049	0.768739	1.71066	0.708042	1.7104	2.45055	1.71032	0.750225	1.7104	0.169192
1.7111	0.768404	1.7112	0.698613	1.711	0.772467	1.71114	0.710906	1.71089	2.45398	1.71083	0.754299	1.71089	0.169233
1.71161	0.770936	1.71165	0.700193	1.71152	0.776661	1.71165	0.713663	1.71138	2.45929	1.71137	0.756912	1.71138	0.169097
1.71212	0.773202	1.71214	0.702101	1.71203	0.780545	1.71219	0.716441	1.7119	2.46666	1.71187	0.758399	1.7119	0.169172
1.71262	0.7761	1.71266	0.704233	1.71255	0.783271	1.71272	0.719115	1.71239	2.47509	1.71236	0.760226	1.71242	0.169449
1.71311	0.779993	1.71323	0.706445	1.71305	0.78483	1.71322	0.721742	1.71289	2.48087	1.71284	0.762869	1.71291	0.169781
1.71362	0.78429	1.71375	0.70903	1.71353	0.786086	1.7137	0.723898	1.71338	2.48592	1.71335	0.766068	1.71338	0.170136
1.71413	0.78743	1.7142	0.7111	1.71402	0.788357	1.71418	0.727278	1.71389	2.4914	1.71387	0.769817	1.71387	0.170418
1.71464	0.790679	1.71471	0.713137	1.71451	0.791277	1.71465	0.731527	1.71438	2.49659	1.71438	0.774257	1.71438	0.170783
1.71514	0.793711	1.71525	0.716052	1.71502	0.794822	1.71515	0.734667	1.71491	2.5028	1.71488	0.779704	1.7149	0.171013
1.71564	0.796898	1.71572	0.720376	1.71554	0.797865	1.71568	0.736558	1.71541	2.50863	1.7154	0.784849	1.71542	0.171204
1.71614	0.800607	1.7162	0.724462	1.71604	0.799938	1.7162	0.738135	1.71592	2.513	1.71592	0.788129	1.71591	0.171261
1.71664	0.803842	1.71671	0.727314	1.71652	0.801614	1.7167	0.740232	1.71642	2.51674	1.71642	0.789826	1.71642	0.171515
1.71714	0.806454	1.71722	0.729161	1.717	0.803592	1.71721	0.742785	1.71693	2.52239	1.71691	0.791725	1.7169	0.171814
1.71765	0.808834	1.7177	0.729982	1.71753	0.806453	1.71774	0.745455	1.71743	2.52995	1.7174	0.795075	1.71738	0.172001
1.71817	0.811308	1.71819	0.731175	1.71804	0.80978	1.71825	0.748031	1.71791	2.53792	1.71791	0.799525	1.71789	0.172077
1.71865	0.813885	1.71867	0.733204	1.71853	0.812737	1.71873	0.74994	1.7184	2.54302	1.71842	0.803234	1.71842	0.172366
1.71912	0.815936	1.71916	0.734353	1.71903	0.81475	1.71919	0.751952	1.7189	2.54672	1.71891	0.806095	1.71892	0.17276
1.71962	0.819047	1.71969	0.735869	1.71953	0.816141	1.71968	0.755289	1.7194	2.55123	1.71939	0.809718	1.71943	0.173053
1.72013	0.822735	1.72018	0.739086	1.72004	0.817776	1.7202	0.759441	1.7199	2.55673	1.71989	0.81439	1.71992	0.173348
1.72062	0.825782	1.72067	0.74208	1.72054	0.820068	1.7207	0.763386	1.72038	2.56329	1.72039	0.818331	1.72042	0.17384
1.72112	0.828268	1.72117	0.744454	1.72106	0.823072	1.72116	0.766318	1.72088	2.56986	1.72088	0.82035	1.72093	0.174102
1.72162	0.830366	1.72168	0.746986	1.72155	0.82638	1.72166	0.768468	1.72139	2.57471	1.72139	0.821532	1.72144	0.174244
1.72213	0.833181	1.7222	0.749475	1.72202	0.830239	1.72218	0.770573	1.7219	2.57961	1.72189	0.823385	1.72193	0.174396
1.72263	0.837175	1.7227	0.752793	1.72249	0.835177	1.72267	0.772812	1.7224	2.5848	1.72239	0.82661	1.72241	0.17465
1.72311	0.842754	1.7232	0.756076	1.72301	0.840461	1.72321	0.774794	1.72291	2.59022	1.7229	0.831207	1.72291	0.174926
1.72361	0.847997	1.7237	0.7588	1.72352	0.844435	1.72374	0.776343	1.72344	2.59763	1.72341	0.837276	1.72341	0.175082
1.72412	0.851349	1.72417	0.760394	1.72401	0.846512	1.72424	0.778517	1.72396	2.60478	1.7239	0.843992	1.72392	0.175244
1.72463	0.854198	1.72465	0.761953	1.72452	0.847264	1.72471	0.782184	1.72444	2.61085	1.72438	0.849148	1.72441	0.175588
1.72513	0.856145	1.72511	0.76433	1.72503	0.847686	1.72522	0.787089	1.72492	2.61674	1.72488	0.851479	1.7249	0.175801
1.72564	0.857805	1.72564	0.766368	1.7255	0.848657	1.72573	0.79217	1.72543	2.62141	1.72539	0.85213	1.72539	0.175952
1.72613	0.86004	1.72616	0.768714	1.726	0.850572	1.72622	0.796167	1.72594	2.62631	1.72589	0.853086	1.7259	0.176159
1.72662	0.862568	1.72667	0.771515	1.72652	0.853389	1.72672	0.798414	1.72643	2.6324	1.72639	0.85531	1.72639	0.176475
1.72713	0.865303	1.72719	0.774399	1.72702	0.856718	1.72721	0.799989	1.72694	2.63734	1.72689	0.85882	1.7269	0.176693
1.72764	0.868581	1.72773	0.777604	1.72752	0.859779	1.72771	0.802222	1.72746	2.64291	1.72741	0.862871	1.72741	0.176879
1.72813	0.872054	1.72826	0.781649	1.72802	0.862585	1.72824	0.805221	1.72797	2.64865	1.72789	0.866859	1.7279	0.17717
1.72864	0.87569	1.72877	0.78595	1.72852	0.865292	1.72875	0.80828	1.72846	2.65499	1.72839	0.871604	1.72841	0.177521
1.72915	0.878877	1.72927	0.789025	1.72905	0.868649	1.72922	0.811197	1.72893	2.66224	1.7289	0.877009	1.72889	0.177758
1.72965	0.88262	1.72976	0.790929	1.72955	0.872546	1.72972	0.813629	1.72942	2.6675	1.72938	0.881229	1.72942	0.177961
1.73014	0.886621	1.73024	0.792089	1.73002	0.875858	1.73022	0.81604	1.72994	2.67144	1.72987	0.883657	1.72994	0.178228
1.73063	0.890758	1.73073	0.793672	1.73051	0.878356	1.73073	0.819028	1.73044	2.67523	1.73036	0.885956	1.73042	0.178422
1.73111	0.894431	1.73123	0.796551	1.73103	0.880674	1.73125	0.822517	1.73094	2.67893	1.73087	0.889225	1.7309	0.178606
1.73161	0.897408	1.73174	0.800021	1.73152	0.883129	1.73177	0.825782	1.73145	2.6821	1.73137	0.892941	1.7314	0.17872
1.73211	0.900035	1.73222	0.803278	1.732	0.886039	1.73227	0.828434	1.73191	2.68382	1.73186	0.89656	1.7319	0.178886
1.73262	0.903036	1.73272	0.805947	1.73249	0.889242	1.73274	0.830217	1.73238	2.68815	1.73235	0.900211	1.73241	0.179186
1.73313	0.907334	1.73324	0.807749	1.733	0.892363	1.73325	0.831845	1.7329	2.6949	1.73284	0.905014	1.73293	0.179517
1.7336	0.911728	1.73374	0.809253	1.7335	0.895032	1.73376	0.833716	1.73342	2.70058	1.73336	0.909927	1.73345	0.179836
1.73409	0.914735	1.73423	0.810618	1.734	0.897983	1.73423	0.836428	1.73392	2.70811	1.73387	0.91331	1.73394	0.180067
1.7346	0.917379	1.73475	0.813282	1.7345	0.901991	1.73474	0.8401	1.73441	2.71625	1.73437	0.915668	1.73442	0.180255
1.73511	0.920166	1.73525	0.81695	1.73499	0.90609	1.73519	0.84479	1.73491	2.72489	1.73487	0.918791	1.73491	0.180544
1.73561	0.9241	1.73575	0.820046	1.73549	0.908929	1.73569	0.850678	1.73541	2.7303	1.73537	0.922579	1.73541	0.180931
1.73611	0.928064	1.73625	0.822197	1.73599	0.910877	1.73621	0.856497	1.73589	2.73492	1.73587	0.926387	1.73592	0.181337
1.7366	0.931334	1.73677	0.823527	1.73649	0.912975	1.73673	0.859913	1.73641	2.74114	1.73635	0.930329	1.7364	0.181669
1.73709	0.934189	1.73726	0.824624	1.73698	0.915752	1.73725	0.861123	1.73692	2.74889	1.73685	0.934832	1.7369	0.181886
1.73759	0.937235	1.73772	0.826131	1.73749	0.918867	1.73773	0.861484	1.73743	2.75711	1.73734	0.939758	1.73741	0.182114
1.73808	0.941336	1.73821	0.828771	1.73798	0.921914	1.73823	0.862319	1.73791	2.76309	1.73784	0.943649	1.73791	0.18243
1.73857	0.944992	1.73871	0.832234	1.73846	0.924563	1.73869	0.864199	1.7384	2.76814	1.73835	0.946407	1.73838	0.182804
1.73907	0.947651	1.73921	0.835217	1.73898	0.927199	1.73916	0.867298	1.73892	2.77383	1.73885	0.949084	1.73888	0.183103
1.73958	0.950214	1.73971	0.838924	1.73948	0.930184	1.73968	0.871094	1.73946	2.78112	1.73935	0.952562	1.73938	0.183338
1.74007	0.95384	1.74021	0.84484	1.74	0.933773	1.7402	0.874871	1.73999	2.7885	1.73986	0.956489	1.73989	0.18368
1.74057	0.95873	1.74072	0.849959	1.74051	0.937532	1.7407	0.878267	1.74048	2.79272	1.74037	0.960554	1.74041	0.184155
1.74108	0.96315	1.7412	0.852898	1.74101	0.940505	1.74122	0.882405	1.74094	2.79629	1.74086	0.964802	1.7409	0.184762
1.7416	0.966563	1.74166	0.854494	1.7415	0.942776	1.74173	0.886909	1.74144	2.80243	1.74135	0.969418	1.74142	0.184995
1.74212	0.969857	1.74218	0.855079	1.74198	0.945497	1.74223	0.890524	1.74193	2.80764	1.74185	0.973609	1.74193	0.185282
1.74261	0.974027	1.74271	0.85586	1.74249	0.948633	1.74274	0.893181	1.74242	2.81056	1.74237	0.976539	1.7424	0.185642
1.7431	0.978328	1.74322	0.85774	1.74299	0.952234	1.74322	0.895978	1.74292	2.81543	1.74286	0.978991	1.74287	0.185582
1.74359	0.98104	1.74374	0.860498	1.74349	0.955825	1.74368	0.898523	1.74344	2.82216	1.74335	0.981955	1.74338	0.185495
1.74409	0.982395	1.74421	0.863124	1.74399	0.959762	1.74418	0.901302	1.74396	2.82898	1.74387	0.985654	1.74391	0.185606
1.74459	0.984361	1.7447	0.86506	1.7445	0.964134	1.74469	0.904933	1.74447	2.8361	1.74437	0.989849	1.74444	0.186143
1.74509	0.988067	1.74519	0.867447	1.74503	0.968214	1.74517	0.908936	1.74497	2.8442	1.74487	0.994224	1.74497	0.186661
1.74559	0.993353	1.74569	0.870984	1.74555	0.971031	1.74566	0.913037	1.74545	2.85164	1.74536	0.999406	1.74547	0.187027
1.74609	0.998532	1.74621	0.875387	1.74605	0.973042	1.74617	0.917435	1.74593	2.85567	1.74584	1.00421	1.74593	0.187188
1.7466	1.00281	1.74675	0.879296	1.74653	0.975081	1.7467	0.921091	1.74644	2.85897	1.74635	1.00737	1.74644	0.187502
1.74711	1.00683	1.74725	0.882906	1.74703	0.977714	1.74721	0.923795	1.74695	2.86503	1.74685	1.0097	1.74693	0.187766
1.74761	1.01023	1.74772	0.885365	1.74752	0.980582	1.7477	0.926186	1.74745	2.87269	1.74734	1.01292	1.7474	0.188168
1.74809	1.01312	1.74819	0.887042	1.748	0.983814	1.74818	0.928986	1.74794	2.88032	1.74786	1.01709	1.74789	0.18858
1.7486	1.01546	1.74871	0.889457	1.74851	0.987138	1.7487	0.932036	1.74842	2.88779	1.74838	1.02132	1.74841	0.189335
1.7491	1.0178	1.7492	0.89204	1.74901	0.99068	1.74923	0.935563	1.74893	2.89408	1.74886	1.02543	1.74894	0.189968
1.7496	1.02065	1.74971	0.89422	1.74952	0.99457	1.7497	0.939395	1.74942	2.89978	1.74936	1.03071	1.74946	0.190328
1.75009	1.02487	1.75019	0.897305	1.75001	0.998484	1.75019	0.943313	1.7499	2.90537	1.74985	1.03582	1.74993	0.190463
1.75059	1.03046	1.75071	0.900919	1.75052	1.0019	1.75072	0.94724	1.75039	2.91079	1.75036	1.03903	1.75037	0.190821
1.7511	1.03618	1.75123	0.904028	1.75099	1.00432	1.75123	0.950793	1.7509	2.91534	1.75086	1.0417	1.75084	0.191209
1.75161	1.04059	1.75171	0.907984	1.75148	1.00657	1.75169	0.953902	1.75141	2.91971	1.75137	1.04531	1.75137	0.191422
1.7521	1.04365	1.75221	0.912016	1.75198	1.00972	1.75214	0.957081	1.75191	2.9242	1.75188	1.04946	1.7519	0.191792
1.7526	1.04592	1.75271	0.915275	1.7525	1.01329	1.75266	0.960496	1.7524	2.93005	1.75238	1.05367	1.75243	0.192247
1.75309	1.04873	1.75317	0.917491	1.75299	1.01643	1.75316	0.963945	1.75293	2.93701	1.75288	1.05795	1.75294	0.192608
1.75359	1.05154	1.75367	0.919498	1.75349	1.01926	1.75362	0.96691	1.75344	2.94513	1.75336	1.06324	1.75344	0.192807
1.7541	1.05436	1.75418	0.921301	1.75399	1.02236	1.75414	0.969717	1.75391	2.9526	1.75384	1.06797	1.75394	0.19289
1.7546	1.05732	1.75469	0.923539	1.75449	1.02697	1.75464	0.973894	1.75441	2.95873	1.75435	1.07089	1.75441	0.193025
1.75509	1.06148	1.75516	0.92664	1.75499	1.03122	1.75519	0.979123	1.75493	2.96375	1.75486	1.07372	1.75489	0.193168
1.75561	1.06726	1.75565	0.929735	1.75549	1.03401	1.75571	0.983452	1.75544	2.96977	1.75536	1.07744	1.7554	0.193324
1.75611	1.07264	1.75617	0.932844	1.75598	1.03607	1.7562	0.986429	1.75593	2.97658	1.75586	1.08168	1.75592	0.193504
1.75662	1.07613	1.75665	0.935906	1.75648	1.03857	1.75672	0.98914	1.75644	2.98067	1.75636	1.08551	1.7564	0.193761
1.75711	1.07927	1.75715	0.939012	1.757	1.04191	1.75723	0.992386	1.75693	2.98451	1.75685	1.08962	1.75688	0.193936
1.75758	1.0829	1.75768	0.942685	1.7575	1.04582	1.75771	0.995916	1.7574	2.9906	1.75735	1.09481	1.7574	0.194028
1.75807	1.08667	1.7582	0.945805	1.758	1.04975	1.75821	0.999494	1.7579	2.99838	1.75785	1.09934	1.7579	0.194193
1.75858	1.08963	1.75871	0.948377	1.75849	1.05284	1.7587	1.00228	1.75842	3.00693	1.75835	1.10234	1.7584	0.194383
1.75908	1.09197	1.75919	0.950463	1.759	1.05618	1.75916	1.00524	1.7589	3.01358	1.75886	1.10537	1.75888	0.19461
1.75957	1.09555	1.75965	0.953055	1.75949	1.05993	1.75968	1.00952	1.7594	3.02008	1.75937	1.1097	1.7594	0.194787
1.76007	1.10101	1.76014	0.955862	1.75997	1.06358	1.7602	1.01431	1.7599	3.02652	1.75986	1.1143	1.75994	0.194896
1.76059	1.10607	1.76068	0.959523	1.76047	1.06649	1.76071	1.01828	1.76041	3.03288	1.76036	1.11843	1.76046	0.195074
1.76111	1.11029	1.76118	0.963132	1.76097	1.06942	1.76119	1.02183	1.76093	3.03978	1.76086	1.1233	1.76093	0.195257
1.76162	1.11429	1.76167	0.966083	1.76147	1.07291	1.76168	1.02554	1.76141	3.0455	1.76135	1.12847	1.76141	0.195323
1.76209	1.1181	1.76214	0.969426	1.76199	1.07678	1.76217	1.02932	1.76188	3.05127	1.76186	1.13205	1.76189	0.19545
1.76259	1.12154	1.76263	0.973442	1.7625	1.08023	1.76265	1.03269	1.76236	3.05662	1.76237	1.13438	1.76237	0.195607
1.76309	1.12507	1.76318	0.976924	1.76299	1.08328	1.76315	1.03612	1.76288	3.06267	1.76287	1.1374	1.76289	0.195785
1.76358	1.12846	1.76368	0.979489	1.76349	1.08709	1.76367	1.03915	1.76342	3.07005	1.76339	1.14163	1.76341	0.195982
1.76408	1.13114	1.76417	0.981307	1.764	1.09199	1.76418	1.04297	1.76391	3.07622	1.7639	1.14608	1.76392	0.196199
1.76459	1.13418	1.76467	0.983728	1.76449	1.09579	1.76466	1.04681	1.76441	3.08268	1.76439	1.15049	1.76443	0.196386
1.76508	1.13812	1.76517	0.986645	1.76498	1.09798	1.7652	1.05022	1.76491	3.09055	1.76486	1.15597	1.76491	0.196677
1.76559	1.14316	1.76566	0.989858	1.7655	1.1	1.76572	1.05439	1.76541	3.09987	1.76535	1.16095	1.7654	0.196954
1.76611	1.14821	1.76616	0.993496	1.76601	1.1034	1.76621	1.05915	1.7659	3.1065	1.76584	1.16423	1.76591	0.197215
1.76659	1.15272	1.76668	0.997211	1.7665	1.10751	1.76668	1.06303	1.76639	3.11152	1.76634	1.16698	1.76643	0.197374
1.76708	1.15666	1.76721	1.00046	1.76699	1.1111	1.76718	1.06632	1.76689	3.11669	1.76686	1.17072	1.76692	0.197786
1.76759	1.16141	1.76773	1.00391	1.76748	1.11381	1.7677	1.07028	1.76742	3.12371	1.76737	1.17509	1.7674	0.198244
1.76809	1.1661	1.7682	1.00775	1.768	1.11688	1.7682	1.07437	1.76794	3.1312	1.76785	1.17951	1.76788	0.1986
1.7686	1.16913	1.76868	1.01067	1.76848	1.12095	1.76868	1.07757	1.76843	3.13672	1.76834	1.18482	1.76837	0.198899
1.76909	1.17089	1.76914	1.01233	1.76897	1.1254	1.76915	1.08028	1.76892	3.14198	1.76884	1.19064	1.76887	0.199153
1.76958	1.17366	1.76962	1.01441	1.76947	1.12873	1.76966	1.08371	1.76941	3.1483	1.76933	1.19463	1.76939	0.199378
1.77007	1.17833	1.77015	1.01776	1.76997	1.13198	1.77014	1.08851	1.76989	3.1556	1.76983	1.19747	1.76991	0.199711
1.77058	1.18384	1.77068	1.02137	1.77047	1.13566	1.77064	1.09311	1.77035	3.16327	1.77034	1.20099	1.7704	0.199916
1.77108	1.18903	1.77116	1.02477	1.77098	1.13946	1.77113	1.09695	1.77086	3.16881	1.77086	1.20522	1.7709	0.200099
1.77158	1.194	1.77168	1.02792	1.77148	1.14272	1.77163	1.10128	1.77141	3.17388	1.77137	1.20918	1.77141	0.200389
1.77208	1.1983	1.77217	1.03183	1.772	1.14617	1.77217	1.10634	1.7719	3.18015	1.77185	1.2132	1.77191	0.200771
1.77259	1.20188	1.77267	1.03648	1.77249	1.15101	1.77268	1.1102	1.77239	3.1867	1.77236	1.2181	1.7724	0.201197
1.7731	1.20561	1.77319	1.04013	1.773	1.15584	1.77317	1.113	1.77291	3.19274	1.77286	1.22305	1.77293	0.20154
1.7736	1.20861	1.77366	1.04218	1.7735	1.15916	1.77368	1.11576	1.77338	3.19777	1.77335	1.22686	1.77342	0.201943
1.77408	1.21095	1.77414	1.04329	1.774	1.16128	1.77415	1.1195	1.77389	3.20234	1.77387	1.23047	1.77392	0.20226
1.77457	1.214	1.77469	1.04559	1.77448	1.16402	1.77463	1.12377	1.7744	3.20869	1.77435	1.23457	1.77441	0.202741
1.77507	1.21925	1.77523	1.04989	1.77498	1.16838	1.77515	1.12819	1.77488	3.21562	1.77483	1.23882	1.77489	0.20295
1.77558	1.22579	1.77573	1.05371	1.77549	1.17296	1.77567	1.13319	1.77536	3.22267	1.77535	1.24261	1.7754	0.203026
1.77609	1.23164	1.7762	1.05691	1.77599	1.17646	1.77618	1.13845	1.77589	3.22856	1.77586	1.24738	1.7759	0.203329
1.77658	1.23613	1.7767	1.05973	1.7765	1.17967	1.77667	1.14257	1.77639	3.23278	1.77633	1.253	1.77639	0.203807
1.77708	1.24009	1.77717	1.06291	1.77701	1.18363	1.77717	1.14611	1.77687	3.23447	1.77683	1.25703	1.77691	0.20413
1.77759	1.24397	1.77768	1.06667	1.7775	1.18732	1.77763	1.14997	1.7774	3.23606	1.77735	1.25959	1.77742	0.204453
1.7781	1.24778	1.77818	1.07033	1.778	1.19046	1.77814	1.15368	1.77791	3.2391	1.77788	1.26272	1.77793	0.204825
1.77861	1.25035	1.77867	1.07334	1.77852	1.19366	1.77868	1.15662	1.77841	3.24316	1.77838	1.26701	1.77841	0.205146
1.77911	1.25237	1.77918	1.07486	1.77899	1.19749	1.77919	1.16012	1.77891	3.24831	1.77887	1.27151	1.77891	0.205459
1.77961	1.25631	1.77968	1.07645	1.77946	1.20131	1.7797	1.16482	1.77943	3.25508	1.77935	1.27608	1.7794	0.205706
1.78011	1.26165	1.78021	1.08008	1.77995	1.20515	1.7802	1.17012	1.77993	3.26236	1.77987	1.28195	1.7799	0.206072
1.78061	1.26722	1.78072	1.08501	1.78046	1.20897	1.78066	1.17453	1.78039	3.26854	1.78037	1.28703	1.78041	0.206462
1.7811	1.27254	1.7812	1.08854	1.78098	1.21314	1.78116	1.17886	1.78089	3.27363	1.78085	1.29004	1.7809	0.206815
1.78159	1.27715	1.78169	1.09192	1.78147	1.21722	1.78167	1.18324	1.7814	3.28133	1.78136	1.29326	1.78139	0.207079
1.78209	1.28192	1.78216	1.09569	1.78198	1.22064	1.78219	1.18753	1.78191	3.29012	1.78188	1.29781	1.78192	0.207419
1.7826	1.28731	1.78267	1.1	1.78249	1.22341	1.78266	1.19153	1.7824	3.29725	1.78238	1.30241	1.78244	0.207748
1.78309	1.2918	1.78318	1.10365	1.78298	1.22669	1.78316	1.19519	1.78288	3.30432	1.78288	1.30698	1.78292	0.208069
1.78359	1.29382	1.78368	1.10596	1.78346	1.22994	1.78367	1.19867	1.78338	3.3115	1.78336	1.31268	1.78341	0.208369
1.78407	1.29468	1.78414	1.10795	1.78398	1.2331	1.78419	1.2025	1.78391	3.31779	1.78384	1.31775	1.78393	0.20873
1.78458	1.2972	1.78465	1.11128	1.7845	1.23636	1.7847	1.20664	1.78442	3.32399	1.78435	1.32112	1.78444	0.209174
1.78509	1.30273	1.78517	1.1153	1.785	1.23973	1.78518	1.21121	1.78492	3.33111	1.78487	1.32467	1.78492	0.209546
1.7856	1.3089	1.78569	1.11957	1.7855	1.24383	1.78569	1.21607	1.7854	3.33896	1.78536	1.32914	1.78539	0.20983
1.78609	1.31542	1.7862	1.12288	1.78597	1.24808	1.78617	1.22068	1.78589	3.34743	1.78585	1.33352	1.7859	0.210178
1.78658	1.32086	1.78666	1.12594	1.78646	1.25211	1.78666	1.22533	1.78639	3.35299	1.78636	1.33779	1.78639	0.210359
1.78709	1.32474	1.78714	1.12996	1.78697	1.25561	1.78718	1.23045	1.78692	3.35582	1.78687	1.34308	1.78692	0.210495
1.7876	1.3282	1.78769	1.13371	1.7875	1.25871	1.7877	1.23481	1.78744	3.35748	1.78737	1.34836	1.78741	0.210743
1.78809	1.33263	1.78822	1.13665	1.788	1.26244	1.78817	1.23821	1.78792	3.36042	1.78788	1.35182	1.7879	0.21115
1.78858	1.33575	1.78872	1.13975	1.7885	1.26598	1.78866	1.24129	1.78841	3.36437	1.78837	1.35485	1.78842	0.21162
1.78909	1.33721	1.78923	1.14308	1.78901	1.26963	1.7892	1.24496	1.78892	3.36874	1.78886	1.35885	1.78892	0.211919
1.78959	1.33992	1.78974	1.1457	1.78951	1.27455	1.78972	1.24922	1.78942	3.37416	1.78935	1.36341	1.78944	0.212217
1.79009	1.3454	1.79027	1.14902	1.78998	1.27989	1.7902	1.2538	1.78989	3.38037	1.78986	1.36825	1.78995	0.21257
1.79059	1.35238	1.79076	1.15289	1.7905	1.28365	1.79067	1.25897	1.79039	3.38586	1.79037	1.37409	1.79044	0.212864
1.7911	1.35817	1.79126	1.15761	1.79102	1.28633	1.79118	1.26399	1.79089	3.38958	1.79088	1.37955	1.79091	0.213237
1.79162	1.3636	1.79175	1.16181	1.79152	1.28959	1.79172	1.26835	1.7914	3.39365	1.79139	1.3831	1.79142	0.21364
1.79214	1.36861	1.79222	1.16513	1.79204	1.29358	1.79224	1.27239	1.79195	3.39864	1.7919	1.38619	1.79191	0.21417
1.79264	1.37293	1.79271	1.16798	1.79253	1.29763	1.79274	1.27649	1.79248	3.40448	1.79242	1.39041	1.79243	0.214833
1.79315	1.37762	1.79319	1.17113	1.79301	1.30109	1.79319	1.28059	1.79295	3.41219	1.79291	1.39512	1.79297	0.215537
1.79365	1.38075	1.7937	1.17426	1.79352	1.30477	1.79368	1.2846	1.79344	3.41936	1.79341	1.39961	1.79346	0.215996
1.79416	1.38244	1.79424	1.1771	1.79403	1.30915	1.79422	1.28991	1.79394	3.4273	1.7939	1.40502	1.79395	0.216359
1.79465	1.38565	1.79474	1.17941	1.79451	1.31367	1.79473	1.29528	1.79444	3.43427	1.79441	1.41047	1.79445	0.216787
1.79515	1.39072	1.7952	1.18217	1.79501	1.31728	1.79519	1.29941	1.79492	3.4404	1.79491	1.4145	1.79495	0.217415
1.79563	1.39733	1.7957	1.18652	1.79553	1.32095	1.79568	1.30336	1.79543	3.44581	1.79541	1.41826	1.79544	0.217912
1.79612	1.4037	1.7962	1.19142	1.79604	1.32498	1.79619	1.30798	1.79596	3.45058	1.79591	1.42272	1.79595	0.21848
1.79663	1.41066	1.79672	1.19539	1.79654	1.32888	1.79672	1.31252	1.79646	3.45349	1.7964	1.4274	1.79643	0.219143
1.79712	1.41649	1.79724	1.19849	1.79703	1.33275	1.79724	1.31705	1.79692	3.45695	1.7969	1.432	1.79693	0.21986
1.79762	1.42031	1.7977	1.20152	1.79752	1.3376	1.79774	1.32221	1.79741	3.45967	1.79741	1.43762	1.79744	0.220298
1.79811	1.42384	1.79822	1.20528	1.79802	1.34281	1.79823	1.32695	1.79791	3.4647	1.79792	1.4428	1.79796	0.220744
1.7986	1.42626	1.79876	1.20956	1.7985	1.34633	1.79872	1.33064	1.79842	3.47276	1.79843	1.44622	1.79843	0.221109
1.79911	1.42699	1.79923	1.21246	1.79902	1.34858	1.79921	1.33472	1.79891	3.4801	1.79891	1.44971	1.79893	0.221583
1.79962	1.42952	1.79971	1.21463	1.79954	1.3512	1.79971	1.33965	1.79941	3.487	1.79939	1.45436	1.79943	0.222113
1.80011	1.43485	1.80018	1.218	1.80002	1.35521	1.80022	1.34473	1.79993	3.49309	1.7999	1.4591	1.79994	0.222475
1.80061	1.44235	1.80068	1.22309	1.80049	1.35955	1.80071	1.35012	1.80042	3.49926	1.80038	1.46389	1.80045	0.222804
1.80111	1.44921	1.80118	1.22723	1.80101	1.36271	1.8012	1.35604	1.8009	3.50642	1.80086	1.46931	1.80096	0.223146
1.80161	1.45545	1.80169	1.23048	1.80151	1.36584	1.80168	1.36044	1.80139	3.51232	1.80133	1.47412	1.80145	0.22338
1.8021	1.46122	1.8022	1.233	1.80198	1.36989	1.80214	1.36417	1.80191	3.51779	1.80183	1.47775	1.80193	0.223602
1.8026	1.46525	1.80271	1.23598	1.80247	1.37424	1.80263	1.36848	1.80242	3.52358	1.80235	1.48174	1.80242	0.223796
1.8031	1.46888	1.80319	1.23956	1.80297	1.37821	1.80316	1.37305	1.80291	3.53348	1.80287	1.48642	1.80291	0.22404
1.8036	1.47132	1.80365	1.2431	1.80348	1.38219	1.80367	1.37718	1.80339	3.54184	1.80338	1.49085	1.80341	0.224213
1.8041	1.47167	1.80416	1.24682	1.80399	1.38748	1.80419	1.38219	1.80391	3.54818	1.80388	1.49584	1.80391	0.224582
1.8046	1.47484	1.80468	1.25034	1.80451	1.39229	1.8047	1.3879	1.80443	3.55468	1.80439	1.50186	1.8044	0.224922
1.8051	1.48037	1.80519	1.2542	1.80501	1.39651	1.80515	1.39272	1.80494	3.56038	1.80487	1.50658	1.8049	0.225251
1.80559	1.48719	1.80569	1.25857	1.80549	1.40168	1.80563	1.39731	1.80538	3.56809	1.80535	1.50977	1.8054	0.225517
1.8061	1.49408	1.80619	1.26216	1.806	1.40656	1.80616	1.40247	1.80588	3.57488	1.80586	1.51345	1.80589	0.22574
1.80659	1.50041	1.80668	1.26553	1.80649	1.40978	1.80667	1.40739	1.8064	3.58038	1.80636	1.51818	1.8064	0.225885
1.80709	1.50653	1.80719	1.26947	1.80696	1.413	1.80717	1.41285	1.80692	3.58439	1.80686	1.5225	1.80693	0.22596
1.80761	1.51136	1.80772	1.27335	1.80746	1.41698	1.80765	1.41845	1.8074	3.58972	1.80737	1.52705	1.80741	0.225997
1.80811	1.51543	1.80822	1.27705	1.80799	1.42117	1.80817	1.42317	1.80791	3.59727	1.80787	1.53308	1.8079	0.226145
1.80861	1.51795	1.8087	1.28128	1.80852	1.42505	1.80866	1.42735	1.80839	3.60408	1.80838	1.53782	1.8084	0.226333
1.80911	1.5184	1.80918	1.28529	1.80903	1.42925	1.80917	1.43183	1.80889	3.60877	1.80887	1.54108	1.8089	0.226583
1.80962	1.52175	1.80965	1.28826	1.80953	1.43373	1.80969	1.43685	1.80938	3.61411	1.80938	1.54541	1.80941	0.226818
1.81012	1.52747	1.81015	1.29129	1.81002	1.43816	1.81022	1.44221	1.80989	3.62033	1.80989	1.55073	1.80993	0.227057
1.81062	1.53515	1.81068	1.29484	1.8105	1.44196	1.81072	1.44791	1.81043	3.62688	1.81039	1.55558	1.81041	0.227318
1.81112	1.54282	1.81121	1.29862	1.81101	1.44595	1.81122	1.45303	1.81092	3.63397	1.81088	1.56117	1.8109	0.227684
1.81162	1.54877	1.8117	1.30264	1.8115	1.45042	1.81172	1.45751	1.81144	3.63999	1.81137	1.56676	1.81141	0.227985
1.81211	1.55365	1.81222	1.30624	1.81199	1.45454	1.81219	1.46249	1.81195	3.64554	1.81187	1.57032	1.8119	0.22832
1.81262	1.55784	1.81272	1.31004	1.8125	1.45852	1.8127	1.46744	1.81243	3.65024	1.81236	1.57317	1.81244	0.228731
1.81312	1.56209	1.81322	1.31338	1.81302	1.46292	1.81321	1.47194	1.81292	3.65766	1.81287	1.5773	1.81295	0.229123
1.81361	1.56533	1.81373	1.31721	1.81353	1.46776	1.81372	1.47639	1.81343	3.66644	1.81339	1.58226	1.81346	0.229474
1.81411	1.56643	1.81423	1.32131	1.81402	1.47159	1.81423	1.48118	1.81392	3.67274	1.81388	1.58706	1.81393	0.229896
1.8146	1.56998	1.81473	1.32502	1.8145	1.47504	1.81472	1.48584	1.81442	3.67787	1.81438	1.5929	1.8144	0.230364
1.81511	1.57552	1.8152	1.32931	1.815	1.47862	1.81522	1.49087	1.81493	3.6834	1.81488	1.59866	1.81491	0.230975
1.8156	1.58213	1.81568	1.33313	1.8155	1.48249	1.81572	1.49627	1.81543	3.69056	1.81537	1.60259	1.81542	0.231655
1.81609	1.58933	1.81618	1.33677	1.81599	1.48616	1.81624	1.50122	1.81593	3.69878	1.81586	1.60642	1.81593	0.232112
1.81659	1.59583	1.81668	1.34031	1.81648	1.48967	1.81673	1.50632	1.81642	3.70605	1.81635	1.61086	1.81645	0.232521
1.81711	1.60188	1.81721	1.34466	1.81698	1.49392	1.81719	1.51183	1.81691	3.71202	1.81685	1.61538	1.81691	0.232858
1.81763	1.60615	1.81772	1.34933	1.8175	1.49869	1.81768	1.51658	1.8174	3.71533	1.81736	1.62041	1.81743	0.233279
1.81811	1.60949	1.81819	1.35303	1.818	1.50234	1.81817	1.52089	1.81793	3.71926	1.81788	1.62639	1.81793	0.233809
1.81858	1.61192	1.8187	1.35619	1.8185	1.5056	1.8187	1.52553	1.81843	3.72363	1.81839	1.63135	1.81842	0.234233
1.81909	1.6137	1.81921	1.35942	1.81901	1.50979	1.8192	1.53039	1.81892	3.7291	1.81889	1.63492	1.81891	0.234721
1.81961	1.61785	1.81969	1.36329	1.81951	1.51433	1.81967	1.53615	1.81941	3.7355	1.81938	1.63914	1.81944	0.235052
1.82012	1.62382	1.82018	1.36735	1.82	1.51872	1.82021	1.543	1.81988	3.74223	1.81989	1.64424	1.81995	0.235535
1.82062	1.63146	1.82069	1.37115	1.82051	1.52334	1.82072	1.54801	1.82041	3.74752	1.82038	1.64952	1.82046	0.236242
1.82112	1.63841	1.8212	1.37517	1.82104	1.52869	1.82118	1.55222	1.82092	3.7535	1.82089	1.65571	1.82094	0.236878
1.82162	1.64411	1.82168	1.37927	1.82155	1.53284	1.82168	1.55765	1.82143	3.75773	1.82138	1.66131	1.82146	0.237198
1.82213	1.64885	1.82215	1.3833	1.82204	1.53524	1.82221	1.56293	1.82191	3.76112	1.82186	1.66491	1.82197	0.237423
1.82263	1.653	1.82263	1.38723	1.82252	1.53781	1.82273	1.56798	1.82242	3.76927	1.82235	1.6685	1.82244	0.237851
1.82312	1.65773	1.82314	1.39134	1.82303	1.5415	1.82318	1.57354	1.82292	3.77975	1.82285	1.67331	1.82289	0.238261
1.82361	1.6626	1.82368	1.39503	1.82354	1.54594	1.82366	1.57828	1.82343	3.78895	1.82336	1.67828	1.82338	0.238705
1.82411	1.66522	1.8242	1.39801	1.82404	1.55001	1.82412	1.58265	1.82391	3.79504	1.82386	1.68367	1.82392	0.239138
1.82461	1.66823	1.82473	1.40062	1.82453	1.55404	1.82464	1.58812	1.82443	3.80132	1.82435	1.69022	1.82443	0.239679
1.82512	1.67331	1.82521	1.40538	1.82503	1.55887	1.82517	1.59393	1.82493	3.80755	1.82486	1.6949	1.82493	0.239983
1.82562	1.68	1.82566	1.41038	1.82552	1.56326	1.8257	1.60052	1.82544	3.81454	1.82538	1.69834	1.82545	0.240194
1.8261	1.6869	1.82619	1.41448	1.82601	1.56645	1.82624	1.60704	1.82596	3.82053	1.82587	1.7029	1.82594	0.240475
1.82659	1.69335	1.82669	1.41772	1.82652	1.56964	1.82673	1.61181	1.82648	3.82492	1.82636	1.7079	1.82643	0.240807
1.82711	1.69849	1.82719	1.42093	1.82702	1.5733	1.82722	1.61634	1.82697	3.82985	1.82687	1.71237	1.82696	0.241087
1.82762	1.70267	1.82768	1.42507	1.8275	1.57705	1.82774	1.62144	1.82744	3.83517	1.82737	1.71752	1.82748	0.241346
1.82811	1.70704	1.82817	1.42971	1.82798	1.58084	1.82824	1.62644	1.82794	3.84121	1.82787	1.72284	1.82796	0.24163
1.8286	1.71105	1.8287	1.43359	1.82847	1.58586	1.82872	1.63147	1.82843	3.84719	1.82839	1.72695	1.82842	0.241975
1.8291	1.71261	1.82922	1.43617	1.82899	1.59212	1.82923	1.63714	1.82891	3.85281	1.82889	1.7312	1.82893	0.242283
1.8296	1.71565	1.82974	1.43849	1.82952	1.59667	1.82973	1.64256	1.82943	3.85683	1.82939	1.73651	1.82944	0.242605
1.83012	1.7217	1.83019	1.44252	1.83002	1.60008	1.8302	1.64823	1.82995	3.86108	1.82989	1.74174	1.82993	0.242902
1.83062	1.72892	1.83065	1.44731	1.8305	1.60426	1.83065	1.65411	1.83046	3.8673	1.83038	1.74763	1.8304	0.243317
1.83109	1.73596	1.83116	1.45144	1.831	1.60854	1.83117	1.65943	1.83094	3.87399	1.83087	1.75384	1.83091	0.243819
1.83158	1.74165	1.83167	1.45538	1.8315	1.61254	1.83168	1.66543	1.8314	3.8803	1.83136	1.75808	1.83141	0.244406
1.83207	1.74624	1.83217	1.45944	1.832	1.61695	1.83216	1.6712	1.83191	3.88434	1.83186	1.76142	1.83192	0.245287
1.83256	1.75097	1.83266	1.46351	1.83249	1.62185	1.83262	1.67578	1.83241	3.8892	1.83236	1.76566	1.83243	0.246092
1.83307	1.7566	1.83317	1.46737	1.83297	1.62598	1.83313	1.68065	1.83289	3.89527	1.83286	1.77034	1.83295	0.24653
1.83358	1.76124	1.83366	1.47212	1.83349	1.62944	1.83365	1.68549	1.8334	3.90155	1.83335	1.7755	1.83343	0.247027
1.83408	1.76383	1.83419	1.47702	1.834	1.6336	1.83418	1.69025	1.83392	3.90848	1.83385	1.78205	1.8339	0.247572
1.83457	1.7675	1.83472	1.481	1.83449	1.63848	1.83469	1.69637	1.83439	3.91545	1.83436	1.7874	1.83436	0.248272
1.83508	1.7729	1.83523	1.485	1.83497	1.64267	1.83518	1.70253	1.83488	3.91956	1.83486	1.7912	1.83487	0.248828
1.83561	1.78022	1.83569	1.48954	1.83547	1.64718	1.83568	1.7079	1.83539	3.92454	1.83536	1.79547	1.8354	0.249449
1.83612	1.78889	1.83612	1.49364	1.83598	1.65307	1.83621	1.7139	1.8359	3.92891	1.83587	1.80028	1.83594	0.250198
1.83661	1.79451	1.83664	1.49675	1.83648	1.65787	1.83671	1.7194	1.83642	3.93158	1.83638	1.80557	1.83642	0.25118
1.83709	1.79892	1.83714	1.50001	1.83697	1.66095	1.83721	1.72531	1.83693	3.93843	1.83689	1.81191	1.83689	0.251889
1.83758	1.80348	1.83764	1.50496	1.83747	1.66392	1.83771	1.73166	1.83743	3.94208	1.83738	1.81753	1.83742	0.252375
1.83809	1.80842	1.83816	1.50932	1.83798	1.66837	1.83819	1.7366	1.8379	3.94486	1.83788	1.82098	1.83793	0.252684
1.83859	1.81197	1.83867	1.5132	1.8385	1.67286	1.83867	1.74113	1.83839	3.94871	1.83837	1.82454	1.83842	0.253228
1.83909	1.81518	1.83918	1.51743	1.83899	1.67678	1.83916	1.74629	1.83888	3.95302	1.83886	1.82912	1.8389	0.253473
1.83959	1.82019	1.83973	1.52187	1.83948	1.68082	1.83969	1.75196	1.83939	3.95939	1.83937	1.8339	1.83941	0.253551
1.84011	1.82637	1.84026	1.52672	1.84001	1.68599	1.84023	1.75841	1.8399	3.96799	1.83988	1.83985	1.83992	0.254005
1.84062	1.83365	1.8407	1.53208	1.84053	1.69031	1.84071	1.76485	1.84043	3.97642	1.84037	1.84655	1.84041	0.254853
1.84112	1.84104	1.84119	1.53734	1.84102	1.69422	1.84117	1.77076	1.84094	3.98157	1.84085	1.85096	1.84091	0.255396
1.84162	1.84818	1.84167	1.54079	1.8415	1.69874	1.84169	1.77616	1.84143	3.98675	1.84136	1.8538	1.84143	0.255719
1.8421	1.85341	1.8422	1.54345	1.84199	1.70257	1.84222	1.78145	1.84192	3.99236	1.84187	1.85782	1.84192	0.255991
1.84261	1.85716	1.84272	1.54722	1.84248	1.70574	1.84273	1.78748	1.84243	3.99724	1.84238	1.86287	1.8424	0.256234
1.84311	1.86134	1.84318	1.55157	1.84298	1.70968	1.84324	1.79395	1.84293	4.00716	1.84288	1.86803	1.84292	0.256482
1.8436	1.86516	1.84368	1.55558	1.84348	1.71516	1.84368	1.79846	1.84345	4.01731	1.84339	1.87417	1.84342	0.256698
1.84409	1.86731	1.8442	1.55957	1.84399	1.72	1.84415	1.8026	1.84396	4.026	1.8439	1.88002	1.84391	0.256949
1.84459	1.87083	1.84469	1.56383	1.8445	1.72367	1.8447	1.80824	1.84444	4.03466	1.84438	1.88375	1.84442	0.257182
1.8451	1.87736	1.84519	1.56798	1.84498	1.7275	1.84521	1.81429	1.84492	4.04207	1.84488	1.88791	1.84491	0.257422
1.8456	1.88514	1.84568	1.57241	1.84548	1.73156	1.84572	1.82084	1.8454	4.04844	1.84538	1.89336	1.84541	0.257655
1.84609	1.89307	1.84619	1.57631	1.84598	1.73553	1.84621	1.82699	1.84591	4.05352	1.84588	1.89848	1.84591	0.257952
1.84659	1.89995	1.84671	1.58019	1.8465	1.73982	1.8467	1.83235	1.84641	4.05752	1.8464	1.90415	1.84641	0.258311
1.84709	1.90678	1.84722	1.58354	1.847	1.7442	1.84723	1.83801	1.84692	4.06183	1.84689	1.91018	1.84692	0.258771
1.84759	1.91308	1.8477	1.58721	1.84751	1.7493	1.84774	1.84384	1.84742	4.06826	1.84738	1.91455	1.84745	0.259299
1.84809	1.91819	1.84817	1.59123	1.848	1.75372	1.84825	1.85032	1.84789	4.07518	1.84785	1.91857	1.84798	0.259774
1.8486	1.92125	1.8487	1.59625	1.84849	1.75764	1.84872	1.85699	1.84842	4.0814	1.84835	1.92364	1.84849	0.260155
1.8491	1.92228	1.84924	1.60128	1.84899	1.76184	1.8492	1.86174	1.84893	4.08879	1.84885	1.92878	1.84897	0.260657
1.8496	1.9254	1.84973	1.60471	1.84951	1.76606	1.84972	1.86709	1.84941	4.097	1.84935	1.93488	1.84945	0.26115
1.85011	1.93141	1.85024	1.60694	1.85003	1.77049	1.85024	1.87317	1.84991	4.1038	1.84986	1.94135	1.84997	0.261628
1.85061	1.93984	1.85074	1.61102	1.85052	1.77629	1.85073	1.87929	1.85043	4.10743	1.85036	1.94577	1.85046	0.262139
1.85111	1.94838	1.8512	1.61616	1.85102	1.78153	1.85122	1.88565	1.85094	4.11163	1.85086	1.9497	1.85094	0.262658
1.85161	1.95583	1.85167	1.6202	1.8515	1.78482	1.85173	1.89139	1.85143	4.11765	1.85137	1.95453	1.85146	0.263056
1.85209	1.96229	1.85217	1.6246	1.85199	1.78748	1.85219	1.89715	1.85192	4.12225	1.85186	1.95933	1.85194	0.263531
1.8526	1.96733	1.85267	1.62998	1.85249	1.79103	1.85266	1.90327	1.85244	4.12863	1.85237	1.96458	1.85243	0.264077
1.8531	1.97324	1.85318	1.63412	1.853	1.79575	1.85316	1.909	1.85294	4.13625	1.85287	1.97101	1.85291	0.264719
1.85361	1.97747	1.85368	1.63778	1.85351	1.80046	1.85366	1.91513	1.85345	4.14387	1.85335	1.97591	1.85345	0.265365
1.85412	1.97861	1.8542	1.6425	1.85401	1.80555	1.85417	1.92082	1.85395	4.14989	1.85386	1.97975	1.85396	0.266021
1.8546	1.98148	1.85472	1.64704	1.8545	1.81082	1.85472	1.92608	1.85443	4.15555	1.85436	1.98479	1.85444	0.266648
1.8551	1.98752	1.8552	1.65057	1.85501	1.81497	1.85525	1.93249	1.85491	4.16174	1.85487	1.99012	1.85493	0.267263
1.85561	1.99557	1.85567	1.65595	1.85554	1.81825	1.85574	1.93853	1.85539	4.16727	1.85536	1.99612	1.85546	0.267766
1.85612	2.00381	1.85622	1.66222	1.85604	1.82225	1.85621	1.9449	1.85588	4.17154	1.85585	2.00274	1.85597	0.268433
1.85663	2.01098	1.85673	1.66615	1.85653	1.82706	1.85671	1.9517	1.85641	4.17748	1.85637	2.00732	1.85647	0.269212
1.85714	2.01654	1.85717	1.66849	1.85701	1.83198	1.85719	1.95768	1.85694	4.18848	1.8569	2.01089	1.85696	0.269949
1.85765	2.02159	1.85764	1.67147	1.85751	1.83785	1.85767	1.96383	1.85745	4.20073	1.85742	2.01516	1.85745	0.270516
1.85814	2.0271	1.85817	1.67594	1.85804	1.84368	1.85817	1.9694	1.85795	4.20954	1.85791	2.01992	1.85796	0.271003
1.85862	2.03125	1.85872	1.68074	1.85854	1.84762	1.85867	1.97513	1.85845	4.2165	1.85839	2.02503	1.85844	0.271351
1.85911	2.03176	1.85923	1.6857	1.85901	1.8511	1.85917	1.98176	1.85896	4.22314	1.85887	2.03164	1.85892	0.271773
1.85961	2.03573	1.85973	1.69151	1.85949	1.85551	1.85968	1.98756	1.85944	4.2297	1.85938	2.03722	1.85942	0.272304
1.86012	2.04286	1.86022	1.69648	1.85998	1.86054	1.86018	1.99369	1.85992	4.23789	1.85989	2.04156	1.85993	0.273042
1.86063	2.05076	1.86069	1.70193	1.8605	1.86507	1.86071	1.9999	1.86042	4.24623	1.86039	2.04663	1.86045	0.273695
1.86114	2.05814	1.86116	1.70715	1.86104	1.87002	1.86122	2.00634	1.86091	4.25527	1.86091	2.0519	1.86093	0.27429
1.86162	2.06564	1.86165	1.71185	1.86157	1.87467	1.86175	2.01291	1.8614	4.26312	1.86142	2.05754	1.86142	0.274855
1.86212	2.07157	1.86215	1.7163	1.86208	1.87874	1.86225	2.01824	1.8619	4.26825	1.86191	2.06421	1.86191	0.27562
1.86262	2.07616	1.86269	1.7235	1.86257	1.88329	1.86273	2.02378	1.86242	4.27444	1.8624	2.06924	1.86242	0.2762
1.86312	2.08101	1.86318	1.72924	1.86305	1.88815	1.86318	2.0295	1.86291	4.2829	1.86289	2.07294	1.86293	0.277262
1.86362	2.0854	1.86366	1.73351	1.86351	1.8926	1.86367	2.03545	1.86341	4.29038	1.86338	2.07766	1.86342	0.27837
1.86412	2.08814	1.86416	1.73764	1.864	1.89704	1.86417	2.04261	1.86393	4.2954	1.86386	2.0829	1.86392	0.279511
1.86461	2.09293	1.86466	1.74118	1.86449	1.90266	1.8647	2.04876	1.86443	4.29667	1.86437	2.08877	1.86441	0.280597
1.8651	2.10105	1.86515	1.74547	1.86498	1.90771	1.86521	2.05455	1.86492	4.29963	1.86488	2.09558	1.8649	0.281546
1.8656	2.10846	1.86563	1.75082	1.86548	1.91118	1.86574	2.06079	1.86544	4.30415	1.86538	2.10088	1.86543	0.282588
1.86609	2.1154	1.86613	1.75598	1.86597	1.91552	1.86622	2.06707	1.86594	4.31044	1.86587	2.10497	1.86595	0.283467
1.86659	2.1219	1.86668	1.75988	1.86649	1.92064	1.8667	2.07371	1.86641	4.30394	1.86637	2.10915	1.86647	0.284209
1.8671	2.12893	1.86724	1.76389	1.867	1.92502	1.8672	2.07976	1.8669	4.28247	1.86686	2.11371	1.86699	0.284859
1.86761	2.13505	1.86775	1.76796	1.8675	1.92992	1.86771	2.08586	1.86742	4.27551	1.86736	2.1188	1.86748	0.285366
1.8681	2.14031	1.86821	1.7719	1.86798	1.93549	1.86819	2.09214	1.86794	4.28358	1.86787	2.12528	1.86795	0.286002
1.86861	2.14443	1.8687	1.77591	1.86848	1.9403	1.86866	2.09845	1.86841	4.29434	1.86838	2.13098	1.86844	0.286672
1.86912	2.14508	1.86924	1.77905	1.86897	1.94499	1.86914	2.10556	1.86892	4.30287	1.8689	2.135	1.86893	0.287229
1.86961	2.14756	1.86978	1.78345	1.86948	1.95003	1.86966	2.11167	1.86943	4.30726	1.8694	2.13997	1.86944	0.287583
1.8701	2.15501	1.87027	1.78889	1.86998	1.95451	1.87018	2.11787	1.86993	4.30952	1.8699	2.14534	1.86993	0.287914
1.87059	2.16531	1.87071	1.79265	1.87049	1.95889	1.87071	2.12416	1.87041	4.31387	1.87038	2.15062	1.87041	0.288187
1.87109	2.17395	1.87121	1.79589	1.87099	1.96476	1.87122	2.13074	1.87088	4.32116	1.87089	2.15673	1.87089	0.288418
1.87159	2.18106	1.8717	1.80026	1.8715	1.96999	1.87168	2.13744	1.87139	4.32722	1.87139	2.16202	1.87143	0.288583
1.8721	2.18694	1.87224	1.80521	1.87202	1.97365	1.87216	2.14342	1.87195	4.3289	1.87189	2.1661	1.87196	0.288825
1.87261	2.19304	1.87277	1.80935	1.87252	1.97727	1.8727	2.14998	1.87245	4.33178	1.87239	2.17105	1.87245	0.289059
1.87311	2.19877	1.87324	1.81358	1.87302	1.98194	1.87321	2.15644	1.87293	4.34219	1.87289	2.17632	1.87293	0.289406
1.8736	2.20292	1.87373	1.81878	1.8735	1.98649	1.87372	2.16317	1.87343	4.35414	1.87337	2.18176	1.87342	0.289701
1.8741	2.20437	1.8742	1.8231	1.874	1.99149	1.87424	2.16984	1.87394	4.36522	1.87387	2.18844	1.87394	0.29012
1.8746	2.20867	1.87469	1.82683	1.87452	1.99731	1.87476	2.17565	1.87444	4.37482	1.87437	2.19406	1.87446	0.290668
1.87511	2.21575	1.87522	1.83104	1.87504	2.00228	1.87525	2.18215	1.87493	4.38179	1.87489	2.19845	1.87493	0.291204
1.87561	2.22539	1.87571	1.8377	1.87553	2.00667	1.87571	2.18848	1.87545	4.3892	1.87541	2.2038	1.8754	0.29182
1.87611	2.23438	1.8762	1.84502	1.876	2.0118	1.87617	2.19541	1.87597	4.3967	1.87588	2.20917	1.87587	0.29251
1.87661	2.24207	1.87672	1.85059	1.8765	2.01652	1.87668	2.20242	1.87645	4.40375	1.87637	2.21456	1.8764	0.293253
1.87709	2.24771	1.87722	1.85419	1.87702	2.02174	1.87719	2.20876	1.87696	4.41249	1.87686	2.22062	1.87694	0.294029
1.87759	2.25326	1.87769	1.8574	1.87753	2.02808	1.8777	2.21508	1.87747	4.42048	1.87736	2.22536	1.87742	0.294821
1.87809	2.25951	1.87819	1.86199	1.87804	2.0331	1.87818	2.22129	1.87798	4.42857	1.87786	2.22891	1.87792	0.295562
1.8786	2.26278	1.87871	1.86708	1.87853	2.03694	1.87868	2.22782	1.87848	4.43905	1.87838	2.2335	1.87842	0.296383
1.87912	2.2625	1.87918	1.87125	1.87901	2.04134	1.8792	2.23399	1.87896	4.44886	1.87887	2.23882	1.87891	0.297179
1.87961	2.26527	1.87968	1.87539	1.87951	2.04614	1.87973	2.23996	1.87942	4.45618	1.87938	2.24448	1.8794	0.297921
1.88011	2.27202	1.88022	1.88019	1.88	2.05102	1.88024	2.24662	1.87993	4.46357	1.87988	2.25105	1.87992	0.298666
1.88061	2.28193	1.88075	1.88538	1.8805	2.0561	1.88074	2.25333	1.88046	4.47044	1.88038	2.25661	1.88045	0.299518
1.88112	2.29136	1.88123	1.88991	1.88101	2.06167	1.88124	2.26091	1.88095	4.47709	1.88089	2.26069	1.88093	0.300365
1.88161	2.29851	1.88168	1.89475	1.88152	2.06601	1.88172	2.26732	1.88144	4.48307	1.88138	2.26498	1.88141	0.301105
1.8821	2.30435	1.88216	1.89928	1.88201	2.06972	1.88218	2.27306	1.88193	4.48941	1.88189	2.27007	1.88193	0.301755
1.88261	2.31002	1.88264	1.90398	1.88249	2.07422	1.88268	2.27898	1.88242	4.49757	1.88238	2.27586	1.88245	0.302381
1.88313	2.3167	1.88319	1.90961	1.88299	2.07915	1.88318	2.28567	1.88293	4.50526	1.88287	2.28254	1.88295	0.302985
1.88363	2.32003	1.88368	1.91473	1.88351	2.08428	1.88371	2.29294	1.88345	4.51231	1.88336	2.28773	1.88342	0.303608
1.88412	2.31815	1.88418	1.91827	1.88401	2.08998	1.88422	2.29892	1.88393	4.51984	1.88387	2.29155	1.88393	0.304299
1.88463	2.3207	1.88471	1.92094	1.88452	2.09502	1.88472	2.30526	1.8844	4.52708	1.88438	2.29632	1.88445	0.305101
1.88513	2.32737	1.8852	1.92608	1.88501	2.09833	1.8852	2.31201	1.88492	4.53588	1.8849	2.30209	1.88496	0.305913
1.88563	2.33597	1.88573	1.9323	1.88549	2.10154	1.88571	2.31882	1.88543	4.54225	1.88539	2.30831	1.88543	0.306863
1.88612	2.34512	1.88624	1.9383	1.886	2.10518	1.88618	2.32603	1.88595	4.54637	1.88589	2.31504	1.88591	0.307924
1.88661	2.35405	1.88674	1.94431	1.88651	2.10942	1.88668	2.33249	1.88646	4.55191	1.8864	2.31996	1.88639	0.3088
1.88711	2.36168	1.88722	1.94933	1.88703	2.1134	1.88722	2.33924	1.88695	4.55738	1.8869	2.32423	1.8869	0.309817
1.88762	2.36785	1.88768	1.95459	1.88752	2.11798	1.8877	2.34551	1.88745	4.56289	1.8874	2.32948	1.88741	0.311161
1.88812	2.37226	1.88814	1.96005	1.88801	2.12336	1.88818	2.35266	1.88794	4.57023	1.88789	2.33492	1.88791	0.312523
1.88863	2.37473	1.88867	1.96443	1.88853	2.12819	1.8887	2.3592	1.88844	4.5767	1.88838	2.34159	1.88844	0.314111
1.88912	2.37506	1.88918	1.96826	1.88902	2.13274	1.88921	2.36515	1.88894	4.58416	1.88888	2.34825	1.88896	0.315451
1.88961	2.37901	1.88969	1.9709	1.88951	2.13812	1.8897	2.37173	1.88946	4.59288	1.88938	2.35265	1.88944	0.316299
1.89011	2.38684	1.89017	1.97618	1.89002	2.14333	1.89022	2.37801	1.88996	4.60331	1.88987	2.35721	1.88992	0.316909
1.89061	2.39645	1.8907	1.98109	1.89051	2.14891	1.89073	2.38518	1.89043	4.61377	1.89037	2.36283	1.89041	0.317456
1.89111	2.40515	1.89123	1.98545	1.891	2.15443	1.89119	2.39222	1.89091	4.6216	1.89087	2.36839	1.89092	0.318085
1.89161	2.41333	1.89169	1.99081	1.89151	2.15879	1.89165	2.39905	1.89145	4.63122	1.89139	2.37474	1.89144	0.318566
1.89212	2.42043	1.89217	1.99538	1.89201	2.16196	1.89214	2.40581	1.89198	4.64048	1.8919	2.3804	1.89196	0.318982
1.89262	2.42605	1.89267	2.00024	1.89249	2.16619	1.89269	2.41314	1.89249	4.64934	1.89238	2.38388	1.89243	0.319385
1.89312	2.43109	1.89317	2.0058	1.89298	2.17102	1.89322	2.42042	1.89301	4.6592	1.89289	2.38785	1.89293	0.319735
1.89362	2.43432	1.8937	2.00994	1.8935	2.17544	1.8937	2.42647	1.8935	4.66758	1.89339	2.39321	1.89344	0.320074
1.89413	2.43724	1.89423	2.01313	1.894	2.18044	1.89417	2.4331	1.89398	4.6747	1.8939	2.39829	1.89393	0.320484
1.89463	2.44365	1.8947	2.01657	1.8945	2.18613	1.89466	2.43961	1.89447	4.68209	1.89439	2.40473	1.8944	0.320971
1.89513	2.45141	1.89518	2.02133	1.89499	2.19039	1.89517	2.44663	1.89495	4.69151	1.89489	2.41144	1.8949	0.321767
1.89563	2.4595	1.89571	2.02693	1.8955	2.19369	1.89568	2.4533	1.89545	4.70127	1.89539	2.41668	1.8954	0.322673
1.89613	2.46738	1.89622	2.03317	1.896	2.19806	1.89619	2.45992	1.89594	4.71092	1.89587	2.42219	1.89591	0.323531
1.89661	2.4756	1.89672	2.03893	1.89649	2.20287	1.89669	2.46677	1.89642	4.72283	1.89636	2.42744	1.89642	0.324251
1.89709	2.48136	1.8972	2.04263	1.89698	2.20737	1.89718	2.47406	1.89692	4.73635	1.89686	2.43303	1.89689	0.325087
1.8976	2.48585	1.89767	2.04618	1.89749	2.21339	1.89768	2.48183	1.89744	4.7497	1.89737	2.43962	1.89737	0.325986
1.8981	2.49077	1.8982	2.05041	1.89796	2.2192	1.89818	2.48839	1.89797	4.75834	1.89787	2.44459	1.8979	0.326961
1.89859	2.49495	1.89872	2.05464	1.89845	2.22348	1.89869	2.49511	1.89846	4.76459	1.89837	2.44857	1.89845	0.328052
1.89911	2.49954	1.89923	2.05849	1.89898	2.22758	1.89922	2.50097	1.89893	4.77295	1.89888	2.45406	1.89896	0.329054
1.89962	2.50673	1.89973	2.06365	1.89948	2.23201	1.89975	2.50776	1.89944	4.78509	1.89938	2.45985	1.89943	0.3298
1.90012	2.51455	1.9002	2.06896	1.89998	2.23698	1.90024	2.51512	1.89996	4.79318	1.89988	2.46624	1.89995	0.330654
1.90062	2.52267	1.90068	2.07407	1.90049	2.24239	1.9007	2.52199	1.90043	4.79764	1.90036	2.47277	1.90044	0.331606
1.90111	2.53073	1.90117	2.07932	1.90098	2.2476	1.9012	2.52917	1.90091	4.80243	1.90087	2.47748	1.90091	0.332485
1.90159	2.53855	1.90166	2.08511	1.90148	2.25198	1.90172	2.53738	1.90146	4.8128	1.90136	2.48202	1.90141	0.33331
1.90209	2.54388	1.90217	2.08974	1.90199	2.25582	1.90221	2.54502	1.902	4.82275	1.90186	2.48715	1.90193	0.334122
1.90259	2.54781	1.90269	2.09516	1.9025	2.26044	1.90272	2.55074	1.90249	4.83028	1.90236	2.49208	1.90245	0.334901
1.9031	2.5522	1.90316	2.10101	1.903	2.26595	1.90321	2.5571	1.90299	4.84041	1.90288	2.49826	1.90295	0.335556
1.90361	2.55363	1.90365	2.10557	1.90349	2.27232	1.90371	2.56355	1.9035	4.85141	1.90338	2.50419	1.90345	0.336246
1.9041	2.55636	1.90418	2.10976	1.90401	2.27917	1.90423	2.57108	1.904	4.85773	1.90387	2.50823	1.90394	0.337247
1.9046	2.56375	1.90472	2.11624	1.90452	2.28432	1.90473	2.5787	1.90448	4.86177	1.90438	2.51264	1.90441	0.338614
1.9051	2.57317	1.90521	2.12176	1.90502	2.28815	1.9052	2.58612	1.90496	4.8657	1.90488	2.51858	1.90491	0.339937
1.90559	2.58216	1.90568	2.12818	1.90552	2.29226	1.90569	2.59325	1.90547	4.87095	1.90536	2.52495	1.90543	0.341227
1.90609	2.59031	1.90619	2.1342	1.90603	2.29734	1.90616	2.60077	1.90598	4.87945	1.90586	2.53227	1.90595	0.342644
1.90661	2.59864	1.90671	2.13947	1.90652	2.30218	1.90671	2.60814	1.90646	4.88663	1.90637	2.5376	1.90644	0.344027
1.90713	2.60544	1.90721	2.14488	1.90701	2.30826	1.90725	2.61609	1.90695	4.89174	1.90688	2.54102	1.90689	0.345381
1.90765	2.61123	1.90771	2.1502	1.90752	2.31388	1.90777	2.62365	1.90747	4.89916	1.90739	2.54536	1.90738	0.346627
1.90816	2.61729	1.90821	2.15513	1.90802	2.3186	1.90825	2.63025	1.90798	4.90734	1.90789	2.55053	1.9079	0.347788
1.90866	2.61969	1.90871	2.16075	1.90852	2.32389	1.90868	2.63759	1.90849	4.91317	1.90837	2.55662	1.90839	0.348832
1.90916	2.62116	1.9092	2.16586	1.90901	2.32932	1.90916	2.64351	1.90895	4.91793	1.90888	2.56411	1.90888	0.34966
1.90965	2.62662	1.90968	2.17149	1.90949	2.33565	1.90972	2.64972	1.90942	4.92277	1.9094	2.56959	1.90939	0.350239
1.91014	2.63456	1.91018	2.17723	1.90999	2.3428	1.91023	2.65722	1.90992	4.93076	1.90991	2.5745	1.90992	0.350619
1.91063	2.64169	1.91071	2.1826	1.9105	2.34764	1.91073	2.6663	1.91044	4.93772	1.91039	2.58025	1.91044	0.35094
1.91111	2.64859	1.91121	2.1876	1.91098	2.35222	1.91122	2.67322	1.91095	4.93974	1.9109	2.58594	1.91094	0.351345
1.91159	2.65589	1.9117	2.19342	1.91148	2.35693	1.91171	2.67861	1.91144	4.94181	1.9114	2.59293	1.91145	0.351881
1.91209	2.66389	1.91217	2.19885	1.912	2.36156	1.91223	2.68486	1.9119	4.94545	1.91191	2.59946	1.91193	0.352551
1.91262	2.66866	1.91263	2.20388	1.9125	2.36555	1.91276	2.69303	1.91243	4.95019	1.9124	2.60527	1.91242	0.353256
1.91312	2.67188	1.91312	2.20855	1.91298	2.37073	1.91324	2.70122	1.91294	4.95505	1.9129	2.61183	1.91297	0.353999
1.91361	2.67356	1.91363	2.21347	1.91347	2.37661	1.91369	2.70785	1.91344	4.96039	1.9134	2.61707	1.91347	0.35479
1.91411	2.67368	1.91418	2.21867	1.91397	2.38181	1.91421	2.71504	1.91394	4.96329	1.9139	2.62276	1.91394	0.355718
1.9146	2.67809	1.91471	2.22517	1.91448	2.38705	1.9147	2.72369	1.91444	4.96581	1.91439	2.62914	1.91441	0.356894
1.9151	2.68732	1.91522	2.23118	1.91501	2.39204	1.91523	2.73226	1.91495	4.97077	1.91491	2.63303	1.91491	0.358029
1.91561	2.69774	1.91567	2.23753	1.9155	2.39744	1.91576	2.7387	1.91542	4.97716	1.91542	2.63632	1.91543	0.359188
1.91613	2.7065	1.91613	2.24284	1.916	2.40401	1.91625	2.74518	1.9159	4.98347	1.91591	2.64094	1.91593	0.360259
1.91663	2.71428	1.91665	2.24774	1.91653	2.40903	1.91671	2.75209	1.91642	4.99031	1.91639	2.64664	1.91646	0.361333
1.91712	2.72152	1.9172	2.25443	1.91702	2.41286	1.91718	2.75988	1.91694	4.99508	1.91687	2.65295	1.91695	0.362308
1.91762	2.72821	1.91773	2.25966	1.91752	2.41795	1.91772	2.76685	1.91745	5.00378	1.91738	2.65972	1.91743	0.363327
1.91811	2.73219	1.91819	2.26402	1.91801	2.42324	1.91827	2.77298	1.91796	5.01519	1.91789	2.66418	1.91791	0.364516
1.91861	2.7333	1.91869	2.26872	1.9185	2.42812	1.91877	2.77946	1.91844	5.02405	1.91838	2.66865	1.91842	0.365514
1.91911	2.735	1.91918	2.27382	1.91898	2.43416	1.91925	2.78784	1.91893	5.02981	1.91888	2.67415	1.91893	0.36629
1.91962	2.74077	1.9197	2.28117	1.91948	2.43906	1.91973	2.79589	1.91945	5.03638	1.91937	2.6799	1.91942	0.36716
1.92012	2.75033	1.92021	2.28793	1.91999	2.4432	1.92025	2.8031	1.91996	5.0413	1.91989	2.68705	1.91989	0.368231
1.92061	2.75987	1.92073	2.29376	1.92049	2.44728	1.92072	2.81047	1.92046	5.04539	1.92041	2.69354	1.92038	0.369502
1.92111	2.76719	1.92123	2.29958	1.921	2.45204	1.92121	2.81757	1.92093	5.05145	1.92093	2.6983	1.92092	0.37093
1.92162	2.77379	1.92169	2.30578	1.9215	2.45589	1.92174	2.82479	1.92142	5.05618	1.92142	2.70352	1.92146	0.37245
1.92213	2.78173	1.92215	2.31057	1.922	2.46038	1.92225	2.83037	1.92193	5.06091	1.9219	2.70889	1.92195	0.373822
1.92265	2.78952	1.92268	2.31613	1.92251	2.4662	1.92273	2.83618	1.9224	5.07067	1.92238	2.71536	1.92242	0.375309
1.92316	2.79471	1.92321	2.32121	1.92301	2.47117	1.92325	2.84512	1.92288	5.079	1.92285	2.7223	1.9229	0.376712
1.92365	2.79679	1.92371	2.32593	1.9235	2.47481	1.92376	2.85506	1.92343	5.0858	1.92337	2.72711	1.92339	0.37798
1.92416	2.79958	1.92419	2.33078	1.92399	2.47919	1.92426	2.86115	1.92396	5.09083	1.9239	2.73153	1.92389	0.37917
1.92467	2.80564	1.92469	2.33543	1.92449	2.48415	1.92476	2.86643	1.92444	5.09682	1.9244	2.737	1.92443	0.380337
1.92515	2.81352	1.9252	2.34189	1.92501	2.4887	1.92523	2.87289	1.92492	5.10328	1.92489	2.74365	1.92495	0.381118
1.92564	2.82201	1.9257	2.34978	1.9255	2.4953	1.92574	2.88049	1.92541	5.10751	1.92537	2.75158	1.92544	0.381665
1.92615	2.82886	1.92619	2.35492	1.92602	2.50081	1.92625	2.8884	1.92589	5.11358	1.92588	2.75727	1.92595	0.382206
1.92666	2.83649	1.92667	2.35897	1.9265	2.505	1.92673	2.8956	1.92641	5.11924	1.92639	2.76143	1.92645	0.382731
1.92716	2.84595	1.92715	2.36367	1.92698	2.50942	1.92723	2.90205	1.92694	5.1226	1.92687	2.76575	1.92692	0.38338
1.92766	2.85345	1.92765	2.3685	1.9275	2.51486	1.92774	2.90903	1.92744	5.10771	1.92739	2.7719	1.92742	0.384359
1.92816	2.85673	1.92819	2.37281	1.928	2.52132	1.92823	2.91765	1.92794	5.09427	1.92791	2.78011	1.92791	0.385463
1.92864	2.85714	1.9287	2.37854	1.9285	2.52832	1.92872	2.92443	1.92842	5.0935	1.92843	2.787	1.92841	0.386597
1.92913	2.85695	1.92915	2.38357	1.92898	2.53397	1.9292	2.9306	1.92891	5.10148	1.92893	2.79166	1.92889	0.387862
1.92963	2.86011	1.92965	2.38688	1.92948	2.53839	1.92967	2.93736	1.92941	5.10967	1.92942	2.79688	1.92937	0.388973
1.93014	2.86733	1.93017	2.39135	1.92997	2.54349	1.93014	2.94487	1.9299	5.11935	1.92993	2.80246	1.92985	0.390122
1.93065	2.87654	1.93068	2.3978	1.93047	2.54867	1.93065	2.95214	1.93039	5.12971	1.93043	2.80788	1.93037	0.391228
1.93114	2.8854	1.93118	2.40472	1.93099	2.55444	1.93115	2.95889	1.93088	5.13619	1.93093	2.81441	1.93089	0.392339
1.93161	2.89241	1.93167	2.41207	1.9315	2.56153	1.93169	2.96586	1.93141	5.14263	1.93143	2.81926	1.93139	0.393434
1.93211	2.89905	1.93219	2.41707	1.932	2.56671	1.93221	2.97341	1.93195	5.15015	1.93193	2.8223	1.93187	0.394602
1.93261	2.90547	1.93271	2.42089	1.93249	2.57174	1.93267	2.98149	1.93244	5.15691	1.93244	2.82668	1.93237	0.395905
1.9331	2.91189	1.93321	2.42561	1.93299	2.57771	1.93314	2.98819	1.93293	5.16359	1.93296	2.83423	1.9329	0.396951
1.93359	2.91432	1.93368	2.43072	1.9335	2.58395	1.93364	2.99471	1.93342	5.16918	1.93344	2.84368	1.93343	0.397936
1.9341	2.91556	1.93416	2.43498	1.93399	2.59076	1.93414	3.00185	1.93391	5.12715	1.93392	2.85007	1.93392	0.399105
1.9346	2.92013	1.93467	2.43695	1.93449	2.59604	1.93464	3.01029	1.93445	5.07559	1.93441	2.85303	1.93441	0.400485
1.9351	2.92822	1.93516	2.44205	1.93498	2.59992	1.93515	3.01808	1.93495	5.05904	1.93491	2.85657	1.93487	0.401759
1.93558	2.9366	1.93566	2.44771	1.93549	2.60548	1.93567	3.02557	1.93541	5.06496	1.9354	2.86186	1.93539	0.402929
1.9361	2.9447	1.93616	2.45369	1.936	2.61023	1.9362	3.03286	1.9359	5.07996	1.9359	2.8682	1.9359	0.404651
1.93663	2.95205	1.93668	2.45988	1.93651	2.61356	1.9367	3.04099	1.93643	5.09911	1.93642	2.87603	1.9364	0.406737
1.93713	2.95859	1.93718	2.4652	1.93702	2.6179	1.93718	3.04819	1.93694	5.11275	1.93691	2.88194	1.93691	0.408678
1.93762	2.96419	1.93766	2.47102	1.93752	2.62333	1.93766	3.05497	1.93746	5.1173	1.93738	2.88613	1.93742	0.410171
1.93811	2.96871	1.93815	2.47672	1.938	2.62749	1.93815	3.06172	1.93796	5.11642	1.93786	2.89079	1.93794	0.411179
1.93862	2.96679	1.93866	2.48211	1.9385	2.63036	1.93863	3.06863	1.93846	5.11119	1.93838	2.89633	1.93842	0.411984
1.93913	2.96427	1.93919	2.48765	1.93902	2.63436	1.93916	3.07629	1.93896	5.10941	1.93889	2.90331	1.93891	0.412654
1.93962	2.96991	1.9397	2.4933	1.93953	2.63911	1.93968	3.08382	1.93945	5.11656	1.93938	2.91033	1.93941	0.413202
1.94011	2.98035	1.94014	2.5003	1.94002	2.64666	1.94017	3.09119	1.93996	5.12811	1.93989	2.91543	1.93993	0.413735
1.94061	2.99007	1.94062	2.50744	1.94049	2.65512	1.94068	3.09925	1.94045	5.13507	1.94041	2.92039	1.94045	0.41439
1.9411	2.99924	1.94113	2.51226	1.941	2.65982	1.94117	3.10765	1.94095	5.13786	1.94091	2.92578	1.94095	0.415215
1.94161	3.00778	1.94167	2.51692	1.9415	2.66239	1.94166	3.11481	1.94143	5.13806	1.9414	2.93119	1.94143	0.416226
1.9421	3.01499	1.94216	2.52169	1.942	2.66702	1.94218	3.12191	1.94195	5.14139	1.94188	2.93755	1.94191	0.41745
1.9426	3.02052	1.94266	2.5265	1.9425	2.67275	1.94272	3.12982	1.94248	5.14562	1.94238	2.94335	1.9424	0.418883
1.94309	3.02488	1.94311	2.53291	1.943	2.67876	1.94322	3.13771	1.94295	5.14425	1.94287	2.94832	1.9429	0.420375
1.94358	3.02558	1.94358	2.5395	1.9435	2.68522	1.9437	3.14356	1.94341	5.14208	1.94338	2.95408	1.94339	0.421789
1.94409	3.02651	1.94415	2.54449	1.94399	2.69079	1.94422	3.1497	1.94392	5.14663	1.94388	2.96034	1.9439	0.423212
1.9446	3.03334	1.94469	2.54886	1.9445	2.6962	1.94475	3.1568	1.94441	5.15414	1.94438	2.96771	1.94439	0.424729
1.94511	3.04352	1.9452	2.55449	1.94502	2.70257	1.9452	3.1655	1.94493	5.16643	1.94487	2.97436	1.94486	0.426012
1.94561	3.0535	1.94571	2.56153	1.94553	2.70921	1.94568	3.17307	1.94544	5.17882	1.94537	2.97945	1.94536	0.427202
1.94609	3.06375	1.9462	2.56822	1.94603	2.71542	1.94617	3.17949	1.94594	5.18677	1.94587	2.98453	1.94591	0.428249
1.9466	3.07178	1.94672	2.5728	1.94649	2.72011	1.94668	3.18622	1.94644	5.19368	1.94638	2.99009	1.94643	0.429222
1.94711	3.07803	1.94722	2.57684	1.94698	2.72393	1.94719	3.19395	1.94692	5.20378	1.94689	2.99668	1.94696	0.430276
1.94761	3.08366	1.9477	2.58125	1.94749	2.72796	1.94773	3.20177	1.9474	5.21352	1.94741	3.00369	1.94746	0.431505
1.94811	3.08863	1.94821	2.5863	1.94801	2.7327	1.94823	3.20968	1.9479	5.21942	1.94791	3.00909	1.94792	0.432957
1.9486	3.08948	1.94868	2.59135	1.94852	2.73782	1.94875	3.21821	1.94839	5.22603	1.94841	3.01442	1.94841	0.434791
1.94911	3.08936	1.94918	2.59807	1.94902	2.74435	1.94923	3.22676	1.94887	5.23559	1.9489	3.01995	1.94893	0.436479
1.94959	3.095	1.9497	2.60385	1.9495	2.75045	1.94971	3.23478	1.94939	5.24876	1.94941	3.02606	1.94942	0.438222
1.95008	3.10517	1.9502	2.60906	1.95	2.75475	1.95015	3.24226	1.94994	5.26314	1.9499	3.03339	1.94994	0.439731
1.95058	3.11626	1.9507	2.61642	1.95053	2.75904	1.95062	3.24948	1.95046	5.27538	1.95039	3.03882	1.95043	0.441187
1.95109	3.12635	1.95116	2.62335	1.95104	2.764	1.95113	3.25689	1.95096	5.28926	1.9509	3.04363	1.95091	0.442513
1.95159	3.13426	1.95171	2.63074	1.95153	2.77093	1.95165	3.26437	1.95144	5.30119	1.95141	3.0493	1.95141	0.443523
1.95209	3.14016	1.95223	2.63631	1.95203	2.77848	1.95218	3.27105	1.95191	5.31108	1.95191	3.05415	1.95189	0.444219
1.95261	3.14578	1.95268	2.64197	1.95255	2.78346	1.9527	3.2777	1.95239	5.31786	1.95238	3.0587	1.9524	0.444788
1.95312	3.15047	1.95315	2.64715	1.95306	2.78783	1.95318	3.28553	1.95291	5.32687	1.95287	3.06476	1.95293	0.445343
1.95361	3.14978	1.95366	2.65218	1.95355	2.79368	1.95369	3.29407	1.95343	5.33497	1.95335	3.06939	1.95343	0.446057
1.95412	3.14969	1.95418	2.65838	1.95406	2.79883	1.9542	3.30163	1.95394	5.33936	1.95388	3.0728	1.95391	0.447084
1.95461	3.15529	1.95469	2.66056	1.95454	2.80263	1.95467	3.30928	1.95444	5.33933	1.95439	3.07723	1.9544	0.448339
1.95509	3.165	1.95522	2.66441	1.95504	2.80718	1.95519	3.31667	1.95493	5.33975	1.95489	3.08263	1.95492	0.449706
1.95559	3.17657	1.9557	2.66993	1.95556	2.81209	1.95572	3.32415	1.95545	5.34607	1.95538	3.08836	1.95543	0.451112
1.9561	3.18787	1.95621	2.67688	1.95606	2.81622	1.95618	3.33096	1.95593	5.35905	1.95589	3.09507	1.95594	0.452559
1.9566	3.19666	1.95674	2.68349	1.95655	2.82076	1.95664	3.33769	1.95643	5.37409	1.95638	3.10069	1.95641	0.454078
1.9571	3.20256	1.95724	2.68962	1.95704	2.82743	1.95714	3.34467	1.95692	5.38318	1.95688	3.10544	1.9569	0.455487
1.9576	3.20757	1.95771	2.69466	1.95753	2.83574	1.95768	3.35303	1.95743	5.38909	1.95741	3.11031	1.95741	0.456773
1.95808	3.21222	1.9582	2.69859	1.95802	2.8433	1.95819	3.36026	1.95795	5.40027	1.95789	3.11589	1.95789	0.458043
1.95857	3.21274	1.95871	2.70312	1.95852	2.84725	1.95867	3.36746	1.95841	5.41508	1.95837	3.12256	1.95836	0.459178
1.95907	3.21468	1.95918	2.70771	1.95902	2.84974	1.95919	3.37562	1.95892	5.42833	1.95887	3.12947	1.9589	0.460302
1.95958	3.22202	1.95966	2.71391	1.95951	2.85467	1.95968	3.38426	1.95944	5.43881	1.95939	3.13432	1.95943	0.461507
1.96007	3.23204	1.96016	2.72257	1.96	2.86072	1.96019	3.39234	1.95996	5.4473	1.95989	3.13936	1.95992	0.462981
1.96057	3.24187	1.96066	2.73031	1.96049	2.86609	1.96068	3.39987	1.96042	5.45538	1.96037	3.1456	1.96041	0.464979
1.96106	3.25108	1.96118	2.73751	1.96099	2.87216	1.96119	3.4072	1.9609	5.46382	1.96088	3.15275	1.96089	0.467324
1.96156	3.25984	1.96169	2.74375	1.96148	2.87819	1.96171	3.41476	1.96139	5.47189	1.96139	3.15995	1.9614	0.469492
1.96206	3.2661	1.96217	2.74867	1.96199	2.88407	1.9622	3.42162	1.96188	5.4794	1.96186	3.16526	1.96191	0.471168
1.96256	3.2707	1.96266	2.75385	1.96249	2.88964	1.9627	3.42785	1.96237	5.48954	1.96235	3.1697	1.9624	0.472644
1.96307	3.27398	1.96315	2.75897	1.96299	2.89554	1.9632	3.43482	1.96287	5.49743	1.96285	3.17478	1.9629	0.473948
1.96356	3.27567	1.96365	2.76353	1.96347	2.90228	1.96365	3.4427	1.96339	5.50214	1.96337	3.181	1.96339	0.474909
1.96406	3.27935	1.9642	2.76792	1.96398	2.90809	1.96416	3.45112	1.96392	5.50593	1.96388	3.18847	1.9639	0.475591
1.96458	3.28764	1.96469	2.77162	1.96447	2.91275	1.9647	3.45904	1.96441	5.50679	1.96438	3.19428	1.9644	0.476211
1.96509	3.29756	1.96519	2.77626	1.96496	2.91769	1.9652	3.46669	1.96491	5.50772	1.96487	3.1988	1.9649	0.477014
1.96559	3.30805	1.9657	2.7848	1.96546	2.92307	1.96571	3.47382	1.96542	5.50911	1.96538	3.20422	1.96539	0.477928
1.96609	3.31718	1.96622	2.79289	1.96596	2.92849	1.9662	3.4816	1.96591	5.51012	1.96587	3.21064	1.96591	0.479111
1.96656	3.32536	1.96675	2.80049	1.96647	2.93506	1.96668	3.48777	1.9664	5.51205	1.96635	3.21768	1.96641	0.480562
1.96706	3.33337	1.96726	2.80584	1.96699	2.94131	1.96719	3.49397	1.9669	5.51559	1.96688	3.22389	1.96691	0.481886
1.96758	3.33974	1.96777	2.80955	1.96749	2.94724	1.96769	3.50027	1.96741	5.52164	1.96738	3.22838	1.9674	0.483
1.9681	3.3449	1.96828	2.81513	1.96798	2.95327	1.9682	3.50638	1.96793	5.53211	1.96786	3.23345	1.96791	0.484458
1.9686	3.34473	1.96876	2.82188	1.9685	2.9596	1.96873	3.51332	1.96844	5.54426	1.96838	3.23961	1.96842	0.486325
1.96911	3.34103	1.96921	2.82828	1.96899	2.96607	1.96925	3.52049	1.96892	5.55344	1.96889	3.24637	1.96891	0.487899
1.96961	3.34283	1.96973	2.83416	1.9695	2.97185	1.96971	3.52891	1.9694	5.56005	1.96938	3.25351	1.96941	0.489143
1.97009	3.35168	1.97022	2.83976	1.96999	2.97735	1.97017	3.53778	1.96992	5.56343	1.96987	3.25923	1.96991	0.490262
1.97059	3.36268	1.97072	2.84786	1.97049	2.98368	1.97064	3.54543	1.97044	5.56742	1.97037	3.26508	1.97041	0.491354
1.97108	3.37294	1.97125	2.85373	1.971	2.99109	1.97114	3.55157	1.97093	5.57295	1.9709	3.27096	1.97089	0.492466
1.97159	3.38002	1.97178	2.85637	1.97151	2.9979	1.97167	3.55871	1.97144	5.57532	1.9714	3.27761	1.97136	0.493762
1.97209	3.38584	1.97226	2.8593	1.97199	3.00348	1.97219	3.5666	1.97194	5.57663	1.97189	3.28454	1.97187	0.495677
1.97258	3.39104	1.97274	2.86378	1.97247	3.00899	1.97269	3.57549	1.97244	5.58125	1.97237	3.28908	1.97239	0.498031
1.97308	3.39613	1.97323	2.86799	1.97298	3.01489	1.97319	3.58338	1.97294	5.59249	1.97288	3.2932	1.97288	0.500273
1.97358	3.39961	1.9737	2.87385	1.9735	3.0211	1.97368	3.59164	1.97344	5.60331	1.97339	3.29878	1.97341	0.502184
1.97409	3.40343	1.97421	2.88241	1.97402	3.02835	1.97417	3.60143	1.97393	5.61317	1.97387	3.30483	1.9739	0.503731
1.9746	3.41094	1.97474	2.89153	1.97452	3.0345	1.97467	3.60989	1.97444	5.62295	1.97439	3.31236	1.97439	0.504987
1.9751	3.42019	1.97521	2.89837	1.97501	3.04071	1.97516	3.61697	1.97494	5.63367	1.9749	3.31915	1.97487	0.506043
1.97558	3.43016	1.97565	2.90596	1.97549	3.04737	1.97567	3.62359	1.97542	5.64144	1.9754	3.32458	1.97539	0.506878
1.97609	3.43922	1.97614	2.91367	1.97598	3.05303	1.97616	3.63134	1.97593	5.64626	1.97588	3.33033	1.9759	0.507532
1.9766	3.44683	1.97666	2.9181	1.97649	3.05863	1.97666	3.63916	1.97643	5.6485	1.97639	3.33543	1.97635	0.508249
1.9771	3.45319	1.97718	2.92007	1.97699	3.06401	1.97717	3.64591	1.97692	5.65031	1.97688	3.34224	1.97688	0.509272
1.97759	3.45997	1.97767	2.92332	1.97749	3.06953	1.9777	3.65323	1.97741	5.65357	1.97739	3.34867	1.97739	0.510457
1.97809	3.46564	1.97816	2.92878	1.97798	3.07538	1.97819	3.66106	1.97792	5.66254	1.97787	3.35309	1.97789	0.512
1.97858	3.4666	1.97868	2.93423	1.9785	3.08101	1.97867	3.66946	1.97843	5.6725	1.97836	3.35824	1.97839	0.513519
1.97908	3.46329	1.97919	2.93987	1.97899	3.08616	1.9792	3.67785	1.97893	5.67859	1.97885	3.36427	1.9789	0.515145
1.9796	3.46605	1.97967	2.945	1.97948	3.0916	1.97971	3.6863	1.97943	5.68295	1.97935	3.37112	1.97938	0.516721
1.98011	3.47505	1.98019	2.95147	1.97999	3.09668	1.98018	3.69503	1.9799	5.6892	1.97988	3.37848	1.97988	0.51835
1.98061	3.48561	1.98068	2.9592	1.9805	3.10195	1.98067	3.70266	1.9804	5.69847	1.98039	3.38416	1.98042	0.519933
1.98111	3.49716	1.98119	2.96555	1.98099	3.11783	1.98117	3.70979	1.98088	5.70706	1.98089	3.39053	1.98095	0.521386
1.98161	3.50784	1.98169	2.97245	1.98149	3.13583	1.98168	3.71759	1.9814	5.71071	1.98138	3.39717	1.98143	0.522535
1.98211	3.515	1.98218	2.97801	1.982	3.14687	1.9822	3.72588	1.98192	5.71047	1.98187	3.40417	1.98191	0.523739
1.98261	3.52043	1.98268	2.98234	1.98249	3.15378	1.98267	3.73388	1.98243	5.7199	1.98238	3.41064	1.98245	0.525292
1.9831	3.52523	1.9832	2.98705	1.98298	3.1577	1.98317	3.7414	1.98291	5.73024	1.98288	3.41561	1.98295	0.527124
1.98362	3.52626	1.98371	2.99316	1.98346	3.15987	1.98369	3.74904	1.98342	5.73915	1.9834	3.42102	1.98343	0.529131
1.9841	3.5271	1.98419	2.99986	1.98399	3.16358	1.98421	3.75761	1.98392	5.74413	1.98392	3.42708	1.98393	0.531404
1.9846	3.53405	1.9847	3.00502	1.98451	3.16919	1.98472	3.76599	1.98442	5.74619	1.9844	3.43428	1.98442	0.533625
1.9851	3.54445	1.98524	3.01038	1.98501	3.1754	1.98521	3.77369	1.98493	5.74443	1.9849	3.44149	1.98494	0.535543
1.98561	3.55544	1.98573	3.01725	1.98549	3.18272	1.98572	3.78161	1.98544	5.73944	1.98539	3.44648	1.98543	0.536819
1.98611	3.56581	1.9862	3.02337	1.98601	3.19035	1.98623	3.79076	1.98595	5.73912	1.98589	3.45129	1.98591	0.53771
1.9866	3.57403	1.98666	3.02842	1.98652	3.19888	1.98672	3.79777	1.98644	5.74158	1.98638	3.45687	1.98641	0.538419
1.98711	3.58048	1.9872	3.03423	1.98701	3.20511	1.98722	3.80271	1.98694	5.74391	1.9869	3.46186	1.98693	0.53914
1.9876	3.58655	1.98773	3.03995	1.98751	3.20929	1.98771	3.80836	1.98742	5.74834	1.98742	3.4676	1.98746	0.540089
1.98809	3.59349	1.98821	3.046	1.98801	3.2146	1.98821	3.81549	1.98792	5.75106	1.98793	3.47385	1.98794	0.541372
1.98862	3.59507	1.98869	3.05183	1.98851	3.22047	1.98867	3.8194	1.98846	5.75903	1.98841	3.47957	1.98842	0.542855
1.98914	3.59161	1.9892	3.05702	1.98902	3.22596	1.98917	3.82613	1.98898	5.77501	1.98892	3.48618	1.98891	0.544435
1.98963	3.5941	1.98971	3.06325	1.98952	3.23079	1.9897	3.83461	1.98945	5.79089	1.9894	3.49325	1.98939	0.546156
1.99013	3.60256	1.99021	3.07032	1.99001	3.23623	1.99021	3.84491	1.98993	5.79751	1.98987	3.50147	1.9899	0.547924
1.99063	3.61272	1.99072	3.07741	1.9905	3.24201	1.99068	3.85528	1.99043	5.79388	1.99037	3.50764	1.99043	0.549609
1.99112	3.62307	1.99123	3.0835	1.991	3.24794	1.99117	3.86266	1.99096	5.79372	1.99086	3.51312	1.99095	0.551105
1.99162	3.63151	1.99174	3.08838	1.99149	3.25333	1.99167	3.8702	1.99145	5.79078	1.99136	3.51887	1.99138	0.552636
1.99213	3.63795	1.99223	3.09307	1.99198	3.25858	1.99219	3.87827	1.99194	5.80014	1.99189	3.52441	1.99185	0.554154
1.99262	3.64337	1.99273	3.0986	1.99249	3.26446	1.99269	3.88705	1.99246	5.81861	1.9924	3.53159	1.99238	0.555972
1.99311	3.64858	1.99318	3.10491	1.993	3.2706	1.99317	3.89443	1.99296	5.83346	1.99289	3.53751	1.99291	0.558
1.99361	3.6492	1.99365	3.11167	1.99351	3.27757	1.99368	3.90211	1.99344	5.84633	1.9934	3.54228	1.99342	0.560209
1.99413	3.65088	1.99414	3.11886	1.99401	3.28291	1.99418	3.91075	1.99392	5.85612	1.9939	3.54821	1.99388	0.562201
1.99463	3.65821	1.99464	3.12504	1.99452	3.28635	1.99472	3.9196	1.99443	5.8651	1.99438	3.55554	1.99437	0.564142
1.99513	3.66877	1.99514	3.1313	1.995	3.29125	1.99522	3.92709	1.99495	5.87875	1.99487	3.56385	1.99487	0.565999
1.99562	3.67889	1.9957	3.13769	1.99548	3.29665	1.9957	3.93425	1.99546	5.89443	1.99538	3.56974	1.9954	0.567507
1.99611	3.68736	1.99623	3.14591	1.99598	3.3023	1.99621	3.94142	1.99595	5.90435	1.99591	3.57447	1.99595	0.568698
1.9966	3.69542	1.99675	3.15328	1.9965	3.30858	1.9967	3.94976	1.99644	5.91901	1.99641	3.57989	1.99644	0.569664
1.9971	3.70371	1.99723	3.16104	1.997	3.31444	1.99715	3.95744	1.99693	5.94671	1.99687	3.58549	1.99694	0.570551
1.99761	3.7115	1.99773	3.16687	1.9975	3.3204	1.99763	3.96528	1.99742	5.98153	1.99736	3.59235	1.99742	0.571575
1.9981	3.71772	1.99818	3.17026	1.99798	3.32655	1.99816	3.9728	1.99791	6.00542	1.99788	3.59888	1.9979	0.572854
1.99848	3.7194	1.99848	3.17219	1.9984	3.33139	1.99855	3.97925	1.99841	6.02137	1.99839	3.60425	1.99839	0.574338

## Sheet: Figure_6(a)
Ir/C (Premetek)		Pt/C		Ganma-MnO2		No Catalyst
Potential / V vs. SHE	Current Density / mA cm^(-2)	Potential / V vs. SHE	Current Density / mA cm^(-2)	Potential / V vs. SHE	Current Density / mA cm^(-2)	Potential / V vs. SHE	Current Density / mA cm^(-2)
1.00002	0.0761432	1.00026	0.0639184	1.00003	0.116116	1.00015	0.0270073
1.0005	0.0748798	1.00075	0.0654904	1.00052	0.116404	1.00067	0.0272957
1.00101	0.0759943	1.00126	0.062692	1.00103	0.117128	1.00117	0.0271609
1.0015	0.0760308	1.00175	0.0649249	1.00151	0.117366	1.00167	0.027156
1.00201	0.0765465	1.00225	0.0627355	1.002	0.116721	1.00216	0.0273155
1.0025	0.0754982	1.00275	0.0650927	1.0025	0.117693	1.00267	0.0274517
1.00301	0.0765625	1.00326	0.0635689	1.00299	0.118692	1.00317	0.0273851
1.0035	0.0767074	1.00376	0.0659934	1.0035	0.118221	1.00366	0.0275043
1.00402	0.0771949	1.00426	0.0617315	1.00399	0.118139	1.00416	0.0275343
1.00451	0.076149	1.00476	0.0648066	1.00449	0.118799	1.00465	0.0276984
1.00502	0.0775396	1.00526	0.0646768	1.005	0.119552	1.00515	0.0276178
1.00552	0.0770845	1.00576	0.0666971	1.00551	0.119814	1.00566	0.0275632
1.00602	0.07832	1.00625	0.0648105	1.00599	0.118815	1.00614	0.0278177
1.00651	0.0773648	1.00677	0.0666361	1.00651	0.119893	1.00663	0.0279701
1.00702	0.0781142	1.00725	0.0644746	1.00702	0.120907	1.00714	0.0279509
1.00751	0.0778677	1.00777	0.0663801	1.00752	0.120707	1.00765	0.0279227
1.00802	0.0785531	1.00826	0.0645969	1.00802	0.120527	1.00814	0.0280784
1.00851	0.0774762	1.00876	0.0669986	1.00852	0.120939	1.00865	0.0282623
1.00902	0.0789271	1.00925	0.0663209	1.00902	0.121989	1.00916	0.0281063
1.00952	0.0786632	1.00976	0.0657719	1.00952	0.121839	1.00966	0.0280598
1.01002	0.0790804	1.01026	0.0658398	1.01002	0.12116	1.01016	0.0282548
1.01051	0.0780907	1.01076	0.0676364	1.0105	0.122084	1.01067	0.0284834
1.01102	0.0797048	1.01126	0.0660534	1.01099	0.123174	1.01118	0.028339
1.01153	0.0798318	1.01176	0.0680061	1.01151	0.122706	1.01168	0.0283806
1.01201	0.0798658	1.01225	0.0660173	1.012	0.122812	1.0122	0.0285046
1.01253	0.0791227	1.01277	0.0671474	1.01253	0.123105	1.01271	0.0287784
1.01302	0.0802325	1.01327	0.0671497	1.01304	0.124946	1.01322	0.0285963
1.01353	0.0802348	1.01377	0.0645339	1.01356	0.124025	1.01371	0.028543
1.01404	0.0807432	1.01426	0.067353	1.01404	0.123235	1.01419	0.0287476
1.01452	0.0796629	1.01476	0.0678529	1.01453	0.123929	1.01468	0.0288707
1.01503	0.0809181	1.01527	0.0682389	1.01505	0.125164	1.01519	0.0288285
1.01553	0.0810208	1.01577	0.067988	1.01557	0.12525	1.01569	0.0288544
1.01604	0.0814305	1.01626	0.0657028	1.01605	0.124406	1.01619	0.0290194
1.01652	0.080411	1.01676	0.0694893	1.01655	0.125379	1.0167	0.029141
1.01704	0.0819995	1.01728	0.0680144	1.01706	0.126726	1.01719	0.0291433
1.01753	0.0814184	1.01777	0.0698134	1.01756	0.126163	1.0177	0.0290451
1.01804	0.082139	1.01827	0.0680895	1.01806	0.125842	1.0182	0.02917
1.01852	0.0813502	1.01877	0.0684893	1.01855	0.126554	1.0187	0.0294268
1.01904	0.0824967	1.01927	0.0680023	1.01905	0.127479	1.01921	0.0292999
1.01953	0.0820522	1.01978	0.0702687	1.01955	0.12749	1.01971	0.0293504
1.02004	0.0827901	1.02028	0.0682614	1.02004	0.127402	1.02021	0.0294722
1.02052	0.0815414	1.02077	0.0705767	1.02053	0.128114	1.02071	0.0297208
1.02104	0.0833078	1.02128	0.0678235	1.02105	0.128973	1.02121	0.0295492
1.02154	0.0829887	1.02178	0.0703362	1.02155	0.128719	1.02172	0.0296401
1.02205	0.083762	1.02227	0.0693569	1.02204	0.127264	1.0222	0.0297039
1.02253	0.0826317	1.02277	0.0699848	1.02255	0.129101	1.0227	0.0298506
1.02304	0.0840208	1.02327	0.0706046	1.02306	0.130093	1.02319	0.0298483
1.02353	0.083835	1.02379	0.0712569	1.02355	0.129798	1.02369	0.0298482
1.02404	0.084491	1.02427	0.0697979	1.02405	0.129366	1.02418	0.0300362
1.02453	0.0832797	1.02478	0.0705763	1.02455	0.130454	1.02469	0.0302154
1.02504	0.0847459	1.02527	0.0719149	1.02506	0.131894	1.02519	0.0300573
1.02554	0.0845405	1.02579	0.0713955	1.02557	0.130982	1.02568	0.0301118
1.02604	0.0851013	1.02627	0.0693058	1.02606	0.130227	1.02619	0.0301823
1.02653	0.0843935	1.02678	0.0699143	1.02656	0.131004	1.0267	0.0305203
1.02704	0.0854013	1.02728	0.0706783	1.02706	0.132393	1.02721	0.0303298
1.02754	0.0854821	1.02779	0.0702029	1.02758	0.132169	1.02771	0.030448
1.02805	0.0863405	1.02828	0.0700876	1.02807	0.132452	1.02822	0.03053
1.02853	0.0847972	1.02878	0.0704844	1.02858	0.132958	1.02873	0.0309955
1.02901	0.0861878	1.02928	0.0732321	1.0291	0.135413	1.02924	0.0305498
1.02954	0.0869109	1.02979	0.0714012	1.02958	0.133877	1.02975	0.0305832
1.03005	0.0869675	1.03029	0.0709431	1.03008	0.132335	1.03024	0.0307572
1.03054	0.0855112	1.03078	0.071624	1.03057	0.133752	1.03073	0.0308834
1.03104	0.0875142	1.03128	0.0728241	1.03108	0.134654	1.03123	0.0308899
1.03154	0.087702	1.03179	0.0734761	1.03157	0.134574	1.03173	0.0309022
1.03205	0.0877335	1.03229	0.0721579	1.03206	0.134462	1.03222	0.0311651
1.03254	0.0869463	1.03278	0.0715233	1.03256	0.134789	1.03272	0.031138
1.03305	0.0877767	1.03329	0.072417	1.03307	0.135759	1.03321	0.0311519
1.03354	0.0875564	1.03378	0.0736516	1.03358	0.136003	1.03371	0.0311868
1.03405	0.08832	1.03428	0.0727826	1.03407	0.135083	1.03419	0.0313449
1.03453	0.0876689	1.03478	0.0727915	1.03458	0.136405	1.03471	0.0315471
1.03505	0.0887498	1.03529	0.073268	1.0351	0.137384	1.03522	0.0314313
1.03554	0.0888817	1.03579	0.0762664	1.03557	0.136692	1.03571	0.0315248
1.03605	0.0897155	1.03629	0.0745018	1.03607	0.13667	1.03621	0.0316458
1.03654	0.0880942	1.03679	0.0751419	1.03657	0.137852	1.03672	0.0318608
1.03705	0.0898314	1.03729	0.0742773	1.03709	0.1386	1.03723	0.0317496
1.03755	0.0900402	1.0378	0.0753356	1.03759	0.138551	1.03773	0.0316224
1.03806	0.0904734	1.0383	0.0727064	1.03808	0.1375	1.03822	0.0320208
1.03855	0.0892786	1.03879	0.0753432	1.03856	0.138628	1.03872	0.032038
1.03905	0.0905661	1.03929	0.0744255	1.03906	0.139571	1.03923	0.0319709
1.03955	0.0908147	1.03979	0.0754211	1.03956	0.139699	1.03973	0.0321092
1.04006	0.0908804	1.04028	0.0739587	1.04005	0.13935	1.04022	0.0322014
1.04054	0.0902808	1.04079	0.0771412	1.04054	0.139736	1.04071	0.0323127
1.04106	0.0914822	1.04129	0.0749196	1.04107	0.141645	1.04122	0.0322707
1.04155	0.0911371	1.0418	0.0747403	1.04157	0.140952	1.04172	0.0322927
1.04206	0.0920292	1.04228	0.0726621	1.04206	0.140027	1.04221	0.0324317
1.04255	0.0913774	1.04279	0.076848	1.04257	0.141038	1.0427	0.0326607
1.04305	0.0922777	1.04329	0.0767444	1.04309	0.142329	1.04322	0.0325812
1.04355	0.0921519	1.0438	0.0739463	1.04359	0.142136	1.04372	0.0326026
1.04406	0.0932192	1.04429	0.0759435	1.04407	0.142491	1.04421	0.0327358
1.04454	0.0920043	1.0448	0.0750587	1.04458	0.142576	1.04472	0.0329903
1.04506	0.0937517	1.0453	0.0751749	1.04511	0.144162	1.04524	0.0328999
1.04556	0.0935118	1.0458	0.0781662	1.04559	0.143459	1.04573	0.0328394
1.04604	0.0940529	1.04625	0.0752593	1.04603	0.142464	1.0462	0.0330445
1.04651	0.0931455	1.04675	0.0786389	1.04654	0.143894	1.0467	0.0331197
1.04703	0.0944125	1.04725	0.0777249	1.04704	0.144699	1.04721	0.0332081
1.04753	0.0942982	1.04776	0.0800768	1.04754	0.144881	1.0477	0.0332079
1.04803	0.0948034	1.04825	0.0774669	1.04803	0.144269	1.0482	0.0333645
1.04852	0.0944239	1.04875	0.0784619	1.04852	0.1446	1.04869	0.0335174
1.04902	0.0954013	1.04926	0.0776885	1.04904	0.146426	1.04918	0.0334585
1.04952	0.094715	1.04975	0.0787349	1.04954	0.146214	1.0497	0.0334728
1.05003	0.0956626	1.05025	0.0778689	1.05003	0.145677	1.05018	0.0336069
1.05051	0.0949257	1.05075	0.0794869	1.05053	0.146264	1.05068	0.0337741
1.05102	0.096208	1.05126	0.0766619	1.05104	0.147608	1.05117	0.0338058
1.05152	0.0962716	1.05176	0.0801638	1.05156	0.147267	1.05167	0.0338393
1.05203	0.0968164	1.05226	0.0777898	1.05206	0.147325	1.05219	0.0338602
1.0525	0.0961089	1.05276	0.0797829	1.05255	0.148134	1.05269	0.0340352
1.05303	0.097893	1.05327	0.0801744	1.05307	0.148933	1.0532	0.0341208
1.05353	0.097363	1.05377	0.0800454	1.05355	0.148798	1.0537	0.0341029
1.05403	0.0978837	1.05426	0.0779501	1.05405	0.147675	1.05419	0.034229
1.05451	0.0968163	1.05477	0.0796105	1.05454	0.149246	1.0547	0.0344682
1.05504	0.0980405	1.05527	0.0817036	1.05502	0.149814	1.0552	0.034348
1.05554	0.0984068	1.05577	0.0804167	1.05551	0.150255	1.0557	0.0343149
1.05605	0.0989357	1.05627	0.081511	1.05603	0.149927	1.05619	0.034489
1.05653	0.0983435	1.05676	0.0827087	1.05654	0.15101	1.05669	0.0347655
1.05704	0.098821	1.05726	0.0789278	1.05702	0.152027	1.05719	0.0347054
1.05753	0.0995136	1.05777	0.082046	1.0575	0.151812	1.05768	0.0346729
1.05803	0.0998622	1.05825	0.0792305	1.05804	0.151432	1.05817	0.0348955
1.05852	0.0986824	1.05876	0.0813801	1.05853	0.151998	1.05868	0.0349857
1.05903	0.100371	1.05926	0.0826195	1.05904	0.15337	1.05918	0.0349643
1.05952	0.10022	1.05978	0.082826	1.05956	0.153029	1.05968	0.0351153
1.06003	0.101201	1.06026	0.0817843	1.06006	0.153063	1.06018	0.0351505
1.06051	0.100362	1.06076	0.0830177	1.06057	0.153225	1.06069	0.03541
1.06103	0.101611	1.06127	0.0822637	1.06107	0.155486	1.0612	0.0353711
1.06152	0.101758	1.06178	0.0839626	1.06156	0.154839	1.06171	0.0352717
1.06204	0.102285	1.06226	0.0795345	1.06206	0.153213	1.0622	0.0355264
1.06252	0.101398	1.06277	0.0844773	1.06255	0.155117	1.06271	0.0356464
1.06301	0.103045	1.06327	0.0821359	1.06305	0.155971	1.06321	0.0357036
1.06353	0.102297	1.06378	0.0825259	1.06354	0.156113	1.06372	0.0356664
1.06404	0.103561	1.06426	0.0831567	1.06403	0.155261	1.06421	0.0358294
1.06452	0.102455	1.06477	0.083427	1.06453	0.156412	1.06471	0.0360278
1.06503	0.103724	1.06526	0.0850632	1.06504	0.158034	1.06521	0.0359743
1.06553	0.103553	1.06576	0.0848915	1.06553	0.157522	1.0657	0.0358764
1.06604	0.104457	1.06626	0.0825306	1.06601	0.156384	1.06619	0.0361136
1.06652	0.103574	1.06676	0.0846796	1.06652	0.157773	1.06668	0.0362362
1.06704	0.105059	1.06726	0.085222	1.06705	0.159044	1.06718	0.0363132
1.06753	0.104891	1.06776	0.0855486	1.06755	0.158565	1.06769	0.0363341
1.06804	0.105703	1.06827	0.0849036	1.06804	0.158562	1.06818	0.0365248
1.06852	0.104223	1.06876	0.08763	1.06855	0.159034	1.06868	0.0366366
1.06904	0.106496	1.06927	0.0858614	1.06906	0.160102	1.06919	0.0366116
1.06953	0.106115	1.06977	0.0875262	1.06956	0.159783	1.06969	0.0366057
1.07004	0.106616	1.07027	0.0830003	1.07004	0.159125	1.07019	0.036852
1.07052	0.106141	1.07077	0.0882681	1.07052	0.160837	1.0707	0.0369511
1.07103	0.107458	1.07127	0.0853768	1.07103	0.162063	1.07121	0.0369291
1.07153	0.107201	1.07178	0.0848896	1.07153	0.161578	1.07171	0.0369711
1.07205	0.107736	1.07228	0.0865087	1.07203	0.161479	1.07221	0.0372294
1.07253	0.107169	1.07277	0.0877691	1.07252	0.161845	1.07271	0.0373529
1.07304	0.108395	1.07327	0.0885586	1.07302	0.16389	1.07322	0.0373213
1.07353	0.108333	1.07377	0.0892156	1.07353	0.163049	1.07371	0.0372801
1.07406	0.109551	1.07427	0.0865605	1.07401	0.162309	1.0742	0.0374807
1.07453	0.107921	1.07477	0.0875964	1.07451	0.163908	1.07469	0.0377072
1.07504	0.109747	1.07527	0.0874536	1.07503	0.165179	1.0752	0.0376594
1.07555	0.109735	1.07578	0.0896424	1.07554	0.164323	1.0757	0.0377106
1.07606	0.110219	1.07627	0.0865869	1.07605	0.164916	1.07618	0.0377926
1.07654	0.109083	1.07678	0.0893774	1.07653	0.165204	1.07668	0.0380664
1.07705	0.110706	1.07727	0.0892979	1.07707	0.167157	1.0772	0.0380948
1.07754	0.110865	1.07778	0.0895238	1.07756	0.166491	1.07771	0.037914
1.07805	0.11201	1.07827	0.087497	1.07805	0.165253	1.07818	0.0381875
1.07853	0.110673	1.07878	0.0909556	1.07853	0.166551	1.0787	0.0382962
1.07905	0.112175	1.07928	0.08922	1.07907	0.167417	1.07922	0.0383844
1.07955	0.112302	1.07979	0.0903388	1.07954	0.167611	1.07972	0.0383207
1.08003	0.113351	1.08027	0.0890954	1.08002	0.167319	1.08021	0.0385789
1.08054	0.111951	1.08078	0.0894757	1.08052	0.167864	1.08071	0.0388323
1.08105	0.113161	1.08128	0.0893503	1.08103	0.169994	1.08122	0.0386713
1.08154	0.11368	1.08178	0.090999	1.08153	0.169805	1.08171	0.0387288
1.08204	0.114453	1.08227	0.0893532	1.08203	0.168883	1.0822	0.0388731
1.08253	0.113566	1.08277	0.0907851	1.08252	0.169901	1.0827	0.0390791
1.08305	0.11524	1.08328	0.0907647	1.08304	0.171137	1.0832	0.0389892
1.08355	0.114742	1.08378	0.0919683	1.08354	0.170808	1.0837	0.0393537
1.08405	0.115415	1.08427	0.088684	1.08405	0.170332	1.08418	0.0392367
1.08454	0.114939	1.08477	0.0942945	1.08454	0.171152	1.08468	0.0394762
1.08505	0.116645	1.08528	0.092832	1.08503	0.172458	1.08518	0.0394988
1.08555	0.116184	1.08578	0.0938266	1.08556	0.172886	1.08568	0.039417
1.08606	0.11716	1.08628	0.0903858	1.08605	0.171289	1.08618	0.0396705
1.08654	0.116092	1.08677	0.0940233	1.08654	0.173226	1.08667	0.0398556
1.08705	0.117614	1.08729	0.0941616	1.08705	0.173946	1.08719	0.0398789
1.08755	0.117965	1.08778	0.0923024	1.08753	0.174341	1.08769	0.0398871
1.08806	0.118722	1.08828	0.0920266	1.08805	0.173917	1.0882	0.0400213
1.08853	0.1173	1.08878	0.094792	1.08853	0.174978	1.0887	0.0402154
1.08905	0.119178	1.08929	0.0920631	1.08906	0.17616	1.08921	0.040185
1.08955	0.119269	1.08979	0.0959008	1.08953	0.175917	1.08971	0.0402155
1.09006	0.119794	1.09028	0.091117	1.09004	0.174776	1.0902	0.040453
1.09053	0.11864	1.09078	0.095892	1.09052	0.17541	1.0907	0.0407007
1.09105	0.120781	1.09128	0.0947419	1.09106	0.177951	1.09121	0.0405593
1.09155	0.119938	1.09179	0.0949366	1.09154	0.177256	1.0917	0.0407011
1.09206	0.12142	1.09227	0.0931464	1.09205	0.177583	1.0922	0.0408178
1.09255	0.120509	1.09278	0.0952849	1.09255	0.178093	1.09271	0.0412357
1.09305	0.122036	1.09328	0.0959774	1.09307	0.180242	1.09322	0.0409224
1.09356	0.122166	1.0938	0.0975228	1.09357	0.179116	1.0937	0.0409577
1.09407	0.123314	1.09428	0.0958075	1.09407	0.178069	1.0942	0.0411609
1.09455	0.12227	1.09479	0.0960081	1.09457	0.179134	1.0947	0.0412997
1.09506	0.12377	1.09529	0.0966578	1.09508	0.18048	1.0952	0.0413318
1.09555	0.123664	1.0958	0.0978839	1.09558	0.180707	1.09571	0.041398
1.09607	0.124391	1.09629	0.0967217	1.09608	0.180069	1.09621	0.0415837
1.09656	0.124105	1.0968	0.0980477	1.09656	0.181126	1.09672	0.0417778
1.09705	0.125168	1.09729	0.0962704	1.09708	0.182399	1.09723	0.0417894
1.09756	0.1246	1.0978	0.0980848	1.09757	0.182606	1.09771	0.0416872
1.09806	0.126408	1.09829	0.0963816	1.09804	0.181682	1.09822	0.0420091
1.09856	0.125831	1.09879	0.100079	1.09855	0.183093	1.0987	0.0421331
1.09906	0.126948	1.09929	0.098285	1.09906	0.183988	1.09922	0.0422175
1.09956	0.126757	1.09979	0.100186	1.09955	0.183999	1.09971	0.0422418
1.10006	0.127636	1.10029	0.0982389	1.10004	0.183719	1.10021	0.04238
1.10055	0.127051	1.10079	0.0987218	1.10053	0.184349	1.10071	0.0426446
1.10107	0.128929	1.10129	0.100147	1.10105	0.185485	1.1012	0.0425478
1.10156	0.128615	1.10179	0.0993916	1.10155	0.185819	1.10169	0.0425772
1.10207	0.129456	1.10229	0.09743	1.10203	0.184654	1.10219	0.04286
1.10255	0.128059	1.10278	0.0976957	1.10254	0.186217	1.10269	0.0430375
1.10307	0.130391	1.10329	0.100217	1.10304	0.187265	1.1032	0.0429498
1.10355	0.130644	1.10379	0.102142	1.10356	0.187486	1.10369	0.0430058
1.10407	0.131642	1.1043	0.100393	1.10405	0.187884	1.10419	0.0431305
1.10455	0.130288	1.10479	0.100896	1.10456	0.188092	1.1047	0.0435239
1.10506	0.132407	1.1053	0.101424	1.10507	0.189399	1.10521	0.0433838
1.10556	0.131719	1.1058	0.101966	1.10555	0.189203	1.10572	0.0435105
1.10607	0.133303	1.1063	0.101849	1.10606	0.188257	1.10621	0.0436225
1.10655	0.132237	1.1068	0.103966	1.10656	0.18981	1.10673	0.0438691
1.10707	0.134122	1.1073	0.101735	1.10707	0.191376	1.10722	0.0438382
1.10756	0.134187	1.1078	0.103506	1.10756	0.191061	1.10772	0.0438804
1.10807	0.134888	1.1083	0.101698	1.10804	0.191049	1.10821	0.0441603
1.10856	0.133715	1.1088	0.103995	1.10855	0.192489	1.10871	0.0443993
1.10906	0.136223	1.10929	0.103706	1.10905	0.193804	1.10921	0.0442181
1.10957	0.13561	1.1098	0.105268	1.10956	0.193215	1.10972	0.0443442
1.11007	0.1366	1.11029	0.102697	1.11005	0.191898	1.11019	0.0445347
1.11056	0.135764	1.1108	0.102961	1.11055	0.193314	1.11069	0.044778
1.11107	0.137676	1.11129	0.104392	1.11106	0.194435	1.1112	0.0447456
1.11157	0.138072	1.1118	0.105823	1.11157	0.194742	1.1117	0.0447651
1.11208	0.13888	1.11229	0.104592	1.11206	0.194085	1.11221	0.0449026
1.11257	0.138488	1.11281	0.105328	1.11258	0.195002	1.1127	0.0452294
1.11307	0.139837	1.1133	0.103929	1.11308	0.197001	1.11321	0.0451962
1.11358	0.139691	1.1138	0.105277	1.11358	0.196409	1.11371	0.0451535
1.11405	0.14061	1.11426	0.105952	1.11403	0.196152	1.11418	0.0454034
1.11452	0.140066	1.11476	0.106261	1.11452	0.197018	1.11468	0.0456139
1.11503	0.141605	1.11526	0.1072	1.11503	0.198214	1.11518	0.0455975
1.11553	0.142603	1.11577	0.108872	1.11553	0.198427	1.11569	0.045647
1.11604	0.143156	1.11626	0.106148	1.11602	0.1985	1.11618	0.0458202
1.11653	0.142155	1.11675	0.109398	1.11651	0.199098	1.11667	0.0461
1.11705	0.14454	1.11726	0.106708	1.11701	0.199974	1.11718	0.0461378
1.11754	0.144339	1.11776	0.108444	1.11753	0.200336	1.11767	0.0460538
1.11805	0.144985	1.11826	0.105754	1.118	0.199907	1.11815	0.0464333
1.11852	0.145084	1.11876	0.11014	1.11853	0.200479	1.11865	0.046492
1.11904	0.147189	1.11927	0.107656	1.11902	0.202503	1.11915	0.0465565
1.11954	0.146232	1.11976	0.109027	1.11953	0.202165	1.11966	0.0465968
1.12005	0.147923	1.12026	0.107746	1.12004	0.202455	1.12016	0.0467784
1.12053	0.147274	1.12076	0.11037	1.12054	0.202747	1.12066	0.0469742
1.12104	0.148342	1.12127	0.109632	1.12106	0.203935	1.12117	0.0470543
1.12153	0.148968	1.12177	0.10986	1.12155	0.204289	1.12167	0.0470563
1.12204	0.149922	1.12227	0.10919	1.12204	0.203762	1.12218	0.047147
1.12252	0.148905	1.12277	0.112553	1.12254	0.204775	1.12269	0.0475423
1.12305	0.15145	1.12328	0.111096	1.12303	0.206064	1.12319	0.0474944
1.12354	0.151185	1.12377	0.111485	1.12354	0.206138	1.12369	0.0476109
1.12405	0.152666	1.12427	0.110834	1.12404	0.206369	1.12419	0.0476712
1.12452	0.151715	1.12476	0.113422	1.12454	0.206807	1.1247	0.0481791
1.12504	0.154198	1.12526	0.113281	1.12503	0.208064	1.12519	0.0479351
1.12554	0.153714	1.12577	0.113805	1.12553	0.208275	1.1257	0.0480182
1.12606	0.155657	1.12626	0.11095	1.12603	0.207106	1.12618	0.0482713
1.12654	0.154795	1.12677	0.112661	1.12651	0.208525	1.12667	0.0484222
1.12704	0.156651	1.12726	0.113267	1.12703	0.210096	1.12717	0.0483984
1.12754	0.156393	1.12778	0.114249	1.12752	0.21008	1.12766	0.0484835
1.12805	0.158177	1.12827	0.112394	1.12803	0.209435	1.12817	0.0486395
1.12853	0.157028	1.12877	0.115538	1.12854	0.210942	1.12868	0.0489822
1.12904	0.159191	1.12927	0.11121	1.12904	0.211812	1.12918	0.0489697
1.12954	0.160436	1.12978	0.115488	1.12954	0.211919	1.12967	0.0489292
1.13005	0.161138	1.13027	0.113101	1.13002	0.211249	1.13019	0.0491368
1.13053	0.160095	1.13077	0.116379	1.13054	0.21289	1.13069	0.0494077
1.13102	0.162525	1.13127	0.11542	1.13105	0.213856	1.13119	0.0494225
1.13155	0.162972	1.13178	0.114607	1.13152	0.214275	1.13169	0.0495729
1.13205	0.163287	1.13227	0.114046	1.13202	0.213951	1.13218	0.0497712
1.13254	0.162922	1.13277	0.117052	1.13254	0.215062	1.13269	0.0500012
1.13303	0.165094	1.13327	0.117458	1.13303	0.216041	1.13319	0.0499027
1.13354	0.166226	1.13378	0.119012	1.13351	0.215611	1.13368	0.0499124
1.13406	0.167803	1.13427	0.116182	1.13399	0.215373	1.13416	0.050232
1.13453	0.166336	1.13477	0.118292	1.13451	0.216868	1.13467	0.0504239
1.13504	0.167808	1.13527	0.117815	1.13502	0.21809	1.13517	0.0504629
1.13554	0.168658	1.13577	0.119263	1.13553	0.218138	1.13565	0.0505766
1.13605	0.170897	1.13628	0.117151	1.13602	0.217976	1.13615	0.0507881
1.13654	0.170412	1.13676	0.120489	1.13654	0.218777	1.13665	0.0510587
1.13704	0.171311	1.13727	0.118444	1.13704	0.220471	1.13716	0.0509968
1.13753	0.171829	1.13777	0.12047	1.13754	0.220536	1.13765	0.0509928
1.13805	0.173983	1.13828	0.119496	1.13803	0.219749	1.13816	0.0512484
1.13853	0.172852	1.13877	0.120954	1.13854	0.220834	1.13866	0.0514853
1.13904	0.175888	1.13927	0.119571	1.13904	0.222411	1.13918	0.0515018
1.13954	0.17512	1.13978	0.12064	1.13954	0.222423	1.13969	0.0517196
1.14005	0.177388	1.14028	0.120984	1.14004	0.222388	1.1402	0.0517948
1.14054	0.177408	1.14078	0.121069	1.14051	0.223468	1.1407	0.0521055
1.14105	0.179399	1.14128	0.12144	1.14104	0.225023	1.14121	0.0520481
1.14154	0.179159	1.14178	0.122858	1.14154	0.224231	1.1417	0.0521369
1.14205	0.180702	1.14227	0.121792	1.14202	0.223898	1.1422	0.0524039
1.14255	0.181171	1.14278	0.124461	1.14252	0.225507	1.14269	0.0525105
1.14305	0.182758	1.14327	0.124743	1.14302	0.226419	1.14319	0.05248
1.14355	0.183464	1.14378	0.124186	1.14353	0.226519	1.1437	0.0525466
1.14406	0.184931	1.14427	0.120086	1.14404	0.226721	1.14418	0.0528518
1.14453	0.184726	1.14478	0.125403	1.14453	0.227271	1.14466	0.0531228
1.14506	0.187175	1.14527	0.123935	1.14504	0.229319	1.14518	0.0530601
1.14556	0.187682	1.14578	0.125172	1.14554	0.229166	1.14568	0.0531644
1.14606	0.189669	1.14627	0.125242	1.14604	0.22849	1.14616	0.0534739
1.14654	0.188562	1.14678	0.125764	1.14653	0.22972	1.14666	0.0537042
1.14705	0.191241	1.14727	0.125255	1.14703	0.230943	1.14717	0.0536566
1.14755	0.191853	1.14778	0.126529	1.14755	0.231364	1.14767	0.0538667
1.14807	0.194373	1.14828	0.12453	1.14804	0.231102	1.1482	0.0539194
1.14855	0.193819	1.14879	0.126579	1.14856	0.232547	1.1487	0.0542972
1.14906	0.19523	1.14928	0.126699	1.14906	0.233494	1.14921	0.0542578
1.14955	0.196353	1.1498	0.127282	1.14956	0.233681	1.14971	0.0542836
1.15006	0.197775	1.15029	0.126907	1.15006	0.232788	1.1502	0.0545084
1.15055	0.19775	1.15078	0.129179	1.15054	0.233882	1.1507	0.0549045
1.15106	0.200493	1.15129	0.127279	1.15103	0.23539	1.15119	0.0549076
1.15155	0.201147	1.15179	0.128272	1.15155	0.235749	1.1517	0.055003
1.15207	0.203507	1.15228	0.127872	1.15204	0.23559	1.1522	0.0551503
1.15254	0.202695	1.15278	0.130533	1.15253	0.236755	1.15268	0.0554117
1.15306	0.205394	1.15329	0.129459	1.15305	0.238179	1.15319	0.0554824
1.15356	0.205885	1.15378	0.128861	1.15355	0.238045	1.15369	0.0554774
1.15406	0.207193	1.15428	0.128428	1.15404	0.237353	1.15419	0.0557223
1.15455	0.20808	1.15478	0.131882	1.15457	0.238638	1.15468	0.055985
1.15506	0.210422	1.15529	0.132148	1.15508	0.240782	1.15519	0.0559734
1.15555	0.211178	1.15578	0.131588	1.15559	0.239938	1.1557	0.0562135
1.15606	0.212701	1.15628	0.13084	1.15607	0.241247	1.15619	0.0562869
1.15655	0.2135	1.15679	0.133218	1.15657	0.241289	1.15671	0.0569036
1.15708	0.216122	1.15731	0.131326	1.15711	0.244646	1.15724	0.0566843
1.15757	0.21646	1.1578	0.133098	1.15761	0.243002	1.15775	0.0566885
1.15809	0.218194	1.1583	0.130549	1.15809	0.242187	1.15824	0.0569532
1.15855	0.218492	1.15879	0.133818	1.15858	0.243561	1.15874	0.0571127
1.15907	0.221379	1.1593	0.133766	1.15908	0.244878	1.15924	0.057247
1.15958	0.222924	1.1598	0.136325	1.15956	0.245218	1.15973	0.0572657
1.16009	0.223911	1.16029	0.134127	1.16008	0.245019	1.16023	0.0574771
1.16056	0.224152	1.1608	0.134077	1.16055	0.245762	1.16072	0.0578692
1.16108	0.227475	1.16129	0.135863	1.16104	0.247222	1.16122	0.0577985
1.16158	0.228414	1.1618	0.136532	1.16156	0.247787	1.16171	0.0579837
1.16209	0.230505	1.16229	0.133709	1.16206	0.2476	1.1622	0.0581735
1.16257	0.229452	1.16279	0.137356	1.16257	0.248315	1.1627	0.0584916
1.16307	0.233383	1.16329	0.13761	1.16307	0.249295	1.16319	0.0584087
1.16357	0.234299	1.16381	0.134835	1.16357	0.249944	1.1637	0.0586438
1.16408	0.236781	1.16429	0.136458	1.16406	0.250307	1.1642	0.0587122
1.16457	0.236988	1.16479	0.138011	1.1646	0.251228	1.16472	0.0591076
1.16506	0.239152	1.16529	0.137273	1.16509	0.2524	1.16521	0.059216
1.16557	0.241138	1.16581	0.14029	1.16561	0.252497	1.16571	0.0590987
1.16608	0.243357	1.16629	0.138322	1.16608	0.251638	1.16622	0.059504
1.16656	0.243676	1.1668	0.139844	1.16657	0.253334	1.16672	0.0596471
1.16707	0.247248	1.1673	0.141323	1.16707	0.254396	1.16721	0.0597452
1.16757	0.248161	1.1678	0.140981	1.16756	0.254972	1.16772	0.0597311
1.16808	0.249826	1.16829	0.139629	1.16804	0.255125	1.16822	0.0600249
1.16856	0.251272	1.16879	0.141521	1.16855	0.256125	1.16871	0.0604494
1.16908	0.254364	1.16929	0.141171	1.16907	0.257261	1.16922	0.0603592
1.16957	0.25543	1.16979	0.142561	1.16955	0.257426	1.16971	0.0604687
1.17008	0.256476	1.17029	0.142485	1.17005	0.257333	1.17019	0.0606589
1.17057	0.258058	1.17079	0.143664	1.17057	0.258905	1.1707	0.0609469
1.17108	0.262224	1.17128	0.144437	1.17108	0.259959	1.17121	0.0609962
1.17158	0.263136	1.17179	0.144571	1.17156	0.260189	1.17171	0.0611357
1.1721	0.265555	1.1723	0.143358	1.17207	0.259733	1.1722	0.0613409
1.17257	0.265304	1.17279	0.14572	1.17258	0.261039	1.17271	0.0617611
1.17309	0.268752	1.1733	0.144079	1.17309	0.262917	1.17322	0.0615678
1.17357	0.270538	1.17381	0.145779	1.17359	0.262903	1.17373	0.0615322
1.17409	0.273387	1.17431	0.14462	1.1741	0.261851	1.17423	0.0620455
1.17457	0.27411	1.1748	0.14567	1.17457	0.263365	1.17473	0.0623024
1.17508	0.277034	1.17531	0.146887	1.17509	0.264797	1.17522	0.0623516
1.17557	0.278685	1.17581	0.147684	1.17558	0.265309	1.17572	0.0624625
1.17609	0.282327	1.1763	0.144139	1.17604	0.265437	1.17622	0.0626481
1.17658	0.281065	1.1768	0.148391	1.17657	0.2667	1.17671	0.0630562
1.17708	0.285357	1.17731	0.148392	1.17707	0.268317	1.17722	0.0629131
1.17758	0.286287	1.17781	0.148754	1.17758	0.268448	1.17772	0.0631556
1.17808	0.28996	1.17829	0.148439	1.17805	0.267713	1.1782	0.0633926
1.17858	0.291041	1.1788	0.149255	1.17857	0.268819	1.1787	0.0635881
1.17908	0.294284	1.1793	0.147919	1.17908	0.270572	1.17919	0.063718
1.17959	0.296862	1.1798	0.148379	1.17959	0.270098	1.17969	0.0638769
1.1801	0.299246	1.18029	0.150384	1.18009	0.270938	1.18019	0.0640799
1.18058	0.299201	1.18081	0.152314	1.18057	0.271585	1.18069	0.0644584
1.18108	0.303912	1.1813	0.150658	1.1811	0.273447	1.1812	0.064376
1.1816	0.305458	1.1818	0.152368	1.1816	0.273475	1.18169	0.0644317
1.18205	0.307752	1.18226	0.151459	1.18205	0.272485	1.18217	0.0647489
1.18253	0.308712	1.18277	0.15401	1.18256	0.27393	1.18268	0.0649186
1.18305	0.314	1.18326	0.152798	1.18307	0.275734	1.18319	0.0651401
1.18354	0.315242	1.18377	0.154142	1.18357	0.276453	1.18369	0.0652728
1.18405	0.318598	1.18427	0.15029	1.18405	0.275672	1.18418	0.0654641
1.18453	0.31853	1.18477	0.153615	1.18453	0.276904	1.18469	0.0658274
1.18505	0.323216	1.18527	0.154584	1.18504	0.278712	1.1852	0.0658233
1.18556	0.326278	1.18577	0.156025	1.18555	0.279228	1.18569	0.0659471
1.18606	0.328993	1.18626	0.154291	1.18604	0.278897	1.18618	0.0660989
1.18654	0.329646	1.18676	0.157312	1.18652	0.279347	1.18668	0.0664885
1.18705	0.334015	1.18727	0.156156	1.18704	0.281531	1.18719	0.0664681
1.18755	0.336306	1.18777	0.157359	1.18754	0.282208	1.18769	0.0666125
1.18807	0.340164	1.18826	0.154947	1.18804	0.282731	1.18818	0.0668722
1.18855	0.340847	1.18876	0.158074	1.18854	0.282967	1.18868	0.0673612
1.18906	0.344993	1.18928	0.154962	1.18906	0.284978	1.18919	0.0672452
1.18954	0.346833	1.18977	0.158901	1.18958	0.285333	1.18969	0.0673288
1.19005	0.351906	1.19027	0.154956	1.19007	0.283903	1.19018	0.0676721
1.19056	0.352519	1.19078	0.160255	1.19056	0.285716	1.19069	0.0679348
1.19106	0.356439	1.19129	0.155725	1.19107	0.287039	1.19119	0.0679842
1.19155	0.358876	1.19178	0.161784	1.19155	0.287248	1.19171	0.068101
1.19206	0.363532	1.19228	0.158598	1.19204	0.287269	1.1922	0.0684257
1.19254	0.36543	1.19277	0.160802	1.19255	0.288409	1.1927	0.0686065
1.19306	0.369893	1.19328	0.160016	1.19307	0.289986	1.19321	0.0688166
1.19357	0.371503	1.19378	0.162674	1.19357	0.290319	1.1937	0.0688446
1.19406	0.374039	1.19427	0.15941	1.19405	0.289983	1.19418	0.0690862
1.19454	0.377184	1.19477	0.162669	1.19456	0.291266	1.19469	0.0693199
1.19507	0.382054	1.19527	0.160047	1.19504	0.293335	1.19519	0.0694913
1.19558	0.384785	1.19578	0.162053	1.19554	0.29281	1.19568	0.069641
1.19606	0.387334	1.19627	0.164315	1.19604	0.29335	1.19617	0.0698264
1.19655	0.389519	1.19677	0.163254	1.19656	0.294111	1.19668	0.070154
1.19707	0.39569	1.19727	0.163778	1.19706	0.295863	1.19717	0.0702744
1.19756	0.396952	1.19779	0.166983	1.19756	0.295976	1.19768	0.070192
1.19808	0.402385	1.19827	0.164247	1.19806	0.295684	1.19817	0.070593
1.19856	0.402787	1.19877	0.166706	1.19857	0.296949	1.19867	0.0707385
1.19905	0.407448	1.19928	0.168161	1.19906	0.299473	1.19918	0.0708032
1.19956	0.4124	1.19978	0.168447	1.19957	0.299102	1.19969	0.0710555
1.20008	0.416574	1.20027	0.167111	1.20006	0.299662	1.20019	0.0714931
1.20055	0.417777	1.20078	0.169039	1.20058	0.300508	1.2007	0.0716662
1.20105	0.422195	1.20127	0.167963	1.20108	0.302307	1.20121	0.071807
1.20155	0.426154	1.20178	0.169724	1.20157	0.302267	1.20171	0.0717754
1.20207	0.430137	1.20227	0.16681	1.20206	0.302084	1.2022	0.0720328
1.20256	0.432554	1.20278	0.170047	1.20254	0.303827	1.2027	0.0725567
1.20307	0.437146	1.20328	0.170912	1.20305	0.304919	1.20319	0.0725272
1.20356	0.43966	1.20378	0.170125	1.20355	0.305524	1.2037	0.0726443
1.20408	0.445287	1.20428	0.172004	1.20404	0.305691	1.20418	0.0728389
1.20457	0.448201	1.20477	0.171739	1.20453	0.307031	1.20468	0.0734604
1.20507	0.452696	1.20528	0.171311	1.20507	0.309581	1.2052	0.0733105
1.20555	0.455106	1.20578	0.172178	1.20556	0.308763	1.20568	0.0733881
1.20608	0.462181	1.20628	0.171673	1.20606	0.308472	1.20617	0.0737675
1.20654	0.463053	1.20678	0.173063	1.20655	0.309841	1.20667	0.0738203
1.20706	0.470073	1.20728	0.175843	1.20707	0.311231	1.20718	0.0742537
1.20757	0.47334	1.20779	0.176188	1.20758	0.310891	1.20768	0.0741867
1.20808	0.477865	1.2083	0.176163	1.20808	0.311714	1.20819	0.074541
1.20855	0.479189	1.20879	0.175361	1.20859	0.31366	1.2087	0.0749051
1.20907	0.486044	1.20929	0.175918	1.20908	0.315169	1.20921	0.0749159
1.20956	0.491142	1.20979	0.179173	1.20958	0.314895	1.2097	0.0749907
1.21007	0.495194	1.21028	0.177493	1.21005	0.314856	1.2102	0.0753278
1.21055	0.496647	1.21079	0.179817	1.21056	0.316857	1.2107	0.0755454
1.21108	0.50413	1.21129	0.177787	1.21106	0.317588	1.21121	0.0755507
1.21156	0.507046	1.21179	0.18085	1.21154	0.318899	1.21171	0.0759254
1.21207	0.513821	1.21228	0.17822	1.21206	0.318903	1.2122	0.0760979
1.21257	0.516914	1.21279	0.18032	1.21256	0.319997	1.2127	0.0765119
1.21308	0.522838	1.21329	0.181248	1.21306	0.321927	1.21319	0.0765304
1.21357	0.526746	1.21379	0.182768	1.21357	0.322082	1.21369	0.07667
1.21409	0.530702	1.21428	0.181482	1.21404	0.321213	1.21417	0.0770008
1.21456	0.536264	1.21479	0.184664	1.21457	0.32299	1.21468	0.077179
1.21508	0.542516	1.21528	0.182458	1.21508	0.324841	1.2152	0.07742
1.21557	0.545243	1.21579	0.18563	1.2156	0.32524	1.2157	0.0776163
1.21608	0.551575	1.21629	0.182266	1.21608	0.325437	1.2162	0.0778719
1.21656	0.554072	1.2168	0.182784	1.21658	0.326753	1.2167	0.0782024
1.21709	0.561423	1.21729	0.186438	1.21708	0.328472	1.21721	0.078126
1.21757	0.562057	1.2178	0.187676	1.21758	0.328295	1.21772	0.0783124
1.21807	0.568459	1.21828	0.185587	1.21807	0.328876	1.2182	0.0786979
1.21856	0.572894	1.21879	0.190162	1.21857	0.330309	1.21872	0.0788498
1.21909	0.583083	1.21929	0.186378	1.21907	0.331606	1.21921	0.078854
1.21958	0.584476	1.2198	0.190147	1.21957	0.331798	1.21972	0.0792784
1.22008	0.592341	1.22029	0.187774	1.22007	0.33272	1.22021	0.0795915
1.22057	0.595778	1.2208	0.189013	1.22056	0.333659	1.22071	0.0803826
1.22109	0.602513	1.22131	0.190875	1.22111	0.33962	1.22126	0.0800174
1.2216	0.608524	1.22181	0.192189	1.22161	0.336885	1.22174	0.0800858
1.2221	0.612291	1.22231	0.191337	1.22211	0.335874	1.22222	0.0803968
1.22257	0.615721	1.2228	0.194398	1.22261	0.33697	1.22273	0.0806206
1.22312	0.625989	1.22331	0.19417	1.22311	0.337938	1.22323	0.0808256
1.22359	0.62881	1.22381	0.195379	1.22361	0.338927	1.22372	0.0809148
1.2241	0.637308	1.2243	0.19354	1.22411	0.339126	1.22423	0.0812603
1.22461	0.641848	1.22481	0.195617	1.22462	0.340873	1.22473	0.0816808
1.22512	0.650038	1.22532	0.196214	1.22513	0.342115	1.22523	0.0817256
1.22561	0.654814	1.22582	0.196778	1.22564	0.343066	1.22574	0.0818269
1.22611	0.660155	1.22631	0.194095	1.22613	0.342099	1.22623	0.0821538
1.2266	0.667105	1.22681	0.198932	1.22662	0.344789	1.22673	0.0823802
1.2271	0.672169	1.22732	0.197257	1.22711	0.345871	1.22724	0.0825466
1.22761	0.678024	1.22782	0.197797	1.22762	0.346724	1.22774	0.0826661
1.2281	0.682745	1.22832	0.19865	1.2281	0.346789	1.22823	0.0831005
1.22861	0.691917	1.22882	0.201316	1.22862	0.347544	1.22874	0.0833716
1.22911	0.697546	1.22931	0.201476	1.22912	0.349776	1.22924	0.0834664
1.22961	0.701142	1.22982	0.202309	1.22961	0.350638	1.22974	0.083445
1.23012	0.709011	1.23032	0.201228	1.23009	0.349369	1.23023	0.0839564
1.2306	0.713744	1.23081	0.203803	1.2306	0.351158	1.23073	0.084117
1.2311	0.72422	1.23131	0.203047	1.23109	0.353874	1.23122	0.0843914
1.23162	0.73179	1.23183	0.204212	1.23159	0.353997	1.23171	0.0844888
1.23212	0.734948	1.23232	0.203644	1.2321	0.354304	1.23222	0.0848629
1.2326	0.740764	1.23281	0.205503	1.2326	0.355397	1.23273	0.085163
1.2331	0.750957	1.23332	0.204647	1.2331	0.358035	1.23322	0.0852499
1.2336	0.758282	1.23383	0.20506	1.23361	0.358089	1.23371	0.0853888
1.23412	0.766841	1.23432	0.205804	1.2341	0.357681	1.23422	0.0857308
1.23461	0.773282	1.23482	0.210352	1.23463	0.358682	1.23473	0.0861319
1.23511	0.780292	1.23532	0.20786	1.23512	0.36111	1.23523	0.086065
1.23559	0.786279	1.23583	0.210532	1.2356	0.361591	1.23574	0.0865125
1.23612	0.79752	1.23632	0.207937	1.2361	0.362002	1.23623	0.0866815
1.23661	0.800815	1.23682	0.211897	1.23661	0.363781	1.23674	0.0871846
1.2371	0.806389	1.23732	0.211053	1.23712	0.365442	1.23725	0.0872561
1.23761	0.816105	1.23782	0.214802	1.23763	0.365859	1.23774	0.0873472
1.23812	0.822849	1.23832	0.213133	1.23809	0.364986	1.23822	0.0875766
1.2386	0.827661	1.23882	0.214723	1.23861	0.367233	1.23872	0.0878126
1.23912	0.840448	1.23931	0.214333	1.2391	0.368821	1.23922	0.0880765
1.23961	0.846602	1.23981	0.215877	1.23959	0.369202	1.23972	0.0882026
1.2401	0.851905	1.24032	0.216071	1.24009	0.369363	1.2402	0.0883732
1.2406	0.861643	1.24082	0.218094	1.2406	0.37111	1.24071	0.0891579
1.24114	0.871737	1.24132	0.217038	1.24111	0.373365	1.24121	0.0889844
1.24163	0.880132	1.24182	0.218395	1.24162	0.373514	1.24172	0.0891938
1.24212	0.886261	1.24233	0.217965	1.24211	0.372929	1.24221	0.0895478
1.24259	0.892873	1.24282	0.220488	1.24262	0.375425	1.24272	0.0900058
1.24312	0.905194	1.24333	0.219972	1.24313	0.377074	1.24324	0.0899599
1.24362	0.914687	1.24383	0.221902	1.24362	0.37732	1.24372	0.0902176
1.24412	0.919586	1.24433	0.219651	1.24413	0.377408	1.24424	0.0905702
1.2446	0.925564	1.24482	0.222999	1.24461	0.379425	1.24475	0.0909044
1.2451	0.93672	1.24533	0.221139	1.24511	0.381145	1.24526	0.0909809
1.24563	0.948887	1.24583	0.224568	1.24562	0.381893	1.24575	0.0910876
1.24615	0.954185	1.24633	0.22379	1.24609	0.381288	1.24625	0.0915416
1.24661	0.957876	1.24682	0.225296	1.24659	0.383149	1.24674	0.0917962
1.24711	0.972043	1.24732	0.226553	1.2471	0.385018	1.24724	0.0921254
1.24761	0.980046	1.24783	0.225625	1.24761	0.385099	1.24774	0.0922854
1.24814	0.992935	1.24832	0.227267	1.24809	0.385349	1.24822	0.0925182
1.24862	0.996913	1.24883	0.228789	1.2486	0.387031	1.24871	0.0928572
1.24912	1.00876	1.24932	0.228337	1.24912	0.389722	1.24923	0.0930169
1.2496	1.01807	1.24981	0.231466	1.24961	0.390045	1.24969	0.0931671
1.25009	1.0296	1.25028	0.229025	1.25009	0.389949	1.25018	0.093497
1.25059	1.03504	1.2508	0.232845	1.25059	0.391281	1.25069	0.0938708
1.25109	1.04424	1.25129	0.230908	1.2511	0.393892	1.2512	0.0941092
1.25159	1.05868	1.2518	0.232878	1.2516	0.394608	1.25171	0.094291
1.25206	1.06145	1.25229	0.233581	1.2521	0.395175	1.25219	0.0945752
1.25255	1.06976	1.2528	0.23601	1.25258	0.396253	1.2527	0.0950734
1.25311	1.08627	1.2533	0.234843	1.25308	0.39752	1.25322	0.0950903
1.25358	1.09107	1.2538	0.236463	1.25359	0.398062	1.25372	0.0951967
1.25406	1.09666	1.25429	0.236737	1.25408	0.397584	1.2542	0.0955887
1.25454	1.1084	1.25479	0.240066	1.25458	0.400141	1.25471	0.0959455
1.25509	1.12274	1.25529	0.240097	1.25506	0.400984	1.25519	0.0960645
1.25559	1.13245	1.25579	0.239832	1.25557	0.402035	1.2557	0.0961986
1.25606	1.13886	1.25628	0.240233	1.25607	0.403028	1.25619	0.0965627
1.2566	1.1563	1.25678	0.242458	1.25657	0.404356	1.25668	0.097093
1.25708	1.15964	1.2573	0.241421	1.25707	0.406954	1.25718	0.0971489
1.2576	1.17983	1.25779	0.245709	1.25759	0.407318	1.25769	0.0973286
1.25811	1.18641	1.25829	0.244262	1.25805	0.406659	1.25819	0.0978467
1.25858	1.1925	1.2588	0.245869	1.25857	0.408927	1.25869	0.0982061
1.25904	1.20246	1.25931	0.24455	1.25908	0.411743	1.25919	0.0983045
1.25961	1.2201	1.2598	0.24733	1.2596	0.411976	1.25971	0.0984018
1.26012	1.22968	1.2603	0.246334	1.26009	0.411744	1.26021	0.0987986
1.26057	1.23805	1.2608	0.249384	1.26059	0.413447	1.26072	0.0992512
1.26108	1.25182	1.26131	0.248883	1.26108	0.415217	1.26123	0.0994056
1.26159	1.26494	1.26181	0.251654	1.26159	0.415843	1.26172	0.0994803
1.26208	1.27527	1.2623	0.250257	1.26207	0.415614	1.26221	0.0999662
1.26259	1.2872	1.2628	0.252663	1.26256	0.41828	1.26271	0.100243
1.26311	1.29932	1.2633	0.25223	1.26307	0.420765	1.2632	0.100503
1.26358	1.30847	1.2638	0.253416	1.26357	0.42142	1.2637	0.10076
1.2641	1.32486	1.26429	0.255036	1.26405	0.421969	1.26419	0.101002
1.2646	1.33363	1.26478	0.256084	1.26457	0.422345	1.2647	0.101505
1.2651	1.34215	1.26528	0.257142	1.26506	0.425408	1.2652	0.101536
1.26559	1.35562	1.2658	0.260076	1.26557	0.425238	1.26568	0.101742
1.26608	1.36811	1.26629	0.257492	1.26608	0.426109	1.26617	0.102047
1.26658	1.38157	1.26679	0.260646	1.26659	0.427487	1.26669	0.102597
1.26711	1.39247	1.26729	0.260105	1.2671	0.429497	1.26718	0.102832
1.2676	1.40457	1.26781	0.260479	1.26759	0.429821	1.26768	0.102994
1.26809	1.41771	1.26829	0.263548	1.2681	0.430952	1.26819	0.103417
1.26861	1.43556	1.2688	0.263533	1.26861	0.43254	1.26871	0.103939
1.2691	1.44715	1.2693	0.26674	1.2691	0.434541	1.2692	0.103844
1.26958	1.45613	1.26981	0.267775	1.26961	0.434564	1.26971	0.104045
1.27008	1.46888	1.2703	0.266907	1.2701	0.435154	1.2702	0.104465
1.27062	1.48634	1.2708	0.268468	1.27059	0.43654	1.27071	0.104874
1.27106	1.49447	1.2713	0.270121	1.27109	0.438665	1.27121	0.105137
1.2716	1.51204	1.2718	0.270731	1.27156	0.439889	1.27171	0.105356
1.2721	1.5227	1.27229	0.271328	1.27206	0.440233	1.2722	0.105756
1.2726	1.53518	1.27279	0.273057	1.27257	0.441765	1.27271	0.106081
1.27305	1.5438	1.27329	0.270868	1.27308	0.44382	1.27321	0.106368
1.27359	1.5639	1.27379	0.274068	1.27355	0.444387	1.27369	0.10638
1.27411	1.58201	1.2743	0.275368	1.27406	0.444936	1.27419	0.106779
1.27458	1.59407	1.27479	0.278554	1.27458	0.446817	1.2747	0.107297
1.2751	1.60904	1.2753	0.279449	1.27508	0.448358	1.27519	0.1074
1.2756	1.62103	1.2758	0.279605	1.27559	0.449336	1.2757	0.107698
1.27609	1.63395	1.27631	0.27957	1.27609	0.450859	1.2762	0.108085
1.27661	1.65553	1.2768	0.2813	1.27659	0.451882	1.2767	0.108585
1.27709	1.65611	1.27731	0.283137	1.27711	0.453595	1.27721	0.108737
1.27757	1.67422	1.27781	0.284862	1.27761	0.454501	1.27772	0.108957
1.27815	1.70125	1.27831	0.281898	1.27809	0.453961	1.2782	0.109363
1.27855	1.69481	1.27881	0.287994	1.27859	0.456655	1.27871	0.109743
1.27911	1.72803	1.27931	0.287476	1.27909	0.458911	1.27922	0.109893
1.27959	1.73512	1.27981	0.287929	1.27959	0.459826	1.27973	0.11019
1.28016	1.75583	1.2803	0.288438	1.28007	0.460666	1.28022	0.110653
1.28054	1.7583	1.2808	0.287869	1.28056	0.462227	1.28071	0.111148
1.2811	1.79004	1.2813	0.292704	1.28108	0.464183	1.28122	0.111197
1.28161	1.80401	1.2818	0.293358	1.28159	0.465138	1.28173	0.111388
1.28211	1.81423	1.28229	0.292436	1.28207	0.465332	1.2822	0.112059
1.28266	1.83219	1.2828	0.296644	1.28258	0.467219	1.2827	0.112362
1.28307	1.83511	1.2833	0.295212	1.28309	0.469509	1.28321	0.112611
1.28352	1.85874	1.28377	0.298445	1.28359	0.469816	1.2837	0.112838
1.28417	1.88261	1.28434	0.297944	1.28411	0.471128	1.28421	0.113111
1.28463	1.89341	1.28485	0.300244	1.28462	0.47242	1.28472	0.113845
1.28512	1.90615	1.28535	0.302959	1.28514	0.476859	1.28524	0.113894
1.28562	1.92913	1.28585	0.302682	1.28564	0.475715	1.28575	0.114061
1.28607	1.94004	1.28634	0.303176	1.28612	0.476146	1.28624	0.114567
1.28674	1.98008	1.28686	0.30354	1.28662	0.477148	1.28674	0.1149
1.28722	1.97904	1.28735	0.30556	1.28713	0.479694	1.28726	0.11511
1.28757	1.98322	1.28786	0.308983	1.28764	0.48111	1.28776	0.115536
1.28811	2.01846	1.28835	0.305635	1.28813	0.481369	1.28826	0.115773
1.28861	2.02734	1.28885	0.308581	1.28861	0.483964	1.28876	0.11632
1.28923	2.05918	1.28935	0.309771	1.28912	0.485803	1.28926	0.116499
1.28964	2.05364	1.28985	0.313656	1.28962	0.486553	1.28975	0.116792
1.29004	2.07988	1.29035	0.312229	1.29011	0.486174	1.29025	0.117199
1.29066	2.10408	1.29084	0.314774	1.2906	0.489218	1.29073	0.117676
1.29109	2.11006	1.29135	0.315313	1.29111	0.490559	1.29124	0.118098
1.29172	2.14581	1.29185	0.319279	1.29161	0.492154	1.29173	0.118187
1.29217	2.14819	1.29234	0.314854	1.2921	0.492814	1.29222	0.118598
1.29261	2.16436	1.29285	0.319525	1.29262	0.494993	1.29272	0.118991
1.2931	2.18552	1.29336	0.321438	1.29312	0.49684	1.29323	0.11924
1.29368	2.21677	1.29386	0.323352	1.29364	0.497451	1.29372	0.119511
1.2942	2.22602	1.29435	0.322771	1.29413	0.497836	1.29423	0.120141
1.29456	2.2335	1.29486	0.326487	1.29463	0.49964	1.29473	0.120621
1.29517	2.2681	1.29537	0.326746	1.29512	0.501982	1.29524	0.120925
1.2956	2.27024	1.29586	0.328573	1.29563	0.502898	1.29574	0.121137
1.29609	2.2982	1.29637	0.326385	1.29613	0.503595	1.29624	0.12137
1.29675	2.32784	1.29686	0.331984	1.29663	0.505386	1.29675	0.122046
1.29715	2.32506	1.29736	0.330941	1.29712	0.508793	1.29726	0.122184
1.29749	2.33557	1.29786	0.334843	1.29761	0.50963	1.29776	0.122359
1.2981	2.37647	1.29836	0.333924	1.29811	0.510463	1.29824	0.122903
1.29867	2.40786	1.29886	0.336791	1.29861	0.512065	1.29874	0.123352
1.29921	2.42744	1.29936	0.336551	1.2991	0.514188	1.29925	0.123481
1.29954	2.42477	1.29986	0.340698	1.29959	0.51476	1.29975	0.123956
1.30027	2.48004	1.30035	0.339767	1.30011	0.516857	1.30022	0.124344
1.30061	2.47576	1.30084	0.3427	1.30061	0.517678	1.30075	0.124971
1.30125	2.50992	1.30135	0.34233	1.30113	0.520988	1.30124	0.124993
1.30158	2.50726	1.30187	0.346205	1.30163	0.520805	1.30175	0.125322
1.30222	2.56053	1.30235	0.344261	1.30212	0.521631	1.30224	0.125736
1.30245	2.54657	1.30285	0.348749	1.30262	0.523841	1.30275	0.126425
1.30321	2.60137	1.30336	0.349717	1.30315	0.525473	1.30324	0.126449
1.30375	2.61869	1.30387	0.352767	1.30364	0.527835	1.30373	0.126868
1.30405	2.61906	1.30435	0.348619	1.30414	0.527724	1.30425	0.127361
1.30458	2.64937	1.30487	0.354662	1.30463	0.529838	1.30476	0.127878
1.30511	2.67133	1.30536	0.353989	1.30513	0.532519	1.30526	0.128122
1.30576	2.71552	1.30587	0.358624	1.30563	0.533688	1.30576	0.128266
1.30623	2.72609	1.30636	0.356694	1.30611	0.5333	1.30625	0.128849
1.30642	2.7036	1.30686	0.362466	1.3066	0.536153	1.30676	0.129433
1.30714	2.77757	1.30736	0.361966	1.30713	0.538964	1.30725	0.129755
1.3077	2.78519	1.30786	0.3627	1.30758	0.539273	1.30774	0.129942
1.30814	2.79533	1.30836	0.363954	1.30811	0.539959	1.30825	0.130595
1.30849	2.80692	1.30886	0.367483	1.30862	0.542166	1.30874	0.131041
1.3092	2.86182	1.30936	0.367199	1.30912	0.544527	1.30924	0.131235
1.30966	2.85593	1.30987	0.370497	1.30963	0.545843	1.30974	0.131524
1.31015	2.89868	1.31037	0.368515	1.31012	0.546462	1.31022	0.132074
1.31062	2.91502	1.31086	0.374577	1.31063	0.548485	1.31073	0.132523
1.31113	2.93565	1.31137	0.373953	1.31112	0.550886	1.31124	0.132766
1.31157	2.95258	1.31187	0.375999	1.31163	0.552154	1.31175	0.133174
1.31219	3.00303	1.31237	0.376194	1.31213	0.552912	1.31223	0.133553
1.31266	3.01034	1.31286	0.379877	1.31261	0.555482	1.31276	0.134131
1.31309	3.03344	1.31337	0.379982	1.31313	0.557762	1.31327	0.134292
1.31364	3.06332	1.31388	0.38214	1.31365	0.558452	1.31377	0.134779
1.31416	3.08517	1.31438	0.382488	1.31414	0.559853	1.31427	0.135074
1.31462	3.10452	1.31487	0.386569	1.31463	0.561528	1.31478	0.135848
1.31522	3.13814	1.31537	0.388037	1.31514	0.564642	1.31527	0.135992
1.31565	3.15041	1.31587	0.391116	1.31564	0.56563	1.31577	0.136507
1.31608	3.16836	1.31637	0.389686	1.31611	0.566754	1.31625	0.13683
1.31668	3.21362	1.31688	0.394246	1.31661	0.568956	1.31675	0.137613
1.31714	3.22128	1.31738	0.395269	1.31713	0.570744	1.31727	0.137735
1.31759	3.24341	1.31784	0.39718	1.31761	0.572051	1.3177	0.138129
1.31809	3.32919	1.31833	0.39548	1.3181	0.572452	1.3182	0.138635
1.31858	3.32364	1.31884	0.40203	1.31861	0.575321	1.31871	0.13891
1.31906	3.3428	1.31933	0.401802	1.31911	0.577042	1.3192	0.139452
1.31968	3.37986	1.31983	0.404817	1.31962	0.578875	1.31971	0.139765
1.32015	3.38646	1.32033	0.403987	1.3201	0.579336	1.32021	0.140326
1.32055	3.39583	1.32085	0.407818	1.32061	0.582121	1.32071	0.140898
1.32107	3.43419	1.32134	0.408696	1.32112	0.584975	1.32122	0.141015
1.32163	3.469	1.32184	0.413258	1.32163	0.585863	1.32172	0.141584
1.32211	3.49642	1.32233	0.41194	1.32211	0.586578	1.32222	0.141893
1.32258	3.51795	1.32284	0.417448	1.32256	0.588435	1.32273	0.142496
1.32311	3.55417	1.32333	0.416636	1.3231	0.590725	1.32323	0.142812
1.32356	3.56734	1.32384	0.42048	1.32359	0.593363	1.32372	0.14314
1.32421	3.61374	1.32433	0.419584	1.32411	0.594342	1.32424	0.143748
1.32462	3.62096	1.32483	0.423931	1.32459	0.595877	1.32473	0.144378
1.32507	3.65476	1.32534	0.423559	1.32508	0.598461	1.32523	0.144697
1.3256	3.69609	1.32584	0.427045	1.32559	0.599261	1.32571	0.145059
1.32607	3.71878	1.32633	0.426411	1.32607	0.600605	1.32621	0.145715
1.32667	3.75263	1.32684	0.432269	1.3266	0.60296	1.32671	0.146218
1.32713	3.77681	1.32735	0.43306	1.32711	0.606185	1.3272	0.146489
1.32762	3.81025	1.32784	0.434994	1.32761	0.606879	1.32771	0.146906
1.32808	3.82852	1.32834	0.435143	1.3281	0.60717	1.32821	0.147269
1.32866	3.86644	1.32883	0.439033	1.3286	0.609881	1.32871	0.148078
1.32917	3.8944	1.32936	0.439114	1.32912	0.612913	1.32922	0.148268
1.3296	3.91771	1.32985	0.443234	1.32963	0.614945	1.32972	0.148508
1.33015	3.96014	1.33035	0.441396	1.3301	0.614839	1.33022	0.149309
1.33058	3.97852	1.33084	0.446972	1.33061	0.617625	1.33073	0.149696
1.33115	4.01223	1.33135	0.448866	1.3311	0.620312	1.33124	0.149857
1.33168	4.0437	1.33185	0.451992	1.3316	0.620843	1.33175	0.150655
1.33215	4.0735	1.33234	0.453569	1.33209	0.622512	1.33224	0.150985
1.33258	4.09549	1.33285	0.456735	1.33258	0.624602	1.33274	0.151796
1.33312	4.13665	1.33334	0.456033	1.33311	0.628685	1.33325	0.152033
1.33366	4.16551	1.33385	0.46145	1.33359	0.629472	1.33375	0.152339
1.33412	4.19042	1.33434	0.462623	1.33409	0.629498	1.33421	0.152991
1.33463	4.23164	1.33483	0.466678	1.3346	0.632085	1.33472	0.153586
1.33514	4.26187	1.33534	0.466399	1.3351	0.634281	1.33521	0.153806
1.33563	4.28764	1.33586	0.469014	1.3356	0.636147	1.3357	0.154523
1.33618	4.31209	1.33635	0.470697	1.3361	0.637772	1.33621	0.15505
1.33667	4.3336	1.33684	0.472399	1.33662	0.64039	1.33672	0.15548
1.33709	4.35942	1.33733	0.47543	1.33712	0.643062	1.33721	0.155872
1.33759	4.39986	1.33785	0.480094	1.33761	0.644787	1.33773	0.156294
1.33818	4.44583	1.33834	0.480386	1.33812	0.644985	1.33822	0.156929
1.3386	4.46802	1.33885	0.481269	1.3386	0.64738	1.33873	0.157477
1.33917	4.51153	1.33934	0.485447	1.33911	0.651142	1.33924	0.157773
1.33964	4.55205	1.33984	0.48786	1.33962	0.652632	1.33975	0.15832
1.34012	4.57161	1.34034	0.488469	1.34012	0.653611	1.34024	0.158855
1.34059	4.60422	1.34084	0.494806	1.34062	0.655882	1.34074	0.159469
1.34117	4.65317	1.34134	0.49397	1.34111	0.658555	1.34124	0.159927
1.34166	4.68514	1.34185	0.497876	1.34158	0.659329	1.34173	0.160256
1.3421	4.70482	1.34234	0.498672	1.34209	0.661125	1.34222	0.160768
1.34265	4.74567	1.34284	0.502112	1.34257	0.663313	1.34272	0.161442
1.34317	4.77936	1.34335	0.505206	1.34309	0.66722	1.34321	0.162013
1.3436	4.79839	1.34386	0.50595	1.3436	0.668443	1.34371	0.162308
1.34421	4.84163	1.34435	0.507066	1.3441	0.669979	1.34421	0.162939
1.34461	4.84995	1.34484	0.512396	1.34461	0.671408	1.34471	0.163672
1.34514	4.88606	1.34534	0.51383	1.34513	0.674797	1.34522	0.163959
1.34566	4.92706	1.34586	0.517307	1.34562	0.675666	1.34573	0.164458
1.34611	4.96616	1.34636	0.51803	1.3461	0.677905	1.34621	0.164919
1.34661	5.00163	1.34685	0.522262	1.34664	0.681011	1.34673	0.165686
1.34718	5.05818	1.34736	0.524737	1.34713	0.683187	1.34724	0.166114
1.34765	5.07056	1.34785	0.527387	1.34763	0.685083	1.34774	0.166709
1.34811	5.10176	1.34835	0.52826	1.34813	0.686618	1.34824	0.16706
1.34868	5.14874	1.34885	0.533372	1.34862	0.688723	1.34876	0.167909
1.34917	5.17574	1.34937	0.534248	1.34915	0.693089	1.34929	0.168267
1.34961	5.20863	1.34986	0.534993	1.34964	0.69321	1.34978	0.168557
1.35018	5.26314	1.35035	0.539246	1.35012	0.695024	1.35025	0.169303
1.35063	5.28244	1.35085	0.544152	1.35061	0.697209	1.35076	0.169766
1.35113	5.31917	1.35135	0.545784	1.35112	0.699848	1.35125	0.170374
1.35167	5.36935	1.35183	0.548832	1.35161	0.7016	1.35173	0.171079
1.35214	5.38771	1.35236	0.550948	1.35213	0.703661	1.35223	0.171559
1.35261	5.42892	1.35286	0.555311	1.35262	0.705237	1.35272	0.172199
1.35316	5.50037	1.35335	0.556131	1.35312	0.709326	1.35323	0.172717
1.35367	5.53671	1.35385	0.559844	1.35363	0.711008	1.35373	0.172866
1.35415	5.57343	1.35435	0.560729	1.35409	0.710362	1.35421	0.173631
1.35468	5.62057	1.35487	0.566025	1.35461	0.714478	1.35472	0.174231
1.35516	5.65372	1.35535	0.56494	1.35514	0.717143	1.35523	0.174717
1.35565	5.69154	1.35586	0.572446	1.35563	0.72003	1.35573	0.175203
1.35622	5.7535	1.35635	0.573478	1.35612	0.72018	1.35624	0.175744
1.35663	5.76437	1.35686	0.577974	1.35662	0.724103	1.35674	0.176679
1.35712	5.79661	1.35736	0.579361	1.35712	0.725789	1.35724	0.177126
1.35767	5.84951	1.35786	0.58406	1.35762	0.72883	1.35774	0.177492
1.3582	5.88526	1.35834	0.583245	1.35811	0.72965	1.35824	0.178314
1.35861	5.91543	1.35885	0.589745	1.35861	0.732579	1.35873	0.178938
1.35918	5.96429	1.35935	0.59174	1.35909	0.735769	1.35924	0.179315
1.35972	6.00699	1.35986	0.596112	1.35962	0.737791	1.35973	0.17986
1.36014	6.0309	1.36035	0.597535	1.36008	0.738625	1.36022	0.180398
1.36063	6.07532	1.36085	0.601712	1.3606	0.741709	1.36073	0.181421
1.36118	6.11455	1.36136	0.602949	1.36111	0.745843	1.36121	0.181452
1.36164	6.13403	1.36186	0.607112	1.36163	0.74668	1.36173	0.182118
1.36216	6.16685	1.36236	0.611058	1.36211	0.747526	1.36224	0.182891
1.36264	6.21696	1.36285	0.611199	1.36262	0.751494	1.36273	0.183543
1.36317	6.26358	1.36336	0.616032	1.36313	0.755022	1.36323	0.183976
1.36368	6.31087	1.36385	0.61992	1.36365	0.756241	1.36373	0.184598
1.36415	6.34166	1.36436	0.620157	1.36414	0.756752	1.36424	0.185455
1.36463	6.37917	1.36485	0.628593	1.36463	0.760427	1.36474	0.186134
1.36513	6.42605	1.36536	0.629229	1.36515	0.76506	1.36526	0.186644
1.36568	6.4776	1.36586	0.63094	1.36564	0.766946	1.36574	0.187112
1.36619	6.50589	1.36637	0.633751	1.36613	0.766512	1.36625	0.18767
1.36661	6.53538	1.36686	0.637439	1.36661	0.769612	1.36674	0.188453
1.36719	6.59402	1.36736	0.644172	1.3671	0.773219	1.36726	0.189041
1.36763	6.62147	1.36786	0.647117	1.36762	0.776035	1.36775	0.189746
1.3682	6.68199	1.36835	0.648307	1.36811	0.77767	1.36823	0.190175
1.36861	6.71564	1.36884	0.654215	1.36861	0.78056	1.36874	0.190946
1.36918	6.79028	1.36934	0.656693	1.3691	0.782959	1.36923	0.191364
1.36964	6.83073	1.36987	0.661289	1.36961	0.785839	1.36973	0.191959
1.37017	6.86152	1.37035	0.662517	1.37011	0.786431	1.37022	0.192641
1.37066	6.88822	1.37084	0.664825	1.37062	0.790436	1.37072	0.193145
1.37118	6.92482	1.37135	0.671918	1.3711	0.793072	1.37123	0.193878
1.37167	6.97872	1.37187	0.672446	1.37162	0.796103	1.37172	0.194576
1.37218	7.03881	1.37235	0.676877	1.37213	0.797745	1.37223	0.195256
1.37266	7.07917	1.37285	0.681789	1.37261	0.800647	1.37275	0.195979
1.37318	7.12492	1.37336	0.684043	1.37315	0.804033	1.37324	0.196574
1.37367	7.1611	1.37387	0.690409	1.37363	0.805656	1.37374	0.196832
1.37415	7.19683	1.37435	0.690082	1.37413	0.807664	1.37425	0.197927
1.37464	7.23857	1.37486	0.6962	1.37462	0.810675	1.37474	0.198683
1.37519	7.28704	1.37536	0.696988	1.37512	0.813691	1.37524	0.199318
1.37568	7.33752	1.37586	0.702624	1.37562	0.816205	1.37574	0.199906
1.37617	7.38465	1.37637	0.70555	1.3761	0.817233	1.37624	0.200517
1.37668	7.42852	1.37686	0.710366	1.37661	0.821879	1.37674	0.201392
1.37718	7.47558	1.37735	0.712964	1.3771	0.825667	1.37723	0.20169
1.37768	7.52097	1.37786	0.719839	1.37762	0.827317	1.37774	0.20242
1.37821	7.55727	1.37837	0.720065	1.37811	0.82796	1.37822	0.202962
1.37866	7.58414	1.37888	0.726488	1.37861	0.832219	1.37873	0.203756
1.37915	7.62946	1.37936	0.726706	1.37913	0.836287	1.37923	0.204398
1.37968	7.67623	1.37986	0.734577	1.37964	0.839155	1.37974	0.204931
1.38021	7.73901	1.38036	0.736194	1.38014	0.839717	1.38023	0.205882
1.38064	7.78381	1.38085	0.740875	1.38063	0.842122	1.38074	0.206757
1.38118	7.84297	1.38137	0.743369	1.38115	0.845845	1.38124	0.207368
1.38169	7.88656	1.38187	0.749959	1.38165	0.848999	1.38174	0.207719
1.38219	7.91311	1.38237	0.750775	1.38214	0.848805	1.38225	0.208641
1.38269	7.97522	1.38287	0.757802	1.38263	0.854109	1.38275	0.209432
1.38317	8.04161	1.38336	0.757937	1.3831	0.855973	1.38325	0.209863
1.3837	8.09587	1.38386	0.766076	1.38364	0.859534	1.38377	0.210574
1.38416	8.13194	1.38437	0.766918	1.38412	0.862072	1.38426	0.211462
1.38468	8.18413	1.38487	0.774119	1.38462	0.865203	1.38474	0.212217
1.38524	8.28932	1.38536	0.775723	1.38513	0.868087	1.38525	0.212643
1.38565	8.31591	1.38583	0.78313	1.38559	0.870355	1.38569	0.213414
1.38613	8.34994	1.38632	0.784032	1.38609	0.87246	1.38619	0.214222
1.38665	8.38756	1.38683	0.78905	1.38657	0.874801	1.38669	0.214997
1.38719	8.45211	1.38733	0.794992	1.38709	0.88025	1.38718	0.215552
1.38762	8.49353	1.38783	0.799361	1.38759	0.881511	1.38769	0.216324
1.38813	8.54506	1.38831	0.7989	1.3881	0.884652	1.38818	0.217089
1.38864	8.58278	1.38883	0.809989	1.38859	0.887558	1.38869	0.217975
1.38914	8.63205	1.38933	0.811091	1.3891	0.890785	1.3892	0.218558
1.38968	8.67949	1.38984	0.818134	1.38961	0.893533	1.3897	0.219377
1.39014	8.73569	1.39032	0.818832	1.39008	0.894804	1.3902	0.219957
1.39061	8.78945	1.39082	0.826199	1.39058	0.898756	1.3907	0.220896
1.39112	8.83729	1.39132	0.830627	1.39108	0.903801	1.3912	0.221633
1.39167	8.89616	1.39183	0.8336	1.39158	0.904502	1.39171	0.222122
1.39216	8.94154	1.39233	0.83776	1.39207	0.906999	1.3922	0.223006
1.39263	8.98998	1.39282	0.845615	1.39258	0.912411	1.39269	0.223728
1.39314	9.0368	1.39333	0.848096	1.39308	0.916413	1.39321	0.224357
1.39364	9.09702	1.39383	0.853743	1.39356	0.916847	1.39371	0.225159
1.39415	9.15545	1.39431	0.856816	1.39407	0.920015	1.39419	0.226187
1.39467	9.18229	1.39482	0.862623	1.39456	0.922343	1.39468	0.226826
1.39515	9.2463	1.39533	0.867096	1.39508	0.928262	1.3952	0.227591
1.39562	9.30064	1.39584	0.873316	1.39556	0.928568	1.3957	0.228518
1.39619	9.36484	1.39633	0.874999	1.39608	0.932116	1.3962	0.228778
1.39663	9.40928	1.39682	0.882802	1.3966	0.935788	1.3967	0.230177
1.39716	9.46259	1.39734	0.887345	1.3971	0.939462	1.39721	0.230785
1.39763	9.51092	1.39783	0.891044	1.3976	0.942608	1.39771	0.231413
1.39812	9.55954	1.39834	0.89424	1.3981	0.943857	1.39822	0.23232
1.39866	9.61809	1.39883	0.901327	1.39862	0.948258	1.39871	0.232919
1.39916	9.67398	1.39934	0.904873	1.39911	0.952209	1.39923	0.23378
1.39965	9.72458	1.39984	0.910514	1.39961	0.954435	1.39973	0.234475
1.40017	9.77671	1.40034	0.913601	1.40009	0.957285	1.40022	0.235687
1.40063	9.82082	1.40084	0.921989	1.40058	0.960722	1.40072	0.236146
1.40115	9.86372	1.40134	0.924635	1.40109	0.964796	1.40123	0.237102
1.40166	9.94211	1.40184	0.930835	1.40159	0.967191	1.40172	0.23762
1.40218	10.0293	1.40235	0.936055	1.40208	0.970702	1.40221	0.238706
1.40262	10.0779	1.40284	0.939152	1.40258	0.973261	1.40271	0.23963
1.40314	10.1214	1.40332	0.945153	1.40308	0.978183	1.40321	0.240371
1.40368	10.1807	1.40383	0.952953	1.40359	0.9815	1.4037	0.240805
1.40416	10.2351	1.40432	0.954908	1.40409	0.982291	1.4042	0.241786
1.40463	10.2928	1.40482	0.960014	1.40459	0.988774	1.4047	0.242883
1.40515	10.3267	1.40534	0.968117	1.40512	0.991675	1.40522	0.243611
1.40563	10.3784	1.40585	0.973475	1.4056	0.993187	1.40571	0.24427
1.40617	10.4167	1.40633	0.977352	1.40611	0.996257	1.4062	0.245376
1.40668	10.4725	1.40683	0.981806	1.40662	1.00138	1.40671	0.246346
1.40714	10.5038	1.40735	0.989564	1.40711	1.00378	1.40722	0.246941
1.40763	10.5652	1.40789	0.994591	1.40757	1.00788	1.40772	0.247713
1.40815	10.6244	1.40833	0.997712	1.40811	1.01093	1.40821	0.248538
1.40868	10.6912	1.40882	1.00398	1.4086	1.01418	1.40872	0.249661
1.40916	10.7448	1.40932	1.01175	1.40911	1.01865	1.40923	0.250407
1.40965	10.7888	1.40984	1.0173	1.40962	1.02188	1.40972	0.250913
1.41012	10.8399	1.41032	1.02019	1.41009	1.0251	1.41021	0.251774
1.41066	10.9085	1.41083	1.03017	1.41058	1.02783	1.41071	0.253126
1.41116	10.9528	1.41135	1.03575	1.41108	1.03325	1.41122	0.25367
1.41166	11.0128	1.41186	1.03926	1.4116	1.03654	1.41171	0.254706
1.41217	11.068	1.41234	1.0417	1.41209	1.03794	1.41221	0.25554
1.41264	11.1417	1.41285	1.05227	1.4126	1.04225	1.41271	0.256901
1.41316	11.261	1.41334	1.05747	1.41312	1.04927	1.41323	0.257483
1.41369	11.293	1.41383	1.06247	1.41362	1.05008	1.41373	0.257995
1.41418	11.3407	1.41437	1.06829	1.41412	1.05388	1.41423	0.259443
1.41464	11.4043	1.41485	1.07338	1.41461	1.05752	1.41474	0.259989
1.41518	11.4797	1.41535	1.08091	1.41515	1.06085	1.41524	0.260891
1.4157	11.5492	1.41586	1.08768	1.41563	1.06339	1.41573	0.261789
1.41618	11.6997	1.41636	1.08848	1.41611	1.06619	1.41623	0.262511
1.41663	11.734	1.41685	1.09746	1.41664	1.0719	1.41674	0.263622
1.41718	11.7915	1.41736	1.10596	1.41711	1.07532	1.41725	0.264244
1.41765	11.8496	1.41785	1.11213	1.41762	1.07876	1.41775	0.265338
1.41819	11.9113	1.41835	1.11616	1.41813	1.08454	1.41824	0.266217
1.41865	11.9586	1.41885	1.12371	1.41859	1.0859	1.41875	0.267269
1.41914	12.0074	1.41936	1.12877	1.41909	1.09125	1.41923	0.267852
1.41964	12.0763	1.41984	1.13776	1.4196	1.09578	1.41975	0.268916
1.42021	12.1406	1.42036	1.14335	1.42011	1.09711	1.42025	0.270134
1.42067	12.1915	1.4209	1.14716	1.42063	1.10295	1.42075	0.271053
1.42117	12.2519	1.42133	1.15106	1.42114	1.10518	1.42123	0.272056
1.42167	12.3075	1.42184	1.16172	1.42164	1.11159	1.42175	0.272778
1.42218	12.3535	1.42234	1.16694	1.42211	1.11059	1.42221	0.273576
1.42268	12.4301	1.42285	1.17418	1.42261	1.11698	1.42273	0.274497
1.42317	12.4814	1.42335	1.18016	1.42313	1.12278	1.42323	0.275429
1.42366	12.5268	1.42386	1.18921	1.42365	1.12663	1.42373	0.276443
1.42419	12.5998	1.42436	1.1945	1.42412	1.12705	1.42424	0.277278
1.42467	12.6494	1.42488	1.2011	1.42462	1.13299	1.42473	0.278256
1.42517	12.7179	1.42535	1.20612	1.42512	1.13941	1.42526	0.279417
1.42565	12.7714	1.42588	1.21779	1.42566	1.14122	1.42575	0.280015
1.42619	12.8339	1.42636	1.22252	1.42614	1.14524	1.42625	0.281309
1.42664	12.8781	1.42685	1.22862	1.42662	1.14765	1.42676	0.282206
1.42718	12.9418	1.42735	1.23595	1.42714	1.15463	1.42725	0.283329
1.42769	12.9976	1.42789	1.24722	1.42763	1.15676	1.42775	0.284251
1.42817	13.057	1.42839	1.24912	1.42812	1.16164	1.42825	0.285385
1.42865	13.1677	1.42887	1.25948	1.42859	1.16474	1.42874	0.286243
1.42918	13.2158	1.42936	1.25962	1.42912	1.17134	1.42925	0.287059
1.42969	13.2805	1.42984	1.27154	1.42964	1.17431	1.42973	0.288379
1.43016	13.3326	1.43037	1.27722	1.43014	1.1774	1.43024	0.289197
1.4307	13.4055	1.43086	1.28952	1.43063	1.18196	1.43072	0.290365
1.43119	13.4673	1.43136	1.29133	1.43112	1.18688	1.43124	0.29112
1.43168	13.5421	1.43185	1.30193	1.43161	1.19132	1.43174	0.29243
1.43219	13.6009	1.43235	1.30531	1.43213	1.19488	1.43224	0.293352
1.43266	13.6514	1.43283	1.3113	1.43264	1.20045	1.43274	0.294393
1.4332	13.702	1.43339	1.32351	1.43314	1.20342	1.43325	0.295353
1.43369	13.7525	1.43387	1.33026	1.43364	1.20726	1.43377	0.296432
1.43418	13.8336	1.43437	1.33858	1.43413	1.21138	1.43425	0.297308
1.43468	13.9027	1.43488	1.34347	1.43466	1.21743	1.43476	0.298397
1.43518	13.9655	1.43536	1.34875	1.43513	1.22007	1.43527	0.299433
1.43571	14.0335	1.43587	1.36185	1.43563	1.22565	1.43577	0.300252
1.43619	14.0925	1.43636	1.36611	1.43613	1.22854	1.43627	0.301521
1.43666	14.1556	1.43687	1.37536	1.43662	1.23291	1.43677	0.30281
1.4372	14.2186	1.43738	1.38401	1.43712	1.23917	1.43724	0.303768
1.43769	14.2699	1.43789	1.39541	1.43762	1.24364	1.43774	0.304609
1.4382	14.3447	1.43834	1.39566	1.4381	1.24597	1.43822	0.305671
1.43868	14.3982	1.43883	1.40619	1.43864	1.25301	1.43873	0.306792
1.43917	14.4641	1.43938	1.41458	1.43911	1.25611	1.43921	0.30769
1.43971	14.5137	1.43989	1.42339	1.43962	1.25957	1.43971	0.308562
1.4402	14.7186	1.44039	1.42906	1.44013	1.26621	1.44022	0.310129
1.44067	14.8138	1.44088	1.43947	1.44062	1.26868	1.44073	0.311142
1.44118	14.8644	1.44135	1.44787	1.44116	1.27845	1.44124	0.312237
1.4417	14.912	1.44187	1.45604	1.44167	1.27959	1.44173	0.313067
1.44222	14.9579	1.44237	1.46551	1.44214	1.28316	1.44223	0.314413
1.44268	15.0266	1.44287	1.47503	1.44264	1.28798	1.44274	0.315346
1.44318	15.1059	1.44339	1.47989	1.44314	1.29428	1.44326	0.316367
1.4437	15.1728	1.44384	1.49782	1.44363	1.29812	1.44376	0.317592
1.44419	15.2323	1.44434	1.49787	1.44414	1.30442	1.44426	0.318438
1.4447	15.3097	1.44489	1.50747	1.44464	1.30923	1.44475	0.32028
1.4452	15.3505	1.44541	1.51582	1.44513	1.31377	1.44528	0.320901
1.44569	15.4226	1.44586	1.51909	1.44563	1.31999	1.44577	0.321553
1.4462	15.5057	1.44637	1.52874	1.44615	1.32308	1.44625	0.323322
1.4467	15.5534	1.44689	1.53957	1.44664	1.32593	1.44674	0.324351
1.4472	15.6312	1.44735	1.54507	1.44713	1.33287	1.44724	0.325479
1.44771	15.6973	1.44787	1.55621	1.44764	1.33846	1.44774	0.326401
1.44821	15.774	1.44837	1.56207	1.44812	1.34139	1.44821	0.32766
1.44867	15.8214	1.44887	1.57367	1.44862	1.34645	1.44873	0.329236
1.4492	15.9696	1.44936	1.58126	1.44915	1.35329	1.44924	0.330118
1.44971	16.0482	1.44988	1.59173	1.44966	1.35809	1.44973	0.330846
1.45022	16.1077	1.45041	1.60146	1.45015	1.36388	1.45023	0.33254
		1.45087	1.60802	1.45064	1.36626	1.45074	0.333432
		1.45134	1.61565	1.45115	1.37508	1.45126	0.334541
		1.45187	1.63045	1.45163	1.37678	1.45175	0.335641
		1.45235	1.63371	1.45216	1.38573	1.45226	0.336841
		1.45289	1.65285	1.45264	1.38737	1.45275	0.338167
		1.45337	1.6539	1.4531	1.39303	1.45327	0.339346
		1.45385	1.66774	1.4536	1.4028	1.45371	0.339653
		1.45432	1.67384	1.45411	1.40393	1.4542	0.341283
		1.45484	1.67853	1.45456	1.40524	1.45471	0.343076
		1.45536	1.69503	1.45509	1.41599	1.45521	0.344409
		1.45585	1.70429	1.45561	1.41972	1.4557	0.345174
		1.45634	1.71972	1.45608	1.42518	1.45617	0.346078
		1.45683	1.71904	1.45658	1.42991	1.4567	0.348223
		1.4573	1.72463	1.4571	1.43709	1.45721	0.348886
		1.45786	1.74279	1.45762	1.44269	1.45771	0.349909
		1.45834	1.74956	1.4581	1.44547	1.4582	0.351351
		1.45884	1.76258	1.45862	1.45279	1.45871	0.352571
		1.45936	1.77053	1.45911	1.45763	1.45922	0.353813
		1.4599	1.78482	1.45962	1.46444	1.45972	0.355129
		1.46033	1.78221	1.46011	1.46973	1.46024	0.35625
		1.46084	1.79823	1.46059	1.47419	1.46073	0.357503
		1.46134	1.80475	1.46112	1.48163	1.46124	0.358865
		1.46185	1.81714	1.46161	1.48699	1.46175	0.360198
		1.46235	1.82507	1.46209	1.49066	1.46223	0.361045
		1.46284	1.83929	1.46259	1.49741	1.46275	0.362391
		1.46339	1.8504	1.46311	1.5055	1.46324	0.363602
		1.46386	1.85448	1.46361	1.50827	1.46372	0.365174
		1.46435	1.86568	1.4641	1.51479	1.46423	0.365992
		1.46482	1.87605	1.46461	1.52139	1.4647	0.367738
		1.46535	1.88936	1.46511	1.52458	1.4652	0.368726
		1.46585	1.89913	1.46562	1.53336	1.46571	0.370094
		1.46637	1.90934	1.46611	1.53863	1.46621	0.371407
		1.46684	1.91944	1.46662	1.54356	1.46671	0.372823
		1.46734	1.93099	1.46711	1.55059	1.46722	0.374353
		1.46789	1.94844	1.46762	1.55765	1.46772	0.375352
		1.46838	1.95043	1.46812	1.56042	1.46823	0.376627
		1.46884	1.96207	1.46862	1.57103	1.46872	0.377781
		1.46934	1.97267	1.46917	1.57389	1.46924	0.379293
		1.46984	1.98531	1.46959	1.57835	1.46973	0.380198
		1.47035	1.99465	1.47007	1.58622	1.47023	0.381953
		1.47087	2.00851	1.47062	1.5943	1.47074	0.383084
		1.47134	2.01389	1.47107	1.59767	1.47124	0.384126
		1.47182	2.0312	1.47162	1.60991	1.47173	0.385688
		1.47237	2.03966	1.47208	1.61087	1.47222	0.386645
		1.47285	2.05118	1.4726	1.61738	1.47273	0.388559
		1.47332	2.05846	1.47311	1.63003	1.47321	0.389754
		1.47386	2.07746	1.47362	1.63092	1.4737	0.391156
		1.47437	2.08832	1.47409	1.63612	1.4742	0.392273
		1.47485	2.09729	1.47462	1.64669	1.47471	0.393886
		1.47528	2.10225	1.4751	1.64761	1.47521	0.395064
		1.47587	2.12461	1.47563	1.66049	1.47572	0.396609
		1.47638	2.13387	1.47614	1.66388	1.47623	0.398063
		1.47685	2.14107	1.47659	1.6673	1.47674	0.400006
		1.47731	2.15394	1.47715	1.67935	1.47726	0.400881
		1.47791	2.17508	1.47763	1.68372	1.47776	0.402247
		1.47839	2.17414	1.47812	1.68964	1.47824	0.403786
		1.47887	2.19461	1.47862	1.69755	1.47877	0.405213
		1.47937	2.20521	1.47911	1.70481	1.47926	0.406426
		1.47991	2.21449	1.47962	1.71232	1.47975	0.407767
		1.48038	2.22342	1.48012	1.71753	1.48024	0.408752
		1.48082	2.23492	1.48059	1.72604	1.48076	0.410674
		1.48138	2.25493	1.48111	1.7321	1.48125	0.412009
		1.48187	2.26883	1.48163	1.73783	1.48173	0.413
		1.48239	2.27453	1.48213	1.74999	1.48222	0.414613
		1.48283	2.28328	1.4826	1.74996	1.48272	0.416365
		1.48335	2.30332	1.48315	1.76305	1.48324	0.418352
		1.48388	2.31632	1.48361	1.76433	1.48372	0.419031
		1.48437	2.32416	1.48413	1.77486	1.48422	0.420559
		1.48486	2.34078	1.48463	1.78158	1.48474	0.422245
		1.48538	2.35082	1.48515	1.78801	1.48523	0.423324
		1.48588	2.36462	1.48565	1.79796	1.48574	0.424802
		1.48636	2.3735	1.48614	1.80401	1.48623	0.426409
		1.48686	2.38983	1.48663	1.81017	1.48674	0.427714
		1.48738	2.4028	1.48714	1.81909	1.48724	0.42932
		1.48787	2.41643	1.48761	1.82654	1.48774	0.43034
		1.48837	2.42613	1.48812	1.83368	1.48823	0.432262
		1.48887	2.4415	1.48857	1.83948	1.48874	0.433566
		1.48936	2.45249	1.48909	1.85181	1.48924	0.435068
		1.48987	2.4693	1.48959	1.85634	1.48973	0.436673
		1.49037	2.47546	1.49011	1.86569	1.49021	0.438509
		1.49091	2.49813	1.49061	1.87298	1.4907	0.439643
		1.4914	2.50486	1.49112	1.8832	1.49123	0.441398
		1.49183	2.51303	1.49164	1.88911	1.49171	0.442245
		1.49239	2.5392	1.49213	1.89562	1.49221	0.444002
		1.4929	2.54866	1.49264	1.90036	1.49273	0.445646
		1.49333	2.55709	1.49315	1.90584	1.49324	0.446951
		1.49385	2.57323	1.49366	1.91741	1.49374	0.448063
		1.49434	2.58523	1.49409	1.91507	1.49422	0.450107
		1.49486	2.59886	1.49461	1.92891	1.49474	0.451578
		1.49539	2.61407	1.49511	1.93498	1.49523	0.452653
		1.49592	2.63728	1.49562	1.94836	1.49574	0.454606
		1.49643	2.64573	1.49609	1.95136	1.49624	0.455893
		1.49693	2.65987	1.49661	1.96133	1.49674	0.457724
		1.49735	2.66687	1.49712	1.97218	1.49724	0.459228
		1.49789	2.6879	1.49762	1.97709	1.49775	0.460688
		1.49841	2.70327	1.49812	1.97928	1.49823	0.462632
		1.4989	2.71474	1.49862	1.99063	1.49871	0.46417
		1.49941	2.73482	1.4991	1.9964	1.49922	0.466008
		1.49982	2.74264	1.49958	2.00519	1.49971	0.467309
		1.50039	2.75851	1.50013	2.0151	1.50023	0.468682
		1.5009	2.77682	1.50064	2.02338	1.50071	0.470409
		1.50136	2.78406	1.50111	2.0311	1.50122	0.471673
		1.50189	2.80801	1.50162	2.03805	1.50173	0.473476
		1.50238	2.81472	1.50214	2.05268	1.50222	0.474871
		1.50287	2.8225	1.50264	2.05736	1.50273	0.476602
		1.50341	2.84243	1.50317	2.06694	1.50323	0.477875
		1.50389	2.85311	1.50366	2.0722	1.50373	0.479477
		1.50442	2.87393	1.5041	2.08513	1.50423	0.4814
		1.50492	2.88422	1.50462	2.09152	1.50474	0.483086
		1.5054	2.90024	1.50514	2.09832	1.50526	0.484844
		1.5059	2.91354	1.50557	2.1079	1.50574	0.485432
		1.50634	2.92246	1.50611	2.12254	1.50622	0.487418
		1.50687	2.94753	1.50662	2.12633	1.50673	0.489163
		1.5074	2.96006	1.50714	2.14351	1.50724	0.491022
		1.50788	2.97008	1.50763	2.1491	1.50771	0.492983
		1.50838	2.99257	1.50813	2.15942	1.50822	0.494034
		1.50887	3.001	1.50859	2.17101	1.50873	0.496296
		1.50938	3.02755	1.50912	2.17946	1.50921	0.497563
		1.50999	3.04796	1.50963	2.18624	1.50972	0.499
		1.51036	3.05226	1.51016	2.20066	1.51022	0.500557
		1.51086	3.06833	1.51065	2.20458	1.51072	0.502401
		1.51137	3.08653	1.51114	2.21175	1.51122	0.504104
		1.51191	3.09931	1.51163	2.22222	1.51173	0.505723
		1.51234	3.11202	1.51212	2.23383	1.51224	0.507313
		1.5129	3.13391	1.51266	2.24456	1.51273	0.508878
		1.51342	3.14967	1.51313	2.2509	1.51327	0.510312
		1.5139	3.1625	1.51369	2.26467	1.51374	0.511789
		1.51438	3.17821	1.51411	2.26804	1.51424	0.514625
		1.51488	3.19228	1.51459	2.27879	1.51475	0.51548
		1.5154	3.21349	1.5151	2.29146	1.51524	0.517394
		1.5159	3.22715	1.51565	2.31052	1.51574	0.519311
		1.51641	3.24281	1.5161	2.30567	1.5162	0.520561
		1.51692	3.26375	1.51662	2.3256	1.51671	0.522725
		1.51738	3.27409	1.51711	2.33213	1.51721	0.524181
		1.51785	3.28893	1.51762	2.34291	1.5177	0.525498
		1.51835	3.30155	1.51817	2.36024	1.51822	0.527906
		1.51895	3.33151	1.51867	2.36473	1.51872	0.529393
		1.51938	3.33625	1.51913	2.36827	1.51923	0.531192
		1.51988	3.35529	1.51964	2.38452	1.51972	0.532452
		1.52039	3.38055	1.52013	2.39205	1.52024	0.534619
		1.52092	3.39936	1.52056	2.39963	1.52073	0.536939
		1.5214	3.40935	1.52113	2.42092	1.52124	0.538188
		1.52186	3.4292	1.52153	2.42665	1.52171	0.539837
		1.52237	3.44536	1.52207	2.44178	1.52221	0.541032
		1.52285	3.46252	1.52259	2.45786	1.5227	0.542577
		1.52335	3.48169	1.52315	2.46768	1.52322	0.544887
		1.52384	3.49673	1.52361	2.47472	1.5237	0.546915
		1.52437	3.51726	1.52409	2.48673	1.52418	0.54804
		1.52486	3.52872	1.52458	2.49291	1.52468	0.549868
		1.52529	3.54291	1.52507	2.508	1.52519	0.551845
		1.52594	3.58065	1.52563	2.52532	1.52571	0.553444
		1.52636	3.58486	1.52604	2.52423	1.52618	0.555239
		1.52685	3.60385	1.5266	2.54946	1.52669	0.557293
		1.52734	3.62305	1.52713	2.55958	1.5272	0.558867
		1.52782	3.63677	1.52759	2.56579	1.52771	0.560395
		1.52837	3.65898	1.52815	2.58202	1.5282	0.562237
		1.52885	3.67109	1.52857	2.58217	1.5287	0.564411
		1.5294	3.70123	1.52909	2.60036	1.52922	0.566111
		1.5299	3.71558	1.52966	2.6171	1.52973	0.56822
		1.53037	3.73139	1.53007	2.62087	1.53022	0.569395
		1.53086	3.7496	1.53056	2.63446	1.53072	0.571772
		1.53132	3.76461	1.53113	2.65196	1.53123	0.572837
		1.53188	3.79001	1.53159	2.66123	1.53172	0.575061
		1.5324	3.80917	1.53211	2.67117	1.53222	0.576847
		1.53286	3.82135	1.53262	2.68929	1.5327	0.578713
		1.53333	3.83442	1.53308	2.69682	1.53321	0.580451
		1.53384	3.8564	1.53358	2.71016	1.5337	0.582338
		1.53439	3.88185	1.53409	2.72199	1.53417	0.58424
		1.53491	3.90272	1.5346	2.73294	1.53468	0.585433
		1.5354	3.91765	1.53511	2.75214	1.53519	0.587846
		1.53585	3.93477	1.5356	2.75734	1.53569	0.589768
		1.53638	3.95044	1.53611	2.77736	1.5362	0.591421
		1.53688	3.97098	1.53659	2.78379	1.5367	0.59406
		1.53734	3.98758	1.53709	2.79906	1.53722	0.595191
		1.5379	4.01361	1.53761	2.81028	1.53773	0.597384
		1.53832	4.02241	1.53812	2.83098	1.53822	0.598761
		1.53889	4.05388	1.53865	2.84051	1.53872	0.601254
		1.53936	4.06574	1.53908	2.8485	1.5392	0.60228
		1.53988	4.08934	1.5396	2.86862	1.53969	0.604101
		1.5404	4.10689	1.54014	2.88304	1.54021	0.607042
		1.54088	4.12643	1.54062	2.8927	1.54073	0.608566
		1.54137	4.14558	1.54111	2.9099	1.54123	0.610433
		1.54187	4.16537	1.54162	2.92157	1.5417	0.6117
		1.54236	4.18797	1.54207	2.92486	1.54222	0.613798
		1.54285	4.20371	1.54259	2.9489	1.54272	0.6158
		1.54342	4.23459	1.54319	2.96704	1.5432	0.61803
		1.54388	4.24823	1.54363	2.97457	1.5437	0.619346
		1.54433	4.26931	1.54409	2.98542	1.54421	0.621869
		1.54487	4.28813	1.54461	3.00373	1.54471	0.623383
		1.54541	4.31894	1.54515	3.01883	1.54521	0.625187
		1.54593	4.33712	1.54566	3.03032	1.54573	0.62774
		1.54634	4.34335	1.54609	3.04028	1.5462	0.628896
		1.54688	4.37378	1.54664	3.06005	1.54672	0.630596
		1.54739	4.39448	1.54708	3.07171	1.54724	0.633026
		1.54786	4.40818	1.54758	3.08444	1.54773	0.63514
		1.54835	4.42898	1.5481	3.10784	1.54824	0.636902
		1.54893	4.46567	1.54859	3.11776	1.54874	0.638545
		1.54942	4.47662	1.5491	3.13495	1.54924	0.641282
		1.5499	4.49795	1.54959	3.14813	1.54972	0.642648
		1.55035	4.51145	1.55009	3.16347	1.5502	0.644871
		1.55088	4.54189	1.55062	3.18287	1.55069	0.646238
		1.55136	4.55892	1.5511	3.19187	1.55122	0.64866
		1.55185	4.63505	1.5516	3.21209	1.55168	0.650316
		1.55243	4.7096	1.55206	3.2188	1.5522	0.651974
		1.5529	4.6945	1.5526	3.24102	1.5527	0.654073
		1.5534	4.73215	1.55314	3.26269	1.55322	0.656792
		1.55386	4.73877	1.55363	3.27191	1.5537	0.657526
		1.55443	4.76695	1.55411	3.2871	1.55421	0.660588
		1.55489	4.7806	1.55463	3.30682	1.55473	0.662229
		1.5554	4.80415	1.55516	3.31968	1.55522	0.663918
		1.55591	4.82603	1.55559	3.33153	1.55576	0.666091
		1.55639	4.84263	1.55611	3.34774	1.55625	0.667736
		1.5569	4.87375	1.55662	3.36925	1.55676	0.669639
		1.55738	4.88844	1.55711	3.38555	1.5573	0.672534
		1.55791	4.91041	1.55764	3.40148	1.55777	0.673795
		1.55841	4.93473	1.55816	3.42403	1.55825	0.675674
		1.55893	4.96298	1.55858	3.42936	1.55877	0.677906
		1.55936	4.97338	1.55918	3.4631	1.55927	0.681004
		1.55985	4.9983	1.55963	3.46497	1.55975	0.682528
		1.5604	5.02537	1.56014	3.4831	1.56026	0.684107
		1.56088	5.04551	1.56068	3.51219	1.56073	0.68605
		1.56138	5.06892	1.56115	3.516	1.56125	0.68827
		1.56192	5.09498	1.56165	3.53565	1.56174	0.690053
		1.56242	5.11789	1.56218	3.56321	1.56224	0.692326
		1.5629	5.1361	1.56266	3.57466	1.56275	0.693982
		1.56339	5.16373	1.56314	3.59263	1.56327	0.697044
		1.56387	5.18309	1.56368	3.61164	1.56377	0.698646
		1.5644	5.208	1.56412	3.6239	1.56425	0.699867
		1.56492	5.23596	1.56463	3.64418	1.56478	0.702916
		1.56541	5.26124	1.56513	3.66175	1.56529	0.704591
		1.56593	5.28552	1.5656	3.67999	1.56578	0.706217
		1.56638	5.30567	1.56617	3.70956	1.56628	0.708355
		1.56687	5.32456	1.56665	3.7232	1.56677	0.710496
		1.56742	5.35368	1.56712	3.74503	1.56726	0.712952
		1.56792	5.37634	1.56767	3.76457	1.56777	0.714695
		1.56842	5.40089	1.56811	3.7792	1.56824	0.717239
		1.56889	5.42039	1.56858	3.79143	1.56875	0.7191
		1.56943	5.45002	1.56916	3.82108	1.56924	0.72114
		1.5699	5.47248	1.56959	3.83277	1.56973	0.722854
		1.57038	5.48916	1.57012	3.85015	1.57024	0.724727
		1.57091	5.51619	1.57068	3.88089	1.57076	0.727747
		1.57144	5.54642	1.57116	3.88986	1.57124	0.729269
		1.57189	5.56265	1.57158	3.89997	1.57176	0.730885
		1.5724	5.59186	1.57216	3.93205	1.57228	0.734028
		1.57289	5.61413	1.57265	3.94564	1.57277	0.735254
		1.57346	5.64911	1.57309	3.96122	1.57329	0.737906
		1.57386	5.65993	1.57369	3.99171	1.57377	0.739572
		1.57443	5.69477	1.57414	4.00526	1.57429	0.742357
		1.57491	5.71805	1.57466	4.02801	1.57476	0.744197
		1.57538	5.73447	1.57518	4.04667	1.57526	0.746172
		1.57597	5.77475	1.57564	4.06812	1.57578	0.748232
		1.5764	5.79032	1.57616	4.089	1.57625	0.750581
		1.57692	5.82019	1.57665	4.10323	1.57674	0.752505
		1.5774	5.8434	1.5771	4.12417	1.57724	0.754198
		1.57789	5.86343	1.57762	4.15001	1.57775	0.757723
		1.57841	5.89303	1.57811	4.16552	1.57823	0.758518
		1.57891	5.92183	1.57862	4.19259	1.57876	0.761765
		1.57939	5.93725	1.57914	4.20434	1.57924	0.763086
		1.57992	5.97471	1.57964	4.2214	1.57975	0.765946
		1.5804	5.99309	1.58018	4.25052	1.58026	0.767384
		1.58093	6.02629	1.58069	4.2626	1.58077	0.770044
		1.58142	6.0483	1.5811	4.32678	1.58126	0.772334
		1.58193	6.07244	1.58167	4.37696	1.58178	0.774434
		1.58241	6.09352	1.5822	4.38503	1.58226	0.775746
		1.58291	6.12044	1.58261	4.39237	1.58278	0.779891
		1.58342	6.15047	1.58312	4.41352	1.58326	0.77985
		1.58393	6.1814	1.58367	4.43507	1.58377	0.783332
		1.58441	6.20215	1.58409	4.45305	1.58425	0.785025
		1.58491	6.22852	1.58467	4.47429	1.58473	0.787727
		1.58542	6.25481	1.58513	4.49081	1.58526	0.789741
		1.5859	6.28254	1.58559	4.50819	1.58574	0.791606
		1.58641	6.29627	1.58619	4.54264	1.58622	0.793475
		1.58693	6.33055	1.58665	4.55182	1.58673	0.796283
		1.5874	6.35593	1.58718	4.58503	1.58726	0.798971
		1.58791	6.3828	1.58768	4.58774	1.58774	0.801192
		1.58842	6.41031	1.58817	4.59577	1.58825	0.803062
		1.58892	6.44076	1.58864	4.65019	1.58875	0.805449
		1.5894	6.4652	1.58917	4.67424	1.58927	0.807444
		1.58987	6.48727	1.58966	4.70177	1.58974	0.809347
		1.59039	6.51937	1.59007	4.70254	1.59022	0.811605
		1.59088	6.54628	1.59061	4.73426	1.59075	0.813605
		1.59137	6.56598	1.59114	4.76205	1.59124	0.816619
		1.59189	6.59367	1.59165	4.78629	1.59174	0.818706
		1.59238	6.61261	1.59213	4.80966	1.59223	0.821066
		1.59287	6.64233	1.59259	4.82485	1.59275	0.823887
		1.59341	6.67442	1.59309	4.85165	1.59323	0.825251
		1.59387	6.69918	1.59357	4.86966	1.59373	0.828163
		1.59436	6.7225	1.5941	4.89826	1.59419	0.830799
		1.59488	6.75345	1.59461	4.92745	1.59472	0.832644
		1.59535	6.77577	1.59513	4.95124	1.59523	0.835735
		1.59586	6.80608	1.59562	4.96912	1.59572	0.837028
		1.59639	6.83732	1.5961	4.99464	1.59622	0.839823
		1.5969	6.86376	1.59668	5.03289	1.59671	0.841647
		1.5974	6.89438	1.59713	5.04389	1.59723	0.844089
		1.59788	6.91701	1.59763	5.06806	1.59773	0.847162
		1.59839	6.95058	1.59808	5.09062	1.59824	0.848951
		1.59888	6.9779	1.59861	5.11553	1.59875	0.852179
		1.59938	7.00474	1.59913	5.14884	1.59925	0.85363
		1.5999	7.03421	1.5996	5.16383	1.59973	0.856283
		1.60039	7.06064	1.60014	5.19669	1.60023	0.858867
		1.60089	7.0854	1.60063	5.21953	1.60076	0.861497
		1.60138	7.11159	1.60114	5.24719	1.60122	0.86265
		1.6019	7.14579	1.60164	5.27055	1.60173	0.865583
		1.60238	7.17063	1.60208	5.29159	1.60223	0.867196
		1.60288	7.20097	1.60262	5.32016	1.60273	0.871109
		1.60338	7.23146	1.60312	5.35168	1.60324	0.872907
		1.60389	7.26323	1.6036	5.37257	1.60371	0.874792
		1.60438	7.29122	1.60414	5.40178	1.60425	0.878359
		1.60488	7.32275	1.6046	5.41965	1.60473	0.881261
		1.60539	7.3533	1.60515	5.44752	1.60524	0.882804
		1.60591	7.38266	1.60566	5.47491	1.60576	0.884337
		1.6064	7.40903	1.60617	5.50076	1.60625	0.888056
		1.60688	7.43745	1.60664	5.52337	1.60674	0.890021
		1.60741	7.47254	1.60717	5.55203	1.60726	0.89199
		1.6079	7.50497	1.60765	5.58323	1.60774	0.894435
		1.6084	7.52948	1.60812	5.61015	1.60826	0.897057
		1.60888	7.5543	1.60866	5.6398	1.60876	0.899682
		1.60939	7.59582	1.60909	5.65699	1.60926	0.902763
		1.60986	7.61694	1.60957	5.687	1.60975	0.903663
		1.61037	7.64586	1.61009	5.71023	1.61026	0.906961
		1.61093	7.68941	1.61066	5.7474	1.61075	0.909279
		1.6114	7.71923	1.61112	5.77071	1.61125	0.913046
		1.6119	7.74128	1.61161	5.79952	1.61173	0.913394
		1.61236	7.76355	1.61215	5.82999	1.6122	0.916861
		1.61289	7.80861	1.61267	5.86192	1.61273	0.919171
		1.61338	7.83884	1.61311	5.88085	1.61326	0.921555
		1.61389	7.87057	1.61364	5.91647	1.61372	0.924187
		1.61437	7.89139	1.61416	5.94761	1.61422	0.926834
		1.6149	7.92583	1.61461	5.96797	1.61473	0.929149
		1.6154	7.95746	1.61515	6.00104	1.61524	0.93117
		1.61591	7.98747	1.61566	6.03017	1.61577	0.93386
		1.61641	8.02329	1.61614	6.04983	1.61627	0.937604
		1.6169	8.05372	1.61661	6.07801	1.61675	0.939596
		1.61739	8.08715	1.61712	6.11353	1.61726	0.94281
		1.61789	8.11367	1.61763	6.14376	1.61774	0.944085
		1.6184	8.15084	1.61809	6.17047	1.61824	0.947342
		1.61889	8.18287	1.61863	6.20271	1.61876	0.949918
		1.61938	8.21526	1.61909	6.22887	1.61925	0.9517
		1.61991	8.24276	1.61963	6.26213	1.61974	0.956341
		1.62038	8.26746	1.6201	6.28132	1.62019	0.95686
		1.6209	8.30549	1.62061	6.31789	1.62072	0.960206
		1.6214	8.34089	1.6211	6.34103	1.62127	0.96295
		1.6219	8.37658	1.62169	6.39163	1.62176	0.965264
		1.62239	8.39778	1.62214	6.40935	1.62222	0.968217
		1.62291	8.44005	1.62264	6.43745	1.62275	0.970304
		1.6234	8.47496	1.62317	6.47453	1.62326	0.972737
		1.62391	8.5264	1.62359	6.49877	1.62375	0.975462
		1.6244	8.55245	1.62422	6.54748	1.62424	0.97797
		1.6249	8.58815	1.62461	6.55742	1.62474	0.980915
		1.6254	8.61519	1.62515	6.59023	1.62526	0.983525
		1.62592	8.65062	1.62563	6.6184	1.62575	0.986429
		1.6264	8.67701	1.62611	6.65006	1.62624	0.989359
		1.62691	8.7118	1.62661	6.68476	1.62674	0.992321
		1.6274	8.74413	1.6271	6.71535	1.62724	0.994617
		1.6279	8.77965	1.62761	6.75018	1.62772	0.996461
		1.6284	8.81346	1.62814	6.78643	1.62821	1.00002
		1.62889	8.83311	1.62864	6.81708	1.62874	1.00265
		1.62939	8.86786	1.6291	6.83944	1.62923	1.00568
		1.6299	8.90668	1.62963	6.88293	1.62972	1.00759
		1.63039	8.9422	1.63013	6.90868	1.63022	1.00996
		1.63091	8.97749	1.63067	6.95307	1.63071	1.01259
		1.6314	8.98812	1.63109	6.96634	1.63124	1.01629
		1.63191	9.03079	1.63163	7.0039	1.63172	1.01818
		1.6324	9.05467	1.63213	7.04308	1.63223	1.02057
		1.6329	9.08006	1.63267	7.08782	1.63273	1.02498
		1.63342	9.11985	1.63314	7.11524	1.63325	1.02688
		1.63392	9.15655	1.63365	7.1459	1.63376	1.02983
		1.6344	9.18897	1.63414	7.17544	1.63423	1.03156
		1.63491	9.21543	1.6346	7.20411	1.63477	1.03626
		1.63542	9.24899	1.63514	7.24693	1.63525	1.0383
		1.63591	9.27756	1.63563	7.2756	1.63574	1.04026
		1.6364	9.30602	1.63612	7.30463	1.63624	1.04309
		1.63691	9.34781	1.63663	7.33822	1.63676	1.04738
		1.63742	9.385	1.63711	7.37434	1.63724	1.0492
		1.63792	9.41977	1.63764	7.41221	1.63774	1.05238
		1.63838	9.44499	1.63815	7.44631	1.63823	1.05486
		1.6389	9.49264	1.63861	7.46975	1.63873	1.05789
		1.63942	9.52962	1.63914	7.50503	1.63924	1.06214
		1.63991	9.57313	1.63962	7.53398	1.63975	1.06402
		1.64042	9.60475	1.64015	7.57128	1.64024	1.06669
		1.64091	9.64458	1.64066	7.61023	1.64073	1.06884
		1.6414	9.66661	1.64114	7.64383	1.64125	1.07256
		1.64192	9.70632	1.64162	7.67937	1.64178	1.07627
		1.64241	9.74314	1.64216	7.71799	1.64226	1.07755
		1.64293	9.79078	1.64265	7.75506	1.64277	1.08173
		1.64339	9.81355	1.64315	7.7869	1.64321	1.08299
		1.6439	9.85202	1.64365	7.81167	1.64376	1.08572
		1.64442	9.89487	1.64414	7.86274	1.64422	1.08906
		1.6449	9.93007	1.6446	7.89836	1.64475	1.09251
		1.64541	9.96673	1.64512	7.93802	1.64529	1.09657
		1.64593	10.0058	1.64561	7.96775	1.64571	1.09798
		1.64639	10.039	1.64613	8.00785	1.64624	1.10101
		1.64689	10.0709	1.64662	8.03851	1.6467	1.10469
		1.64741	10.1081	1.64713	8.08081	1.64725	1.10724
		1.64793	10.1472	1.64762	8.11371	1.64772	1.1106
		1.64839	10.1823	1.64814	8.15659	1.64823	1.11315
		1.64891	10.2202	1.64862	8.18297	1.64873	1.11666
		1.64939	10.2447	1.64918	8.23144	1.64925	1.11985
		1.64993	10.2783	1.64961	8.25448	1.64974	1.12318
		1.65042	10.3176	1.65017	8.30247	1.65029	1.12607
		1.65093	10.3658	1.65066	8.32932	1.65074	1.12845
		1.65142	10.4053	1.65111	8.36103	1.65126	1.13166
		1.65192	10.4536	1.65165	8.40861	1.65176	1.13485
		1.65239	10.4715	1.65211	8.43985	1.6523	1.13896
		1.65293	10.5187	1.65263	8.46882	1.65274	1.13977
		1.65343	10.5714	1.65317	8.51218	1.65329	1.14423
		1.65393	10.598	1.65363	8.54738	1.65372	1.14601
		1.65443	10.6302	1.65414	8.58557	1.65427	1.15067
		1.65491	10.6602	1.65463	8.62329	1.65476	1.15293
		1.65539	10.7	1.65513	8.6587	1.65522	1.15434
		1.65592	10.7494	1.65562	8.69922	1.65577	1.15995
		1.65643	10.7907	1.65612	8.73424	1.65621	1.16151
		1.65691	10.8268	1.65663	8.77327	1.65673	1.16401
		1.65739	10.8673	1.65715	8.81807	1.65726	1.16922
		1.65789	10.9092	1.65761	8.8425	1.65773	1.17151
		1.6584	10.9459	1.65812	8.88592	1.65821	1.17411
		1.65888	10.9818	1.65861	8.92518	1.65872	1.17785
		1.65937	11.0209	1.65913	8.9696	1.65923	1.18083
		1.65989	11.0594	1.65962	9.02529	1.65977	1.18625
		1.66037	11.0955	1.66008	9.07408	1.6602	1.18623
		1.66087	11.1061	1.6606	9.11255	1.6607	1.18987
		1.66139	11.1446	1.66113	9.14944	1.66125	1.19449
		1.66188	11.1818	1.66162	9.18571	1.6617	1.19716
		1.66237	11.2091	1.66209	9.22975	1.66226	1.20073
		1.66288	11.247	1.66257	9.26547	1.66266	1.20349
		1.66339	11.2997	1.66313	9.30957	1.66322	1.20773
		1.66391	11.348	1.66358	9.33368	1.66374	1.21013
		1.66437	11.3759	1.66412	9.38405	1.66423	1.21482
		1.66492	11.4277	1.66461	9.42414	1.66467	1.21561
		1.66539	11.4572	1.66513	9.46329	1.66521	1.2211
		1.6659	11.5041	1.66563	9.49393	1.66576	1.22385
		1.66638	11.5329	1.66614	9.54384	1.66616	1.22545
		1.66691	11.5773	1.66662	9.58431	1.66673	1.23103
		1.66739	11.6169	1.66715	9.62819	1.66726	1.2338
		1.6679	11.6579	1.66764	9.66681	1.66771	1.23764
		1.66838	11.6861	1.66811	9.7077	1.66824	1.24111
		1.66891	11.73	1.6686	9.74959	1.66874	1.24403
		1.66942	11.8039	1.66913	9.80864	1.66927	1.24815
		1.66991	11.8291	1.66965	9.84984	1.66974	1.25079
		1.6704	11.8664	1.67012	9.89285	1.67028	1.25555
		1.67091	11.9182			1.67075	1.25742
		1.67141	11.9492			1.67122	1.26005
		1.67189	11.9888			1.67173	1.26532
		1.6724	12.029			1.67223	1.26689
		1.67289	12.062			1.67274	1.27205
		1.67342	12.1066			1.67325	1.274
		1.67389	12.1467			1.67369	1.27881
		1.67439	12.1934			1.67429	1.28228
		1.6749	12.2487			1.6747	1.28567
		1.67542	12.2802			1.67522	1.28784
		1.67589	12.313			1.67574	1.29057
		1.6764	12.3508			1.67631	1.29854
		1.67691	12.4047			1.67672	1.2985
		1.67741	12.6711			1.67727	1.30231
		1.6779	12.6762			1.6777	1.30769
		1.6784	12.6873			1.67826	1.31006
		1.6789	12.726			1.67879	1.31561
		1.6794	12.7652			1.67917	1.31516
		1.67989	12.8027			1.67978	1.32172
		1.6804	12.8548			1.68024	1.32417
		1.68089	12.8941			1.68073	1.32874
		1.68138	12.9371			1.68118	1.33099
		1.6819	12.9838			1.68174	1.33773
		1.68239	13.0227			1.68222	1.33905
		1.68291	13.0748			1.68272	1.34123
		1.68339	13.1094			1.68323	1.34773
		1.68392	13.1498			1.68375	1.35009
		1.6844	13.2007			1.68425	1.3545
		1.6849	13.2457			1.68473	1.35759
		1.68541	13.2947			1.68525	1.36225
		1.68592	13.326			1.68578	1.36597
		1.68641	13.371			1.68621	1.36877
		1.68691	13.4106			1.68681	1.37479
		1.68741	13.4556			1.68722	1.37771
		1.68793	13.4979			1.68776	1.38193
		1.68841	13.5278			1.6882	1.3843
		1.6889	13.5679			1.68867	1.38656
		1.68939	13.6146			1.68926	1.39529
		1.68992	13.6604			1.68974	1.39733
		1.6904	13.6974			1.69027	1.40013
		1.69093	13.7274			1.69068	1.40208
		1.69139	13.7535			1.69127	1.40967
		1.69192	13.8148			1.69177	1.41218
		1.69241	13.8347			1.69224	1.41612
		1.6929	13.8739			1.69278	1.4224
		1.69341	13.9466			1.69327	1.42487
		1.69392	13.998			1.69378	1.42842
		1.69444	14.0493			1.69428	1.4328
		1.69491	14.0841			1.69472	1.43619
		1.69542	14.1121			1.69528	1.44041
		1.69592	14.1526			1.69578	1.44527
		1.69642	14.2018			1.69633	1.45076
		1.69693	14.2422			1.6967	1.4523
		1.69742	14.2812			1.69728	1.45669
		1.69792	14.3246			1.69772	1.46111
		1.6984	14.3592			1.69827	1.46646
		1.69893	14.4283			1.69878	1.47061
		1.69942	14.4695			1.69921	1.47282
		1.69992	14.5202			1.6998	1.48036
		1.70042	14.562			1.70019	1.47948

## Sheet: Figure_6(b)
Pt/C		Ganma-MnO2		Ir/C
Log(Current Density / A cm^(-2))	Potential / V vs. SHE	Log(Current Density / A cm^(-2))	Potential / V vs. SHE	Log(Current Density / A cm^(-2))	Potential / V vs. SHE
-3.55719	1.42082	-3.60451	1.42046	-3.5052	1.22082
-3.72102	1.39576	-3.74598	1.39551	-3.7362	1.1959
-3.87089	1.37071	-3.87211	1.3704	-3.97718	1.17085
-4.01365	1.34581	-3.9873	1.34547	-4.21813	1.1458
-4.15521	1.32077	-4.09375	1.32049	-4.46281	1.12077
-4.29257	1.29579	-4.19387	1.29557
-4.40915	1.2708	-4.2888	1.27045
-4.51717	1.24583

## Sheet: Figure_7
Alfa-MnO2		Beta-MnO2		Delta-MnO2		Ganma-MnO2
Potential / V vs. SHE	Current Density / mA cm^(-2)	Potential / V vs. SHE	Current Density / mA cm^(-2)	Potential / V vs. SHE	Current Density / mA cm^(-2)	Potential / V vs. SHE	Current Density / mA cm^(-2)
1.32587	0.0258374	1.32023	0.00405878	1.36419	0.0028632	1.47081	0.00333355
1.32675	0.0705635	1.32087	0.0125189	1.36507	0.0116119	1.4716	0.0136658
1.32781	0.10934	1.32189	0.0219769	1.3661	0.0204754	1.4729	0.028015
1.32887	0.136331	1.32314	0.0287335	1.36713	0.0282905	1.47428	0.0399561
1.32989	0.155184	1.32433	0.0304719	1.36814	0.0355945	1.47553	0.0482999
1.33086	0.170078	1.32541	0.0297222	1.36915	0.0419565	1.47668	0.0541207
1.33183	0.182684	1.32642	0.0288723	1.37015	0.0485176	1.47777	0.0584678
1.33282	0.193784	1.32741	0.0287167	1.37115	0.0543682	1.47885	0.0619298
1.33383	0.203888	1.32839	0.0290461	1.37216	0.0598373	1.47994	0.0648312
1.33485	0.214763	1.32937	0.0295496	1.37316	0.0654833	1.48102	0.0672991
1.33586	0.225365	1.33035	0.0300415	1.37417	0.0705692	1.48206	0.0693732
1.33687	0.234051	1.33136	0.0305604	1.37516	0.0755616	1.48309	0.0711435
1.33788	0.241721	1.33235	0.0309659	1.37615	0.0810998	1.48413	0.0726956
1.33886	0.248253	1.33335	0.0313759	1.37714	0.0859511	1.48517	0.0740606
1.33984	0.25528	1.33435	0.0315875	1.37815	0.090481	1.48621	0.0752912
1.34087	0.261967	1.33536	0.0318474	1.37914	0.0950479	1.48724	0.0763729
1.34187	0.268602	1.33637	0.0320607	1.38012	0.0997776	1.48828	0.0773845
1.34287	0.275075	1.33739	0.0323242	1.3811	0.103831	1.48931	0.0783087
1.34387	0.281043	1.3384	0.0325596	1.38211	0.108044	1.49034	0.0790812
1.34489	0.287201	1.33939	0.0327515	1.38313	0.112739	1.49135	0.0797526
1.34588	0.292869	1.34039	0.0329243	1.38414	0.117128	1.49237	0.0804223
1.34684	0.298327	1.3414	0.0331379	1.38514	0.121206	1.49337	0.0809676
1.34785	0.304405	1.34239	0.033274	1.38613	0.125196	1.49439	0.0814758
1.34888	0.310606	1.34338	0.0333752	1.38714	0.129473	1.4954	0.0819973
1.34987	0.316291	1.34438	0.0336298	1.38815	0.133283	1.49641	0.0824429
1.35088	0.321752	1.3454	0.0338714	1.38915	0.136723	1.49742	0.082865
1.35187	0.326169	1.34641	0.033979	1.39016	0.140366	1.49844	0.0832432
1.35285	0.331449	1.3474	0.0341295	1.39115	0.144694	1.49945	0.0835838
1.35387	0.337358	1.3484	0.0343445	1.39216	0.148729	1.50045	0.0838305
1.35486	0.342201	1.3494	0.0344669	1.39315	0.151874	1.50145	0.0840102
1.35586	0.347377	1.35039	0.0346393	1.39415	0.155272	1.50247	0.0842534
1.35686	0.353136	1.35137	0.0348367	1.39516	0.158815	1.50349	0.0844968
1.35787	0.358466	1.35237	0.0351065	1.39616	0.162976	1.5045	0.0847329
1.35889	0.364568	1.35338	0.0352672	1.39714	0.166155	1.5055	0.0849842
1.35986	0.370518	1.35439	0.0354342	1.39814	0.169435	1.5065	0.0851758
1.36086	0.375572	1.35539	0.0356493	1.39913	0.172889	1.5075	0.0853034
1.36186	0.381146	1.35639	0.0359264	1.40013	0.177	1.5085	0.0853846
1.36287	0.386707	1.35739	0.0362182	1.40114	0.180663	1.50949	0.0854547
1.36388	0.392038	1.3584	0.0364464	1.40214	0.183417	1.51048	0.0855055
1.36489	0.398603	1.3594	0.0366306	1.40314	0.186648	1.51149	0.0855364
1.36589	0.404766	1.36039	0.0370291	1.40414	0.189994	1.5125	0.0855968
1.36688	0.410768	1.36139	0.0373519	1.40514	0.193811	1.5135	0.0856671
1.36787	0.416593	1.36239	0.0374969	1.40615	0.197076	1.5145	0.0856775
1.36889	0.421657	1.36338	0.0376246	1.40715	0.199992	1.51549	0.0856699
1.3699	0.428526	1.36438	0.0378753	1.40817	0.203383	1.51648	0.0856753
1.37088	0.434477	1.36539	0.0381054	1.40916	0.206941	1.51748	0.0856645
1.37187	0.439486	1.36641	0.0383402	1.41016	0.21088	1.51849	0.0856331
1.37288	0.445594	1.36739	0.0385524	1.41116	0.213777	1.51949	0.0856272
1.37388	0.451873	1.36836	0.0389277	1.41214	0.216711	1.52049	0.0856395
1.37487	0.45839	1.36934	0.0392288	1.41315	0.219941	1.52151	0.0856437
1.37585	0.465006	1.37034	0.0394364	1.41415	0.223062	1.52251	0.0856131
1.37683	0.470944	1.37135	0.0396922	1.41515	0.226772	1.5235	0.0855747
1.37784	0.477077	1.37237	0.040142	1.41615	0.22962	1.52449	0.0855349
1.37884	0.483149	1.37339	0.0404722	1.41716	0.232384	1.5255	0.085506
1.37985	0.489272	1.3744	0.0406596	1.41815	0.23563	1.52649	0.0854825
1.38084	0.49577	1.3754	0.040815	1.41915	0.23895	1.52748	0.0854528
1.38184	0.50163	1.3764	0.0411306	1.42014	0.242746	1.52847	0.085443
1.38284	0.507906	1.3774	0.0414288	1.42114	0.245612	1.52948	0.0854368
1.38383	0.514175	1.3784	0.041627	1.42216	0.248423	1.53048	0.0853881
1.38483	0.520046	1.3794	0.0419204	1.42316	0.251621	1.53147	0.0852732
1.38581	0.526395	1.38039	0.0422645	1.42416	0.25477	1.53247	0.0852213
1.38683	0.532368	1.38139	0.0425143	1.42515	0.258344	1.53347	0.085147
1.38784	0.538211	1.38239	0.0426758	1.42614	0.261158	1.53447	0.0850595
1.38884	0.544288	1.38339	0.0428972	1.42716	0.263637	1.53547	0.0849654
1.38985	0.549968	1.38439	0.0433504	1.42817	0.266705	1.53648	0.0848908
1.39085	0.556164	1.3854	0.0437399	1.42917	0.269681	1.53748	0.0848485
1.39184	0.56229	1.3864	0.0440696	1.43016	0.273257	1.53848	0.0847801
1.39284	0.567987	1.38741	0.0444082	1.43115	0.276382	1.53947	0.0847089
1.39385	0.573739	1.38841	0.0448929	1.43213	0.278742	1.54047	0.084638
1.39486	0.579243	1.38938	0.0453725	1.43312	0.281723	1.54146	0.0845917
1.39586	0.584863	1.39036	0.0457909	1.43413	0.284734	1.54246	0.0845432
1.39686	0.590855	1.39135	0.0461772	1.43517	0.287914	1.54346	0.0844948
1.39787	0.596319	1.39235	0.0466758	1.43617	0.291311	1.54446	0.084495
1.39886	0.601869	1.39336	0.0471412	1.43716	0.29393	1.54546	0.0844726
1.39987	0.60775	1.39437	0.0474071	1.43815	0.296731	1.54646	0.0844361
1.40086	0.61327	1.39538	0.0476269	1.43915	0.29974	1.54745	0.0843617
1.40186	0.618785	1.39638	0.0479363	1.44015	0.303083	1.54845	0.0842746
1.40287	0.624569	1.39737	0.0482179	1.44116	0.306778	1.54946	0.0842221
1.40388	0.629826	1.39838	0.0484116	1.44217	0.309746	1.55046	0.0841893
1.40487	0.635135	1.39939	0.0486131	1.44317	0.313042	1.55148	0.0841278
1.40585	0.640707	1.40039	0.0489592	1.44415	0.316121	1.55247	0.0841373
1.40685	0.645938	1.4014	0.0492688	1.44515	0.318641	1.55347	0.0841661
1.40787	0.651505	1.40241	0.0494921	1.44616	0.321924	1.55447	0.0841405
1.40889	0.656951	1.40342	0.0496846	1.44717	0.324469	1.55547	0.0841089
1.40989	0.66193	1.40442	0.0498978	1.44817	0.326119	1.55647	0.0840971
1.41089	0.667188	1.40541	0.0501602	1.44916	0.328571	1.55746	0.0840905
1.41188	0.672553	1.40641	0.0505354	1.45016	0.331726	1.55845	0.0840924
1.41287	0.677541	1.40741	0.050871	1.45116	0.335425	1.55946	0.0840918
1.41387	0.682937	1.4084	0.051287	1.45216	0.339004	1.56046	0.084133
1.41485	0.688521	1.40939	0.0516503	1.45315	0.341234	1.56146	0.0841816
1.41585	0.693505	1.41037	0.0519654	1.45415	0.343171	1.56246	0.0842105
1.41687	0.698664	1.41137	0.0523724	1.45516	0.34573	1.56347	0.0842221
1.41786	0.703983	1.41238	0.0528759	1.45617	0.348647	1.56447	0.0842316
1.41884	0.709073	1.41339	0.053158	1.45716	0.351926	1.56546	0.08427
1.41986	0.714195	1.4144	0.0534598	1.45816	0.355105	1.56647	0.0843418
1.42087	0.719609	1.41541	0.0537683	1.45915	0.357355	1.56747	0.0844189
1.42187	0.724346	1.41641	0.0543384	1.46015	0.359668	1.56848	0.0845244
1.42285	0.729374	1.41741	0.0547016	1.46117	0.362439	1.56948	0.0846288
1.42385	0.734686	1.41839	0.0549955	1.46217	0.365266	1.57048	0.0846989
1.42485	0.739423	1.41939	0.0553827	1.46315	0.368757	1.57149	0.08475
1.42586	0.743914	1.4204	0.0558124	1.46415	0.371797	1.57249	0.084824
1.42684	0.748658	1.4214	0.0562069	1.46515	0.373643	1.57349	0.0849545
1.42785	0.753308	1.4224	0.0565728	1.46615	0.375645	1.57448	0.0851155
1.42886	0.75771	1.42339	0.0568242	1.46714	0.378073	1.57548	0.0852897
1.42987	0.762044	1.42437	0.0572358	1.46813	0.380634	1.57649	0.085437
1.43087	0.766734	1.42537	0.0575948	1.46914	0.383554	1.57749	0.0855487
1.43185	0.77064	1.42636	0.0578682	1.47014	0.386599	1.57849	0.0856613
1.43284	0.774471	1.42735	0.0582129	1.47113	0.388858	1.5795	0.0857863
1.43385	0.778722	1.42836	0.0586616	1.47212	0.390796	1.5805	0.0859663
1.43486	0.783139	1.42938	0.0590473	1.47314	0.392963	1.5815	0.0861438
1.43586	0.78638	1.43039	0.0594318	1.47414	0.395536	1.58251	0.086342
1.43683	0.78947	1.43138	0.0599396	1.47514	0.398784	1.58353	0.0866116
1.43784	0.792714	1.43239	0.0604693	1.47614	0.402224	1.58454	0.086906
1.43887	0.796462	1.4334	0.0609425	1.47713	0.404514	1.58554	0.0871224
1.43987	0.800006	1.4344	0.061367	1.47814	0.406285	1.58654	0.0873302
1.44086	0.802562	1.43541	0.0618535	1.47913	0.408808	1.58754	0.0875881
1.44183	0.804862	1.43641	0.0621888	1.48013	0.411346	1.58855	0.0878534
1.44282	0.807374	1.43743	0.0625959	1.48113	0.413156	1.58956	0.0881683
1.44381	0.809981	1.43843	0.0629773	1.48214	0.415256	1.59058	0.0884917
1.44484	0.812706	1.43941	0.0632829	1.48315	0.417928	1.59159	0.0887719
1.44588	0.815361	1.44039	0.0636199	1.48414	0.420017	1.59259	0.0891192
1.44686	0.817282	1.44139	0.0639809	1.48514	0.421308	1.5936	0.0894907
1.44783	0.818456	1.44239	0.0642303	1.48615	0.422847	1.5946	0.0899067
1.44884	0.819585	1.44339	0.0645283	1.48716	0.425188	1.59562	0.0902596
1.44986	0.820968	1.44437	0.0648274	1.48816	0.428375	1.59663	0.0905123
1.45087	0.82239	1.44537	0.0650745	1.48916	0.432023	1.59763	0.0908244
1.45186	0.823549	1.44638	0.0653045	1.49015	0.434914	1.59865	0.091318
1.45286	0.824398	1.44739	0.0655317	1.49114	0.43639	1.59966	0.0917824
1.45386	0.825094	1.44839	0.0658695	1.49215	0.436935	1.60067	0.0922521
1.45486	0.825794	1.44939	0.0662147	1.49315	0.437716	1.60169	0.0927878
1.45587	0.826371	1.45038	0.0665104	1.49416	0.439337	1.60271	0.0933121
1.45688	0.826572	1.45138	0.0668001	1.49513	0.441552	1.60373	0.0937966
1.45788	0.826675	1.45239	0.0672298	1.49612	0.443709	1.60473	0.0943493
1.45887	0.826687	1.45339	0.0676292	1.49713	0.44572	1.60574	0.0948984
1.45987	0.826474	1.4544	0.0681031	1.49813	0.448089	1.60674	0.0954226
1.46085	0.826089	1.4554	0.0684794	1.49913	0.450387	1.60776	0.0960321
1.46184	0.825676	1.45639	0.0690176	1.50012	0.452187	1.60879	0.0966761
1.46283	0.825311	1.45739	0.0695139	1.50111	0.453608	1.6098	0.097324
1.46382	0.824753	1.45838	0.0698378	1.50211	0.45518	1.61082	0.0979795
1.46483	0.824012	1.45938	0.0701062	1.50311	0.457066	1.61183	0.098608
1.46582	0.82303	1.46039	0.0704906	1.50413	0.458919	1.61284	0.0993174
1.46681	0.821205	1.4614	0.0707947	1.50512	0.460671	1.61386	0.100016
1.46784	0.819769	1.4624	0.0711155	1.50611	0.4626	1.61489	0.100771
1.46884	0.818786	1.4634	0.0713812	1.50711	0.464783	1.61591	0.101524
1.46984	0.817993	1.46438	0.07174	1.50812	0.466811	1.61694	0.102357
1.47085	0.817215	1.46537	0.0720537	1.5091	0.468191	1.61797	0.103164
1.47185	0.816012	1.46638	0.0723163	1.5101	0.469106	1.619	0.104012
1.47284	0.814042	1.46738	0.0725199	1.51108	0.470154	1.62002	0.10483
1.47384	0.81163	1.46837	0.0726361	1.51209	0.471723	1.62104	0.105714
1.47484	0.809386	1.46935	0.0728309	1.51309	0.473405	1.62204	0.106598
1.47585	0.807352	1.47034	0.0731606	1.51409	0.475012	1.62307	0.107514
1.47682	0.805203	1.47134	0.0734537	1.5151	0.476474	1.62411	0.108459
1.4778	0.803089	1.47235	0.0737772	1.51611	0.477982	1.62515	0.109494
1.4788	0.801434	1.47336	0.0740605	1.51712	0.479588	1.62617	0.110572
1.47981	0.799482	1.47436	0.074367	1.51813	0.48134	1.6272	0.111623
1.48083	0.796608	1.47537	0.0746383	1.51913	0.482885	1.62822	0.11269
1.48183	0.793825	1.47637	0.0750917	1.52013	0.484132	1.62924	0.113794
1.48282	0.791188	1.47736	0.0754623	1.52112	0.485146	1.63027	0.114943
1.48383	0.78849	1.47838	0.075644	1.52212	0.486214	1.63131	0.116115
1.48483	0.786177	1.47938	0.0758082	1.52311	0.487395	1.63236	0.117319
1.48584	0.78358	1.48037	0.0761758	1.52409	0.488693	1.63341	0.118621
1.48683	0.780349	1.48137	0.0764982	1.52509	0.490057	1.63445	0.11996
1.48783	0.777057	1.48238	0.0768129	1.52609	0.491293	1.63547	0.121311
1.48883	0.773828	1.48338	0.0770235	1.52709	0.492334	1.6365	0.122677
1.48982	0.770831	1.48438	0.07737	1.52811	0.49344	1.63754	0.124088
1.49082	0.76771	1.48537	0.077756	1.52909	0.494771	1.63857	0.125522
1.49182	0.764179	1.48637	0.0779852	1.53007	0.496274	1.63961	0.127022
1.49283	0.760801	1.48737	0.0781368	1.5311	0.497815	1.64065	0.128559
1.49381	0.757306	1.48836	0.0783602	1.53211	0.49909	1.64169	0.13018
1.4948	0.75411	1.48937	0.0785751	1.53311	0.499903	1.64273	0.131852
1.49583	0.750602	1.49037	0.0787154	1.5341	0.500467	1.64378	0.133591
1.49685	0.746865	1.49137	0.0787977	1.5351	0.501138	1.64484	0.135274
1.49784	0.743192	1.49238	0.0789889	1.53611	0.501981	1.64588	0.136995
1.4988	0.739457	1.49339	0.0791527	1.53711	0.502912	1.64694	0.13881
1.4998	0.735859	1.49439	0.0791456	1.5381	0.503929	1.64801	0.140701
1.50082	0.731932	1.49538	0.079125	1.53911	0.504963	1.64908	0.142669
1.50181	0.727939	1.49636	0.079249	1.54011	0.506073	1.65013	0.144683
1.5028	0.724255	1.49734	0.0793224	1.54112	0.507017	1.65118	0.146708
1.50381	0.720891	1.49833	0.0793165	1.54212	0.50778	1.65222	0.148811
1.50482	0.716961	1.49935	0.0793274	1.54311	0.50852	1.65328	0.150994
1.50581	0.712731	1.50035	0.0794458	1.5441	0.509388	1.65434	0.153228
1.50681	0.708668	1.50133	0.0795566	1.5451	0.51038	1.65539	0.155508
1.50782	0.70496	1.50234	0.0795284	1.54611	0.511474	1.65645	0.157863
1.50882	0.700916	1.50336	0.0794826	1.54711	0.512655	1.65751	0.16026
1.50979	0.696829	1.50436	0.0795568	1.5481	0.513817	1.65857	0.162766
1.5108	0.693084	1.50535	0.0795513	1.54911	0.514753	1.65964	0.165318
1.5118	0.689903	1.50637	0.079406	1.5501	0.515454	1.66072	0.167893
1.51279	0.686027	1.50738	0.0792494	1.55111	0.515947	1.66179	0.170534
1.51379	0.681893	1.50839	0.0792645	1.5521	0.516348	1.66287	0.173259
1.5148	0.678004	1.50939	0.0793	1.5531	0.516708	1.66395	0.176064
1.51583	0.674646	1.51039	0.0791288	1.55413	0.517149	1.66502	0.17891
1.51685	0.671105	1.51138	0.0789334	1.55513	0.517591	1.6661	0.1818
1.51785	0.66725	1.51237	0.0788337	1.55612	0.518133	1.66719	0.184797
1.51885	0.66375	1.51337	0.0787799	1.55711	0.518771	1.66829	0.187867
1.51983	0.66048	1.51437	0.0786087	1.5581	0.519467	1.66938	0.191003
1.52081	0.657532	1.51535	0.0783628	1.55911	0.520181	1.67046	0.194179
1.5218	0.653923	1.51635	0.0782426	1.56011	0.520956	1.67152	0.197431
1.52281	0.650272	1.51734	0.078158	1.56112	0.521632	1.67261	0.200781
1.52383	0.646991	1.51835	0.0779982	1.5621	0.522152	1.6737	0.204188
1.5248	0.644093	1.51936	0.0776751	1.56309	0.522625	1.67479	0.207659
1.52579	0.641402	1.52036	0.0775418	1.56407	0.523099	1.67589	0.211249
1.52681	0.63848	1.52134	0.0773907	1.5651	0.523504	1.67699	0.214903
1.52781	0.635449	1.52235	0.0771576	1.56612	0.523869	1.6781	0.2186
1.52881	0.632579	1.52336	0.0768468	1.56714	0.524199	1.6792	0.222375
1.5298	0.629858	1.52436	0.0766642	1.56814	0.5246	1.68031	0.226238
1.53081	0.627462	1.52536	0.0764297	1.56913	0.525023	1.68141	0.230125
1.5318	0.62523	1.52635	0.0760476	1.57011	0.525387	1.68253	0.234101
1.53281	0.62255	1.52733	0.0756714	1.5711	0.525785	1.68364	0.238132
1.53381	0.619824	1.52831	0.0754837	1.5721	0.526244	1.68477	0.242296
1.53481	0.617381	1.52932	0.075216	1.5731	0.526734	1.68591	0.246556
1.53581	0.61517	1.53035	0.0749205	1.57408	0.527219	1.68701	0.250846
1.5368	0.613048	1.53135	0.0745958	1.57509	0.527721	1.68811	0.255244
1.53783	0.611113	1.53231	0.0742502	1.57609	0.528369	1.68923	0.259691
1.53886	0.609284	1.53331	0.0739832	1.57708	0.528966	1.69034	0.264197
1.53986	0.607337	1.53432	0.0737681	1.57809	0.529443	1.69146	0.268784
1.54083	0.605251	1.53534	0.0735193	1.57911	0.529958	1.69259	0.273444
1.54181	0.6034	1.53633	0.0733908	1.58012	0.530443	1.69373	0.278203
1.54281	0.60177	1.53734	0.0732095	1.5811	0.530786	1.69487	0.28305
1.54381	0.600076	1.53836	0.0729805	1.58209	0.530984	1.69599	0.287945
1.5448	0.598493	1.53936	0.0727387	1.5831	0.531189	1.69713	0.292901
1.5458	0.59698	1.54034	0.072559	1.58411	0.531443	1.69826	0.297923
1.54683	0.595737	1.54136	0.0723898	1.58511	0.531647	1.6994	0.303021
1.54784	0.594693	1.54237	0.0721197	1.58611	0.53177	1.70055	0.308215
1.54884	0.593633	1.54336	0.0718393	1.58711	0.531882	1.70169	0.313463
1.54983	0.592375	1.54435	0.0716648	1.5881	0.532011	1.70283	0.318821
1.55081	0.591182	1.54534	0.0713915	1.5891	0.532137	1.70397	0.324233
1.55181	0.589901	1.54634	0.0711086	1.5901	0.532275	1.70512	0.3297
1.55283	0.588606	1.54735	0.0708021	1.59111	0.532371	1.70628	0.335225
1.55384	0.587497	1.54837	0.0707516	1.59211	0.532536	1.70744	0.340829
1.55484	0.586534	1.54938	0.0706258	1.59312	0.532702	1.70862	0.346496
1.55584	0.585708	1.55038	0.0703674	1.59413	0.532795	1.70976	0.35223
1.55683	0.584969	1.55137	0.070144	1.59512	0.532822	1.7109	0.358068
1.55783	0.584301	1.55237	0.070019	1.59609	0.53294	1.71206	0.363996
1.55882	0.583671	1.55337	0.0698489	1.59711	0.533142	1.71322	0.369972
1.55984	0.583063	1.55436	0.0696366	1.59812	0.533285	1.71438	0.376002
1.56083	0.582418	1.55535	0.0694122	1.59913	0.533444	1.71554	0.382091
1.56184	0.581825	1.55636	0.0693872	1.60013	0.53367	1.71671	0.388243
1.56285	0.581239	1.55736	0.0693275	1.6011	0.533845	1.71788	0.394441
1.56385	0.580842	1.55837	0.0690523	1.60209	0.534001	1.71905	0.400729
1.56485	0.580487	1.55935	0.0688193	1.60308	0.534106	1.72023	0.407078
1.56585	0.580214	1.56031	0.0688885	1.60406	0.53422	1.72141	0.413515
1.56685	0.580133	1.56131	0.0687532	1.60507	0.534355	1.72258	0.420011
1.56785	0.580022	1.56232	0.0685079	1.60607	0.534614	1.72376	0.42655
1.56883	0.579869	1.56333	0.068444	1.6071	0.53484	1.72495	0.433135
1.56981	0.57972	1.56433	0.0684252	1.60812	0.535099	1.72613	0.439795
1.57081	0.579614	1.56535	0.0683179	1.60912	0.535344	1.72731	0.4465
1.57179	0.579551	1.56638	0.0682139	1.6101	0.535665	1.7285	0.453277
1.57279	0.579583	1.56738	0.0681773	1.61108	0.536069	1.72968	0.460096
1.57379	0.579688	1.56838	0.0682429	1.6121	0.536399	1.73084	0.467031
1.57481	0.579938	1.56938	0.0682999	1.61312	0.536668	1.73204	0.474009
1.57581	0.580137	1.57038	0.0682399	1.61412	0.536879	1.73325	0.481039
1.57679	0.58033	1.57136	0.0681424	1.61511	0.537109	1.73444	0.488109
1.57781	0.580526	1.57235	0.0682623	1.61612	0.537419	1.73564	0.495349
1.57882	0.5809	1.57336	0.068235	1.61711	0.537638	1.73684	0.50264
1.57984	0.581416	1.57437	0.0681548	1.6181	0.537845	1.73806	0.5099
1.58086	0.581955	1.57537	0.068166	1.61909	0.53797	1.73926	0.517175
1.58186	0.582446	1.57636	0.0683064	1.62008	0.538195	1.74047	0.524544
1.58284	0.583141	1.57734	0.0683709	1.62109	0.538395	1.74167	0.531958
1.58384	0.583839	1.57834	0.0684404	1.62209	0.538575	1.74287	0.539393
1.58484	0.584523	1.57935	0.0685084	1.62309	0.538793	1.74407	0.546869
1.58585	0.585206	1.58036	0.0687176	1.62411	0.539029	1.74526	0.554405
1.58684	0.585919	1.58135	0.0688577	1.62513	0.53919	1.74646	0.562003
1.5878	0.586696	1.58234	0.0689633	1.62614	0.53932	1.74766	0.569665
1.58881	0.587589	1.58333	0.0691209	1.62713	0.539465	1.74887	0.577364
1.58984	0.588613	1.58433	0.0693998	1.62812	0.539675	1.75007	0.585126
1.59084	0.58983	1.58533	0.0695726	1.62913	0.539887	1.75129	0.592943
1.59184	0.591241	1.58633	0.0697003	1.6301	0.540067	1.75251	0.600791
1.59282	0.59271	1.58733	0.0699097	1.6311	0.540275	1.75373	0.608673
1.59382	0.593814	1.58835	0.0702607	1.63211	0.540458	1.75493	0.616585
1.59481	0.594513	1.58937	0.0705306	1.6331	0.540685	1.75615	0.624553
1.5958	0.595283	1.59036	0.0706041	1.6341	0.540913	1.75737	0.632557
1.5968	0.596424	1.59135	0.0707379	1.63509	0.541131	1.7586	0.640603
1.59783	0.597812	1.59236	0.0710076	1.6361	0.541506	1.75983	0.648718
1.59884	0.599304	1.59337	0.0712788	1.63711	0.541819	1.76104	0.656888
1.59984	0.600875	1.59437	0.0716285	1.63809	0.542188	1.76226	0.665104
1.60085	0.602364	1.59537	0.0718547	1.6391	0.542701	1.76348	0.673342
1.60184	0.604031	1.59636	0.0721235	1.6401	0.543293	1.7647	0.681615
1.60285	0.606009	1.59734	0.0723694	1.64111	0.543925	1.76592	0.689925
1.60383	0.608154	1.59833	0.0726076	1.6421	0.544541	1.76716	0.698289
1.60481	0.609993	1.59933	0.0728722	1.6431	0.545274	1.76839	0.706686
1.6058	0.611514	1.60035	0.07326	1.64411	0.546037	1.76962	0.71515
1.60681	0.613227	1.60136	0.0736149	1.6451	0.546628	1.77085	0.723649
1.60781	0.615302	1.60236	0.0739715	1.6461	0.547062	1.77209	0.732174
1.60881	0.617412	1.60335	0.0742868	1.64712	0.547362	1.77333	0.740725
1.60982	0.619583	1.60434	0.0746907	1.64811	0.547703	1.77456	0.749307
1.61083	0.622031	1.60534	0.0751438	1.64913	0.548001	1.7758	0.757931
1.61183	0.624577	1.60634	0.0756307	1.65014	0.548256	1.77704	0.766599
1.61281	0.626783	1.60734	0.0761425	1.65114	0.548475	1.77827	0.775301
1.61381	0.629001	1.60833	0.0768353	1.65213	0.548856	1.7795	0.784054
1.61482	0.631462	1.60932	0.0775257	1.65312	0.549359	1.78075	0.792832
1.61581	0.633959	1.6103	0.0781059	1.65411	0.549935	1.78199	0.801636
1.61681	0.636627	1.61129	0.0786656	1.65512	0.550582	1.78323	0.810476
1.61781	0.639685	1.61231	0.0792845	1.65611	0.551326	1.78448	0.819356
1.61881	0.642478	1.61333	0.0798751	1.6571	0.552154	1.78573	0.828264
1.61982	0.645117	1.61434	0.0804097	1.65811	0.553116	1.78695	0.837179
1.62084	0.647888	1.61533	0.0809186	1.6591	0.553996	1.78816	0.84612
1.62185	0.651001	1.61634	0.0815488	1.66008	0.554809	1.7894	0.855127
1.62284	0.65486	1.61734	0.082163	1.6611	0.555487	1.79065	0.864188
1.62382	0.658133	1.61835	0.0826902	1.66212	0.556026	1.79191	0.873263
1.62482	0.661133	1.61936	0.0832746	1.66313	0.556676	1.79316	0.882346
1.62582	0.664455	1.62036	0.0840602	1.66413	0.557562	1.79441	0.891468
1.62683	0.668087	1.62135	0.0848628	1.66512	0.558689	1.79565	0.900624
1.62782	0.672102	1.62235	0.085688	1.6661	0.559913	1.7969	0.909837
1.62883	0.675608	1.62334	0.0864811	1.66711	0.561105	1.79816	0.919076
1.62984	0.679262	1.62434	0.0873749	1.66811	0.562303	1.79942	0.928361
1.63082	0.683572	1.62535	0.0881342	1.66911	0.563188	1.80067	0.937678
1.63183	0.688136	1.62635	0.0888444	1.6701	0.563776	1.80192	0.947012
1.63283	0.692064	1.62731	0.0895784	1.6711	0.564299	1.80319	0.956361
1.63381	0.69607	1.62831	0.0904186	1.67209	0.564926	1.80445	0.965732
1.63481	0.700647	1.62934	0.091297	1.67309	0.5658	1.8057	0.975138
1.6358	0.70533	1.63035	0.0923041	1.67411	0.567117	1.80695	0.984569
1.63679	0.709989	1.63136	0.0934472	1.67513	0.568698	1.80821	0.994028
1.63779	0.714937	1.63236	0.0945149	1.67613	0.570141	1.80946	1.00354
1.6388	0.720208	1.63335	0.0955534	1.67712	0.571197	1.81071	1.0131
1.63979	0.72518	1.63433	0.0964334	1.6781	0.572077	1.81198	1.02266
1.64078	0.730438	1.63533	0.0972814	1.67908	0.573107	1.81324	1.03223
1.64179	0.73593	1.63633	0.0982196	1.68009	0.57451	1.8145	1.04185
1.64281	0.741351	1.63732	0.099264	1.6811	0.576195	1.81578	1.05151
1.6438	0.747076	1.63832	0.100382	1.68213	0.577837	1.81704	1.06118
1.64481	0.752987	1.63932	0.101542	1.68313	0.579076	1.8183	1.07088
1.64582	0.758821	1.64034	0.102905	1.68412	0.579933	1.81956	1.0806
1.64681	0.765083	1.64135	0.104107	1.6851	0.580693	1.82083	1.09039
1.64783	0.771138	1.64236	0.105156	1.6861	0.581855	1.82211	1.10017
1.64885	0.777609	1.64334	0.106339	1.68712	0.583473	1.82337	1.10995
1.64984	0.784298	1.64432	0.10785	1.68812	0.58531	1.82463	1.11978
1.65082	0.790743	1.64532	0.109453	1.68912	0.586851	1.8259	1.12964
1.65181	0.797689	1.64634	0.110979	1.69011	0.588131	1.82716	1.13951
1.65281	0.804415	1.64734	0.112243	1.6911	0.589558	1.82841	1.14941
1.65382	0.811781	1.64833	0.113546	1.69211	0.591609	1.82968	1.15938
1.65484	0.819039	1.64934	0.114927	1.69313	0.593665	1.83097	1.16939
1.65585	0.826713	1.65033	0.116402	1.69413	0.59521	1.83224	1.1794
1.65684	0.834247	1.65133	0.118013	1.69513	0.596351	1.83352	1.18942
1.65784	0.842267	1.65234	0.119608	1.69612	0.597661	1.83479	1.19948
1.65883	0.850232	1.65335	0.120983	1.69711	0.59945	1.83608	1.20955
1.65984	0.858352	1.65436	0.122481	1.69811	0.601391	1.83735	1.21966
1.66084	0.866554	1.65536	0.124374	1.69911	0.603024	1.83863	1.22978
1.66182	0.875131	1.65635	0.126357	1.7001	0.604629	1.83991	1.23992
1.66283	0.88377	1.65736	0.128157	1.70109	0.606617	1.84119	1.25009
1.66384	0.892805	1.65834	0.129808	1.70209	0.608949	1.84245	1.26027
1.66486	0.901681	1.65932	0.13157	1.7031	0.610934	1.84373	1.27051
1.66586	0.910774	1.66033	0.133524	1.70412	0.612434	1.84501	1.28077
1.66683	0.919904	1.66134	0.135498	1.70513	0.614153	1.84628	1.29103
1.66783	0.92933	1.66235	0.137424	1.70613	0.616319	1.84756	1.30133
1.66883	0.939344	1.66334	0.139511	1.70712	0.618482	1.84885	1.31166
1.66981	0.949146	1.66433	0.141952	1.70811	0.620522	1.85014	1.32204
1.67081	0.95928	1.66532	0.144229	1.70911	0.622825	1.85142	1.33245
1.67182	0.969702	1.66631	0.146288	1.7101	0.625275	1.8527	1.3429
1.67282	0.980066	1.66731	0.148514	1.7111	0.627357	1.85398	1.35338
1.67381	0.99076	1.66833	0.150957	1.71212	0.629226	1.85526	1.36389
1.67483	1.00179	1.66934	0.153345	1.71311	0.631388	1.85654	1.37438
1.67584	1.01288	1.67034	0.156099	1.71413	0.633626	1.85784	1.38489
1.67682	1.02395	1.67133	0.15888	1.71514	0.635612	1.85913	1.39543
1.67783	1.03536	1.67234	0.161207	1.71614	0.637965	1.86043	1.40602
1.67885	1.04693	1.67334	0.163591	1.71713	0.640757	1.86171	1.41664
1.67985	1.05871	1.67433	0.166248	1.71813	0.643107	1.86299	1.42727
1.68083	1.0707	1.67533	0.168881	1.71913	0.64507	1.86428	1.4379
1.68183	1.08283	1.67633	0.171928	1.72013	0.647385	1.86556	1.44855
1.68284	1.09523	1.67732	0.175019	1.72111	0.649835	1.86685	1.45922
1.68384	1.10779	1.67832	0.17785	1.72211	0.652247	1.86816	1.46994
1.68482	1.12053	1.67932	0.180717	1.72313	0.655398	1.86944	1.48069
1.68582	1.13344	1.68033	0.183898	1.72415	0.658318	1.87072	1.4915
1.68683	1.14652	1.68134	0.187338	1.72515	0.660401	1.87201	1.50235
1.68785	1.15981	1.68235	0.1907	1.72615	0.662808	1.8733	1.51321
1.68885	1.1731	1.68335	0.193707	1.72716	0.66555	1.87461	1.52407
1.68984	1.18687	1.68436	0.197097	1.72816	0.668244	1.87591	1.53496
1.69082	1.20072	1.68535	0.200487	1.72916	0.671398	1.87721	1.54586
1.69182	1.21471	1.68634	0.204056	1.73015	0.674264	1.87852	1.5568
1.69282	1.22898	1.68732	0.207491	1.73114	0.676537	1.87982	1.56777
1.6938	1.24338	1.68832	0.211111	1.73212	0.679329	1.88111	1.5788
1.69481	1.25807	1.68933	0.214825	1.7331	0.682234	1.88241	1.58987
1.69582	1.27276	1.69034	0.218793	1.7341	0.685189	1.88371	1.60092
1.69683	1.28772	1.69133	0.222808	1.73512	0.68858	1.88501	1.61198
1.69782	1.30282	1.69233	0.226762	1.73611	0.691298	1.88632	1.6231
1.69882	1.31835	1.69332	0.230693	1.7371	0.693951	1.88762	1.63425
1.69984	1.33427	1.6943	0.234792	1.73812	0.696979	1.88892	1.6454
1.70083	1.34981	1.69529	0.238931	1.73912	0.700097	1.89022	1.65657
1.70181	1.36536	1.69632	0.243293	1.74012	0.703696	1.89152	1.66781
1.70281	1.38157	1.69734	0.247602	1.74113	0.706839	1.89284	1.67908
1.70382	1.39795	1.69834	0.252041	1.74214	0.709845	1.89414	1.69038
1.70485	1.41482	1.69935	0.256505	1.74314	0.713044	1.89544	1.70169
1.70587	1.43153	1.70035	0.261149	1.74413	0.716317	1.89675	1.71296
1.70688	1.44844	1.70134	0.265912	1.74512	0.720035	1.89806	1.72424
1.70788	1.46536	1.70234	0.270635	1.74613	0.723215	1.89937	1.73561
1.70887	1.48283	1.70334	0.275195	1.74713	0.726287	1.90069	1.74702
1.70985	1.50044	1.70434	0.279962	1.74813	0.729634	1.902	1.75849
1.71081	1.51841	1.70533	0.285125	1.74911	0.733153	1.90331	1.77
1.71181	1.53658	1.70632	0.29019	1.75011	0.73693	1.90461	1.78151
1.71283	1.55477	1.7073	0.295322	1.75113	0.74017	1.90591	1.79305
1.71383	1.57317	1.70828	0.300734	1.75215	0.743689	1.90724	1.80472
1.71484	1.59166	1.70928	0.306031	1.75314	0.746998	1.90856	1.8164
1.71584	1.61037	1.71027	0.311549	1.75413	0.750701	1.90988	1.82808
1.71684	1.62926	1.71128	0.317288	1.75513	0.754379	1.91119	1.83976
1.71783	1.64828	1.71231	0.322946	1.75612	0.758115	1.91251	1.85147
1.71884	1.66753	1.71334	0.328738	1.7571	0.761776	1.91381	1.86319
1.71984	1.68694	1.71436	0.334519	1.75811	0.765493	1.91514	1.87495
1.72083	1.70656	1.71536	0.340783	1.75912	0.769298	1.91647	1.88673
1.72182	1.72644	1.71636	0.347106	1.76013	0.772816	1.91778	1.89855
1.72282	1.74694	1.71734	0.352672	1.76113	0.776696	1.9191	1.9104
1.72383	1.76742	1.71834	0.358484	1.76212	0.780953	1.92042	1.92229
1.72485	1.78779	1.71935	0.364776	1.76312	0.785147	1.92174	1.93416
1.72585	1.80828	1.72034	0.371133	1.76413	0.78863	1.92307	1.9461
1.72683	1.82896	1.72132	0.377867	1.76514	0.792489	1.92441	1.95809
1.72782	1.84988	1.7223	0.384393	1.76612	0.79651	1.92575	1.97011
1.72885	1.87093	1.72329	0.390866	1.76714	0.800789	1.92707	1.98214
1.72988	1.89221	1.7243	0.397714	1.76815	0.804612	1.92839	1.99418
1.73086	1.91361	1.72532	0.404789	1.76915	0.808677	1.92972	2.00623
1.73184	1.93506	1.72635	0.412082	1.77013	0.813191	1.93104	2.01834
1.73285	1.95683	1.72736	0.418837	1.77114	0.817637	1.93237	2.0305
1.73384	1.97869	1.7284	0.425917	1.77215	0.821766	1.93371	2.04271
1.73482	2.0009	1.72944	0.433376	1.77311	0.826023	1.93504	2.05496
1.73582	2.02341	1.73045	0.44114	1.77408	0.830715	1.93638	2.06721
1.73682	2.04588	1.73145	0.448161	1.77511	0.834985	1.93771	2.0795
1.73782	2.06845	1.73245	0.455533	1.77613	0.839429	1.93904	2.0918
1.73881	2.0913	1.73342	0.463082	1.77714	0.844044	1.94037	2.10415
1.73984	2.11435	1.73439	0.470771	1.77815	0.848689	1.94171	2.11656
1.74085	2.13763	1.73537	0.478591	1.77913	0.852907	1.94305	2.12899
1.74183	2.16078	1.73636	0.486502	1.78013	0.857297	1.94439	2.14149
1.74283	2.18414	1.73735	0.494493	1.78115	0.86217	1.94573	2.154
1.74385	2.20783	1.73834	0.502469	1.78214	0.866725	1.94707	2.16653
1.74488	2.23163	1.73933	0.510644	1.78312	0.871387	1.94841	2.17909
1.74588	2.25557	1.74032	0.519032	1.78413	0.876189	1.94976	2.19168
1.74683	2.2796	1.74131	0.527412	1.78513	0.881098	1.9511	2.20428
1.74783	2.30361	1.74233	0.535844	1.78615	0.885887	1.95245	2.21692
1.74886	2.32785	1.74335	0.544342	1.78714	0.89073	1.95378	2.22959
1.74984	2.35252	1.74434	0.553091	1.78814	0.895914	1.95513	2.24234
1.75082	2.37705	1.74533	0.561848	1.78913	0.900619	1.95647	2.2551
1.75185	2.40181	1.74633	0.570675	1.79013	0.905459	1.95783	2.26789
1.75286	2.42674	1.74735	0.579596	1.79115	0.910894	1.95919	2.28072
1.75388	2.45225	1.74838	0.588671	1.79214	0.91549	1.96052	2.29359
1.75489	2.47713	1.74939	0.597766	1.79317	0.9203	1.96188	2.30647
1.75589	2.5025	1.75038	0.60688	1.79418	0.925699	1.96324	2.3194
1.75686	2.52837	1.75135	0.616135	1.79516	0.930683	1.9646	2.33238
1.75786	2.5547	1.75235	0.625547	1.79613	0.935856	1.96595	2.34542
1.75886	2.58061	1.75336	0.63496	1.7971	0.941566	1.9673	2.35847
1.75984	2.60653	1.75436	0.644455	1.79811	0.946624	1.96866	2.37154
1.76083	2.63271	1.75536	0.654019	1.79914	0.951707	1.97	2.38468
1.76183	2.65905	1.75637	0.663863	1.80013	0.957305	1.97136	2.39784
1.76285	2.68536	1.75738	0.67386	1.80111	0.96269	1.97272	2.41101
1.76384	2.71175	1.75838	0.683808	1.80211	0.968174	1.97409	2.42427
1.76483	2.73841	1.75938	0.693759	1.80314	0.974061	1.97545	2.43758
1.7658	2.76529	1.76037	0.704019	1.80413	0.979544	1.9768	2.45096
1.76679	2.79233	1.76136	0.714251	1.80512	0.985047	1.97816	2.46432
1.76781	2.81941	1.76236	0.724411	1.80614	0.990908	1.97951	2.47766
1.76884	2.84662	1.76336	0.734741	1.80716	0.996603	1.98087	2.49104
1.76983	2.87402	1.76436	0.745309	1.80815	1.00229	1.98225	2.50449
1.77081	2.90166	1.76535	0.755848	1.80914	1.00808	1.98362	2.51798
1.77182	2.9293	1.76634	0.766471	1.81013	1.01376	1.98499	2.53154
1.77284	2.95688	1.76735	0.777259	1.81114	1.0197	1.98637	2.54512
1.77386	2.98463	1.76835	0.78817	1.81215	1.02538	1.98775	2.55874
1.77487	3.01272	1.76936	0.799128	1.81317	1.0311	1.98912	2.57236
1.77586	3.04111	1.77035	0.810079	1.81416	1.03732	1.99049	2.586
1.77685	3.06942	1.77135	0.821111	1.81514	1.04316	1.99185	2.59965
1.77783	3.09778	1.77235	0.832374	1.81614	1.04919	1.99322	2.61332
1.77883	3.12621	1.77336	0.843746	1.81714	1.05544	1.9946	2.62701
1.77983	3.15482	1.77435	0.854963	1.81812	1.06144	1.99596	2.64075
1.78083	3.18353	1.77535	0.866382	1.81911	1.06774	1.99732	2.65454
1.78181	3.21224	1.77635	0.877839	1.82012	1.0739	1.99871	2.6684
1.78283	3.24117	1.77736	0.889537	1.82114	1.08011	2.0001	2.68237
1.78384	3.27029	1.77837	0.901354	1.82214	1.08646	2.00148	2.69643
1.78485	3.29941	1.77938	0.913058	1.82315	1.09273	2.00286	2.71044
1.78584	3.32854	1.78038	0.924994	1.82414	1.09935	2.00425	2.72447
1.78684	3.35797	1.78138	0.937036	1.82513	1.10569	2.00563	2.73855
1.78786	3.38756	1.78237	0.948945	1.8261	1.11198	2.007	2.75266
1.78887	3.41711	1.78337	0.960952	1.8271	1.11851	2.00839	2.76681
1.78988	3.44673	1.78437	0.97314	1.82812	1.12505	2.00979	2.78102
1.7909	3.47681	1.78537	0.985415	1.82914	1.13183	2.01117	2.79524
1.7919	3.50663	1.78638	0.997762	1.83015	1.13835	2.01256	2.80947
1.79288	3.53672	1.78738	1.01004	1.83116	1.14497	2.01394	2.82371
1.79388	3.56734	1.78837	1.0225	1.83216	1.1516	2.01534	2.83804
1.79486	3.59742	1.78936	1.03508	1.83315	1.15817	2.01674	2.85237
1.79584	3.62759	1.79034	1.04777	1.83413	1.1652	2.01813	2.86677
1.79681	3.65806	1.79133	1.06038	1.83514	1.17189	2.01951	2.88121
1.7978	3.68856	1.79234	1.07323	1.83615	1.17893	2.0209	2.89568
1.79881	3.71918	1.79336	1.0861	1.83715	1.18583	2.02228	2.91019
1.79982	3.75001	1.79438	1.09903	1.83815	1.19291	2.02369	2.92475
1.80083	3.78092	1.79538	1.1121	1.83915	1.19992	2.02508	2.93935
1.80182	3.81186	1.79638	1.12528	1.84015	1.20685	2.02648	2.95404
1.80284	3.84284	1.79738	1.13854	1.84114	1.21403	2.02789	2.96875
1.80386	3.87412	1.79838	1.1518	1.84214	1.2211	2.02928	2.98349
1.80488	3.90539	1.79937	1.16506	1.84312	1.22841	2.03069	2.99823
1.80584	3.93664	1.80034	1.17851	1.84412	1.2355	2.0321	3.01303
1.80684	3.96809	1.80132	1.19198	1.84513	1.2428	2.0335	3.02788
1.80785	3.99967	1.80232	1.20553	1.84614	1.25002	2.0349	3.0428
1.80887	4.03135	1.80329	1.21915	1.84715	1.25748	2.03632	3.05771
1.80984	4.06315	1.8043	1.2329	1.84815	1.26489	2.03772	3.07265
1.81084	4.09502	1.80533	1.2467	1.84916	1.27215	2.03912	3.08753
1.81185	4.12689	1.80633	1.26049	1.85015	1.27938	2.04053	3.10259
1.81283	4.15886	1.80733	1.27438	1.85115	1.28674	2.04193	3.11777
1.81382	4.19098	1.80835	1.28827	1.85216	1.29444	2.04334	3.133
1.81486	4.2235	1.80936	1.30228	1.85317	1.30198	2.04475	3.14824
1.81588	4.25595	1.81038	1.31627	1.85415	1.30964	2.04617	3.16349
1.81688	4.28827	1.81138	1.33044	1.85514	1.31721	2.04759	3.17881
1.81786	4.32065	1.81239	1.34483	1.85614	1.32554	2.04902	3.19418
1.81885	4.35281	1.81338	1.3592	1.85714	1.33389	2.05044	3.2095
1.81983	4.38529	1.81437	1.37358	1.85815	1.34142	2.05187	3.22487
1.82082	4.41807	1.81537	1.38776	1.85915	1.34849	2.05329	3.24032
1.82185	4.45084	1.81638	1.40219	1.86015	1.3565	2.05471	3.25581
1.82286	4.48363	1.81738	1.41682	1.86114	1.36405
1.82385	4.51663	1.81839	1.43162	1.86211	1.37213
1.82484	4.54979	1.81942	1.44632	1.8631	1.38019
1.82585	4.58334	1.82044	1.46138	1.86411	1.38857
1.82684	4.61664	1.82143	1.47601	1.8651	1.39647
1.82782	4.64996	1.82236	1.49069	1.8661	1.40467
1.82883	4.68339	1.8233	1.50548	1.86715	1.41291
1.82984	4.71677	1.8243	1.52051	1.86817	1.42177
1.83084	4.75028	1.82534	1.53578	1.86917	1.43032
1.83183	4.78397	1.8264	1.55108	1.87017	1.43804
1.83284	4.8179	1.8274	1.56611	1.87117	1.44676
1.83384	4.85182	1.82838	1.58128	1.87217	1.45502
1.83481	4.88577	1.82938	1.59665	1.87316	1.46321
1.83581	4.9198	1.83037	1.61188	1.87415	1.4717
1.83683	4.95392	1.83136	1.62719	1.87515	1.48054
1.83786	4.98793	1.83235	1.6427	1.87615	1.48914
1.83887	5.02232	1.83335	1.65825	1.87714	1.49792
1.83985	5.05699	1.83435	1.67378	1.87815	1.50661
1.84085	5.0917	1.83535	1.68938	1.87913	1.51553
1.84184	5.12637	1.83637	1.70503	1.88012	1.52447
1.84284	5.16083	1.83738	1.72065	1.88112	1.53348
1.84383	5.19548	1.83838	1.73637	1.88213	1.54249
1.84481	5.23021	1.83937	1.75219	1.88314	1.55144
1.84581	5.26482	1.84034	1.76808	1.88412	1.56047
1.84682	5.29961	1.84133	1.78408	1.88512	1.56942
1.84783	5.33463	1.84233	1.8002	1.8861	1.57859
1.84885	5.36951	1.84335	1.81631	1.88711	1.58782
1.84986	5.40471	1.84436	1.8324	1.88813	1.59703
1.85084	5.43986	1.84537	1.84853	1.88914	1.60629
1.85183	5.47473	1.84637	1.86457	1.89014	1.61549
1.85284	5.50973	1.84736	1.88075	1.89115	1.62474
1.85385	5.54496	1.84835	1.89713	1.89212	1.63408
1.85487	5.58051	1.84934	1.91351	1.89309	1.6436
1.85586	5.61623	1.85033	1.92985	1.89408	1.65303
1.85685	5.65169	1.85134	1.94615	1.89509	1.66238
1.85786	5.68726	1.85237	1.96252	1.89612	1.67192
1.85887	5.72286	1.85339	1.97895	1.89712	1.68141
1.85983	5.75846	1.85438	1.99551	1.89812	1.69106
1.8608	5.79458	1.85534	2.01221	1.89912	1.70092
1.86181	5.83069	1.85633	2.02879	1.90011	1.71059
1.86284	5.86672	1.85734	2.04556	1.9011	1.7204
1.86382	5.90261	1.85835	2.06222	1.90211	1.73022
1.8648	5.93917	1.85934	2.07895	1.90311	1.74015
1.86581	5.976	1.86034	2.0958	1.90414	1.75022
1.8668	6.01251	1.86134	2.11264	1.90514	1.76018
1.86781	6.04901	1.86234	2.12949	1.90614	1.77014
1.86882	6.08543	1.86333	2.14641	1.90714	1.78014
1.86983	6.12205	1.86432	2.16347	1.90813	1.79007
1.87086	6.1587	1.8653	2.18064	1.90913	1.8003
1.87186	6.19536	1.86633	2.19767	1.91013	1.81039
1.87284	6.23192	1.86737	2.21472	1.91112	1.82056
1.87382	6.26835	1.86839	2.23199	1.91211	1.83097
1.87483	6.30508	1.86939	2.24918	1.91311	1.84124
1.87584	6.34184	1.87038	2.26637	1.9141	1.85166
1.87685	6.3784	1.87138	2.28364	1.91512	1.86228
1.87785	6.41529	1.87238	2.30104	1.91615	1.87275
1.87883	6.45256	1.87338	2.31826	1.91716	1.88325
1.87983	6.48993	1.87437	2.33544	1.91815	1.89382
1.88083	6.52722	1.87537	2.3528	1.91914	1.90438
1.88182	6.56469	1.87638	2.37027	1.92012	1.91504
1.88281	6.60226	1.87738	2.3883	1.92113	1.92582
1.88382	6.63964	1.87838	2.40571	1.92213	1.93628
1.88482	6.67692	1.87936	2.42288	1.92314	1.94682
1.88584	6.71504	1.88037	2.44049	1.92416	1.95767
1.88685	6.75329	1.88139	2.45825	1.92515	1.96837
1.88785	6.79139	1.88242	2.47619	1.92614	1.97924
1.88884	6.83012	1.88342	2.49374	1.9271	1.99023
1.88984	6.86859	1.88439	2.51137	1.92809	2.00134
1.89084	6.90657	1.88536	2.52913	1.9291	2.01251
1.89181	6.94479	1.88636	2.54695	1.93011	2.02373
1.89281	6.98309	1.88738	2.5653	1.93112	2.03511
1.89381	7.02157	1.88839	2.58317	1.93211	2.0463
1.89482	7.06039	1.88937	2.60095	1.93316	2.0576
1.89581	7.09951	1.89034	2.61887	1.93416	2.06895
1.89683	7.13842	1.89132	2.63673	1.93514	2.08032
1.89786	7.17715	1.89232	2.6546	1.93615	2.09169
1.89886	7.21601	1.89331	2.67241	1.93714	2.10322
1.89984	7.25472	1.89431	2.69037	1.93814	2.11469
1.90083	7.29338	1.89529	2.70845	1.93913	2.12611
1.90181	7.3325	1.89631	2.72665	1.9401	2.13772
1.90283	7.37208	1.89736	2.74479	1.94109	2.14942
1.90384	7.41175	1.89838	2.76283	1.94211	2.16103
1.90482	7.45134	1.89937	2.78097	1.94311	2.17248
1.9058	7.49068	1.90036	2.7992	1.94414	2.18417
1.90683	7.5294	1.90136	2.81756	1.94514	2.19596
1.90785	7.56798	1.90237	2.83599	1.94616	2.20792
1.90881	7.60722	1.90338	2.85453	1.94716	2.21987
1.90981	7.64702	1.90438	2.87309	1.94816	2.23184
1.91079	7.6872	1.90536	2.89149	1.94913	2.24389
1.91181	7.72878	1.90634	2.90984	1.95012	2.25589
1.91282	7.76954	1.90733	2.92832	1.95114	2.26787
1.91384	7.80924	1.90832	2.94689	1.95215	2.28
1.91484	7.84942	1.90934	2.96547	1.95316	2.29201
1.91583	7.88971	1.91035	2.98395	1.95416	2.30388
1.91682	7.92997	1.91134	3.00239	1.95512	2.31576
1.91783	7.97017	1.91233	3.02095	1.95611	2.32797
1.91884	8.01115	1.91334	3.03964	1.95712	2.34047
1.91985	8.0522	1.91436	3.05826	1.95812	2.35293
1.92084	8.09306	1.91537	3.07697	1.95913	2.36543
1.92187	8.13398	1.91637	3.09564	1.96015	2.37774
1.92288	8.17461	1.91737	3.11414	1.96116	2.38998
1.92387	8.21503	1.91838	3.13267	1.96213	2.40261
1.92486	8.25761	1.91939	3.15131	1.96314	2.41526
1.92584	8.29961	1.92038	3.17023	1.96414	2.42775
1.92683	8.34254	1.92137	3.18917	1.96514	2.44032
1.92785	8.38642	1.92236	3.20806	1.96617	2.45333
1.92884	8.42908	1.92335	3.22686	1.96722	2.46665
1.92984	8.47054	1.92435	3.24569	1.9682	2.47869
1.93083	8.51195	1.92537	3.2645	1.96915	2.49125
1.93183	8.55328	1.92637	3.28347	1.97014	2.50433
1.93285	8.59466	1.92736	3.30254	1.97116	2.51727
1.93387	8.63625	1.92837	3.32151	1.97215	2.53036
1.93486	8.67813	1.92938	3.34035	1.97313	2.54359
1.93586	8.72016	1.93038	3.35921	1.97415	2.55728
1.93686	8.76189	1.93137	3.37829	1.97515	2.56999
1.93784	8.80409	1.93236	3.39747	1.97615	2.58287
1.93883	8.84609	1.93336	3.41684	1.97716	2.59612
1.93982	8.88816	1.93437	3.43594	1.97818	2.60949
1.94085	8.93014	1.93535	3.45483	1.9792	2.62305
1.94187	8.97262	1.93633	3.47398	1.9802	2.63666
1.94285	9.01582	1.93734	3.49321	1.98116	2.6504
1.94382	9.05848	1.93833	3.51226	1.98213	2.66423
1.94481	9.10034	1.93933	3.53116	1.98314	2.67787
1.94581	9.14242	1.94034	3.55024	1.98417	2.69145
1.94682	9.18515	1.94135	3.56956	1.98517	2.70501
1.94782	9.22845	1.94234	3.58887	1.98618	2.71878
1.94883	9.27131	1.94333	3.60803	1.98716	2.7325
1.94982	9.31283	1.94434	3.62734	1.98814	2.7463
1.95082	9.35441	1.94536	3.64674	1.98913	2.7602
1.95183	9.39761	1.94638	3.66609	1.99013	2.77396
1.95284	9.44264	1.9474	3.68544	1.99116	2.78779
1.95385	9.48744	1.9484	3.70515	1.99217	2.80171
1.95486	9.53125	1.9494	3.7252	1.99314	2.81575
1.95585	9.57357	1.9504	3.74488	1.99412	2.82967
1.95685	9.61573	1.9514	3.76437	1.99514	2.84384
1.95787	9.65878	1.9524	3.78379	1.99616	2.85814
1.95889	9.70259	1.95338	3.8032	1.99716	2.87239
1.95988	9.74572	1.95437	3.82264	1.99816	2.88655
1.96085	9.78874	1.95536	3.84223	1.99916	2.90084
1.96183	9.83318	1.95637	3.86199	2.00015	2.91531
1.96285	9.87788	1.95735	3.88148	2.00116	2.9298
1.96385	9.92322	1.95832	3.90082	2.00219	2.94411
1.96483	9.9684	1.9593	3.92031	2.0032	2.95822
1.96584	10.0119	1.96029	3.94	2.00418	2.97263
1.96685	10.0541	1.96131	3.9597	2.00515	2.9873
1.96783	10.0974	1.96235	3.97927	2.00614	3.00206
1.96883	10.1411	1.96336	3.99895	2.00715	3.01703
1.96985	10.1869	1.96437	4.01875	2.00815	3.03224
1.97084	10.2324	1.96536	4.03844	2.00912	3.04726
1.97184	10.2775	1.96637	4.05811	2.01014	3.06217
1.97285	10.3236	1.96738	4.07782	2.01115	3.07707
1.97385	10.3682	1.96841	4.09775	2.01218	3.09187
1.97486	10.4122	1.96942	4.11769	2.01316	3.10676
1.97587	10.4568	1.9704	4.13747	2.01416	3.12161
1.97687	10.5016	1.97139	4.1571	2.01519	3.13666
1.97785	10.5462	1.97239	4.17694	2.01618	3.15175
1.97888	10.5905	1.97339	4.19671	2.01716	3.16675
1.9799	10.6345	1.97438	4.21659	2.01814	3.1817
1.98089	10.6786	1.97536	4.23643	2.01915	3.19685
1.98189	10.7226	1.97636	4.25632	2.02014	3.21202
1.9829	10.7682	1.97738	4.27631	2.02114	3.22709
1.98387	10.8152	1.97841	4.2961	2.02215	3.24214
1.98487	10.8605	1.9794	4.31596	2.02313	3.25713
1.98585	10.9043	1.98038	4.33608	2.02413	3.27215
1.98686	10.9488	1.98136	4.35594	2.02513	3.28867
1.98785	10.9968	1.98235	4.37566	2.02613	3.30512
1.98884	11.0456	1.98334	4.39549	2.02714	3.3207
1.98982	11.0936	1.98433	4.41552	2.02816	3.33588
1.99081	11.1402	1.98536	4.43552	2.02917	3.35076
1.99184	11.1854	1.98638	4.45553	2.03017	3.36591
1.99285	11.23	1.98738	4.47574	2.03117	3.38203
1.99384	11.2754	1.98836	4.49587	2.03218	3.39804
1.99482	11.3216	1.98935	4.51587	2.03316	3.41378
1.99582	11.3671	1.99036	4.53566	2.03417	3.42962
1.99685	11.4118	1.99136	4.55553	2.03517	3.44531
1.99787	11.4582	1.99237	4.57566	2.03616	3.46114
1.99888	11.504	1.99338	4.59595	2.03717	3.47795
1.99988	11.5496	1.99438	4.61626	2.0382	3.49391
2.00086	11.5945	1.99537	4.63647	2.0392	3.51001
2.00184	11.6401	1.99635	4.65664	2.04015	3.52603
2.00283	11.6863	1.99734	4.67663	2.04114	3.54215
2.00386	11.7315	1.99834	4.69662	2.04215	3.55842
2.00487	11.7764	1.99933	4.71686	2.04316	3.57502
2.00585	11.8209	2.00037	4.7372	2.04415	3.59109
2.00684	11.8657	2.00141	4.75747	2.04514	3.60735
2.00783	11.9122	2.00239	4.77772	2.04612	3.62347
2.00886	11.9588	2.00336	4.79809	2.04712	3.63958
2.00987	12.0042	2.00435	4.81853	2.04812	3.65612
2.01086	12.0484	2.00538	4.83871	2.04915	3.67279
2.01185	12.0931	2.00639	4.85898	2.05013	3.68919
2.01285	12.1403	2.0074	4.87941	2.05114	3.7052
2.01384	12.1929	2.00839	4.89989	2.05214	3.72117
2.01486	12.2447	2.0094	4.92032	2.05314	3.73758
2.01587	12.295	2.01041	4.94066	2.05415	3.7542
2.01685	12.343	2.0114	4.96095	2.05514	3.77088
2.01786	12.3878	2.01239	4.98137	2.05615	3.78764
2.01886	12.4323	2.0134	5.00165	2.05715	3.80441
2.01983	12.4758	2.01438	5.02194	2.05814	3.82113
2.02085	12.5213	2.01536	5.04233	2.05914	3.83789
2.02188	12.5698	2.01634	5.06295	2.06013	3.85482
2.02288	12.6184	2.01735	5.08355	2.06114	3.87195
2.02386	12.669	2.01837	5.10398	2.06215	3.88902
2.02483	12.7202	2.01939	5.12437	2.06315	3.9062
2.02586	12.7721	2.0204	5.14478	2.06416	3.92387
2.02686	12.8222	2.02139	5.16519	2.06516	3.94237
2.02784	12.8715	2.02236	5.18562	2.06616	3.96042
2.02886	12.9211	2.02336	5.20607	2.06716	3.97833
2.02986	12.9714	2.02436	5.22676	2.06816	3.99589
2.03083	13.0218	2.02538	5.24738	2.06916	4.0133
2.03181	13.0708	2.02638	5.26786	2.07015	4.03069
2.03283	13.1203	2.02739	5.28817	2.07115	4.04805
2.03386	13.1716	2.0284	5.30866	2.07215	4.06548
2.03486	13.2206	2.02937	5.32935	2.07314	4.08278
2.03586	13.2694	2.03035	5.34999	2.07414	4.10007
2.03683	13.3156	2.03138	5.37072	2.07513	4.11767
2.03783	13.3598	2.0324	5.39146	2.07615	4.13524
2.03886	13.4041	2.03339	5.4123	2.07714	4.15284
2.03986	13.4518	2.03437	5.433	2.07815	4.17061
2.04085	13.5006	2.03536	5.45347	2.07918	4.18968
2.04183	13.5517	2.03633	5.4738	2.08019	4.20951
2.04283	13.6034	2.03734	5.49432	2.08118	4.22833
2.04383	13.6526	2.03836	5.51507	2.08215	4.2463
2.04483	13.7019	2.0394	5.5358	2.08316	4.26383
2.04585	13.7494	2.04039	5.55654	2.08413	4.28155
2.04683	13.7975	2.04137	5.57729	2.08512	4.30011
2.04783	13.8471	2.04235	5.59798	2.08613	4.31908
2.04884	13.9007	2.04335	5.6185	2.08712	4.33727
2.04984	13.9544	2.04437	5.63905	2.08812	4.3551
2.05085	14.0037	2.04536	5.65961	2.08912	4.37314
2.05186	14.0504	2.04636	5.68023	2.09013	4.3912
2.05286	14.0985	2.04736	5.70091	2.09114	4.40943
2.05386	14.1478	2.04837	5.72192	2.09215	4.42769
2.05486	14.1978	2.04936	5.74285	2.09316	4.44582
2.05585	14.2469	2.05036	5.76371	2.09418	4.46378
2.05686	14.2968	2.05137	5.78444	2.09519	4.48181
2.05787	14.3476	2.0524	5.80523	2.09619	4.49991
2.05885	14.3985	2.0534	5.826	2.09717	4.51806
2.05984	14.4464	2.0544	5.84683	2.09818	4.53638
2.06084	14.4938	2.05539	5.86771	2.09917	4.55512
2.06186	14.5422	2.05637	5.88882	2.10016	4.57378
2.06286	14.5924	2.05737	5.90976	2.10117	4.59204
2.06386	14.6392	2.05836	5.9308	2.10218	4.61052
2.06486	14.6851	2.05936	5.9518	2.10318	4.62884
2.06587	14.7318	2.06038	5.97278	2.10416	4.64694
2.06687	14.7789	2.06139	5.99377	2.10514	4.66521
2.0679	14.8265	2.06239	6.01485	2.10614	4.6834
2.06888	14.8771	2.06338	6.03593	2.10715	4.70163
2.06985	14.9299	2.06437	6.05709	2.10814	4.72161
2.07083	14.9833	2.06538	6.07827	2.10915	4.74495
2.07185	15.0352	2.0664	6.09928	2.11013	4.76677
2.07285	15.0833	2.06739	6.12027	2.11114	4.78707
2.07384	15.13	2.06838	6.14121	2.11215	4.80641
2.07487	15.1787	2.06938	6.162	2.11312	4.82545
2.07587	15.2292	2.07038	6.18278	2.11413	4.84456
2.07684	15.2768	2.07138	6.20351	2.11512	4.86409
2.07783	15.3224	2.07238	6.22457	2.11612	4.88444
2.07883	15.3713	2.07338	6.24568	2.11714	4.9043
2.07984	15.4242	2.07438	6.26673	2.11814	4.92372
2.08087	15.4803	2.0754	6.2878	2.11915	4.94318
2.0819	15.5308	2.0764	6.30907	2.12014	4.96273
2.08289	15.5801	2.07736	6.3303	2.12113	4.98226
2.08388	15.6384	2.07834	6.35141	2.12215	5.00171
2.08487	15.6975	2.07936	6.37273	2.12313	5.02136
2.08588	15.7512	2.08039	6.39427	2.12412	5.04112
2.08687	15.8018	2.08139	6.41559	2.12512	5.06131
2.08786	15.8524	2.08239	6.43679	2.12614	5.08193
2.08886	15.9042	2.0834	6.45819	2.12718	5.10259
2.08986	15.9535	2.08441	6.47969	2.1282	5.12282
2.09086	16.0029	2.0854	6.50092	2.1292	5.1427
2.09189	16.0555	2.08639	6.52213	2.13015	5.16226
2.0929	16.1049	2.08739	6.54339	2.13113	5.18175
2.09391	16.1534	2.08838	6.56478	2.13215	5.20125
2.09491	16.2038	2.08936	6.58606	2.13315	5.22084
2.09586	16.2558	2.09033	6.60732	2.13413	5.24067
2.09683	16.3067	2.09133	6.62848	2.13514	5.26052
2.09782	16.3564	2.09234	6.64972	2.13616	5.28042
2.09885	16.4077	2.09335	6.67081	2.13716	5.30048
2.09986	16.457	2.09436	6.69178	2.13815	5.32059
2.10084	16.508	2.09536	6.71305	2.13913	5.34063
2.10186	16.5611	2.09634	6.73434	2.14011	5.36391
2.10287	16.6137	2.09733	6.75568	2.14109	5.39002
2.10387	16.664	2.09832	6.77691	2.14142	5.39621
2.10487	16.7138	2.09932	6.79799
2.10588	16.7663	2.10035	6.8193
2.10683	16.8204	2.10136	6.84047
2.10783	16.8742	2.10239	6.86181
2.10888	16.927	2.1034	6.88318
2.1099	16.9814	2.1044	6.90492
2.11086	17.032	2.1054	6.92655
2.11183	17.0795	2.1064	6.94821
2.11282	17.1273	2.10738	6.96948
2.11384	17.1836	2.10837	6.99079
2.11481	17.241	2.10936	7.01229
2.1158	17.2938	2.11037	7.034
2.11681	17.3449	2.11138	7.0557
2.11782	17.4023	2.11238	7.07741
2.11883	17.4582	2.11337	7.09886
2.11982	17.5073	2.11436	7.12009
2.12084	17.5524	2.11537	7.14163
2.12185	17.5973	2.11638	7.16332
2.12285	17.6512	2.11738	7.18489
2.12386	17.706	2.11839	7.20627
2.12486	17.7551	2.11939	7.22772
2.12584	17.8016	2.1204	7.24953
2.12686	17.8474	2.1214	7.27119
2.12786	17.8987	2.12235	7.29286
2.12884	17.9604	2.12333	7.31436
2.12982	18.0244	2.12433	7.33534
2.13083	18.0834	2.12535	7.35586
2.13183	18.1358	2.12638	7.37687
2.13284	18.1879	2.12739	7.39859
2.13386	18.2349	2.1284	7.42047
2.13486	18.2805	2.1294	7.44201
2.13585	18.332	2.13039	7.46357
2.13686	18.3873	2.13139	7.48514
2.13783	18.442	2.13239	7.50683
2.13882	18.4941	2.13339	7.52858
2.13984	18.5452	2.1344	7.55011
2.14083	18.5993	2.1354	7.57176
2.14142	18.6246	2.13638	7.59327
		2.13735	7.61486
		2.13834	7.63625
		2.13933	7.65819
		2.14032	7.6803
		2.14134	7.70194
		2.14233	7.72347
		2.14302	7.73748

## Sheet: Figure_8
Time / s	Voltage / V
	Ganma-MnO2	Pt/C	Ir/C (Premetek)
1	0.461071	0.857369	0.733203
2	0.58701	0.928374	0.830535
3	0.641605	0.975086	0.904186
4	0.673432	1.00969	0.962576
5	0.694895	1.03816	1.01441
6	0.711046	1.0636	1.06305
7	0.724274	1.08731	1.10925
8	0.73571	1.11009	1.15302
9	0.746037	1.13241	1.19414
10	0.755538	1.15461	1.2326
11	0.764435	1.17655	1.26772
12	0.772935	1.19857	1.29899
13	0.781145	1.22049	1.32619
14	0.789144	1.24211	1.34952
15	0.796991	1.2633	1.36939
16	0.804812	1.28389	1.38675
17	0.812584	1.30379	1.40183
18	0.820321	1.32285	1.41431
19	0.828091	1.34096	1.42375
20	0.836039	1.35817	1.43049
21	0.84403	1.37433	1.43516
22	0.852168	1.38947	1.43842
23	0.860479	1.40346	1.44086
24	0.869023	1.41636	1.44296
25	0.877728	1.42828	1.44467
26	0.886715	1.43941	1.44605
27	0.895909	1.44984	1.44725
28	0.905426	1.45966	1.44844
29	0.91525	1.46884	1.44938
30	0.925359	1.47747	1.45043
31	0.935712	1.48545	1.45127
32	0.946423	1.49294	1.45178
33	0.95733	1.49995	1.45272
34	0.968503	1.50643	1.4535
35	0.979921	1.5125	1.45419
36	0.991616	1.51809	1.45475
37	1.00352	1.52336	1.45542
38	1.01571	1.52836	1.45604
39	1.02812	1.53296	1.4565
40	1.04088	1.5374	1.4569
41	1.05387	1.54152	1.45724
42	1.06722	1.54539	1.45786
43	1.08088	1.54903	1.45847
44	1.09499	1.5525	1.45885
45	1.10942	1.55576	1.45931
46	1.12429	1.55888	1.45961
47	1.13947	1.56181	1.4599
48	1.155	1.56458	1.46035
49	1.17064	1.56724	1.46085
50	1.18683	1.56972	1.46118
51	1.20327	1.57218	1.46146
52	1.21998	1.57446	1.46183
53	1.23676	1.57676	1.4621
54	1.25371	1.57883	1.4623
55	1.27055	1.58067	1.46259
56	1.2874	1.58266	1.46303
57	1.30397	1.58448	1.46354
58	1.32026	1.58625	1.46382
59	1.33606	1.58786	1.46413
60	1.35121	1.58953	1.46441
61	1.36553	1.59093	1.46466
62	1.37901	1.59254	1.46483
63	1.39163	1.59398	1.46507
64	1.40356	1.59538	1.46527
65	1.41489	1.59667	1.46558
66	1.42579	1.59799	1.46588
67	1.43629	1.59908	1.46615
68	1.44653	1.60035	1.46636
69	1.45646	1.60139	1.46657
70	1.46615	1.6027	1.46676
71	1.4755	1.60378	1.46696
72	1.48456	1.6048	1.46717
73	1.49323	1.60584	1.46756
74	1.5014	1.60677	1.46772
75	1.50933	1.60787	1.46789
76	1.51694	1.60874	1.46814
77	1.5241	1.60959	1.46846
78	1.53095	1.61054	1.4687
79	1.53751	1.61138	1.46897
80	1.54384	1.61219	1.46914
81	1.54992	1.61313	1.46932
82	1.55578	1.61392	1.46948
83	1.56156	1.61471	1.46964
84	1.56723	1.61557	1.46981
85	1.57282	1.61623	1.46994
86	1.5783	1.61693	1.47009
87	1.58373	1.61761	1.47023
88	1.58916	1.61835	1.47039
89	1.59448	1.61901	1.47049
90	1.59976	1.61963	1.47073
91	1.60498	1.62028	1.4709
92	1.61011	1.62098	1.47098
93	1.61505	1.6216	1.47108
94	1.61986	1.62224	1.47112
95	1.62441	1.62279	1.47123
96	1.62871	1.62341	1.47124
97	1.63261	1.624	1.4713
98	1.63621	1.62461	1.47135
99	1.63946	1.62518	1.47144
100	1.64248	1.6257	1.47152
101	1.64518	1.62624	1.47157
102	1.64767	1.62681	1.47163
103	1.64991	1.62732	1.47172
104	1.65195	1.62777	1.47178
105	1.65389	1.62821	1.47186
106	1.65572	1.62879	1.47193
107	1.65744	1.6293	1.47203
108	1.65895	1.62976	1.47209
109	1.66047	1.63018	1.47217
110	1.66181	1.63065	1.47222
111	1.66318	1.63114	1.47227
112	1.66449	1.63164	1.47232
113	1.66565	1.63208	1.47238
114	1.6668	1.63252	1.47243
115	1.66792	1.63285	1.47253
116	1.66894	1.63316	1.47257
117	1.66982	1.63356	1.47263
118	1.67091	1.63408	1.47266
119	1.67187	1.63453	1.47271
120	1.67282	1.63494	1.47275
121	1.67372	1.63532	1.47281
122	1.67466	1.63567	1.47284
123	1.67546	1.63603	1.47287
124	1.6763	1.63638	1.47291
[truncated: 99,875 more rows]
